# Supplementary material for: Top research priorities in liver and gallbladder disorders in the UK
Source: PubMed Central journal article supplement — BMJ Open. 2019 Mar 7;9(3):e025045. doi: 10.1136/bmjopen-2018-025045 (PMC6429888; doi:10.1136/bmjopen-2018-025045), 2019-03-07
Supplement: bmjopen-2018-025045.draft_revisions.pdf [file bmjopen-2018-025045.draft_revisions.pdf]

# BMJ Open

BMJ Open is committed to open peer review. As part of this commitment we make the peer review history of every article we publish publicly available.

When an article is published we post the peer reviewers' comments and the authors' responses online. We also post the versions of the paper that were used during peer review. These are the versions that the peer review comments apply to.

The versions of the paper that follow are the versions that were submitted during the peer review process. They are not the versions of record or the final published versions. They should not be cited or distributed as the published version of this manuscript.

BMJ Open is an open access journal and the full, final, typeset and author-corrected version of record of the manuscript is available on our site with no access controls, subscription charges or pay-per-view fees (<http://bmjopen.bmj.com>).

If you have any questions on BMJ Open's open peer review process please email [info.bmjopen@bmj.com](mailto:info.bmjopen@bmj.com)

# BMJ Open

## TOP RESEARCH PRIORITIES IN LIVER AND GALLBLADDER DISORDERS IN THE UNITED KINGDOM

|                               |                                                                                                                                                                                                                                                                                                                                                                                                                                                                                                                                                                                                                                                                                                                                                                                                                                                                                                                                                                                                                                                                                                                                                                                                                          |
|-------------------------------|--------------------------------------------------------------------------------------------------------------------------------------------------------------------------------------------------------------------------------------------------------------------------------------------------------------------------------------------------------------------------------------------------------------------------------------------------------------------------------------------------------------------------------------------------------------------------------------------------------------------------------------------------------------------------------------------------------------------------------------------------------------------------------------------------------------------------------------------------------------------------------------------------------------------------------------------------------------------------------------------------------------------------------------------------------------------------------------------------------------------------------------------------------------------------------------------------------------------------|
| Journal:                      | <i>BMJ Open</i>                                                                                                                                                                                                                                                                                                                                                                                                                                                                                                                                                                                                                                                                                                                                                                                                                                                                                                                                                                                                                                                                                                                                                                                                          |
| Manuscript ID                 | bmjopen-2018-025045                                                                                                                                                                                                                                                                                                                                                                                                                                                                                                                                                                                                                                                                                                                                                                                                                                                                                                                                                                                                                                                                                                                                                                                                      |
| Article Type:                 | Research                                                                                                                                                                                                                                                                                                                                                                                                                                                                                                                                                                                                                                                                                                                                                                                                                                                                                                                                                                                                                                                                                                                                                                                                                 |
| Date Submitted by the Author: | 02-Jul-2018                                                                                                                                                                                                                                                                                                                                                                                                                                                                                                                                                                                                                                                                                                                                                                                                                                                                                                                                                                                                                                                                                                                                                                                                              |
| Complete List of Authors:     | Gurusamy, Kurinchi; University College London, Walmsley, Martine; PSC Support<br>Davidson, Brian; Royal Free London NHS Foundation Trust, HPB Surgery<br>Frier, Claire; Royal Free London NHS Foundation Trust, HPB Surgery<br>Fuller, Barry; University College London<br>Madden, Angela; University of Hertfordshire<br>Masson, Steven; Freeman Hospital<br>Morley, Richard; Cochrane Collaboration Consumer Network<br>Safarik, Ivana; Carolside Medical Centre<br>Tsochatzis, E; University College London<br>Ahmed, Irfan; NHS Grampian<br>Cowlin, Maxine; Patient representative<br>Dillon, John; University of Dundee Division of Cardiovascular and Diabetes Medicine, Liver Group<br>Ellicott, Graham; Patient representative<br>Elsharkawy, Ahmed; Queen Elizabeth Hospital Birmingham<br>Farrington, Liz; Royal Cornwall Hospitals NHS Trust<br>Glachan, Anthony; Patient representative<br>Kumar, Nagappan; University Hospital of Wales<br>Milne, EJ; Patient representative<br>Rushbrook, Simon; Norfolk and Norwich University Hospitals NHS Foundation Trust,<br>Smith, Amanda; Queen Elizabeth Hospital Birmingham<br>Stafford, Lizzie; John Radcliffe Hospital<br>Yeoman, Andrew; Royal Gwent Hospital |
| Keywords:                     | liver, chronic liver disease, research priorities                                                                                                                                                                                                                                                                                                                                                                                                                                                                                                                                                                                                                                                                                                                                                                                                                                                                                                                                                                                                                                                                                                                                                                        |
|                               |                                                                                                                                                                                                                                                                                                                                                                                                                                                                                                                                                                                                                                                                                                                                                                                                                                                                                                                                                                                                                                                                                                                                                                                                                          |

SCHOLARONE™  
Manuscripts

# 1 TOP RESEARCH PRIORITIES IN LIVER AND

## 2 GALLBLADDER DISORDERS IN THE UNITED KINGDOM

3 Kurinchi S Gurusamy<sup>1</sup>, Martine Walmsley<sup>2</sup>, Brian R Davidson<sup>3</sup>, Claire Frier<sup>4</sup>, Barry Fuller<sup>5</sup>, Angela  
4 Madden<sup>6</sup>, Steven Masson<sup>7</sup>, Richard Morley<sup>8</sup>, Ivana Safarik<sup>9</sup>, Emmanuel A Tsochatzis<sup>10</sup>, Irfan Ahmed<sup>11</sup>,  
5 Maxine Cowlin<sup>12</sup>, John F Dillon<sup>13</sup>, Graham Ellicott<sup>12</sup>, Ahmed M Elsharkawy<sup>14</sup>, Liz Farrington<sup>15</sup>, Anthony  
6 Glachan<sup>12</sup>, Nagappan Kumar<sup>16</sup>, EJ Milne<sup>12</sup>, Simon M Rushbrook<sup>17</sup>, Amanda Smith<sup>18</sup>, Lizzie Stafford<sup>19</sup>,  
7 Andrew Yeoman<sup>20</sup>

8 <sup>1</sup>Reader in Surgery, Royal Free Campus, University College London, United Kingdom

9 <sup>2</sup>Chair of Trustees, PSC Support, United Kingdom

10 <sup>3</sup>Professor of Surgery, Royal Free Campus, University College London, United Kingdom

11 <sup>4</sup>Cancer nurse specialist, HPB, Royal Free Hospital, London, United Kingdom

12 <sup>5</sup>Professor of Surgery, Royal Free Campus, University College London, United Kingdom

13 <sup>6</sup>Subject Group Lead for Nutrition and Dietetics, University of Hertfordshire, United Kingdom

14 <sup>7</sup>Consultant hepatologist, Freeman Hospital, Newcastle, United Kingdom

15 <sup>8</sup>James-Lind Alliance advisor

16 <sup>9</sup>General Practitioner, Carolside Medical Centre, Clarkston, Glasgow, United Kingdom

17 <sup>10</sup>Senior lecturer in Hepatology/Consultant hepatologist, UCL Institute for Liver and Digestive Health

18 Royal Free Hospital and University College London, United Kingdom

19 <sup>11</sup>Professor of Surgery, NHS Grampian, Aberdeen, United Kingdom

20 <sup>12</sup>Patient and public representative, United Kingdom

21 <sup>13</sup>Professor of Hepatology & Gastroenterology, NHS Tayside, Gastroenterology Dundee, UK

1  
2  
3 22 <sup>14</sup>Consultant Hepatologist, Queen Elizabeth Hospital, Birmingham, United Kingdom  
4

5 23 <sup>15</sup>Consultant Nurse Hepatology, Royal Cornwall Hospital, Truro, United Kingdom  
6  
7

8 24 <sup>16</sup>Consultant HPB Surgeon, University Hospital of Wales, Cardiff, United Kingdom  
9

10 25 <sup>17</sup>Consultant Hepatologist, Norfolk and Norwich University Hospital, Norwich, United Kingdom  
11  
12

13 26 <sup>18</sup>Specialist Pharmacist – Liver, Queen Elizabeth Hospital, Birmingham, United Kingdom  
14  
15

16 27 <sup>19</sup>Hepatology Research Nurse, John Radcliffe Hospital, Oxford, United Kingdom  
17  
18

19 28 <sup>20</sup>Consultant Hepatologist, Royal Gwent Hospital, Newport, United Kingdom  
20  
21

22 29 Corresponding author: Kurinchi S Gurusamy  
23

24 30 Postal address: Floor 9, Royal Free Hospital, Royal Free Campus UCL, Rowland Hill Street, London  
25  
26

27 31 NW3 2PF; Email: [k.gurusamy@ucl.ac.uk](mailto:k.gurusamy@ucl.ac.uk)  
28  
29

30 32 Word count: 3569  
31

32 33 Keywords: liver, chronic liver disease  
33  
34  
35  
36  
37  
38  
39  
40  
41  
42  
43  
44  
45  
46  
47  
48  
49  
50  
51  
52  
53  
54  
55  
56  
57  
58  
59  
60

## 34 ABSTRACT

35 Objectives: There is a mismatch between research questions considered important by patients,  
36 carers, and healthcare professionals and the research performed in many fields of medicine. The  
37 Non-Alcohol-Related Liver and gallbladder disorders Priority setting partnership (NARLIP) was  
38 established to identify the top research priorities in the prevention, diagnostic, and treatment of  
39 gallbladder disorders and liver disorders not covered by the James-Lind Alliance (JLA) Alcohol-related  
40 liver disease (ARLD) Priority Setting Partnership.

41 Design: The methods broadly followed the principles of the JLA guidebook. The one major deviation  
42 from the JLA methodology was the final step of identifying priorities: instead of prioritisation by  
43 group discussions at a consensus workshop involving stakeholders, the prioritisation was achieved  
44 by a modified Delphi consensus process.

45 Results: A total of 428 unique valid diagnostic or treatment research questions were identified. A  
46 literature review established that none of these questions were considered 'answered' i.e. high  
47 quality systematic reviews suggest that further research is not required on the topic. The Delphi  
48 panel achieved consensus (at least 80% Delphi panel members agreed) that a research question was  
49 a top research priority for six questions. Four additional research questions with highest proportion  
50 of Delphi panel members ranking the question as highly important were added to constitute the top  
51 10 research priorities.

52 Conclusions: A priority setting process involving patients, carers and healthcare professionals has  
53 been used to identify the top ten priority areas for research related to liver and gallbladder  
54 disorders. Basic, translational, clinical, and public health research are required to address these  
55 uncertainties.

56 Keywords: liver, chronic liver disease

57 Word count: 3618

## ARTICLE SUMMARY

### Strengths and limitations

- A research prioritisation process involving clinicians, patients and carer, and public representatives was performed in the field of liver and gallbladder disorders. This will help to address the mismatch between research questions that are considered important jointly by patients, carers, and healthcare professionals and the research performed in the field of liver and gallbladder disorders.
- A Delphi consensus method was performed. This prevented dominance of 'loud voices', a problematic issue with small and large group discussions.
- Because of the predominance of people with chronic liver disease on the Delphi panel, many of the top research priorities related to chronic liver diseases.

## INTRODUCTION

Failure to address treatment uncertainties by research can lead to significant suffering and deaths [1]. It is important that research in any field of medicine takes into account the shared interests of patients, carers and clinicians [2]. However, there is a mismatch between research questions that are considered important jointly by patients, carers, and healthcare professionals and the research performed in many fields of medicine [3 4]. The James Lind Alliance (JLA) exists to help ensure a patient-centred process and enables the limited research resources to be utilised in addressing the research questions that are considered important jointly by patients, carers, and healthcare professionals [2] ('top research priorities'). This is achieved by forming 'Priority Setting Partnerships' (PSPs) between patients, carers, and healthcare professionals [2].

There has only been one formal research prioritisation process involving patients, carers, and healthcare professionals in the field of liver and gallbladder disorders [5]. However, the scope of that PSP was limited to alcohol-related liver disorders [5]. The Non-Alcohol-Related Liver and

1  
2  
3 82 gallbladder disorders Priority setting partnership (NARLIP) was established to address the  
4  
5 83 prevention, diagnostic, and treatment uncertainties related to the majority of liver disorders which  
6  
7 84 were not covered by the JLA PSP on alcohol-related liver diseases (ARLD) [5] and to include  
8  
9 85 gallbladder disease.

10  
11  
12 86 The aims and objectives of the NARLIP were to work with patients, their carers, and  
13  
14 87 healthcare professionals treating them ('stakeholders') to identify uncertainties about the diagnostic  
15  
16 88 tests and effects of prevention and treatments for non-alcohol related liver and gallbladder  
17  
18 89 disorders, to agree by consensus a prioritised list of those uncertainties for research, to publicise the  
19  
20 90 results and process, and to take the results to research commissioning bodies to be considered for  
21  
22 91 funding and researchers to encourage them to submit grant applications addressing these  
23  
24 92 uncertainties.

## 27 93 **METHODS**

28  
29  
30 94 The methods broadly followed the principles of the JLA guidebook.[6] The broad steps involved the  
31  
32 95 following and are summarised in Figure 1.

- 33  
34  
35 96 1. Formation of the partnership: organisations and individuals representing people affected by  
36  
37 97 non-alcohol related liver or gallbladder disorders, their carers, and healthcare professionals  
38  
39 98 treating people with non-alcohol related liver and gallbladder disorders. A partnership was  
40  
41 99 formed between KG representing University College London and the British Liver Trust  
42  
43  
44 100 initially, but following reorganisation in the British Liver Trust, PSC Support [7] became the  
45  
46 101 leading patient organisation partner of this process. A steering committee was formed. The  
47  
48 102 members of the steering committee who participated in the complete process were KG,  
49  
50 103 MW, BRD, CF, BF, AM, RM, SM, IS, and ET.
- 51  
52 104 2. Establishment of the scope: the steering committee members discussed and decided that  
53  
54 105 the scope should include adult and paediatric liver and gallbladder disorders which required

- 1  
2  
3 106 medical and surgical treatments. The protocol was registered with James-Lind Alliance  
4  
5 107 Priority Setting Partnership.  
6  
7 108 3. Identifying potential research questions: research questions were collected through online  
8  
9 109 surveys and searching UK Database of Uncertainties about the Effects of Treatments (UK  
10  
11 110 DUETs), research recommendations in high quality systematic reviews and clinical  
12  
13 111 guidelines, and registers of ongoing research.  
14  
15 112 4. Refining research questions: the research questions identified in the above step were  
16  
17 113 reviewed and where necessary combined to result in a set of unique research questions.  
18  
19 114 Research questions were considered 'answered' when recent high-quality systematic  
20  
21 115 reviews (based on low risk of bias studies) concluded that further research was not required.  
22  
23 116 Removal of such 'answered' research questions was planned. The remaining questions were  
24  
25 117 'uncertainties'.  
26  
27  
28 118 5. Interim prioritisation: To shortlist the set of questions to manageable levels for the final  
29  
30 119 prioritisation process, the members of the steering committee ranked the uncertainties after  
31  
32 120 stratifying the questions as medical and surgical questions. The members of the steering  
33  
34 121 committee agreed that the interim prioritisation list should consist of 75% medical questions  
35  
36 122 and 25% surgical questions. This decision was an arbitrary decision made by the steering  
37  
38 123 committee based on the rationale that majority of individuals with liver and gallbladder  
39  
40 124 disorders are treated medically but a minority require surgery which have a major impact on  
41  
42 125 patients' lives.  
43  
44  
45 126 6. Final prioritisation by consensus: A modified Delphi consensus method was followed to  
46  
47 127 identify the top priorities using methods described by Jones et al [8]. The steps in the  
48  
49 128 modified Delphi consensus method were as follows.  
50  
51 129 a. A Delphi panel consisting of patients, their carers, and healthcare professionals  
52  
53 130 treating them was formed. A total of 42 people expressed interest in joining the  
54  
55  
56  
57  
58  
59  
60



1  
2  
3 131 Delphi panel and 33 panel members completed all three rounds. Details of the  
4  
5 132 Delphi panel composition and drop-outs are reported in the results section.  
6  
7 133 b. A total of three rounds were conducted.  
8  
9 134 c. Delphi panel members scored the short-listed questions in the interim prioritisation  
10  
11 135 process on a scale of 1 to 9 with 1 being considered least important and 9 being  
12  
13 136 considered most important. Scores of 1 to 3 were categorised as 'less important', 4  
14  
15 137 to 6 as 'moderately important', and 7 to 9 as 'highly important'. Panel members  
16  
17 138 were requested to score the questions according to the importance of the question  
18  
19 139 to them/the persons that they represent or treat and could leave questions that  
20  
21 140 they were unable to score empty. Each Delphi panel member could add a maximum  
22  
23 141 of two questions in the first round to ensure that the questions most important to  
24  
25 142 the Delphi panel members were included in the prioritisation process even if they  
26  
27 143 were not identified in the earlier steps. In the subsequent rounds, the panel  
28  
29 144 members were shown the summary scores and their previous score for each  
30  
31 145 question. They were able to retain or change their score in each of the rounds after  
32  
33 146 the first round. For calculation of the summary scores and the proportion  
34  
35 147 considering a question 'highly important', non-responses were excluded.  
36  
37 148 d. Consensus about a specific research question being a top research priority was  
38  
39 149 reached when 80% or more Delphi panel members considered the research question  
40  
41 150 as highly important (allocated scores between 7 and 9).  
42  
43 151 e. When fewer than 10 research priorities were obtained by consensus, the remaining  
44  
45 152 priorities were completed by uncertainties based on the highest proportions of  
46  
47 153 panel members agreeing that the research question was highly important (scores  
48  
49 154 between 7 and 9).  
50  
51  
52  
53  
54  
55  
56  
57  
58  
59  
60

1  
2  
3 155 f. There was no restriction on the Delphi panel to consult others while scoring the  
4  
5 156 questions. However, only one final response on the set of questions was accepted  
6  
7 157 from each Delphi panel member.  
8  
9

10 158 When there were no recent high-quality systematic reviews on the research question, we have  
11  
12 159 recommended high-quality systematic reviews. When recent high-quality systematic reviews  
13  
14 160 recommended high-quality research, we have recommended randomised controlled trials for  
15  
16 161 prevention and treatment, as such studies carry the lowest risk of bias if conducted well; we would  
17  
18 162 have recommended well conducted diagnostic test accuracy studies for diagnostic uncertainties. All  
19  
20 163 online surveys were completed using Google Forms designed by KG. The Delphi process was  
21  
22 164 completed using Microsoft Excel and email.  
23  
24

25 165 Ethical approval was not deemed necessary because no personal identifiable information  
26  
27 166 was being collected, and the questions were being asked of healthcare professionals, patients and  
28  
29 167 their carers were not considered sensitive questions. In addition, we had full support of patient  
30  
31 168 organisations with involvement of patient representatives throughout the whole process rather than  
32  
33 169 patients visiting the hospitals.  
34  
35

## 36 170 **Patient and Public involvement**

37  
38 171 Patients and public were involved in all aspects of this project: they were part of the steering  
39  
40 172 committee and were involved in the definition of the scope, methodology used for the prioritisation  
41  
42 173 process, identification of further patients and public representatives, participation in the Delphi  
43  
44 174 panel, interpretation, and critical revisions of the draft report. They will be involved in the  
45  
46 175 dissemination of the findings through patient websites, patient forums, and to research funders.  
47  
48  
49  
50  
51  
52  
53  
54  
55  
56  
57  
58  
59  
60

## 176 RESULTS

### 177 Identification and refining of research uncertainties

178 A total of 126 patients, carers, and those at risk of developing non-alcohol related liver and  
179 gallbladder disorders, and 13 healthcare professionals participated in the first survey which was  
180 conducted between July and December 2015. This survey resulted in a total of 209 unique research  
181 questions. In addition, 219 unique questions were identified from searching the UK DUETs, Pubmed,  
182 and ClinicalTrials.gov on 2<sup>nd</sup> January 2016. A total of 428 unique valid (i.e. falling within the remit of  
183 this priority setting partnership) research questions (247 medical-related and 181 surgery-related)  
184 were identified from these sources. None of the research questions had been answered by recent  
185 high-quality systematic reviews based on low risk of bias studies which concluded that further  
186 research was not required. Therefore, all the 428 research questions were considered research  
187 ‘uncertainties’. The complete list of 428 unique valid uncertainties in no particular order is available  
188 in Online Supplement Appendix 1. This has been converted to the population, intervention, control,  
189 and outcomes (PICO) format whenever possible.

### 190 Interim priorities

191 To identify a shortlist of questions (from the list of 429 questions) that were to be considered for the  
192 next step, a total of 48 research priorities (36 medical questions and 12 surgical questions) were  
193 identified on the basis of being selected by at least one patient or carer and healthcare professional  
194 of the steering committee (24 questions) and obtaining the highest ranks among the members of the  
195 steering committee (additional 24 questions). The list of 48 questions identified as interim priorities  
196 in no particular order is available in Online Supplement Appendix 2.

### 197 Final priorities

198 A total of 42 people expressed interest in joining the Delphi panel and 33 panel members completed  
199 all three rounds. Five people dropped out before they returned the scores of the first round, three  
200 between first and second rounds, and one between the second and third rounds. Of the 33 panel

201 members who completed all the three rounds, 17 were healthcare professionals and 16 were  
 202 patients, carers, and general public. Of the 17 healthcare professionals, six were hepatologists, four  
 203 were surgeons, two were hepatology nurses, and the remaining were general practitioner (GP), HPB  
 204 surgery (hepato-pancreato biliary) nurse, organ preservation biologist, dietician, and pharmacist  
 205 (one each). Of the 16 patients, carers, and general public, there was representation from general  
 206 public and various liver diseases including autoimmune diseases such as primary sclerosing  
 207 cholangitis, primary biliary cholangitis, autoimmune hepatitis, viral hepatitis, metabolic diseases  
 208 such as non-alcohol related fatty liver disease, and other diseases such as hepatocellular carcinoma  
 209 and polycystic liver disease. There was also representation of liver transplanted patients in the  
 210 Delphi panel. In total, 23 panel members were from England, seven were from Scotland, and three  
 211 were from Wales. There were no panel members from Northern Ireland despite attempts to include  
 212 panel members from Northern Ireland.

213 A total of 22 additional questions were added by the Delphi panel members in the first  
 214 round of the Delphi process. The Delphi panel achieved consensus that an uncertainty was a top  
 215 research priority for six research questions. Four additional research questions with the highest  
 216 proportion of Delphi panel members scoring the question as highly important (scores between 7 and  
 217 9) were added to constitute the top 10 research priorities. The list of the top 10 research priorities  
 218 (in the order of proportion who agreed that the uncertainty is a very important research priority) is  
 219 available in Table 1. All the top 10 research priorities were prevention and treatment uncertainties,  
 220 and none were diagnostic test uncertainties.

221 **Table 1 Treatment uncertainties for which consensus that the**  
 222 **uncertainty is a research priority was reached**

| Treatment uncertainty (Research question) | Proportion<br>who rated this | Median<br>(interqua |
|-------------------------------------------|------------------------------|---------------------|
|-------------------------------------------|------------------------------|---------------------|

|                                                                                                                                                  | question as highly important in the final round | rtile range) in the final round |
|--------------------------------------------------------------------------------------------------------------------------------------------------|-------------------------------------------------|---------------------------------|
| What is the best treatment for people with early or very early hepatocellular carcinoma (HCC)?                                                   | 93.5%                                           | 8(7,9)                          |
| What are the best treatments that cure or delay the progression (worsening) of primary sclerosing cholangitis (PSC)?                             | 93.3%                                           | 8(7,9)                          |
| What are the best treatments that cure or delay the progression (worsening) of non-alcohol-related fatty liver disease (NAFLD)?                  | 90.3%                                           | 9(8,9)                          |
| What is the best immunosuppressive regimen in adults undergoing liver transplantation?                                                           | 90.3%                                           | 8(7,9)                          |
| Should general public be educated about non-alcohol-related fatty liver disease (NAFLD) with an aim to reduce the numbers of those that have it? | 81.8%                                           | 8(7,9)                          |
| What are the best treatments that cure or delay the progression (worsening) of autoimmune hepatitis (AIH)?                                       | 80.6%                                           | 8(7,9)                          |
| What are the best treatments that cure or delay the progression (worsening) of non-alcohol related steatohepatitis (NASH)?                       | 76.7%                                           | 8(6.75,9)                       |
| Prior to liver transplantation, is it better to transport the                                                                                    | 74.2%                                           | 7(6,9)                          |

|                                                                                                                                                                                                                                            |       |        |
|--------------------------------------------------------------------------------------------------------------------------------------------------------------------------------------------------------------------------------------------|-------|--------|
| donor liver using a machine which pumps blood or preservation solution through the liver (machine perfusion) or is it better to transport it in the standard way of transporting it immersed in cold preservation solution (cold storage)? |       |        |
| What are the best treatments that cure or delay the progression (worsening) of primary biliary cholangitis (PBC)?                                                                                                                          | 74.2% | 7(6,8) |
| Are there any treatments that reverse the liver damage in primary sclerosing cholangitis (PSC)?                                                                                                                                            | 72.4% | 7(6,9) |

223

224 A summary of the availability of systematic review of randomised controlled trials on the topic of the  
 225 individual questions, randomised controlled trials on the topic not included in the systematic review  
 226 (if one exists), and the outcomes evaluated in these RCTs are listed in Table 2. Table 2 also contains a  
 227 suggestion for the next research steps. The list of the existing trials was compiled by searching  
 228 ClinicalTrials.gov on 7<sup>th</sup> April 2018. The references to the trials not included in the systematic reviews  
 229 is available in Online Supplement Appendix 3. As seen in Table 2, a well-designed RCT is the next  
 230 step for eight of these top 10 research questions. This is because it appears that the outcomes in  
 231 those trials will not address the outcomes listed in the research questions.

232 **Table 2 Next step to address the top 10 research priorities based on**  
 233 **current best evidence (summary)**

| Treatment uncertainty (Research question) | High-quality systematic review <sup>a, c</sup> | RCTs not included in the systematic review <sup>a, c</sup> | Patient-oriented outcomes assessed in | Next step |
|-------------------------------------------|------------------------------------------------|------------------------------------------------------------|---------------------------------------|-----------|
|-------------------------------------------|------------------------------------------------|------------------------------------------------------------|---------------------------------------|-----------|

|                                                                                                | review<br>a,b |          | trials not<br>included in<br>the<br>systematic<br>review <sup>d</sup>  |                                                                                                                                           |
|------------------------------------------------------------------------------------------------|---------------|----------|------------------------------------------------------------------------|-------------------------------------------------------------------------------------------------------------------------------------------|
| What is the best treatment for people with early or very early hepatocellular carcinoma (HCC)? | [9]           | 8 trials | Survival (7 trials),<br>recurrence (5 trials),<br>morbidity (3 trials) | High-quality RCTs of interventions not covered in ongoing trials and comparison of health-related quality (HRQoL) in different treatments |
| What are the best treatments that cure or delay the progression (worsening) of                 | [10]          | 9 trials | None of the trials include                                             | High-quality                                                                                                                              |

|                                                                                                                                 |                                                    |                                                                                                                                                                                                                     |                                                                                                                                                                                                                                               |                                                                                                                                                                            |
|---------------------------------------------------------------------------------------------------------------------------------|----------------------------------------------------|---------------------------------------------------------------------------------------------------------------------------------------------------------------------------------------------------------------------|-----------------------------------------------------------------------------------------------------------------------------------------------------------------------------------------------------------------------------------------------|----------------------------------------------------------------------------------------------------------------------------------------------------------------------------|
| primary sclerosing cholangitis (PSC)?                                                                                           |                                                    |                                                                                                                                                                                                                     | survival, HRQoL as outcomes <sup>e</sup>                                                                                                                                                                                                      | RCTs with clinical outcomes                                                                                                                                                |
| What are the best treatments that cure or delay the progression (worsening) of non-alcohol-related fatty liver disease (NAFLD)? | [11] (includes only pharmacological interventions) | More than 10 published trials on lifestyle interventions and more than 20 trials on nutritional supplementation with no recent high-quality systematic reviews<br><u>Pharmacological interventions</u><br>44 trials | Lifestyle interventions and nutritional supplementation<br>Not applicable as there are no high quality systematic reviews<br><u>Pharmacological intervention</u><br>s<br>Health-related quality of life (2 trials), resolution of fatty liver | High-quality systematic reviews on lifestyle interventions (one review) and nutritional supplementation to cure or delay the progression of NAFLD and high-quality RCTs on |



1  
2  
3  
4  
5  
6  
7  
8  
9  
10  
11  
12  
13  
14  
15  
16  
17  
18  
19  
20  
21  
22  
23  
24  
25  
26  
27  
28  
29  
30  
31  
32  
33  
34  
35  
36  
37  
38  
39  
40  
41  
42  
43  
44  
45  
46  
47  
48  
49  
50  
51  
52  
53  
54  
55  
56  
57  
58  
59  
60

|                                                                                        |                                                  |                                                                                                                   |                                                                                                                                               |                                                                                                            |
|----------------------------------------------------------------------------------------|--------------------------------------------------|-------------------------------------------------------------------------------------------------------------------|-----------------------------------------------------------------------------------------------------------------------------------------------|------------------------------------------------------------------------------------------------------------|
|                                                                                        |                                                  |                                                                                                                   | disease (11 trials), mortality (2 trials), cirrhosis (2 trials), cardiovascular events (2 trials) <sup>e</sup>                                | pharmacological interventions with clinical outcomes                                                       |
| What is the best immunosuppressive regimen in adults undergoing liver transplantation? | [12] (covers only maintenance immunosuppression) | <u>Induction immunosuppression</u> More than 20 published trials<br><u>Maintenance immunosuppression</u> 4 trials | <u>Induction immunosuppression</u> Not applicable as there is no high quality systematic review<br><u>Maintenance immunosuppression</u> Graft | High-quality systematic review on induction immunosuppressive regimen and high-quality RCTs on maintenance |

|                                                                                                                                                  |                                                                                                                                                      |           |                                                                                                   |                                                    |
|--------------------------------------------------------------------------------------------------------------------------------------------------|------------------------------------------------------------------------------------------------------------------------------------------------------|-----------|---------------------------------------------------------------------------------------------------|----------------------------------------------------|
|                                                                                                                                                  |                                                                                                                                                      |           | survival (1 trial)<br>Adverse events (1 trial)<br>Hepatocellular carcinoma (1 trial) <sup>e</sup> | immunosuppression with important clinical outcomes |
| Should general public be educated about non-alcohol-related fatty liver disease (NAFLD) with an aim to reduce the numbers of those that have it? | None                                                                                                                                                 | None      | -                                                                                                 | High-quality RCTs on education to prevent NAFLD    |
| What are the best treatments that cure or delay the progression (worsening) of autoimmune hepatitis (AIH)?                                       | None                                                                                                                                                 | 15 trials | Survival (1 trial), health-related quality of life (1 trial) <sup>e</sup>                         | High quality RCTs with clinical outcomes           |
| What are the best treatments that cure or delay the progression (worsening) of non-alcohol related steatohepatitis (NASH)?                       | The evidence related to this question is covered under non-alcohol related fatty liver disease by performing a subgroup analysis of people with NASH |           |                                                                                                   |                                                    |
| Prior to liver transplantation, is it better to transport the donor liver using a machine which pumps blood or                                   | None                                                                                                                                                 | 5 trials  | Overall survival (4 trials), graft                                                                | Await results of the RCTs                          |

|                                                                                                                                                                                                                                                                                                                                                                                  |                                                                                                                                                                                                                                                                                                                                           |           |                                                                                                                      |                                                                                                                                                |
|----------------------------------------------------------------------------------------------------------------------------------------------------------------------------------------------------------------------------------------------------------------------------------------------------------------------------------------------------------------------------------|-------------------------------------------------------------------------------------------------------------------------------------------------------------------------------------------------------------------------------------------------------------------------------------------------------------------------------------------|-----------|----------------------------------------------------------------------------------------------------------------------|------------------------------------------------------------------------------------------------------------------------------------------------|
| <p>1<br/>2<br/>3 preservation solution through the liver<br/>4 (machine perfusion) or is it better to<br/>5 transport it in the standard way of<br/>6 transporting it immersed in cold<br/>7 preservation solution (cold storage)?<br/>8<br/>9<br/>10<br/>11<br/>12<br/>13<br/>14<br/>15<br/>16<br/>17<br/>18<br/>19<br/>20<br/>21<br/>22<br/>23<br/>24<br/>25<br/>26<br/>27</p> |                                                                                                                                                                                                                                                                                                                                           |           | <p>survival (5<br/>trials),<br/>health-<br/>related<br/>quality of life<br/>(2 trials)</p>                           | <p>(all<br/>expected<br/>to<br/>complete<br/>by the end<br/>of 2019)<br/>and<br/>perform a<br/>high<br/>quality<br/>systematic<br/>review.</p> |
| <p>28 What are the best treatments that cure or<br/>29 delay the progression (worsening) of<br/>30 primary biliary cholangitis (PBC)?<br/>31<br/>32<br/>33<br/>34<br/>35<br/>36<br/>37<br/>38<br/>39<br/>40<br/>41<br/>42</p>                                                                                                                                                    | [13]                                                                                                                                                                                                                                                                                                                                      | 24 trials | <p>Health-<br/>related<br/>quality of life<br/>(5 trials),<br/>relief of<br/>symptoms (5<br/>trials)<sup>e</sup></p> | <p>High-<br/>quality<br/>RCTs with<br/>clinical<br/>outcomes</p>                                                                               |
| <p>43 Are there any treatments that reverse the<br/>44 liver damage in primary sclerosing<br/>45 cholangitis (PSC)?<br/>46<br/>47<br/>48<br/>49<br/>50<br/>51<br/>52<br/>53<br/>54<br/>55<br/>56<br/>57<br/>58<br/>59<br/>60</p>                                                                                                                                                 | <p>The evidence related to this question is covered under treatments for primary sclerosing cholangitis. The systematic review did not include fibrosis as one of the outcomes. Nine of the trials included in the systematic review reported on fibrosis. Two of the trials not included in the systematic review (and listed above)</p> |           |                                                                                                                      |                                                                                                                                                |

|  |                             |
|--|-----------------------------|
|  | reported on liver fibrosis. |
|--|-----------------------------|

234

235 a Numbers indicate the reference number.

236 b Further well-designed randomised controlled trials using clinical outcomes were recommended by

237 all these systematic reviews.

238 c Ongoing trials, unpublished trials, or trials published since the search date for the systematic

239 review when a high-quality systematic review based on randomised controlled trials exists. If no

240 systematic reviews based on randomised controlled trials exist, these are either published trials or

241 ongoing studies.

242 d This information is reported to find out whether the important patient-oriented outcomes are

243 reported in the trials not covered by high-quality systematic reviews. This is to help with deciding

244 whether new randomised controlled trials are necessary on the topic.

245 e The remaining trials reported treatment-related adverse events, composite outcomes and

246 surrogate markers.

247

248 The complete list of questions in the Delphi process, the proportion of respondents who

249 considered a research question as very important and the summary scores in each Delphi round is

250 available in Online Supplement Appendix 4.

251 **DISCUSSION**

252 This is the first priority setting partnership on non-alcohol related liver and gallbladder disorders.

253 This included a wide range of disease processes and a total of 428 unique research questions that

254 met the scope of this priority setting partnership were identified. All the research questions were

255 considered unanswered as there had been no high quality systematic reviews which indicated that

256 no further research is required, i.e. all the research questions were uncertainties. Consensus that an

1  
2  
3 257 uncertainty was a very important research priority was reached for six research questions. Four  
4  
5 258 additional research questions with the highest proportion of Delphi panel members ranking the  
6  
7 259 question as highly important were added to constitute the top 10 research priorities.  
8  
9

10 260 As evident from the online supplement Appendix 1, longevity of life and health-related  
11  
12 261 quality of life are two major outcomes that appear important to patients, their carers, and  
13  
14 262 healthcare professionals. However, even when there are ongoing trials, it appears that the outcomes  
15  
16 263 in those trials will not address the outcomes listed in eight of the top 10 research questions (Table  
17  
18 264 2). Therefore, the next step in addressing these uncertainties is the design and conduct of  
19  
20 265 randomised controlled trials. Such randomised controlled trials may involve qualitative studies to  
21  
22 266 determine the design and should compare the treatments that improve the longevity of life and/or  
23  
24 267 health-related quality of life.  
25  
26

27 268 It should be noted that uncertainties ‘what are the best treatments that cure or delay the  
28  
29 269 progression (worsening) of non-alcohol-related fatty liver disease (NAFLD)?’ and ‘what are the best  
30  
31 270 treatments that cure or delay the progression (worsening) of non-alcohol related steatohepatitis  
32  
33 271 (NASH)?’ are related to each other. Although NAFLD includes NASH, most of the panel members felt  
34  
35 272 that the research questions related to NAFLD and NASH should be kept separate uncertainties.  
36  
37 273 While the same systematic review can cover both the uncertainties, the primary research study  
38  
39 274 designed to address these two questions differ in terms of the setting, the outcomes used, and the  
40  
41 275 period of follow-up. Any primary research that tries to answer these two questions in a single  
42  
43 276 randomised controlled trial will be inefficient.  
44  
45

46 277 Similarly, for the uncertainties ‘what are the best treatments that cure or delay the  
47  
48 278 progression (worsening) of primary sclerosing cholangitis (PSC)’ and ‘are there any treatments that  
49  
50 279 reverse the liver damage in primary sclerosing cholangitis (PSC)?’, a single randomised controlled  
51  
52 280 trial will be inefficient and the preference of most of the panel members was to keep these  
53  
54 281 uncertainties as separate uncertainties.  
55  
56  
57  
58  
59  
60

1  
2  
3 282           There are several limitations to our priority setting process. The first one is deviation from  
4  
5 283   the original protocol. To select the final top priorities, the initial plan was to arrive at consensus by  
6  
7 284   open small group and large group discussions of patients, carers, and healthcare professionals as  
8  
9 285   suggested by the standard James-Lind Alliance process [6], which provides an opportunity for a  
10  
11 286   knowledge exchange of viewpoints and experience. However, part of the steering committee with  
12  
13 287   experience in a similar priority setting partnership felt that open discussions resulted in ‘loud voices’  
14  
15 288   being given more importance resulting in an unrepresentative list of top priorities. While this can be  
16  
17 289   mitigated by facilitated group discussions by neutral JLA facilitators to ensure that all voices were  
18  
19 290   heard in the discussions, this was considered by the steering committee as an important source of  
20  
21 291   bias based on their prior experience in participating in open discussions. The steering committee  
22  
23 292   therefore decided to follow the Delphi-consensus method which is one of the major consensus  
24  
25 293   methods[8]. The advantages of Delphi-consensus method over open discussions include anonymity  
26  
27 294   of the response and the equal weight given to the opinions of all members [8]. In addition, they are  
28  
29 295   less costly to conduct without any limitation by geographical location compared to other methods of  
30  
31 296   consensus[8] because of the lack of necessity to travel and take time off regular work. However,  
32  
33 297   there is considerable variability in the previous performance of Delphi processes with regards to the  
34  
35 298   number of rounds and the criteria for achieving consensus [14]. Arriving at consensus depends upon  
36  
37 299   people revising their scores based on the other’s scores. Our initial plan was to extend the Delphi to  
38  
39 300   four rounds if consensus on 10 top research priorities was not reached in three rounds. However,  
40  
41 301   there was minimal change in scores between the rounds for most questions (Online Supplement  
42  
43 302   Appendix 3) and the Delphi process was completed in three rounds. Consensus on a top research  
44  
45 303   priority was achieved for six questions only. However, the proportion of Delphi panel members  
46  
47 304   ranking a question as highly important was greater than 70% for the remaining four questions added  
48  
49 305   to the list of top research priorities. Previous Delphi consensus processes have used various cut-off  
50  
51 306   points for defining consensus: greater than 70% agreement among panel members is well within the  
52  
53 307   definition of consensus used in previous Delphi consensus processes [14].  
54  
55  
56  
57  
58  
59  
60

1  
2  
3 308 The other major limitation of our priority setting process is the representativeness of the  
4  
5 309 people who completed the survey and took part in the Delphi process. The online survey was shared  
6  
7 310 among clinicians and members of general and disease-specific patient organisations. Most questions  
8  
9 311 resulting from the online survey relate to chronic liver disease (in particular, autoimmune liver  
10  
11 312 diseases), perhaps reflecting the high motivation to support research from those groups. The Delphi  
12  
13 313 panel also had a high representation of people related to chronic liver disease (in particular,  
14  
15 314 autoimmune liver diseases) as patients, carers, or healthcare professionals. Whilst people affected  
16  
17 315 by different liver and gallbladder disorders were actively sought through both general and disease-  
18  
19 316 specific patient support groups and organisations, only a few responded and completed all three  
20  
21 317 rounds of the Delphi process. The potential bias towards prioritising chronic liver diseases is evident  
22  
23 318 as nine of the top 10 research priorities relate to chronic liver diseases (four relate to autoimmune  
24  
25 319 liver diseases, three related to non-alcohol related fatty liver disease, two related to liver  
26  
27 320 transplantation). It was surprising that the uncertainties related to the treatment of chronic viral  
28  
29 321 diseases such as chronic hepatitis B and chronic hepatitis C were not identified within the top 10  
30  
31 322 research priorities. This may be because of the perception by the some of the panel members that  
32  
33 323 the research questions related to the treatment of chronic hepatitis C were answered with the  
34  
35 324 advent of directly acting antivirals (personal communication). The reason for non-prioritisation of  
36  
37 325 chronic hepatitis B is not entirely clear. This may be because chronic hepatitis B may not have been  
38  
39 326 considered as important as other chronic liver diseases or under-representation of chronic hepatitis  
40  
41 327 B in the panel.

42  
43  
44  
45 328 Cancer-related questions, childhood-related liver diseases, and other benign disorders did  
46  
47 329 not end up in the top research priorities (except for the treatment of very early hepatocellular  
48  
49 330 carcinoma, which is managed by hepatologists and surgeons) probably for the reasons described  
50  
51 331 above. We recommend that separate prioritisation processes are carried out for people with  
52  
53 332 gallstones, a condition that affects approximately 5% to 25% of the population [15], for people with  
54  
55 333 primary and secondary liver cancer, and childhood liver disorders where significant uncertainties

1  
2  
3 334 remain on the effectiveness of different treatments in decreasing mortality and improving health-  
4  
5 335 related quality of life.  
6

7  
8 336 As well as the above limitation, we are aware of the inherent limitations of using solely  
9  
10 337 technology to carry out the Delphi exercise. These are limitations that can potentially lead to bias in  
11  
12 338 any consensus-building method including that of face-to-face consensus methods normally used in a  
13  
14 339 JLA PSP.  
15

16  
17 340 One solution which might address the limitations of this priority setting process and the  
18  
19 341 standard JLA process may be to collect information routinely from patients visiting hospitals using  
20  
21 342 paper forms and conduct online meetings (video conferencing and presentation) before the final  
22  
23 343 round of the Delphi (or the standard face-to-face priority setting workshop used by the JLA. Some  
24  
25 344 JLA PSPs do use methods such as face-to face interviews and group discussions rather than solely  
26  
27 345 online surveys). By collecting information on paper forms and conducting the meetings in hospitals,  
28  
29 346 it is possible to engage with people who do not have access to or are not familiar with computers. It  
30  
31 347 is also possible to engage with people who have concerns regarding data confidentiality with the use  
32  
33 348 of computers or social media by collecting information using paper forms. Ethical and confidentiality  
34  
35 349 issues will need to be considered prior to engaging patients attending hospital in the research  
36  
37 350 prioritisation process.  
38

39  
40 351 Another limitation of our priority setting process is the drop-outs during the Delphi process.  
41  
42 352 While some of the drop-outs may be related to the ability to complete online surveys and use  
43  
44 353 Microsoft Excel, some patient representatives or clinicians may have dropped out because they did  
45  
46 354 not find any research question to be of direct relevance to them. Other reasons include lack of  
47  
48 355 understanding of the conditions, feeling that the process was too complicated, feeling that the  
49  
50 356 process would not work, and the time commitment for the process. This is because of the broad  
51  
52 357 scope of this research prioritisation process and may be overcome by choosing a narrower focus  
53  
54  
55  
56  
57  
58  
59  
60



1  
2  
3 358 while defining the scope of the prioritisation process, and by better explanation of the disease  
4  
5 359 processes through presentations.  
6

7  
8 360 It should also be recognised that the Delphi panel was constituted of representatives from  
9  
10 361 England, Scotland, and Wales. Therefore, the findings are applicable in only these countries.

11 362 However, the findings are likely to be applicable throughout the NHS and in other European and  
12  
13 363 Western countries with a similar spectrum of chronic liver diseases and similar treatment options  
14  
15 364 available.  
16  
17

18  
19 365 In summary, there are significant uncertainties in the management of liver and gallbladder  
20  
21 366 disorders. Further high-quality research is necessary to address these uncertainties which may  
22  
23 367 require programmes of basic, translational, clinical, and public health research. For issues with  
24  
25 368 diverse and unproven treatment options, randomised controlled trials may be the only mechanism  
26  
27 369 for identifying the most effective treatment and the treatments that represent good value for  
28  
29 370 money for the NHS. Such randomised controlled trials should assess the effect of different  
30  
31 371 treatments in improving longevity of life and/or health-related quality of life.  
32  
33

## 34 372 **ACKNOWLEDGEMENTS**

35  
36  
37 373 We thank Mr Andrew Langford, previous Chief Executive of British Liver Trust, participants in the  
38  
39 374 survey, Ms Caroline Whiting and Ms Beccy Maeso, JLA PSP co-ordinators for their advice on the  
40  
41 375 process and comments on the manuscript, and the Delphi panel members who preferred to remain  
42  
43 376 anonymous in contributing to this research prioritisation process.  
44  
45

## 46 377 **FUNDING**

47  
48  
49 378 There was no external funding.  
50  
51  
52  
53  
54  
55  
56  
57  
58  
59  
60

## 379 CONTRIBUTION OF AUTHORS

380 Kurinchi Gurusamy – conceptualisation, healthcare professional and methodological lead of steering  
381 committee, Delphi panel member, analysis, **author** of the manuscript.

382 Martine Walmsley – Patients and carers lead of steering committee, Delphi panel member

383 Brian Davidson, Claire Frier, Barry Fuller, Angela Madden, Steven Masson, Ivana Safarik, Emmanouil

384 Tsochatzis – Steering committee, Delphi panel member, suggested revisions to the manuscript

385 Richard Morley – Steering committee, JLA advisor

386 Irfan Ahmed, Maxine Cowlin, John Dillon, Graham Ellicott, Ahmed Elsharkawy, Liz Farrington,

387 Anthony Glachan, Nagappan Kumar, EJ Milne, Simon Rushbrook, Amanda Smith, Lizzie Stafford,

388 Andrew Yeoman – Delphi panel member, suggested revisions to the manuscript

## 389 CONFLICTS OF INTEREST

390 The decisions made by healthcare professionals involved in the research prioritisation process might  
391 have been influenced by their professional interests, in addition to their own, or family member's  
392 experience of health conditions. Decisions made by patients and carers in the research prioritisation  
393 process might have been influenced by their particular experiences, health needs and interests.

## 394 DATA SHARING AGREEMENT

395 All data is available in the manuscript or in the supplementary file.

## 396 FIGURE 1

### 397 Research prioritisation steps

398 The major steps in the research prioritisation are shown in the figure.

399 <sup>a</sup>The protocol was registered with James-Lind Alliance Priority Setting Partnership

1  
2  
3 400 <sup>b</sup>The final prioritisation was achieved by modified Delphi consensus method.  
4  
5

## 6 401 REFERENCES

- 7  
8  
9 402 1. Chalmers I. Confronting therapeutic ignorance. *BMJ* 2008;337:a841. doi:  
10 403 10.1136/bmj.39555.392627.80 [published Online First: 2008/07/18]  
11  
12  
13 404 2. James Lind Alliance Priority Setting Partnerships. About the James Lind Alliance.  
14  
15 405 <http://www.jla.nihr.ac.uk/about-the-james-lind-alliance/> (accessed 6th April 2018) 2018  
16  
17 406 3. Crowe S, Fenton M, Hall M, et al. Patients', clinicians' and the research communities' priorities for  
18  
19 407 treatment research: there is an important mismatch. *Research Involvement and Engagement*  
20  
21 408 2015;1(1):2. doi: 10.1186/s40900-015-0003-x  
22  
23 409 4. Tallon D, Chard J, Dieppe P. Relation between agendas of the research community and the  
24  
25 410 research consumer. *The Lancet*;355(9220):2037-40. doi: 10.1016/S0140-6736(00)02351-5  
26  
27 411 5. James Lind Alliance Priority Setting Partnerships. Alcohol-related liver disease.  
28  
29 412 <http://www.jla.nihr.ac.uk/priority-setting-partnerships/alcohol-related-liver-disease/>  
30  
31 413 (accessed 6th April 2018) 2018  
32  
33 414 6. James Lind Alliance Priority Setting Partnerships. JLA guidebook. [http://www.jla.nihr.ac.uk/jla-](http://www.jla.nihr.ac.uk/jla-guidebook/)  
34  
35 415 [guidebook/](http://www.jla.nihr.ac.uk/jla-guidebook/) (accessed 6th April 2018) 2018  
36  
37 416 7. PSC Support. Welcome to PSC Support, dedicated to helping people affected by primary sclerosing  
38  
39 417 cholangitis. <https://www.pscsupport.org.uk/> (accessed 6th April 2018) 2018  
40  
41 418 8. Jones J, Hunter D. Consensus methods for medical and health services research. *BMJ*  
42  
43 419 1995;311(7001):376-80.  
44  
45 420 9. Majumdar A, Roccarina D, Thorburn D, et al. Management of people with early- or very early-  
46  
47 421 stage hepatocellular carcinoma: an attempted network meta-analysis. *The Cochrane*  
48  
49 422 *database of systematic reviews* 2017;3:CD011650. doi: 10.1002/14651858.CD011650.pub2  
50  
51 423 [published Online First: 2017/03/30]  
52  
53  
54  
55  
56  
57  
58  
59  
60

- 1  
2  
3 424 10. Saffioti F, Gurusamy KS, Hawkins N, et al. Pharmacological interventions for primary sclerosing  
4  
5 425 cholangitis: an attempted network meta-analysis. *The Cochrane database of systematic*  
6  
7 426 *reviews* 2017;3:CD011343. doi: 10.1002/14651858.CD011343.pub2 [published Online First:  
8  
9 427 2017/04/19]
- 10  
11 428 11. Lombardi R, Onali S, Thorburn D, et al. Pharmacological interventions for non-alcohol related  
12  
13 429 fatty liver disease (NAFLD): an attempted network meta-analysis. *The Cochrane database of*  
14  
15 430 *systematic reviews* 2017;3:CD011640. doi: 10.1002/14651858.CD011640.pub2 [published  
16  
17 431 Online First: 2017/03/31]
- 18  
19 432 12. Rodriguez-Peralvarez M, Guerrero-Misas M, Thorburn D, et al. Maintenance immunosuppression  
20  
21 433 for adults undergoing liver transplantation: a network meta-analysis. *The Cochrane database*  
22  
23 434 *of systematic reviews* 2017;3:CD011639. doi: 10.1002/14651858.CD011639.pub2 [published  
24  
25 435 Online First: 2017/04/01]
- 26  
27 436 13. Saffioti F, Gurusamy KS, Eusebi LH, et al. Pharmacological interventions for primary biliary  
28  
29 437 cholangitis: an attempted network meta-analysis. *The Cochrane database of systematic*  
30  
31 438 *reviews* 2017;3:CD011648. doi: 10.1002/14651858.CD011648.pub2 [published Online First:  
32  
33 439 2017/03/30]
- 34  
35 440 14. Diamond IR, Grant RC, Feldman BM, et al. Defining consensus: a systematic review recommends  
36  
37 441 methodologic criteria for reporting of Delphi studies. *J Clin Epidemiol* 2014;67(4):401-9. doi:  
38  
39 442 10.1016/j.jclinepi.2013.12.002 [published Online First: 2014/03/04]
- 40  
41 443 15. Gurusamy KS, Davidson BR. Gallstones. *BMJ* 2014;348:g2669. doi: 10.1136/bmj.g2669  
42  
43  
44  
45  
46 444  
47  
48  
49  
50  
51  
52  
53  
54  
55  
56  
57  
58  
59  
60

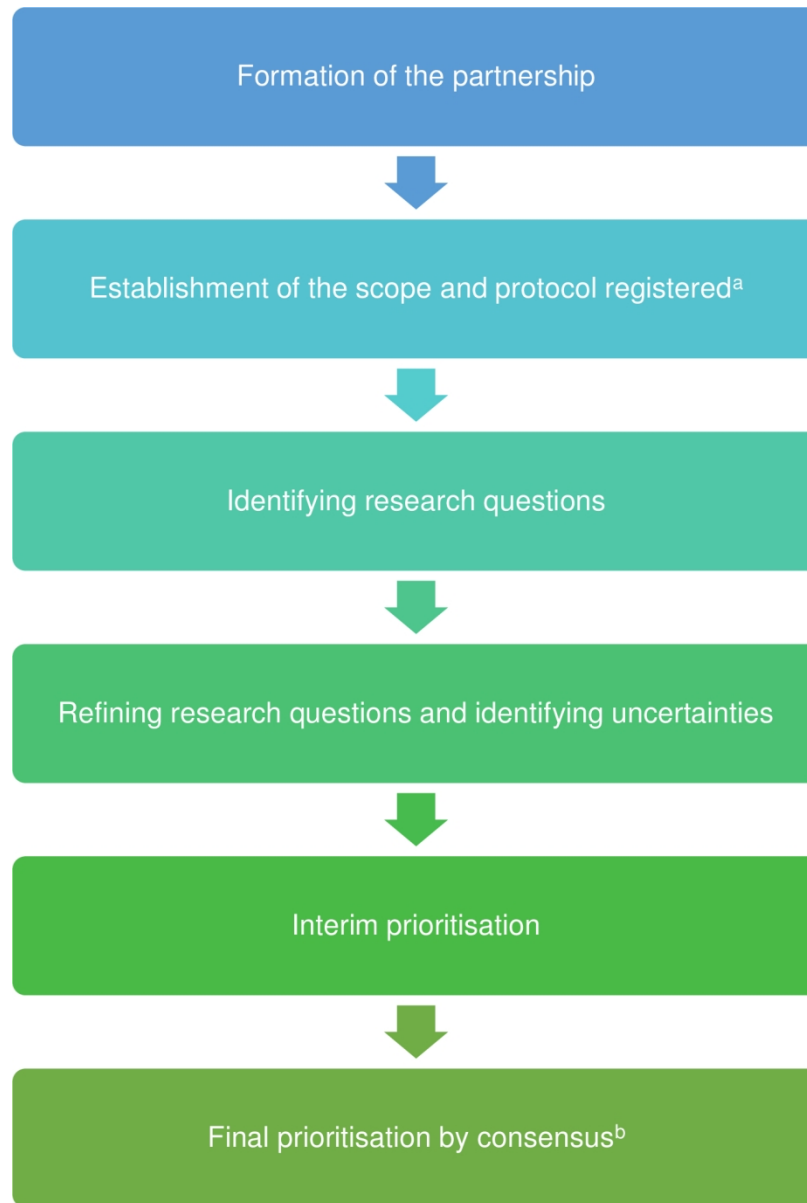

Figure 1: Research prioritisation steps

The major steps in the research prioritisation are shown in the figure.  
aThe protocol was registered with James-Lind Alliance Priority Setting Partnership  
bThe final prioritisation was achieved by modified Delphi consensus method.

119x177mm (300 x 300 DPI)

## Appendix 1 List of all research questions

| Patient/population                               | Intervention                                 | Control         | Outcomes                                                                                                                                                                               |
|--------------------------------------------------|----------------------------------------------|-----------------|----------------------------------------------------------------------------------------------------------------------------------------------------------------------------------------|
| People with obesity                              | Lifestyle: diet                              | No intervention | <ol style="list-style-type: none"> <li>1. Liver transplantation</li> <li>2. Improvement in BMI.</li> <li>3. Improved liver function</li> </ol>                                         |
| People with liver disease                        | Nurse-led care                               | Standard care   | Ability to self-manage                                                                                                                                                                 |
| People with asymptomatic chronic liver disease   | Education of people                          | No intervention | <ol style="list-style-type: none"> <li>1. Improvement in life style.</li> <li>2. Fatty liver disease</li> </ol>                                                                        |
| People with NASH (non-alcoholic steatohepatitis) | Different medical treatments                 | No intervention | <ol style="list-style-type: none"> <li>1. Halting disease progression.</li> <li>2. Reversing disease progression.</li> <li>3. Slowing disease progression.</li> <li>4. Cure</li> </ol> |
| People with primary sclerosing cholangitis       | Treatment for primary sclerosing cholangitis | No intervention | <ol style="list-style-type: none"> <li>1. Mortality</li> <li>2. HRQoL (health-related quality of life)</li> </ol>                                                                      |

1  
2  
3  
4  
5  
6  
7  
8  
9  
10  
11  
12  
13  
14  
15  
16  
17  
18  
19  
20  
21  
22  
23  
24  
25  
26  
27  
28  
29  
30  
31  
32  
33  
34  
35  
36  
37  
38  
39  
40  
41  
42  
43  
44  
45  
46  
47  
48  
49  
50  
51  
52  
53  
54  
55  
56  
57  
58  
59  
60

For peer review only

|                           |                                                                    |                |                                                                                                                                                                                                                                                                                                                                                         |
|---------------------------|--------------------------------------------------------------------|----------------|---------------------------------------------------------------------------------------------------------------------------------------------------------------------------------------------------------------------------------------------------------------------------------------------------------------------------------------------------------|
|                           |                                                                    |                | <p>3. Fewer symptoms - pain, itching, fatigue</p> <p>4. improved liver function</p> <p>5. Cure</p> <p>6. Time to liver transplantation</p> <p>7. Improvement (no further details)</p> <p>8. Decreased hospital admission</p> <p>9. Disease progression</p> <p>10. Remission from PSC</p> <p>11. Cancer</p> <p>12. Requirement for liver transplant.</p> |
| People with liver disease | Methods to improve compliance to treatment                         | Not applicable | <p>1. HRQoL</p> <p>2. Mortality</p>                                                                                                                                                                                                                                                                                                                     |
| General population        | Screening: early identification of people at risk of liver disease | No screening   | <p>1. HRQoL</p> <p>2. Mortality</p>                                                                                                                                                                                                                                                                                                                     |

|                                                                                                                                                                                                                                                                                                                                                                                      |                                                                     |                       |                                                                                                                                                                                                            |
|--------------------------------------------------------------------------------------------------------------------------------------------------------------------------------------------------------------------------------------------------------------------------------------------------------------------------------------------------------------------------------------|---------------------------------------------------------------------|-----------------------|------------------------------------------------------------------------------------------------------------------------------------------------------------------------------------------------------------|
| <p>1<br/>2<br/>3<br/>4<br/>5<br/>6<br/>7<br/>8<br/>9<br/>10<br/>11<br/>12<br/>13<br/>14<br/>15<br/>16<br/>17<br/>18<br/>19<br/>20<br/>21<br/>22<br/>23<br/>24<br/>25<br/>26<br/>27<br/>28<br/>29</p> <p>People at risk of liver disease</p>                                                                                                                                          | <p>Diagnosis: early identification of people with liver disease</p> | <p>Not applicable</p> | <p>1. HRQoL<br/>2. Mortality<br/>3. Prevention of liver disease<br/>4. Slowing progression of liver disease<br/>5. Reducing requirement for liver transplantation<br/>6. Adverse events of medications</p> |
| <p>30<br/>31<br/>32<br/>33<br/>34<br/>35<br/>36<br/>37<br/>38<br/>39<br/>40<br/>41<br/>42<br/>43<br/>44<br/>45<br/>46<br/>47<br/>48<br/>49<br/>50<br/>51<br/>52<br/>53<br/>54<br/>55<br/>56<br/>57<br/>58<br/>59<br/>60</p> <p>People with primary sclerosing cholangitis and who have had a liver transplant and still have ulcerative colitis even after a sub total colectomy</p> | <p>Symptomatic treatment for primary sclerosing cholangitis</p>     | <p>Not applicable</p> | <p>1. HRQoL.<br/>2. Decrease in symptoms (breathlessness and fatigue).<br/>3. Mortality.<br/>4. Decrease in medication.<br/>5. Cure.<br/>6. Decreased progression of primary sclerosing cholangitis.</p>   |



|                                                       |                                                                                      |                |                                                                                                                                                                                                                                                 |
|-------------------------------------------------------|--------------------------------------------------------------------------------------|----------------|-------------------------------------------------------------------------------------------------------------------------------------------------------------------------------------------------------------------------------------------------|
|                                                       |                                                                                      |                | 7. Improvement in symptoms (unspecified).                                                                                                                                                                                                       |
| People at risk of liver disease (overweight or obese) | Diagnosis: Accurate non-invasive method for diagnosis of chronic liver disease       | Not applicable | <ol style="list-style-type: none"> <li>1. Death</li> <li>2. Need for liver transplant</li> <li>3. Requirement for hospital admission.</li> <li>4. Demonstrating equivalence to biopsy</li> <li>5. Demonstrating good reproducibility</li> </ol> |
| People at risk of liver disease (overweight or obese) | Screening methods to diagnose liver disease (including history and diagnostic tests) | Not applicable | <ol style="list-style-type: none"> <li>1. Proportion of people at risk of liver disease</li> <li>2. Proportion of people at risk who have asymptomatic liver fibrosis</li> <li>3. Early diagnosis and treatment</li> </ol>                      |
| People with polycystic liver disease                  | Treatment for polycystic disease                                                     | Not applicable | <ol style="list-style-type: none"> <li>1. Decrease symptoms</li> <li>2. Increase quality of</li> </ol>                                                                                                                                          |

|                                         |                                             |                       |                                                                                                                                                                                                                                                                                                                                                               |
|-----------------------------------------|---------------------------------------------|-----------------------|---------------------------------------------------------------------------------------------------------------------------------------------------------------------------------------------------------------------------------------------------------------------------------------------------------------------------------------------------------------|
|                                         |                                             |                       | <p>life</p> <p>3. Decrease size of cyst or preventing cysts to enlarge</p> <p>4. Increased longevity</p> <p>5. Requirement for liver transplant.</p>                                                                                                                                                                                                          |
| <p>People with autoimmune hepatitis</p> | <p>Treatments for autoimmune hepatitis.</p> | <p>Not applicable</p> | <p>1. HRQoL (including ability to carry out normal activities, study, work).</p> <p>2. Fatigue.</p> <p>3. Osteoporosis (treatment-related).</p> <p>4. Cataracts (treatment-related).</p> <p>5. Infections (treatment-related).</p> <p>6. Weight gain (treatment-related).</p> <p>7. Treatment related side-effects (unspecified).</p> <p>8. Brittle teeth</p> |

1  
2  
3  
4  
5  
6  
7  
8  
9  
10  
11  
12  
13  
14  
15  
16  
17  
18  
19  
20  
21  
22  
23  
24  
25  
26  
27  
28  
29  
30  
31  
32  
33  
34  
35  
36  
37  
38  
39  
40  
41  
42  
43  
44  
45  
46  
47  
48  
49  
50  
51  
52  
53  
54  
55  
56  
57  
58  
59  
60

|                                         |                                   |                      |                                                                                                                                                                                                                                                                                                                                                                                                                                                      |
|-----------------------------------------|-----------------------------------|----------------------|------------------------------------------------------------------------------------------------------------------------------------------------------------------------------------------------------------------------------------------------------------------------------------------------------------------------------------------------------------------------------------------------------------------------------------------------------|
|                                         |                                   |                      | <p>(treatment-related).</p> <p>9. More effective treatment unspecified.</p> <p>10. Complete recovery (unspecified).</p> <p>11. Mortality.</p> <p>12. Measure feeling well (unspecified)</p> <p>13. Fewer flare ups</p> <p>14. Less joint pain.</p> <p>15. Disability</p> <p>16. Liver damage requiring hospital admission</p> <p>17. Quicker recovery</p> <p>18. More monitoring of patients</p> <p>19. Symptom control.</p> <p>20. Side-effects</p> |
| <p>People with autoimmune hepatitis</p> | <p>Standardised protocol care</p> | <p>Standard care</p> | <p>1. HRQoL.</p> <p>2. Fatigue.</p> <p>3. Osteoporosis</p>                                                                                                                                                                                                                                                                                                                                                                                           |

For peer review only

|                                         |                                                                         |                       |                                                                                                                                                                                                                                                                                                          |
|-----------------------------------------|-------------------------------------------------------------------------|-----------------------|----------------------------------------------------------------------------------------------------------------------------------------------------------------------------------------------------------------------------------------------------------------------------------------------------------|
|                                         |                                                                         |                       | <p>(treatment-related).</p> <p>4. Cataracts</p> <p>(treatment-related).</p> <p>5. Infections</p> <p>(treatment-related).</p> <p>6. Weight gain</p> <p>(treatment-related).</p>                                                                                                                           |
| <p>People with autoimmune hepatitis</p> | <p>Treatment of fatigue/joint pain related to autoimmune hepatitis.</p> | <p>Not applicable</p> | <p>1. HRQoL.</p> <p>2. Fatigue.</p> <p>3. Osteoporosis</p> <p>(treatment-related).</p> <p>4. Cataracts</p> <p>(treatment-related).</p> <p>5. Infections</p> <p>(treatment-related).</p> <p>6. Weight gain</p> <p>(treatment-related).</p> <p>7. Joint pain.</p> <p>8. Symptoms</p> <p>(unspecified).</p> |
| <p>People with autoimmune hepatitis</p> | <p>Nurse-led care</p>                                                   | <p>Standard care</p>  | <p>1. Faster recovery.</p> <p>2. HRQoL.</p> <p>3. Symptoms.</p>                                                                                                                                                                                                                                          |

|                                                                                                                                                                                              |                                  |                                                    |               |                                                                                                                                                                                                                                         |
|----------------------------------------------------------------------------------------------------------------------------------------------------------------------------------------------|----------------------------------|----------------------------------------------------|---------------|-----------------------------------------------------------------------------------------------------------------------------------------------------------------------------------------------------------------------------------------|
| 1<br>2<br>3<br>4<br>5<br>6<br>7<br>8<br>9<br>10<br>11                                                                                                                                        | People with autoimmune hepatitis | Education of healthcare professionals and patients | Standard care | 1. Faster recovery.<br>2. HRQoL.<br>3. Symptoms.                                                                                                                                                                                        |
| 12<br>13<br>14<br>15<br>16<br>17<br>18<br>19<br>20<br>21<br>22<br>23<br>24<br>25<br>26<br>27<br>28<br>29<br>30<br>31<br>32<br>33<br>34<br>35<br>36<br>37<br>38<br>39<br>40<br>41<br>42<br>43 | People with autoimmune hepatitis | Lifestyle: diet                                    | Standard care | 1. Treatment related adverse events.<br>2. Requirements for liver transplantation.<br>3. NHS (National Health Service, UK) costs<br>4. HRQoL<br>5. Mortality.<br>6. Free from immunosuppressive therapies.<br>7. Fatigue.<br>8. Weight. |
| 44<br>45<br>46<br>47<br>48<br>49<br>50<br>51<br>52                                                                                                                                           | People with autoimmune hepatitis | Education of people                                | Standard care | Faster reduction in strong medications.<br>Need for liver transplantation.                                                                                                                                                              |
| 53<br>54<br>55<br>56<br>57<br>58<br>59<br>60                                                                                                                                                 | People with autoimmune hepatitis | Cannabis + standard care                           | Standard care | 1. Reduction in immunosuppressants.                                                                                                                                                                                                     |

|                                                                                                                                                                                             |                                                                                  |                        |                                                                                                                                                                                                                                                              |
|---------------------------------------------------------------------------------------------------------------------------------------------------------------------------------------------|----------------------------------------------------------------------------------|------------------------|--------------------------------------------------------------------------------------------------------------------------------------------------------------------------------------------------------------------------------------------------------------|
|                                                                                                                                                                                             |                                                                                  |                        | <p>2. Fatigue.</p> <p>3. Treatment related side effects such as serious infections, anxiety, depression, cancer, physical side effects.</p>                                                                                                                  |
| <p>General population (&gt; 40 years or &gt;50 years or middle-aged people, particularly overweight/obese and/or have type 2 diabetes and/or a family history of chronic liver disease)</p> | <p>Screening for liver disease by GP using routine blood tests/other methods</p> | <p>Standard care</p>   | <p>1. Earlier diagnosis and treatment.</p> <p>2. Preventing liver disease progressing to cirrhosis.</p> <p>3. More cost effective for NHS.</p> <p>4. Preventing the complications of chronic liver disease such as hepatocellular carcinoma and varices.</p> |
| <p>People with autoimmune hepatitis</p>                                                                                                                                                     | <p>Prednisolone</p>                                                              | <p>No intervention</p> | <p>1. Obesity.</p> <p>2. Osteoporosis.</p> <p>3. Insomnia.</p> <p>4. Hypertension.</p>                                                                                                                                                                       |

|                                                          |                                                                                       |                                                                 |                                                  |                                                |
|----------------------------------------------------------|---------------------------------------------------------------------------------------|-----------------------------------------------------------------|--------------------------------------------------|------------------------------------------------|
| 1<br>2<br>3<br>4<br>5<br>6<br>7<br>8<br>9                | People with genetic markers associated with autoimmune hepatitis.                     | Methods for prophylaxis                                         | No intervention                                  | Prevention of autoimmune hepatitis             |
| 10<br>11<br>12<br>13                                     | People with autoimmune hepatitis                                                      | Lifestyle: optimal physical exercise                            | Not applicable                                   | 1. Weight<br>2. Fatigue                        |
| 14<br>15<br>16<br>17<br>18                               | People with autoimmune hepatitis (stable)                                             | Nurse-led care                                                  | Standard care                                    | 1. Fatigue                                     |
| 19<br>20<br>21<br>22                                     | People with suspected autoimmune hepatitis                                            | Methods to make a quicker diagnosis                             | Not applicable                                   | 1. Earlier diagnosis                           |
| 23<br>24<br>25<br>26<br>27<br>28<br>29                   | People with NASH, diabetes, and gastroparesis                                         | Treatments for breathlessness and pain                          | Not applicable                                   | 1. Breathlessness and pain.                    |
| 30<br>31<br>32<br>33<br>34                               | People with NASH cirrhosis, diabetes, and anaemia                                     | Treatments                                                      | Not applicable                                   | HRQoL                                          |
| 35<br>36<br>37<br>38                                     | People with NASH cirrhosis, diabetes, and anaemia                                     | Education of people                                             | Standard care                                    | Better knowledge                               |
| 39<br>40<br>41                                           | General population                                                                    | Education of people                                             | Standard care                                    | Better knowledge                               |
| 42<br>43<br>44<br>45<br>46<br>47                         | People with NASH cirrhosis, diabetes, and anaemia                                     | Non-pharmacological treatments to decrease pain and depression  | Pharmacological interventions or no intervention | 1. Pain<br>2. Depression                       |
| 48<br>49<br>50<br>51<br>52<br>53<br>54<br>55<br>56<br>57 | People with suspected autoimmune diseases with potential to cause acute liver failure | Diagnosis of autoimmune diseases that cause acute liver failure | Not applicable                                   | Identification of specific autoimmune diseases |

|                                                                                                                                                                                                                                                   |                                                                              |                                                         |                                                                                                                                                                                                     |
|---------------------------------------------------------------------------------------------------------------------------------------------------------------------------------------------------------------------------------------------------|------------------------------------------------------------------------------|---------------------------------------------------------|-----------------------------------------------------------------------------------------------------------------------------------------------------------------------------------------------------|
| <p>1<br/>2<br/>3<br/>4<br/>5<br/>6<br/>7<br/>8<br/>9</p> <p>People with autoimmune diseases with potential to cause acute liver failure</p>                                                                                                       | <p>Prophylactic treatments</p>                                               | <p>Not applicable</p>                                   | <p>Prevent acute liver failure</p>                                                                                                                                                                  |
| <p>10<br/>11<br/>12<br/>13<br/>14<br/>15<br/>16<br/>17<br/>18<br/>19<br/>20<br/>21<br/>22<br/>23<br/>24<br/>25<br/>26<br/>27<br/>28<br/>29<br/>30<br/>31<br/>32<br/>33<br/>34<br/>35<br/>36</p> <p>People with primary sclerosing cholangitis</p> | <p>Lifestyle: diet (including alcohol consumption) and physical exercise</p> | <p>Not applicable</p>                                   | <p>1. Reduction in symptoms<br/>2. Overall health benefits (unspecified)<br/>3. Ability to return to useful occupation.<br/>4. Reduce medication.<br/>5. Reduce need for annual investigations.</p> |
| <p>37<br/>38<br/>39<br/>40</p> <p>People with primary sclerosing cholangitis</p>                                                                                                                                                                  | <p>Azathioprine</p>                                                          | <p>Other interventions</p>                              | <p>Treatment related adverse events</p>                                                                                                                                                             |
| <p>41<br/>42<br/>43<br/>44<br/>45<br/>46<br/>47<br/>48<br/>49<br/>50<br/>51<br/>52<br/>53<br/>54<br/>55<br/>56</p> <p>People with autoimmune hepatitis</p>                                                                                        | <p>Non-pharmacological treatments to treat autoimmune hepatitis</p>          | <p>Pharmacological interventions or no intervention</p> | <p>1. Reduction in symptoms<br/>2. HRQoL (including the ability to do everyday tasks/ back into education or employment)</p>                                                                        |



|                                                                                                                      |                                                                                  |                             |                                            |                                                                                                                                                                                                                                            |
|----------------------------------------------------------------------------------------------------------------------|----------------------------------------------------------------------------------|-----------------------------|--------------------------------------------|--------------------------------------------------------------------------------------------------------------------------------------------------------------------------------------------------------------------------------------------|
| 1<br>2<br>3<br>4<br>5<br>6<br>7<br>8<br>9                                                                            | People with primary sclerosing cholangitis                                       | Itching receptor blockers   | No intervention/<br>other<br>interventions | Reduction in itching                                                                                                                                                                                                                       |
| 10<br>11<br>12<br>13<br>14<br>15<br>16<br>17<br>18<br>19<br>20<br>21<br>22<br>23<br>24<br>25<br>26<br>27<br>28<br>29 | People with primary sclerosing cholangitis with and without Vitamin D deficiency | Vitamin D supplements       | Standard care                              | <ol style="list-style-type: none"> <li>1. Stop the progress of the disease.</li> <li>2. Fewer flare ups of inflammatory bowel disease and primary sclerosing cholangitis.</li> <li>3. Improve HRQoL</li> <li>4. Less depression</li> </ol> |
| 30<br>31<br>32<br>33<br>34<br>35<br>36                                                                               | People with primary sclerosing cholangitis and autoimmune hepatitis              | Ursodeoxycholic acid        | No intervention/<br>other<br>interventions | Reducing symptoms                                                                                                                                                                                                                          |
| 37<br>38<br>39<br>40<br>41<br>42<br>43                                                                               | People at risk of primary sclerosing cholangitis and autoimmune hepatitis        | Prophylactic treatments     | No intervention                            | Prevention of the condition                                                                                                                                                                                                                |
| 44<br>45<br>46<br>47                                                                                                 | People with autoimmune hepatitis                                                 | Non-steroidal interventions | Steroids                                   | Adverse events                                                                                                                                                                                                                             |
| 48<br>49<br>50<br>51<br>52<br>53<br>54<br>55<br>56<br>57<br>58<br>59<br>60                                           | People at risk of autoimmune liver diseases                                      | Prophylactic treatments     | Not applicable                             | Reduction in those getting advanced liver disorders                                                                                                                                                                                        |

|                                                                                                    |                                                            |                                            |                        |                                                                                                                                 |
|----------------------------------------------------------------------------------------------------|------------------------------------------------------------|--------------------------------------------|------------------------|---------------------------------------------------------------------------------------------------------------------------------|
| 1<br>2<br>3<br>4<br>5<br>6<br>7<br>8<br>9<br>10<br>11<br>12<br>13<br>14<br>15<br>16<br>17<br>18    | People with autoimmune liver diseases (20 to 30 years old) | Treatments                                 | Not applicable         | 1. Reduction in those getting advanced liver disorders.<br>2. Stabilisation of disorder.<br>3. Reduction in liver cancer rates. |
| 19<br>20<br>21<br>22<br>23<br>24<br>25                                                             | People with autoimmune liver diseases (> 30 years)         | Screening: Early diagnosis of liver cancer | No screening           | Early diagnosis of liver cancer                                                                                                 |
| 26<br>27<br>28<br>29<br>30<br>31<br>32<br>33<br>34                                                 | People with NASH and stroke                                | Nurse-led care                             | Standard care          | 1. Recovery time<br>2. Amount of recovery that is made                                                                          |
| 35<br>36<br>37<br>38                                                                               | People with haemochromatosis                               | Lifestyle: iron avoidance diet             | Traditional phlebotomy | Reduction in iron levels                                                                                                        |
| 39<br>40<br>41<br>42<br>43                                                                         | People with haemochromatosis                               | Acceleration of phlebotomy                 | Traditional phlebotomy | Reduction in iron levels                                                                                                        |
| 44<br>45<br>46<br>47<br>48<br>49<br>50<br>51<br>52<br>53<br>54<br>55<br>56<br>57<br>58<br>59<br>60 | People with NAFLD                                          | Nurse-led care                             | Standard care          | 1. Faster recovery.<br>2. Symptom relief (unspecified).<br>3. Prevention of more serious complications.<br>4. Patient education |

|                                                       |                                                   |                |                                                                                                                                                                                                                                    |
|-------------------------------------------------------|---------------------------------------------------|----------------|------------------------------------------------------------------------------------------------------------------------------------------------------------------------------------------------------------------------------------|
|                                                       |                                                   |                | <p>on diet and exercise to lose weight.</p> <p>5. Preventing progression into NASH and cirrhosis.</p> <p>6. Reducing symptoms of aching sides, leg weakness, sickness and nausea.</p> <p>7. Prevent heart attacks and strokes.</p> |
| People with NAFLD                                     | Treatments for pain                               | Not applicable | Reducing pain                                                                                                                                                                                                                      |
| People with NAFLD                                     | Treatments for itching                            | Not applicable | Reduction in itching                                                                                                                                                                                                               |
| People at risk of liver disease (overweight or obese) | Education of healthcare professionals about NAFLD | Standard care  | <p>1. Prevention of cirrhosis.</p> <p>2. Prevention of other related liver complications.</p> <p>3. Earlier diagnosis and treatment of liver diseases.</p> <p>4. Increased knowledge.</p>                                          |
| Midwives and healthcare professionals coming into     | Education of healthcare                           | Standard care  | 1. Prevention of cirrhosis.                                                                                                                                                                                                        |

|                                                          |                                    |                     |                                                                                                                                                                                               |
|----------------------------------------------------------|------------------------------------|---------------------|-----------------------------------------------------------------------------------------------------------------------------------------------------------------------------------------------|
| contact with children and young adults                   | professionals about liver disease  |                     | 2. Prevention of other related liver complications.                                                                                                                                           |
| People with chronic hepatitis C                          | Newer treatments                   | Older interventions | 1. Treatment-related complications<br>2. Ability to perform usual activities such as work, study, housework.<br>3. Severe liver damage requiring hospital admission.<br>4. Decreased anxiety. |
| New-borns                                                | Screening test for biliary atresia | No screening        | Earlier diagnosis and treatment                                                                                                                                                               |
| Children who have undergone liver transplantation        | Immunosuppressive regimens         | Not applicable      | Adverse events                                                                                                                                                                                |
| People with liver-related disorders                      | Treatment for itching              | Not applicable      | Reduction or eradication of itching                                                                                                                                                           |
| People with primary biliary cholangitis                  | Education of people                | Standard care       | Knowledge                                                                                                                                                                                     |
| People with positive AMA (antimitochondrial antibody) M2 | Prophylactic treatments            | Not applicable      | 1. Prevention of primary biliary cholangitis.                                                                                                                                                 |

|                             |                                  |               |                                                                                                                                                                    |
|-----------------------------|----------------------------------|---------------|--------------------------------------------------------------------------------------------------------------------------------------------------------------------|
|                             |                                  |               | 2. Reversion to a negative AMA M2 before cirrhosis develops.                                                                                                       |
| People with positive AMA M2 | Standardised protocol care by GP | Standard care | 1. Prevention of primary biliary cholangitis.<br>2. Reversion to a negative AMA M2 before cirrhosis develops.                                                      |
| People with liver disease   | Stem cell therapy                | Standard care | 1. Mortality<br>2. HRQoL (including ability to carry out normal activities including study and work)<br>3. Prolonging periods of remission<br>4. Reducing symptoms |
| People with liver disease   | Bio-artificial livers            | Standard care | 1. Mortality<br>2. HRQoL (including ability to carry out normal activities                                                                                         |

|                                                                                |                                       |                                            |                                                                                                                 |
|--------------------------------------------------------------------------------|---------------------------------------|--------------------------------------------|-----------------------------------------------------------------------------------------------------------------|
|                                                                                |                                       |                                            | including study and work)                                                                                       |
| People with autoimmune hepatitis                                               | Targeted therapy against autoimmunity | Standard care                              | 1. Mortality<br>2. HRQoL (including ability to carry out normal activities including study and work)            |
| People with primary biliary cholangitis not responding to ursodeoxycholic acid | Different treatments                  | Not applicable                             | 1. Cure<br>2. Slowing of disease<br>3. Improved quality of life with respect to fatigue.                        |
| People with primary biliary cholangitis                                        | Antiviral treatment                   | No intervention/<br>other<br>interventions | 1. Improvement in health (unspecified)<br>2. Mortality                                                          |
| People with primary biliary cholangitis                                        | Treatment for itching and fatigue     | Not applicable                             | 1. HRQoL.<br>2. Anxiety.<br>3. Itching.<br>4. Fatigue.<br>5. Cure<br>6. Slowing of disease<br>7. Symptom relief |
| People with primary biliary cholangitis                                        | Greater patient involvement           | Standard care                              | 1. HRQoL.<br>2. Anxiety.                                                                                        |

|                                                                                  |                                                                               |                                                                                                                          |                                      |                                                                                  |
|----------------------------------------------------------------------------------|-------------------------------------------------------------------------------|--------------------------------------------------------------------------------------------------------------------------|--------------------------------------|----------------------------------------------------------------------------------|
| 1<br>2<br>3<br>4<br>5<br>6<br>7<br>8<br>9<br>10<br>11<br>12<br>13                | People with liver and gallbladder disorders                                   | Nurse-led care                                                                                                           | Standard care                        | 1. Symptoms.<br>2. Pain relief.<br>3. Quicker investigative measures.            |
| 14<br>15<br>16<br>17<br>18<br>19<br>20<br>21<br>22<br>23<br>24<br>25<br>26<br>27 | People with pain after cholecystectomy (especially elderly and living alone)  | Hospital based investigations to find the cause of pain, treatment of the cause of pain and discharged after pain relief | Symptomatic outpatient intervention  | Pain relief                                                                      |
| 28<br>29<br>30<br>31<br>32<br>33<br>34                                           | People with chronic hepatitis C                                               | Ribavirin                                                                                                                | No intervention/ other interventions | Osteoporosis                                                                     |
| 35<br>36<br>37<br>38<br>39<br>40                                                 | People with chronic hepatitis C taking ribavirin                              | Prophylactic treatments for osteoporosis                                                                                 | No prophylactic intervention         | Osteoporosis                                                                     |
| 41<br>42<br>43<br>44<br>45<br>46<br>47<br>48<br>49<br>50<br>51<br>52             | Healthcare professionals dealing with people with primary biliary cholangitis | Education of healthcare professionals about childhood liver disorders                                                    | Standard care                        | 1. Knowledge<br>2. Better treatment of patients with primary biliary cholangitis |
| 53<br>54<br>55<br>56<br>57<br>58<br>59<br>60                                     | People with liver disease                                                     | Education of people                                                                                                      | Standard care                        | 1. Patient knowledge.<br>2. Visits to the                                        |

|                                                        |                                                |                                            |                                                                                               |
|--------------------------------------------------------|------------------------------------------------|--------------------------------------------|-----------------------------------------------------------------------------------------------|
|                                                        |                                                |                                            | hospital.<br>3. More patient responsibility                                                   |
| People with symptomatic primary sclerosing cholangitis | Different treatments                           | Not applicable                             | 1. Cure of disease.<br>2. Delays progression of disease.                                      |
| People with primary sclerosing cholangitis             | Intervention to reverse liver damage           | Not applicable                             | 1. Mortality.<br>2. HRQoL.<br>3. Requirement for liver transplantation.                       |
| People with primary sclerosing cholangitis             | Intervention to treat fatigue                  | Not applicable                             | 1. HRQoL.<br>2. Fatigue.                                                                      |
| People with primary sclerosing cholangitis             | Intervention to treat itching                  | Not applicable                             | 1. HRQoL.<br>2. Itching.                                                                      |
| People with primary sclerosing cholangitis             | Specialist interest doctor                     | Standard care                              | 1. Mortality.<br>2. HRQoL.<br>3. Requirement for liver transplantation.<br>4. Symptom relief. |
| People at risk of oesophageal varices                  | Non-invasive assessment of oesophageal varices | Invasive assessment of oesophageal varices | Reduce bleeding oesophageal varices                                                           |



|                                                                                                                                                                                                                                                                                                                                                             |                                                                                                  |                                                                                                                             |                 |                                                                                                                                                                                                                              |
|-------------------------------------------------------------------------------------------------------------------------------------------------------------------------------------------------------------------------------------------------------------------------------------------------------------------------------------------------------------|--------------------------------------------------------------------------------------------------|-----------------------------------------------------------------------------------------------------------------------------|-----------------|------------------------------------------------------------------------------------------------------------------------------------------------------------------------------------------------------------------------------|
| 1<br>2<br>3<br>4<br>5<br>6<br>7<br>8<br>9<br>10<br>11<br>12<br>13<br>14<br>15<br>16<br>17<br>18<br>19<br>20<br>21<br>22<br>23<br>24<br>25<br>26<br>27<br>28<br>29<br>30<br>31<br>32<br>33<br>34<br>35<br>36<br>37<br>38<br>39<br>40<br>41<br>42<br>43<br>44<br>45<br>46<br>47<br>48<br>49<br>50<br>51<br>52<br>53<br>54<br>55<br>56<br>57<br>58<br>59<br>60 | People at risk of chronic liver disease                                                          | Alternative to biopsy for assessment of cirrhosis                                                                           | Liver biopsy    | Assessment of whole liver                                                                                                                                                                                                    |
|                                                                                                                                                                                                                                                                                                                                                             | People at risk of primary sclerosing cholangitis (PSC)                                           | Early diagnosis of primary sclerosing cholangitis<br>Alternate to liver biopsy                                              | Not applicable  | Not stated                                                                                                                                                                                                                   |
|                                                                                                                                                                                                                                                                                                                                                             | People with primary sclerosing cholangitis with normal or relatively normal liver function tests | Alternative to UKELD (United Kingdom Model for End-Stage Liver Disease) scores for prioritisation for liver transplantation | UKELD           | 1. More accurate assessment of transplant need for transplant amongst PSC patients.<br>2. Reduction in numbers of 'low score' PSC patients becoming too ill for transplant, or not being offered a transplant once 'listed'. |
|                                                                                                                                                                                                                                                                                                                                                             | People with positive AMA M2 with normal liver function tests                                     | Ursodeoxycholic acid                                                                                                        | No intervention | Slowing progression of primary biliary cholangitis                                                                                                                                                                           |

|                                                                                                                                                                                                                                                                                                                                                             |                                                                            |                       |                                                                                                     |                                        |
|-------------------------------------------------------------------------------------------------------------------------------------------------------------------------------------------------------------------------------------------------------------------------------------------------------------------------------------------------------------|----------------------------------------------------------------------------|-----------------------|-----------------------------------------------------------------------------------------------------|----------------------------------------|
| 1<br>2<br>3<br>4<br>5<br>6<br>7<br>8<br>9<br>10<br>11<br>12<br>13<br>14<br>15<br>16<br>17<br>18<br>19<br>20<br>21<br>22<br>23<br>24<br>25<br>26<br>27<br>28<br>29<br>30<br>31<br>32<br>33<br>34<br>35<br>36<br>37<br>38<br>39<br>40<br>41<br>42<br>43<br>44<br>45<br>46<br>47<br>48<br>49<br>50<br>51<br>52<br>53<br>54<br>55<br>56<br>57<br>58<br>59<br>60 | <p>People with suspected primary sclerosing cholangitis</p>                | <p>Nurse-led care</p> | <p>Standard care</p>                                                                                | <p>Earlier diagnosis and treatment</p> |
| <p>People with liver failure of unknown reason</p>                                                                                                                                                                                                                                                                                                          | <p>Investigations to find the cause of liver failure of unknown origin</p> | <p>Not applicable</p> | <p>More knowledge.</p>                                                                              |                                        |
| <p>People with Gilbert's syndrome</p>                                                                                                                                                                                                                                                                                                                       | <p>Treatment of fatigue related to Gilbert's syndrome</p>                  | <p>Not applicable</p> | <p>1. HRQoL.<br/>2. Chronic fatigue.<br/>3. Depression</p>                                          |                                        |
| <p>People with NAFLD (non-alcoholic fatty liver disease)</p>                                                                                                                                                                                                                                                                                                | <p>Breathing exercises</p>                                                 | <p>Standard care</p>  | <p>1. Faster recovery.<br/>2. Symptom relief<br/>3. Prevention of more serious complications</p>    |                                        |
| <p>People with NASH cirrhosis</p>                                                                                                                                                                                                                                                                                                                           | <p>Treatment of symptoms</p>                                               | <p>Not applicable</p> | <p>Improvement of symptoms</p>                                                                      |                                        |
| <p>People at risk of liver disease</p>                                                                                                                                                                                                                                                                                                                      | <p>Screening for autoimmune diseases</p>                                   | <p>No screening</p>   | <p>Earlier diagnosis and treatment</p>                                                              |                                        |
| <p>People with autoimmune hepatitis</p>                                                                                                                                                                                                                                                                                                                     | <p>Treatment of symptoms</p>                                               | <p>Not applicable</p> | <p>1. Measure feeling well (unspecified).<br/>2. Fatigue having energy.<br/>3. Fewer flare ups.</p> |                                        |

|                                  |                                                            |                                      |                                                                                                                                     |
|----------------------------------|------------------------------------------------------------|--------------------------------------|-------------------------------------------------------------------------------------------------------------------------------------|
|                                  |                                                            |                                      | 4. Less joint pain.<br>5. Disability.                                                                                               |
| People with autoimmune hepatitis | Methods to decrease stress                                 | Not applicable                       | 1. Measure feeling well (unspecified).<br>2. Fatigue having energy.<br>3. Fewer flare ups.<br>4. Less joint pain.<br>5. Disability. |
| People with liver disease        | Counselling for tremors and confusion                      | No counselling                       | Coping with symptoms                                                                                                                |
| People with NAFLD                | Staging of liver disease                                   | Not applicable                       | 1. Mortality.<br>2. Reversal of liver damage                                                                                        |
| People with NAFLD                | Metformin                                                  | No intervention                      | 1. Mortality.<br>2. Reversal of liver damage                                                                                        |
| People with NAFLD                | Standardised protocol for diagnosis and treatment of NAFLD | Standard care                        | 1. Mortality.<br>2. Reversal of liver damage                                                                                        |
| People with osteoarthritis       | Anti-inflammatory drugs                                    | Other interventions                  | Cirrhosis                                                                                                                           |
| People with diabetes             | Adequate control of diabetes                               | Lack of adequate control of diabetes | 1. NASH.<br>2. Cirrhosis.                                                                                                           |

|                                                                          |                                  |                                                                     |                |                                                                                              |
|--------------------------------------------------------------------------|----------------------------------|---------------------------------------------------------------------|----------------|----------------------------------------------------------------------------------------------|
| 1<br>2<br>3<br>4<br>5<br>6<br>7                                          | People at risk of NAFLD          | Screening: Early identification of causes                           | Standard care  | Prevention of liver disease                                                                  |
| 8<br>9<br>10<br>11<br>12<br>13<br>14<br>15<br>16<br>17<br>18<br>19<br>20 | People with NAFLD                | Treatments                                                          | Not applicable | 1. Cure<br>2. Prevention of liver disease<br>3. Disease progression<br>4. HRQoL              |
| 21<br>22<br>23<br>24<br>25<br>26<br>27<br>28<br>29<br>30<br>31<br>32     | People with upper abdominal pain | Screening: Early scan with ultrasound, blood tests, and urine tests | Standard care  | 1. Early identification of liver and gallbladder diseases<br>2. Appropriate advice/treatment |
| 33<br>34<br>35<br>36                                                     | People with NAFLD                | Lifestyle: diet and exercise                                        | Standard care  | 1. HRQoL                                                                                     |
| 37<br>38<br>39<br>40                                                     | People with NAFLD                | Specialist interest doctor                                          | Standard care  | 1. HRQoL                                                                                     |
| 41<br>42<br>43<br>44<br>45                                               | People at risk of liver disease  | Prophylactic interventions                                          | Not applicable | 1. Prevention of liver disease                                                               |
| 46<br>47<br>48<br>49<br>50<br>51<br>52                                   | People at risk of NAFLD          | Prophylactic treatments                                             | Not applicable | 1. Prevention of NAFLD<br>2. Decrease NAFLD                                                  |
| 53<br>54<br>55<br>56<br>57<br>58<br>59<br>60                             | People with NASH fibrosis        | Lifestyle: exercise                                                 | Standard care  | None stated                                                                                  |

|                                                                                                                                                                                                                                                                                                      |                                                                                                                                 |                       |                                                                                                                                                                                                                                                                             |
|------------------------------------------------------------------------------------------------------------------------------------------------------------------------------------------------------------------------------------------------------------------------------------------------------|---------------------------------------------------------------------------------------------------------------------------------|-----------------------|-----------------------------------------------------------------------------------------------------------------------------------------------------------------------------------------------------------------------------------------------------------------------------|
| <p>1<br/>2<br/>3<br/>4<br/>5<br/>6<br/>7<br/>8<br/>9<br/>10<br/>11<br/>12<br/>13<br/>14<br/>15<br/>16<br/>17<br/>18<br/>19<br/>20<br/>21<br/>22<br/>23<br/>24<br/>25<br/>26<br/>27<br/>28<br/>29<br/>30<br/>31<br/>32<br/>33<br/>34<br/>35<br/>36</p> <p>People with cryptogenic liver cirrhosis</p> | <p>Investigations to find the cause of cryptogenic cirrhosis</p>                                                                | <p>Not applicable</p> | <p>1. Reduction in liver disease diagnosis of the percentage regarded as cryptogenic.</p> <p>2. Establishment of relevant treatment pathways.</p> <p>3. Reduction in numbers of liver transplant required by earlier intervention using non-invasive treatment regimes.</p> |
| <p>37<br/>38<br/>39<br/>40<br/>41<br/>42<br/>43<br/>44<br/>45<br/>46<br/>47<br/>48<br/>49<br/>50<br/>51<br/>52<br/>53<br/>54<br/>55<br/>56<br/>57<br/>58<br/>59<br/>60</p> <p>People with cirrhosis</p>                                                                                              | <p>Community-led psychological support (on lifestyle: diet and exercise, stress, work-life balance, and general well-being)</p> | <p>Standard care</p>  | <p>1. Reduction of symptoms such as nausea, fatigue.</p> <p>2. Improved nutrition and healthier weights.</p> <p>3. Improved HRQoL</p> <p>4. Improved sense of wellbeing</p> <p>5. Successful work</p>                                                                       |

|                                  |                                        |               |                                                                                                                                                                      |
|----------------------------------|----------------------------------------|---------------|----------------------------------------------------------------------------------------------------------------------------------------------------------------------|
|                                  |                                        |               | <p>and job retention</p> <p>6. Good sense of self determination/empowerment and motivation</p> <p>7. Improved clinical markers (unspecified)</p>                     |
| Newborns                         | Screening for metabolic liver diseases | No screening  | <p>1. Early treatment for people with metabolic liver disease (including dietary advice)</p> <p>2. Mortality.</p> <p>3. HRQoL.</p> <p>4. Prevent type 2 diabetes</p> |
| People with autoimmune hepatitis | Telephone-based care                   | Standard care | <p>1. Reduction in time spent in outpatients</p> <p>2. Less spent on car-parking at hospitals</p>                                                                    |
| People with NASH and diabetes    | Liver transplantation                  | Standard care | <p>1. Mortality</p>                                                                                                                                                  |

|                                                                                                                                                                                                                                                                                                                                                             |                                                                                                                                                                                                                                                                        |                                                                                                                                                                                                                                                              |                                                                                                                               |                                                                                                                                                                                                                                                                                                                                                     |
|-------------------------------------------------------------------------------------------------------------------------------------------------------------------------------------------------------------------------------------------------------------------------------------------------------------------------------------------------------------|------------------------------------------------------------------------------------------------------------------------------------------------------------------------------------------------------------------------------------------------------------------------|--------------------------------------------------------------------------------------------------------------------------------------------------------------------------------------------------------------------------------------------------------------|-------------------------------------------------------------------------------------------------------------------------------|-----------------------------------------------------------------------------------------------------------------------------------------------------------------------------------------------------------------------------------------------------------------------------------------------------------------------------------------------------|
| 1<br>2<br>3<br>4<br>5<br>6<br>7<br>8<br>9<br>10<br>11<br>12<br>13<br>14<br>15<br>16<br>17<br>18<br>19<br>20<br>21<br>22<br>23<br>24<br>25<br>26<br>27<br>28<br>29<br>30<br>31<br>32<br>33<br>34<br>35<br>36<br>37<br>38<br>39<br>40<br>41<br>42<br>43<br>44<br>45<br>46<br>47<br>48<br>49<br>50<br>51<br>52<br>53<br>54<br>55<br>56<br>57<br>58<br>59<br>60 | <p>People with primary biliary cholangitis (newly diagnosed)</p> <p>People with primary sclerosing cholangitis</p> <p>People with bile duct cancer</p> <p>People with gallbladder sludge with digestive symptoms</p> <p>People with NAFLD</p> <p>People with NAFLD</p> | <p>Adequate drinking water</p> <p>Treatment targeted against deformation of bile duct</p> <p>Treatment targeted against deformation of bile duct</p> <p>Avoiding surgery</p> <p>Education of healthcare professionals</p> <p>Education of general public</p> | <p>Standard care</p> <p>Standard care</p> <p>Standard care</p> <p>Standard care</p> <p>Standard care</p> <p>Standard care</p> | <p>1. HRQoL.<br/>2. Liver function tests.</p> <p>1. Time to end-stage liver disease.</p> <p>Not stated</p> <p>1. Symptom relief</p> <p>1. Greater awareness of conditions.<br/>2. Preventative measures.<br/>3. Greater knowledge base.</p> <p>1. Greater awareness of conditions.<br/>2. Preventative measures.<br/>3. Greater knowledge base.</p> |
|-------------------------------------------------------------------------------------------------------------------------------------------------------------------------------------------------------------------------------------------------------------------------------------------------------------------------------------------------------------|------------------------------------------------------------------------------------------------------------------------------------------------------------------------------------------------------------------------------------------------------------------------|--------------------------------------------------------------------------------------------------------------------------------------------------------------------------------------------------------------------------------------------------------------|-------------------------------------------------------------------------------------------------------------------------------|-----------------------------------------------------------------------------------------------------------------------------------------------------------------------------------------------------------------------------------------------------------------------------------------------------------------------------------------------------|

|                                                                                                    |                                                                        |                                                                        |                       |                                                                                                                                                                                       |
|----------------------------------------------------------------------------------------------------|------------------------------------------------------------------------|------------------------------------------------------------------------|-----------------------|---------------------------------------------------------------------------------------------------------------------------------------------------------------------------------------|
| 1<br>2<br>3<br>4<br>5<br>6<br>7<br>8<br>9<br>10<br>11                                              | People with NAFLD                                                      | Methods to make an accurate diagnosis (including liver function tests) | Not applicable        | Not stated                                                                                                                                                                            |
| 12<br>13<br>14<br>15<br>16                                                                         | People with NAFLD (overweight)                                         | Interventions to lose weight                                           | Not applicable        | Weight loss                                                                                                                                                                           |
| 17<br>18<br>19<br>20                                                                               | People with liver disease (newly diagnosed)                            | Mental health support                                                  | Not applicable        | Mental health                                                                                                                                                                         |
| 21<br>22<br>23<br>24<br>25<br>26<br>27                                                             | Children with multiple autoimmune disorders related to liver           | Genetic testing of telomere lengths                                    | Other tests/ no tests | Not stated                                                                                                                                                                            |
| 28<br>29<br>30<br>31<br>32<br>33<br>34<br>35<br>36                                                 | Children with multiple autoimmune disorders related to liver           | Stem cell therapy                                                      | Standard care         | Reduction in all conditions with only one drug with little side effects                                                                                                               |
| 37<br>38<br>39<br>40<br>41<br>42<br>43                                                             | People with primary biliary cholangitis (especially younger age group) | Treatments based on tools for predicting prognosis                     | Standard care         | Better care for people with high risk of progression                                                                                                                                  |
| 44<br>45<br>46<br>47<br>48<br>49<br>50<br>51<br>52<br>53<br>54<br>55<br>56<br>57<br>58<br>59<br>60 | People with chronic hepatitis C                                        | Lifestyle: diet                                                        | Standard care         | <ol style="list-style-type: none"> <li>1. Improvement in overall health.</li> <li>2. Decrease in liver damage requiring hospital admission.</li> <li>3. Patient knowledge.</li> </ol> |



1  
2  
3  
4  
5  
6  
7  
8  
9  
10  
11  
12  
13  
14  
15  
16  
17  
18  
19  
20  
21  
22  
23  
24  
25  
26  
27  
28  
29  
30  
31  
32  
33  
34  
35  
36  
37  
38  
39  
40  
41  
42  
43  
44  
45  
46  
47  
48  
49  
50  
51  
52  
53  
54  
55  
56  
57  
58  
59  
60

|                                                                              |                                                           |                      |                                                                                                                                                                                                                                                                |
|------------------------------------------------------------------------------|-----------------------------------------------------------|----------------------|----------------------------------------------------------------------------------------------------------------------------------------------------------------------------------------------------------------------------------------------------------------|
|                                                                              |                                                           |                      | <p>4. Healthcare professional knowledge.</p> <p>5. Fewer treatment-related complications.</p> <p>6. Decreasing pain and discomfort.</p> <p>7. Clear guidelines for successful dietary needs.</p>                                                               |
| <p>Healthcare professionals dealing with people with chronic hepatitis C</p> | <p>Education of healthcare professionals (about diet)</p> | <p>Standard care</p> | <p>1. Improvement in overall health.</p> <p>2. Decrease in liver damage requiring hospital admission.</p> <p>3. Patient knowledge.</p> <p>4. Healthcare professional knowledge.</p> <p>5. Fewer treatment-related complications.</p> <p>6. Decreasing pain</p> |

|                                                                  |                                                                                                                            |                      |                                                                                                                                                                                                                                                 |
|------------------------------------------------------------------|----------------------------------------------------------------------------------------------------------------------------|----------------------|-------------------------------------------------------------------------------------------------------------------------------------------------------------------------------------------------------------------------------------------------|
|                                                                  |                                                                                                                            |                      | <p>and discomfort.</p> <p>7. Clear guidelines for successful dietary needs.</p>                                                                                                                                                                 |
| <p>Healthcare professionals dealing with people with NAFLD</p>   | <p>Education of healthcare professionals (around support to patients on weight control, diet, exercise and life style)</p> | <p>Standard care</p> | <ol style="list-style-type: none"> <li>1. Preventing progression into NASH and cirrhosis.</li> <li>2. Reducing symptoms of aching sides, leg weakness, sickness and nausea.</li> <li>3. Prevent heart attacks and strokes.</li> </ol>           |
| <p>Family members of people with primary biliary cholangitis</p> | <p>Screening of family members for primary biliary cholangitis</p>                                                         | <p>No screening</p>  | <ol style="list-style-type: none"> <li>1. Establishing the genetic link for primary biliary cholangitis.</li> <li>2. Earlier identification of primary biliary cholangitis who may have PBC or be at risk.</li> <li>3. Cost-savings.</li> </ol> |

|                                                                                                                      |                                                                    |                                                                                                                                                                     |                |                                                                                                                                                                            |
|----------------------------------------------------------------------------------------------------------------------|--------------------------------------------------------------------|---------------------------------------------------------------------------------------------------------------------------------------------------------------------|----------------|----------------------------------------------------------------------------------------------------------------------------------------------------------------------------|
| 1<br>2<br>3<br>4<br>5<br>6<br>7<br>8<br>9                                                                            | People with positive AMA<br>M2 with normal liver<br>function tests | Screening for cirrhosis<br>using biopsy                                                                                                                             | No screening   | Accurate diagnosis of<br>primary biliary<br>cholangitis.                                                                                                                   |
| 10<br>11<br>12<br>13<br>14<br>15<br>16<br>17<br>18<br>19<br>20<br>21<br>22<br>23<br>24<br>25<br>26<br>27             | People with primary biliary<br>cholangitis                         | Screening for other<br>autoimmune<br>conditions associated<br>with primary biliary<br>cholangitis and<br>complications related<br>to primary biliary<br>cholangitis | No screening   | 1. HRQoL.<br>2. Costs.                                                                                                                                                     |
| 28<br>29<br>30<br>31                                                                                                 | People with autoimmune<br>liver disease                            | Treatment of fatigue<br>and others symptoms                                                                                                                         | Not applicable | Remission                                                                                                                                                                  |
| 32<br>33<br>34<br>35<br>36<br>37<br>38<br>39<br>40                                                                   | People with primary<br>sclerosing cholangitis                      | Standardised protocol<br>for follow-up of<br>patients with primary<br>sclerosing cholangitis                                                                        | Standard care  | 1. Reduce need for<br>annual<br>investigations.<br>2. Costs.                                                                                                               |
| 41<br>42<br>43<br>44<br>45<br>46<br>47<br>48<br>49<br>50<br>51<br>52<br>53<br>54<br>55<br>56<br>57<br>58<br>59<br>60 | People with other<br>autoimmune disease                            | Screening for liver<br>disease                                                                                                                                      | No screening   | 1. Decreasing risk of<br>severe liver damage<br>and admission to<br>hospital<br>2. Reducing the need<br>for liver transplants<br>3. Decreasing the risk<br>of liver cancer |

|                                         |                                                          |                                                                                                       |                                                                                                           |
|-----------------------------------------|----------------------------------------------------------|-------------------------------------------------------------------------------------------------------|-----------------------------------------------------------------------------------------------------------|
|                                         |                                                          |                                                                                                       | 4. Mortality<br>5. HRQoL                                                                                  |
| People with NAFLD                       | Pathway for managing end of life care                    | Standard care                                                                                         | 1. Patient and carer satisfaction<br>2. Patient HRQoL<br>3. Symptom relief.                               |
| People with decompensated liver disease | Lifestyle: nutritional treatment                         | Not applicable                                                                                        | 1. Improved survival.<br>2. Reduced symptoms.<br>3. Improved nutritional status.<br>4. Improved Strength. |
| People with decompensated liver disease | Measuring energy requirements with indirect calorimeters | Current UK guidance on requirements (Parenteral & Enteral Nutrition Group) (high energy requirements) | 1. Improved survival.<br>2. Reduced symptoms.<br>3. Improved nutritional status.<br>4. Improved Strength. |
| People with hepatic encephalopathy      | Branch chain amino acids                                 | Standard care                                                                                         | 1. Improved survival.<br>2. Reduced symptoms.<br>3. Improved                                              |

|                                                             |                                                                                                 |                             |                                                                                                           |
|-------------------------------------------------------------|-------------------------------------------------------------------------------------------------|-----------------------------|-----------------------------------------------------------------------------------------------------------|
|                                                             |                                                                                                 |                             | nutritional status.<br>4. Improved Strength.                                                              |
| People with decompensated liver disease with muscle wasting | Branch chain amino acids                                                                        | Standard care               | 1. Improved survival.<br>2. Reduced symptoms.<br>3. Improved nutritional status.<br>4. Improved Strength. |
| People with decompensated liver disease with muscle wasting | Lifestyle: exercise                                                                             | Standard care               | 1. Improved survival.<br>2. Reduced symptoms.<br>3. Improved nutritional status.<br>4. Improved Strength. |
| People with decompensated liver disease                     | Standardised nutritional assessment of patients and outcomes in nutritional intervention trials | Non-standardised assessment | 1. Improved survival.<br>2. Reduced symptoms.<br>3. Improved nutritional status.<br>4. Improved Strength. |

|                                                             |                                                                                                           |                                      |                                                                                                                          |
|-------------------------------------------------------------|-----------------------------------------------------------------------------------------------------------|--------------------------------------|--------------------------------------------------------------------------------------------------------------------------|
|                                                             |                                                                                                           |                                      | 5. Better conduct of future trials.                                                                                      |
| People with NAFLD                                           | Methods to increase self care                                                                             | Not applicable                       | Reducing symptoms                                                                                                        |
| People with NAFLD                                           | Methods to decrease shortness of breath                                                                   | Not applicable                       | Reducing symptoms                                                                                                        |
| People with liver disease                                   | Interventions to decrease fatigue                                                                         | Not applicable                       | Fatigue                                                                                                                  |
| Healthcare professionals dealing with people with cirrhosis | Education of healthcare professionals about cirrhosis (complications and benefits and harms of treatment) | Standard care                        | Better advice to patients by health professionals regarding complications and benefits and harms of different treatments |
| People with primary biliary cholangitis                     | Ursodeoxycholic acid (including optimal dose)                                                             | No intervention/ other interventions | 1. Liver function tests.<br>2. Minimal effective dose of ursodeoxycholic acid.<br>3. Good sleep.                         |
| People with liver cancer and ascites                        | Different interventions                                                                                   | Not applicable                       | HRQoL                                                                                                                    |

|                                                                                        |                                                |                                    |                         |                                                                                 |
|----------------------------------------------------------------------------------------|------------------------------------------------|------------------------------------|-------------------------|---------------------------------------------------------------------------------|
| 1<br>2<br>3<br>4<br>5<br>6<br>7<br>8<br>9<br>10<br>11                                  | People with primary sclerosing cholangitis     | Screening for cancer               | No screening            | 1. Benefits<br>2. Earlier diagnosis of bile duct cancer<br>3. Mortality         |
| 12<br>13<br>14<br>15<br>16<br>17<br>18                                                 | People with primary or metastatic liver cancer | Nurse-led care (follow-up clinic)  | Doctor-led follow-up    | 1. Patient satisfaction<br>2. Timely surveillance                               |
| 19<br>20<br>21<br>22                                                                   | People with cirrhosis                          | Life-style: nutritional advice     | Not applicable          | 1. Fatigue<br>2. Muscle wasting                                                 |
| 23<br>24<br>25<br>26<br>27                                                             | People with polycystic liver disease           | Surgery                            | Non-surgical management | 1. Recurrence<br>2. HRQoL                                                       |
| 28<br>29<br>30<br>31<br>32<br>33<br>34                                                 | People with gallstones                         | Avoiding surgery                   | Surgery                 | 1. Requirement for surgery<br>2. Costs to NHS                                   |
| 35<br>36<br>37<br>38<br>39<br>40<br>41<br>42<br>43<br>44<br>45                         | People at risk of NASH                         | Nurse-led care                     | No intervention         | 1. Early diagnosis of NASH.<br>2. Successful treatment of NASH.<br>3. Mortality |
| 46<br>47<br>48<br>49<br>50<br>51<br>52<br>53<br>54<br>55<br>56<br>57<br>58<br>59<br>60 | People at risk of NASH                         | Screening for NASH using Fibroscan | No intervention         | 1. Early diagnosis of NASH.<br>2. Successful treatment of NASH.<br>3. Mortality |

|                                                                                                                                              |                        |                                                   |                 |                                                                                                                                                               |
|----------------------------------------------------------------------------------------------------------------------------------------------|------------------------|---------------------------------------------------|-----------------|---------------------------------------------------------------------------------------------------------------------------------------------------------------|
| 1<br>2<br>3<br>4<br>5<br>6<br>7<br>8<br>9<br>10<br>11<br>12<br>13<br>14                                                                      | People at risk of NASH | Support group<br>focussed on diet and<br>exercise | No intervention | 1. Prevention of<br>NASH.<br>2. Successful<br>treatment of NASH.<br>3. Mortality                                                                              |
| 15<br>16<br>17<br>18                                                                                                                         | People at risk of NASH | Emotional support<br>group for carers             | No intervention | HRQoL                                                                                                                                                         |
| 19<br>20<br>21<br>22<br>23<br>24<br>25<br>26<br>27<br>28<br>29<br>30<br>31<br>32<br>33<br>34<br>35<br>36                                     | People with NASH       | Nurse-led care                                    | Standard care   | 1. Mortality.<br>2. HRQoL.<br>3. Requirement for<br>liver transplantation.<br>4. Liver cancer.<br>5. Liver failure.<br>6. Treatment-related<br>complications. |
| 37<br>38<br>39<br>40<br>41<br>42<br>43<br>44<br>45<br>46<br>47<br>48<br>49<br>50<br>51<br>52<br>53<br>54<br>55<br>56<br>57<br>58<br>59<br>60 | People with NASH       | Lifestyle: diet                                   | Standard care   | 1. Mortality.<br>2. HRQoL.<br>3. Requirement for<br>liver transplantation.<br>4. Liver cancer.<br>5. Liver failure.<br>6. Treatment-related<br>complications. |



|                                                                                                                                                                            |                         |                                                                   |                          |                                                                                                                                                                                                                     |
|----------------------------------------------------------------------------------------------------------------------------------------------------------------------------|-------------------------|-------------------------------------------------------------------|--------------------------|---------------------------------------------------------------------------------------------------------------------------------------------------------------------------------------------------------------------|
| 1<br>2<br>3<br>4<br>5<br>6<br>7<br>8<br>9                                                                                                                                  | People with NASH        | Different interventions to decrease anxiety and depression        | Standard care            | Anxiety and depression                                                                                                                                                                                              |
| 10<br>11<br>12<br>13                                                                                                                                                       | People with NASH        | Research design using support group                               | Standard research design | Help towards better research                                                                                                                                                                                        |
| 14<br>15<br>16<br>17<br>18                                                                                                                                                 | General population      | Life style: diet and exercise                                     | No intervention          | HRQoL                                                                                                                                                                                                               |
| 19<br>20<br>21<br>22<br>23<br>24<br>25                                                                                                                                     | General population      | Education of people (patient information leaflet at GP surgeries) | No intervention          | 1. Prevention of NASH.<br>2. HRQoL.                                                                                                                                                                                 |
| 26<br>27<br>28<br>29<br>30<br>31<br>32<br>33<br>34<br>35<br>36<br>37<br>38<br>39<br>40<br>41<br>42<br>43<br>44<br>45<br>46<br>47<br>48<br>49<br>50<br>51<br>52<br>53<br>54 | General population      | Screening: for liver disease                                      | No intervention          | 1. Early diagnosis of liver disease<br>2. Mortality<br>3. HRQoL<br>4. Requirement for liver transplantation<br>5. Costs<br>6. Requirement for hospital admission for severe liver damage<br>7. Primary liver cancer |
| 55<br>56<br>57<br>58<br>59<br>60                                                                                                                                           | Primary school children | Lifestyle: nutritional and dietary advice                         | No intervention          | 1. Adherence to healthy diet and                                                                                                                                                                                    |

|                                                     |                                                            |                |                                                 |
|-----------------------------------------------------|------------------------------------------------------------|----------------|-------------------------------------------------|
|                                                     |                                                            |                | exercise to sustain healthy life style.         |
| People undergoing liver resection                   | Best method to assess function and volume of remnant liver | Not applicable | 1. Mortality.<br>2. HRQoL.<br>3. Complications. |
| People undergoing liver resection                   | Best method to assess cardiopulmonary function?            | Not applicable | 1. Mortality.<br>2. HRQoL.<br>3. Complications. |
| People undergoing liver resection                   | Pre-operative education                                    | Standard care  | 1. Mortality.<br>2. HRQoL.<br>3. Complications. |
| Surgeons treating people undergoing liver resection | Simulation and training of surgeons                        | Standard care  | 1. Mortality.<br>2. HRQoL.<br>3. Complications. |
| People undergoing liver resection                   | Growth factors to optimise muscle and fat content          | Standard care  | 1. Mortality.<br>2. HRQoL.<br>3. Complications. |
| People undergoing liver resection                   | Pharmacological interventions for weight loss              | Not applicable | 1. Mortality.<br>2. HRQoL.<br>3. Complications. |
| People undergoing liver resection                   | Portal vein embolisation                                   | Standard care  | 1. Mortality.<br>2. HRQoL.<br>3. Complications. |

|                                                                                                                                                                                                                                                                                                                                                             |                                                     |                                                                                        |                              |                                                 |
|-------------------------------------------------------------------------------------------------------------------------------------------------------------------------------------------------------------------------------------------------------------------------------------------------------------------------------------------------------------|-----------------------------------------------------|----------------------------------------------------------------------------------------|------------------------------|-------------------------------------------------|
| 1<br>2<br>3<br>4<br>5<br>6<br>7<br>8<br>9<br>10<br>11<br>12<br>13<br>14<br>15<br>16<br>17<br>18<br>19<br>20<br>21<br>22<br>23<br>24<br>25<br>26<br>27<br>28<br>29<br>30<br>31<br>32<br>33<br>34<br>35<br>36<br>37<br>38<br>39<br>40<br>41<br>42<br>43<br>44<br>45<br>46<br>47<br>48<br>49<br>50<br>51<br>52<br>53<br>54<br>55<br>56<br>57<br>58<br>59<br>60 | People undergoing liver resection                   | Reducing systemic inflammation using steroids                                          | Standard care                | 1. Mortality.<br>2. HRQoL.<br>3. Complications. |
|                                                                                                                                                                                                                                                                                                                                                             | People undergoing liver resection                   | Open liver resection                                                                   | Laparoscopic liver resection | 1. Mortality.<br>2. HRQoL.<br>3. Complications. |
|                                                                                                                                                                                                                                                                                                                                                             | People undergoing liver resection                   | Tumour visualisation and localisation of the tumour                                    | Standard care                | 1. Mortality.<br>2. HRQoL.<br>3. Complications. |
|                                                                                                                                                                                                                                                                                                                                                             | People undergoing liver resection                   | Goal directed therapy during operation                                                 | Standard care                | 1. Mortality.<br>2. HRQoL.<br>3. Complications. |
|                                                                                                                                                                                                                                                                                                                                                             | Surgeons treating people undergoing liver resection | Use of magnifying surgical loupes during liver surgery                                 | Standard care                | 1. Mortality.<br>2. HRQoL.<br>3. Complications. |
|                                                                                                                                                                                                                                                                                                                                                             | People undergoing liver resection                   | Portal vein pressure decrease (by the use of drugs such as vasopressin) during surgery | Standard care                | 1. Mortality.<br>2. HRQoL.<br>3. Complications. |
|                                                                                                                                                                                                                                                                                                                                                             | People undergoing liver resection                   | Transection techniques                                                                 | Not applicable               | 1. Mortality.<br>2. HRQoL.<br>3. Complications. |

|                                                                                                                                                                                                                                                                                                                                                             |                                                                                               |                               |                                                 |                                                 |
|-------------------------------------------------------------------------------------------------------------------------------------------------------------------------------------------------------------------------------------------------------------------------------------------------------------------------------------------------------------|-----------------------------------------------------------------------------------------------|-------------------------------|-------------------------------------------------|-------------------------------------------------|
| 1<br>2<br>3<br>4<br>5<br>6<br>7<br>8<br>9<br>10<br>11<br>12<br>13<br>14<br>15<br>16<br>17<br>18<br>19<br>20<br>21<br>22<br>23<br>24<br>25<br>26<br>27<br>28<br>29<br>30<br>31<br>32<br>33<br>34<br>35<br>36<br>37<br>38<br>39<br>40<br>41<br>42<br>43<br>44<br>45<br>46<br>47<br>48<br>49<br>50<br>51<br>52<br>53<br>54<br>55<br>56<br>57<br>58<br>59<br>60 | People undergoing liver resection                                                             | Vascular occlusion techniques | Not applicable                                  | 1. Mortality.<br>2. HRQoL.<br>3. Complications. |
| People undergoing liver resection                                                                                                                                                                                                                                                                                                                           | Cardiopulmonary and pharmacological interventions for decreasing blood loss                   | Not applicable                | 1. Mortality.<br>2. HRQoL.<br>3. Complications. |                                                 |
| People undergoing liver resection                                                                                                                                                                                                                                                                                                                           | Use of peritoneal drains                                                                      | No drain                      | 1. Mortality.<br>2. HRQoL.<br>3. Complications. |                                                 |
| People undergoing liver resection                                                                                                                                                                                                                                                                                                                           | ALPPS procedure (Associating Liver Partition and Portal vein Ligation for Staged hepatectomy) | Standard care                 | 1. Mortality.<br>2. HRQoL.<br>3. Complications. |                                                 |
| People undergoing liver resection                                                                                                                                                                                                                                                                                                                           | Goal directed therapy (post-operative)                                                        | Standard care                 | 1. Mortality.<br>2. HRQoL.<br>3. Complications. |                                                 |
| People undergoing liver resection                                                                                                                                                                                                                                                                                                                           | Pain control protocol                                                                         | Standard care                 | 1. Mortality.<br>2. HRQoL.<br>3. Complications. |                                                 |
| People undergoing liver resection                                                                                                                                                                                                                                                                                                                           | Early mobilisation protocol                                                                   | Standard care                 | 1. Mortality.<br>2. HRQoL.<br>3. Complications. |                                                 |

|                                                                                                                                                                                                                                                                                                                                                             |                                                   |                                                                                          |                                     |                                                 |
|-------------------------------------------------------------------------------------------------------------------------------------------------------------------------------------------------------------------------------------------------------------------------------------------------------------------------------------------------------------|---------------------------------------------------|------------------------------------------------------------------------------------------|-------------------------------------|-------------------------------------------------|
| 1<br>2<br>3<br>4<br>5<br>6<br>7<br>8<br>9<br>10<br>11<br>12<br>13<br>14<br>15<br>16<br>17<br>18<br>19<br>20<br>21<br>22<br>23<br>24<br>25<br>26<br>27<br>28<br>29<br>30<br>31<br>32<br>33<br>34<br>35<br>36<br>37<br>38<br>39<br>40<br>41<br>42<br>43<br>44<br>45<br>46<br>47<br>48<br>49<br>50<br>51<br>52<br>53<br>54<br>55<br>56<br>57<br>58<br>59<br>60 | People undergoing liver resection                 | Early oral intake protocol                                                               | Standard care                       | 1. Mortality.<br>2. HRQoL.<br>3. Complications. |
|                                                                                                                                                                                                                                                                                                                                                             | People undergoing liver resection                 | Portal vein pressure decrease (by the use of drugs such as vasopressin) post-operatively | Standard care                       | 1. Mortality.<br>2. HRQoL.<br>3. Complications. |
|                                                                                                                                                                                                                                                                                                                                                             | People with unresectable hepatocellular carcinoma | Radioembolisation                                                                        | No intervention/other interventions | 1. Mortality.<br>2. HRQoL.<br>3. Complications. |
|                                                                                                                                                                                                                                                                                                                                                             | People with unresectable hepatocellular carcinoma | External beam radiotherapy                                                               | No intervention/other interventions | 1. Mortality.<br>2. HRQoL.<br>3. Complications. |
|                                                                                                                                                                                                                                                                                                                                                             | People with chronic hepatitis B                   | Screening for cancer                                                                     | No screening                        | 1. Mortality.<br>2. HRQoL.<br>3. Complications. |
|                                                                                                                                                                                                                                                                                                                                                             | People with hepatocellular carcinoma              | Cryotherapy                                                                              | No intervention/other interventions | 1. Mortality.<br>2. HRQoL.<br>3. Complications. |
|                                                                                                                                                                                                                                                                                                                                                             | People with hepatocellular carcinoma              | Systemic chemotherapy                                                                    | No intervention/other interventions | 1. Mortality.<br>2. HRQoL.<br>3. Complications. |

|                                                                                                                                                                                                                                                                                                                                                             |                                                                |                                  |                                     |                                                 |
|-------------------------------------------------------------------------------------------------------------------------------------------------------------------------------------------------------------------------------------------------------------------------------------------------------------------------------------------------------------|----------------------------------------------------------------|----------------------------------|-------------------------------------|-------------------------------------------------|
| 1<br>2<br>3<br>4<br>5<br>6<br>7<br>8<br>9<br>10<br>11<br>12<br>13<br>14<br>15<br>16<br>17<br>18<br>19<br>20<br>21<br>22<br>23<br>24<br>25<br>26<br>27<br>28<br>29<br>30<br>31<br>32<br>33<br>34<br>35<br>36<br>37<br>38<br>39<br>40<br>41<br>42<br>43<br>44<br>45<br>46<br>47<br>48<br>49<br>50<br>51<br>52<br>53<br>54<br>55<br>56<br>57<br>58<br>59<br>60 | People with early or very early hepatocellular carcinoma       | Treatment                        | Not applicable                      | 1. Mortality.<br>2. HRQoL.<br>3. Complications. |
|                                                                                                                                                                                                                                                                                                                                                             | People with intermediate hepatocellular carcinoma              | Treatment                        | Not applicable                      | 1. Mortality.<br>2. HRQoL.<br>3. Complications. |
|                                                                                                                                                                                                                                                                                                                                                             | People with hepatocellular carcinoma                           | Tamoxifen                        | No intervention/other interventions | 1. Mortality.<br>2. HRQoL.<br>3. Complications. |
|                                                                                                                                                                                                                                                                                                                                                             | People with unresectable hepatocellular carcinoma              | Transarterial embolisation       | No intervention/other interventions | 1. Mortality.<br>2. HRQoL.<br>3. Complications. |
|                                                                                                                                                                                                                                                                                                                                                             | People with unresectable hepatocellular carcinoma              | Tyrosine kinase inhibitors       | No intervention/other interventions | 1. Mortality.<br>2. HRQoL.<br>3. Complications. |
|                                                                                                                                                                                                                                                                                                                                                             | People undergoing liver resection for hepatocellular carcinoma | Neoadjuvant and adjuvant therapy | No intervention/other interventions | 1. Mortality.<br>2. HRQoL.<br>3. Complications. |
|                                                                                                                                                                                                                                                                                                                                                             | People with unresectable hepatocellular carcinoma              | Transarterial chemoembolisation  | No intervention/other interventions | 1. Mortality.<br>2. HRQoL.<br>3. Complications. |
|                                                                                                                                                                                                                                                                                                                                                             | People with hepatocellular carcinoma                           | Interferon                       | No intervention/other interventions | 1. Mortality.<br>2. HRQoL.<br>3. Complications. |

|                                                                                                                                                                                                                                                                                                                                                             |                                                                                                                                                                                                                                                                                                                                                                                                                                                                 |                                                                                                                                                                                                                                                                                                                        |                                                                                                                                                                                                                                                             |                                                                                                                                                                                                                                                                                                                                                                                                                                                                         |
|-------------------------------------------------------------------------------------------------------------------------------------------------------------------------------------------------------------------------------------------------------------------------------------------------------------------------------------------------------------|-----------------------------------------------------------------------------------------------------------------------------------------------------------------------------------------------------------------------------------------------------------------------------------------------------------------------------------------------------------------------------------------------------------------------------------------------------------------|------------------------------------------------------------------------------------------------------------------------------------------------------------------------------------------------------------------------------------------------------------------------------------------------------------------------|-------------------------------------------------------------------------------------------------------------------------------------------------------------------------------------------------------------------------------------------------------------|-------------------------------------------------------------------------------------------------------------------------------------------------------------------------------------------------------------------------------------------------------------------------------------------------------------------------------------------------------------------------------------------------------------------------------------------------------------------------|
| 1<br>2<br>3<br>4<br>5<br>6<br>7<br>8<br>9<br>10<br>11<br>12<br>13<br>14<br>15<br>16<br>17<br>18<br>19<br>20<br>21<br>22<br>23<br>24<br>25<br>26<br>27<br>28<br>29<br>30<br>31<br>32<br>33<br>34<br>35<br>36<br>37<br>38<br>39<br>40<br>41<br>42<br>43<br>44<br>45<br>46<br>47<br>48<br>49<br>50<br>51<br>52<br>53<br>54<br>55<br>56<br>57<br>58<br>59<br>60 | <p>People with hepatocellular carcinoma</p> <p>People undergoing liver resection for hepatocellular carcinoma</p> <p>People with hepatocellular carcinoma</p> <p>People undergoing liver resection for hepatocellular carcinoma</p> <p>People undergoing liver resection for hepatocellular carcinoma</p> <p>People with advanced biliary tract carcinoma</p> <p>People with unresectable cholangiocarcinoma</p> <p>People undergoing liver transplantation</p> | <p>Surgical resection</p> <p>Anterior approach</p> <p>Radiofrequency ablation</p> <p>Post-operative transarterial chemoembolisation</p> <p>Post-operative lamivudine with or without adefovir dipivoxil</p> <p>gemcitabine-based chemotherapy</p> <p>Endoscopic treatment</p> <p>Pharmacological interventions for</p> | <p>Liver transplantation</p> <p>Conventional liver resection</p> <p>No intervention/other interventions</p> <p>No intervention/other interventions</p> <p>No intervention/other interventions</p> <p>Surgery</p> <p>No intervention/other interventions</p> | <p>1. Mortality.<br/>2. HRQoL.<br/>3. Complications.</p> |
|-------------------------------------------------------------------------------------------------------------------------------------------------------------------------------------------------------------------------------------------------------------------------------------------------------------------------------------------------------------|-----------------------------------------------------------------------------------------------------------------------------------------------------------------------------------------------------------------------------------------------------------------------------------------------------------------------------------------------------------------------------------------------------------------------------------------------------------------|------------------------------------------------------------------------------------------------------------------------------------------------------------------------------------------------------------------------------------------------------------------------------------------------------------------------|-------------------------------------------------------------------------------------------------------------------------------------------------------------------------------------------------------------------------------------------------------------|-------------------------------------------------------------------------------------------------------------------------------------------------------------------------------------------------------------------------------------------------------------------------------------------------------------------------------------------------------------------------------------------------------------------------------------------------------------------------|

|                                                                   |                                                         |                                     |                                                 |
|-------------------------------------------------------------------|---------------------------------------------------------|-------------------------------------|-------------------------------------------------|
|                                                                   | reducing ischaemia<br>reperfusion injury                |                                     |                                                 |
| People undergoing liver transplantation for hepatitis B infection | Antibiotic prophylaxis                                  | No intervention/other interventions | 1. Mortality.<br>2. HRQoL.<br>3. Complications. |
| People undergoing liver transplantation for hepatitis B infection | Hepatitis B immune globulin                             | No intervention/other interventions | 1. Mortality.<br>2. HRQoL.<br>3. Complications. |
| People undergoing liver transplantation                           | Prostaglandins                                          | No intervention/other interventions | 1. Mortality.<br>2. HRQoL.<br>3. Complications. |
| People undergoing haemopoietic stem cell transplantation          | Interventions to prevent hepatic veno-occlusive disease | Not applicable                      | 1. Mortality.<br>2. HRQoL.<br>3. Complications. |
| People undergoing haemopoietic stem cell transplantation          | Interventions to treat hepatic veno-occlusive disease   | Not applicable                      | 1. Mortality.<br>2. HRQoL.<br>3. Complications. |
| People undergoing liver transplantation                           | Immunosuppressive regimens                              | Not applicable                      | 1. Mortality.<br>2. HRQoL.<br>3. Complications. |
| People undergoing liver transplantation                           | Venovenous bypass                                       | No intervention                     | 1. Mortality.<br>2. HRQoL.<br>3. Complications. |



|                                                                            |                                         |                                                                                            |                                    |                                                 |
|----------------------------------------------------------------------------|-----------------------------------------|--------------------------------------------------------------------------------------------|------------------------------------|-------------------------------------------------|
| 1<br>2<br>3<br>4<br>5<br>6<br>7<br>8<br>9                                  | People undergoing liver transplantation | Ischaemic preconditioning                                                                  | No intervention                    | 1. Mortality.<br>2. HRQoL.<br>3. Complications. |
| 10<br>11<br>12<br>13<br>14<br>15<br>16                                     | People undergoing liver transplantation | Methods of biliary reconstruction                                                          | Not applicable                     | 1. Mortality.<br>2. HRQoL.<br>3. Complications. |
| 17<br>18<br>19<br>20<br>21<br>22<br>23<br>24<br>25<br>26<br>27             | People undergoing liver transplantation | Methods of preventing bacterial sepsis and wound complications after liver transplantation | Not applicable                     | 1. Mortality.<br>2. HRQoL.<br>3. Complications. |
| 28<br>29<br>30<br>31<br>32<br>33<br>34                                     | People undergoing liver transplantation | Techniques of flushing and reperfusion                                                     | Not applicable                     | 1. Mortality.<br>2. HRQoL.<br>3. Complications. |
| 35<br>36<br>37<br>38<br>39<br>40<br>41                                     | People undergoing liver transplantation | Abdominal drainage                                                                         | No intervention                    | 1. Mortality.<br>2. HRQoL.<br>3. Complications. |
| 42<br>43<br>44<br>45<br>46<br>47                                           | People undergoing liver transplantation | Piggy-back                                                                                 | Conventional liver transplantation | 1. Mortality.<br>2. HRQoL.<br>3. Complications. |
| 48<br>49<br>50<br>51<br>52<br>53<br>54<br>55<br>56<br>57<br>58<br>59<br>60 | People undergoing liver transplantation | Methods to decrease blood loss and transfusion requirements                                | Not applicable                     | 1. Mortality.<br>2. HRQoL.<br>3. Complications. |

|                                                                            |                                                                   |                                                                         |                                                              |                                                 |
|----------------------------------------------------------------------------|-------------------------------------------------------------------|-------------------------------------------------------------------------|--------------------------------------------------------------|-------------------------------------------------|
| 1<br>2<br>3<br>4<br>5<br>6<br>7<br>8<br>9                                  | People undergoing liver transplantation                           | Antiviral prophylaxis for prevention of hepatitis C infection           | Not applicable                                               | 1. Mortality.<br>2. HRQoL.<br>3. Complications. |
| 10<br>11<br>12<br>13<br>14<br>15<br>16                                     | People undergoing liver transplantation                           | Antiviral treatment of hepatitis C infection                            | Not applicable                                               | 1. Mortality.<br>2. HRQoL.<br>3. Complications. |
| 17<br>18<br>19<br>20<br>21<br>22<br>23<br>24<br>25<br>26<br>27             | People undergoing liver transplantation for hepatitis B infection | Lamivudine or adefovir dipivoxil                                        | No intervention/other interventions including immunoglobulin | 1. Mortality.<br>2. HRQoL.<br>3. Complications. |
| 28<br>29<br>30<br>31<br>32<br>33<br>34                                     | People undergoing liver transplantation                           | Nutritional interventions                                               | Not applicable                                               | 1. Mortality.<br>2. HRQoL.<br>3. Complications. |
| 35<br>36<br>37<br>38<br>39<br>40<br>41                                     | People undergoing liver transplantation                           | Bile acids                                                              | No intervention/other interventions                          | 1. Mortality.<br>2. HRQoL.<br>3. Complications. |
| 42<br>43<br>44<br>45<br>46<br>47                                           | People undergoing liver transplantation                           | Celsior solution                                                        | UW solution                                                  | 1. Mortality.<br>2. HRQoL.<br>3. Complications. |
| 48<br>49<br>50<br>51<br>52<br>53<br>54<br>55<br>56<br>57<br>58<br>59<br>60 | People undergoing liver resection                                 | Pharmacological interventions for reducing ischaemia reperfusion injury | No intervention/other interventions                          | 1. Mortality.<br>2. HRQoL.<br>3. Complications. |

|                                                                |                                                                         |                                       |                                     |                                                 |
|----------------------------------------------------------------|-------------------------------------------------------------------------|---------------------------------------|-------------------------------------|-------------------------------------------------|
| 1<br>2<br>3<br>4<br>5<br>6<br>7<br>8<br>9                      | People undergoing liver resection                                       | Fibrin-based haemostatic agents       | No intervention/other interventions | 1. Mortality.<br>2. HRQoL.<br>3. Complications. |
| 10<br>11<br>12<br>13<br>14<br>15<br>16                         | People undergoing liver resection for colorectal liver metastases       | Neoadjuvant chemotherapy              | No intervention/other interventions | 1. Mortality.<br>2. HRQoL.<br>3. Complications. |
| 17<br>18<br>19<br>20<br>21<br>22<br>23                         | People with colorectal liver metastases                                 | Resection                             | Other interventions                 | 1. Mortality.<br>2. HRQoL.<br>3. Complications. |
| 24<br>25<br>26<br>27<br>28<br>29                               | People undergoing liver resection                                       | Ischaemic preconditioning             | No intervention                     | 1. Mortality.<br>2. HRQoL.<br>3. Complications. |
| 30<br>31<br>32<br>33<br>34<br>35<br>36                         | People undergoing liver resection                                       | Interventions for reducing blood loss | No intervention/other interventions | 1. Mortality.<br>2. HRQoL.<br>3. Complications. |
| 37<br>38<br>39<br>40<br>41<br>42<br>43                         | People undergoing liver resection                                       | Methods of decreasing infection       | No intervention/other interventions | 1. Mortality.<br>2. HRQoL.<br>3. Complications. |
| 44<br>45<br>46<br>47<br>48<br>49                               | People with hepatic node positive colorectal liver metastases           | Resection                             | No resection                        | 1. Mortality.<br>2. HRQoL.<br>3. Complications. |
| 50<br>51<br>52<br>53<br>54<br>55<br>56<br>57<br>58<br>59<br>60 | People undergoing liver resection for resectable neuroendocrine tumours | Resection                             | No resection                        | 1. Mortality.<br>2. HRQoL.<br>3. Complications. |

|                                                                |                                                                              |                                      |                                     |                                                 |
|----------------------------------------------------------------|------------------------------------------------------------------------------|--------------------------------------|-------------------------------------|-------------------------------------------------|
| 1<br>2<br>3<br>4<br>5<br>6<br>7<br>8<br>9                      | People undergoing liver resection or ablation of colorectal liver metastases | Hepatic artery adjuvant chemotherapy | No intervention/other interventions | 1. Mortality.<br>2. HRQoL.<br>3. Complications. |
| 10<br>11<br>12<br>13<br>14<br>15<br>16                         | People undergoing liver resection                                            | Laparoscopic liver resection         | Open liver resection                | 1. Mortality.<br>2. HRQoL.<br>3. Complications. |
| 17<br>18<br>19<br>20<br>21<br>22<br>23                         | People with hepatic encephalopathy                                           | Nonabsorbable disaccharides          | No intervention/other interventions | 1. Mortality.<br>2. HRQoL.<br>3. Complications. |
| 24<br>25<br>26<br>27<br>28<br>29                               | People with hepatic encephalopathy                                           | Benzodiazepine receptor antagonists  | No intervention/other interventions | 1. Mortality.<br>2. HRQoL.<br>3. Complications. |
| 30<br>31<br>32<br>33<br>34<br>35<br>36                         | People with hepatic encephalopathy                                           | Antibiotics                          | No intervention/other interventions | 1. Mortality.<br>2. HRQoL.<br>3. Complications. |
| 37<br>38<br>39<br>40<br>41<br>42<br>43                         | People with hepatic encephalopathy                                           | Dopamine agents                      | No intervention/other interventions | 1. Mortality.<br>2. HRQoL.<br>3. Complications. |
| 44<br>45<br>46<br>47<br>48<br>49                               | People with hepatic encephalopathy                                           | Rifaximin                            | No intervention/other interventions | 1. Mortality.<br>2. HRQoL.<br>3. Complications. |
| 50<br>51<br>52<br>53<br>54<br>55<br>56<br>57<br>58<br>59<br>60 | People with hepatic encephalopathy                                           | Acetyl-L-carnitine                   | No intervention/other interventions | 1. Mortality.<br>2. HRQoL.<br>3. Complications. |

|                                              |                                    |                                   |                                     |                                                 |
|----------------------------------------------|------------------------------------|-----------------------------------|-------------------------------------|-------------------------------------------------|
| 1<br>2<br>3<br>4<br>5<br>6<br>7<br>8<br>9    | People with hepatic encephalopathy | Probiotics                        | No intervention/other interventions | 1. Mortality.<br>2. HRQoL.<br>3. Complications. |
| 10<br>11<br>12<br>13<br>14<br>15<br>16       | People with hepatic encephalopathy | Naloxone                          | No intervention/other interventions | 1. Mortality.<br>2. HRQoL.<br>3. Complications. |
| 17<br>18<br>19<br>20<br>21<br>22<br>23       | People with hepatic encephalopathy | L-ornithine-L-aspartate           | No intervention/other interventions | 1. Mortality.<br>2. HRQoL.<br>3. Complications. |
| 24<br>25<br>26<br>27<br>28<br>29             | People with NAFLD                  | Pharmacological treatments        | Not applicable                      | 1. Mortality.<br>2. HRQoL.<br>3. Complications. |
| 30<br>31<br>32<br>33<br>34<br>35<br>36       | People with NAFLD                  | Herbal medicines                  | No intervention/other interventions | 1. Mortality.<br>2. HRQoL.<br>3. Complications. |
| 37<br>38<br>39<br>40<br>41<br>42<br>43       | People with NAFLD                  | Weight reduction                  | Not applicable                      | 1. Mortality.<br>2. HRQoL.<br>3. Complications. |
| 44<br>45<br>46<br>47<br>48<br>49             | People with liver metastases       | Transarterial (chemo)embolisation | No intervention/other interventions | 1. Mortality.<br>2. HRQoL.<br>3. Complications. |
| 50<br>51<br>52<br>53<br>54<br>55<br>56<br>57 | People with liver metastases       | Microwave coagulation             | No intervention/other interventions | 1. Mortality.<br>2. HRQoL.<br>3. Complications. |

|                                                                |                                                                |                                         |                                            |                                                 |
|----------------------------------------------------------------|----------------------------------------------------------------|-----------------------------------------|--------------------------------------------|-------------------------------------------------|
| 1<br>2<br>3<br>4<br>5<br>6<br>7<br>8<br>9                      | People with liver metastases                                   | Cryotherapy                             | No<br>intervention/oth<br>er interventions | 1. Mortality.<br>2. HRQoL.<br>3. Complications. |
| 10<br>11<br>12<br>13<br>14<br>15<br>16                         | People with liver metastases                                   | Radiofrequency<br>ablation              | No<br>intervention/oth<br>er interventions | 1. Mortality.<br>2. HRQoL.<br>3. Complications. |
| 17<br>18<br>19<br>20<br>21<br>22<br>23                         | People with unresectable<br>neuroendocrine liver<br>metastases | Palliative cytoreductive<br>surgery     | Other palliative<br>interventions          | 1. Mortality.<br>2. HRQoL.<br>3. Complications. |
| 24<br>25<br>26<br>27<br>28<br>29                               | People with unresectable<br>colorectal liver metastases        | Hepatic arterial<br>infusion            | Systemic<br>chemotherapy                   | 1. Mortality.<br>2. HRQoL.<br>3. Complications. |
| 30<br>31<br>32<br>33<br>34<br>35<br>36                         | People with liver metastases                                   | Electro-coagulation                     | No<br>intervention/oth<br>er interventions | 1. Mortality.<br>2. HRQoL.<br>3. Complications. |
| 37<br>38<br>39<br>40<br>41<br>42<br>43                         | People with liver metastases                                   | Percutaneous ethanol<br>injection       | No<br>intervention/oth<br>er interventions | 1. Mortality.<br>2. HRQoL.<br>3. Complications. |
| 44<br>45<br>46<br>47<br>48<br>49                               | People with unresectable<br>colorectal liver metastases        | Chemotherapy for<br>downstaging         | No<br>intervention/oth<br>er interventions | 1. Mortality.<br>2. HRQoL.<br>3. Complications. |
| 50<br>51<br>52<br>53<br>54<br>55<br>56<br>57<br>58<br>59<br>60 | People with colorectal liver<br>metastases                     | Selective internal<br>radiation therapy | No<br>intervention/oth<br>er interventions | 1. Mortality.<br>2. HRQoL.<br>3. Complications. |

|                                                                                                                                                                                                                                                                                                                                                             |                                                                        |                                    |                               |                                                 |
|-------------------------------------------------------------------------------------------------------------------------------------------------------------------------------------------------------------------------------------------------------------------------------------------------------------------------------------------------------------|------------------------------------------------------------------------|------------------------------------|-------------------------------|-------------------------------------------------|
| 1<br>2<br>3<br>4<br>5<br>6<br>7<br>8<br>9<br>10<br>11<br>12<br>13<br>14<br>15<br>16<br>17<br>18<br>19<br>20<br>21<br>22<br>23<br>24<br>25<br>26<br>27<br>28<br>29<br>30<br>31<br>32<br>33<br>34<br>35<br>36<br>37<br>38<br>39<br>40<br>41<br>42<br>43<br>44<br>45<br>46<br>47<br>48<br>49<br>50<br>51<br>52<br>53<br>54<br>55<br>56<br>57<br>58<br>59<br>60 | People with gallbladder polyp                                          | Cholecystectomy                    | No cholecystectomy            | 1. Mortality.<br>2. HRQoL.<br>3. Complications. |
|                                                                                                                                                                                                                                                                                                                                                             | People with gallbladder dyskinesia                                     | Cholecystectomy                    | No cholecystectomy            | 1. Mortality.<br>2. HRQoL.<br>3. Complications. |
|                                                                                                                                                                                                                                                                                                                                                             | People undergoing laparoscopic cholecystectomy                         | Methods of cystic duct occlusion   | Not applicable                | 1. Mortality.<br>2. HRQoL.<br>3. Complications. |
|                                                                                                                                                                                                                                                                                                                                                             | People undergoing laparoscopic cholecystectomy for acute cholecystitis | Early laparoscopic cholecystectomy | Delayed cholecystectomy       | 1. Mortality.<br>2. HRQoL.<br>3. Complications. |
|                                                                                                                                                                                                                                                                                                                                                             | People undergoing cholecystectomy                                      | Laparoscopic cholecystectomy       | Open cholecystectomy          | 1. Mortality.<br>2. HRQoL.<br>3. Complications. |
|                                                                                                                                                                                                                                                                                                                                                             | People undergoing cholecystectomy                                      | Laparoscopic cholecystectomy       | Mini-incision cholecystectomy | 1. Mortality.<br>2. HRQoL.<br>3. Complications. |
|                                                                                                                                                                                                                                                                                                                                                             | People undergoing cholecystectomy                                      | Mini-incision cholecystectomy      | Open cholecystectomy          | 1. Mortality.<br>2. HRQoL.<br>3. Complications. |
|                                                                                                                                                                                                                                                                                                                                                             | People undergoing laparoscopic cholecystectomy                         | Abdominal wall lift                | Pneumoperitoneum              | 1. Mortality.<br>2. HRQoL.<br>3. Complications. |

|                                                                                                                                                                                                                                                                                                                                                             |                                                                  |                                                           |                         |                                                 |
|-------------------------------------------------------------------------------------------------------------------------------------------------------------------------------------------------------------------------------------------------------------------------------------------------------------------------------------------------------------|------------------------------------------------------------------|-----------------------------------------------------------|-------------------------|-------------------------------------------------|
| 1<br>2<br>3<br>4<br>5<br>6<br>7<br>8<br>9<br>10<br>11<br>12<br>13<br>14<br>15<br>16<br>17<br>18<br>19<br>20<br>21<br>22<br>23<br>24<br>25<br>26<br>27<br>28<br>29<br>30<br>31<br>32<br>33<br>34<br>35<br>36<br>37<br>38<br>39<br>40<br>41<br>42<br>43<br>44<br>45<br>46<br>47<br>48<br>49<br>50<br>51<br>52<br>53<br>54<br>55<br>56<br>57<br>58<br>59<br>60 | People undergoing laparoscopic cholecystectomy                   | Abdominal drainage                                        | No drain                | 1. Mortality.<br>2. HRQoL.<br>3. Complications. |
|                                                                                                                                                                                                                                                                                                                                                             | People undergoing laparoscopic cholecystectomy for biliary colic | Early laparoscopic cholecystectomy                        | Delayed cholecystectomy | 1. Mortality.<br>2. HRQoL.<br>3. Complications. |
|                                                                                                                                                                                                                                                                                                                                                             | People undergoing laparoscopic cholecystectomy                   | Intra-peritoneal saline instillation                      | No instillation         | 1. Mortality.<br>2. HRQoL.<br>3. Complications. |
|                                                                                                                                                                                                                                                                                                                                                             | People undergoing laparoscopic cholecystectomy                   | Methods of intraperitoneal local anaesthetic instillation | Not applicable          | 1. Mortality.<br>2. HRQoL.<br>3. Complications. |
|                                                                                                                                                                                                                                                                                                                                                             | People undergoing laparoscopic cholecystectomy                   | Methods of local anaesthetic wound infiltration           | Not applicable          | 1. Mortality.<br>2. HRQoL.<br>3. Complications. |
|                                                                                                                                                                                                                                                                                                                                                             | People undergoing laparoscopic cholecystectomy                   | Three-dimensional imaging                                 | Two-dimensional imaging | 1. Mortality.<br>2. HRQoL.<br>3. Complications. |
|                                                                                                                                                                                                                                                                                                                                                             | People with asymptomatic gallstones                              | Cholecystectomy                                           | No cholecystectomy      | 1. Mortality.<br>2. HRQoL.<br>3. Complications. |
|                                                                                                                                                                                                                                                                                                                                                             | People undergoing open cholecystectomy                           | Abdominal drainage                                        | No drain                | 1. Mortality.<br>2. HRQoL.<br>3. Complications. |



|                                                                                        |                                                |                                                                                 |                                    |                                                 |
|----------------------------------------------------------------------------------------|------------------------------------------------|---------------------------------------------------------------------------------|------------------------------------|-------------------------------------------------|
| 1<br>2<br>3<br>4<br>5<br>6<br>7<br>8<br>9                                              | People undergoing laparoscopic cholecystectomy | Robotic assistant                                                               | Human assistant                    | 1. Mortality.<br>2. HRQoL.<br>3. Complications. |
| 10<br>11<br>12<br>13<br>14<br>15<br>16                                                 | People undergoing laparoscopic cholecystectomy | Methods of gallbladder dissection                                               | Not applicable                     | 1. Mortality.<br>2. HRQoL.<br>3. Complications. |
| 17<br>18<br>19<br>20<br>21<br>22<br>23<br>24<br>25                                     | People undergoing laparoscopic cholecystectomy | Low pressure pneumoperitoneum                                                   | Standard pressure pneumoperitoneum | 1. Mortality.<br>2. HRQoL.<br>3. Complications. |
| 26<br>27<br>28<br>29<br>30<br>31<br>32                                                 | People undergoing laparoscopic cholecystectomy | Education of patients                                                           | Standard care                      | 1. Mortality.<br>2. HRQoL.<br>3. Complications. |
| 33<br>34<br>35<br>36<br>37<br>38                                                       | People undergoing laparoscopic cholecystectomy | Miniports                                                                       | Standard ports                     | 1. Mortality.<br>2. HRQoL.<br>3. Complications. |
| 39<br>40<br>41<br>42<br>43<br>44<br>45                                                 | People undergoing laparoscopic cholecystectomy | Number of ports                                                                 | Not applicable                     | 1. Mortality.<br>2. HRQoL.<br>3. Complications. |
| 46<br>47<br>48<br>49<br>50<br>51<br>52<br>53<br>54<br>55<br>56<br>57<br>58<br>59<br>60 | People undergoing laparoscopic cholecystectomy | Pharmacological interventions for prevention or treatment of postoperative pain | Not applicable                     | 1. Mortality.<br>2. HRQoL.<br>3. Complications. |

|                                                                                                                                                                                                                                                                                                                                                             |                                                                                         |                                             |                                         |                                                 |
|-------------------------------------------------------------------------------------------------------------------------------------------------------------------------------------------------------------------------------------------------------------------------------------------------------------------------------------------------------------|-----------------------------------------------------------------------------------------|---------------------------------------------|-----------------------------------------|-------------------------------------------------|
| 1<br>2<br>3<br>4<br>5<br>6<br>7<br>8<br>9<br>10<br>11<br>12<br>13<br>14<br>15<br>16<br>17<br>18<br>19<br>20<br>21<br>22<br>23<br>24<br>25<br>26<br>27<br>28<br>29<br>30<br>31<br>32<br>33<br>34<br>35<br>36<br>37<br>38<br>39<br>40<br>41<br>42<br>43<br>44<br>45<br>46<br>47<br>48<br>49<br>50<br>51<br>52<br>53<br>54<br>55<br>56<br>57<br>58<br>59<br>60 | People undergoing laparoscopic cholecystectomy                                          | Glucocorticoids                             | No intervention                         | 1. Mortality.<br>2. HRQoL.<br>3. Complications. |
|                                                                                                                                                                                                                                                                                                                                                             | People who have undergone endoscopic sphincterotomy for gallstone related complications | Early cholecystectomy                       | Delayed or no cholecystectomy           | 1. Mortality.<br>2. HRQoL.<br>3. Complications. |
|                                                                                                                                                                                                                                                                                                                                                             | People undergoing laparoscopic cholecystectomy                                          | Antibiotic prophylaxis                      | Not applicable                          | 1. Mortality.<br>2. HRQoL.<br>3. Complications. |
|                                                                                                                                                                                                                                                                                                                                                             | People undergoing laparoscopic cholecystectomy                                          | Day surgery                                 | Overnight stay                          | 1. Mortality.<br>2. HRQoL.<br>3. Complications. |
|                                                                                                                                                                                                                                                                                                                                                             | People undergoing day surgery laparoscopic cholecystectomy                              | Anaesthetic regimens                        | Not applicable                          | 1. Mortality.<br>2. HRQoL.<br>3. Complications. |
|                                                                                                                                                                                                                                                                                                                                                             | People with common bile duct stones undergoing laparoscopic cholecystectomy             | Per-operative endoscopic sphincterotomy     | Pre-operative endoscopic sphincterotomy | 1. Mortality.<br>2. HRQoL.<br>3. Complications. |
|                                                                                                                                                                                                                                                                                                                                                             | People with suspected bile duct stenosis                                                | Magnetic resonance cholangiopancreatography | Not applicable                          | 1. Mortality.<br>2. HRQoL.<br>3. Complications. |

|                                                       |                                                    |                                                |                                             |                                                 |
|-------------------------------------------------------|----------------------------------------------------|------------------------------------------------|---------------------------------------------|-------------------------------------------------|
| 1<br>2<br>3<br>4<br>5<br>6<br>7<br>8<br>9<br>10<br>11 | People with suspected bile duct stones             | Endoscopic ultrasound                          | Magnetic resonance cholangiopancreatography | 1. Mortality.<br>2. HRQoL.<br>3. Complications. |
| 12<br>13<br>14<br>15<br>16<br>17<br>18                | People with suspected bile duct stones             | Endoscopic retrograde cholangiopancreatography | Intraoperative cholangiography              | 1. Mortality.<br>2. HRQoL.<br>3. Complications. |
| 19<br>20<br>21<br>22<br>23<br>24<br>25                | People with suspected bile duct stones             | Liver function tests                           | Transabdominal ultrasound                   | 1. Mortality.<br>2. HRQoL.<br>3. Complications. |
| 26<br>27<br>28<br>29<br>30<br>31<br>32                | People undergoing surgery for biliary tract cancer | Pre-operative biliary stenting                 | No stenting                                 | 1. Mortality.<br>2. HRQoL.<br>3. Complications. |
| 33<br>34<br>35<br>36<br>37<br>38                      | People with uncomplicated amoebic liver abscess    | Percutaneous procedure plus metronidazole      | Metronidazole alone                         | 1. Mortality.<br>2. HRQoL.<br>3. Complications. |
| 39<br>40<br>41<br>42<br>43<br>44<br>45                | People with benign liver tumours                   | Liver resection                                | No liver resection                          | 1. Mortality.<br>2. HRQoL.<br>3. Complications. |
| 46<br>47<br>48<br>49<br>50<br>51<br>52                | People with sphincter of oddi dysfunction          | Sphincterotomy                                 | No sphincterotomy                           | 1. Mortality.<br>2. HRQoL.<br>3. Complications. |
| 53<br>54<br>55<br>56<br>57<br>58<br>59<br>60          | People with cirrhosis                              | Colchicine                                     | No intervention/other interventions         | 1. Mortality.<br>2. HRQoL.<br>3. Complications. |

|                                                                                                                                                                                                                                                                                                                                                             |                                                                    |                                     |                                                 |                                                 |
|-------------------------------------------------------------------------------------------------------------------------------------------------------------------------------------------------------------------------------------------------------------------------------------------------------------------------------------------------------------|--------------------------------------------------------------------|-------------------------------------|-------------------------------------------------|-------------------------------------------------|
| 1<br>2<br>3<br>4<br>5<br>6<br>7<br>8<br>9<br>10<br>11<br>12<br>13<br>14<br>15<br>16<br>17<br>18<br>19<br>20<br>21<br>22<br>23<br>24<br>25<br>26<br>27<br>28<br>29<br>30<br>31<br>32<br>33<br>34<br>35<br>36<br>37<br>38<br>39<br>40<br>41<br>42<br>43<br>44<br>45<br>46<br>47<br>48<br>49<br>50<br>51<br>52<br>53<br>54<br>55<br>56<br>57<br>58<br>59<br>60 | People with blunt liver injury                                     | Non-surgical treatment              | Surgery                                         | 1. Mortality.<br>2. HRQoL.<br>3. Complications. |
| People with common bile duct stones                                                                                                                                                                                                                                                                                                                         | Surgical treatment                                                 | Endoscopic intervention             | 1. Mortality.<br>2. HRQoL.<br>3. Complications. |                                                 |
| People at risk of gallstones                                                                                                                                                                                                                                                                                                                                | Lifestyle: Diets for primary prevention of gallstones              | Not applicable                      | 1. Mortality.<br>2. HRQoL.<br>3. Complications. |                                                 |
| People at risk of gallstones                                                                                                                                                                                                                                                                                                                                | Pharmacological interventions for primary prevention of gallstones | Not applicable                      | 1. Mortality.<br>2. HRQoL.<br>3. Complications. |                                                 |
| People with common bile duct stones                                                                                                                                                                                                                                                                                                                         | Sphincteroplasty                                                   | Sphincterotomy                      | 1. Mortality.<br>2. HRQoL.<br>3. Complications. |                                                 |
| People with biliary colic                                                                                                                                                                                                                                                                                                                                   | Bile acids                                                         | No intervention/other interventions | 1. Mortality.<br>2. HRQoL.<br>3. Complications. |                                                 |
| People with biliary colic                                                                                                                                                                                                                                                                                                                                   | Non-steroidal anti-inflammatory drugs                              | No intervention/other interventions | 1. Mortality.<br>2. HRQoL.<br>3. Complications. |                                                 |
| People with chronic hepatitis C                                                                                                                                                                                                                                                                                                                             | Pharmacological treatments                                         | Not applicable                      | 1. Mortality.<br>2. HRQoL.<br>3. Complications. |                                                 |

|                                                                                                                                                                                                                                                                                                                                                             |                                 |                                                 |                                     |                                                 |
|-------------------------------------------------------------------------------------------------------------------------------------------------------------------------------------------------------------------------------------------------------------------------------------------------------------------------------------------------------------|---------------------------------|-------------------------------------------------|-------------------------------------|-------------------------------------------------|
| 1<br>2<br>3<br>4<br>5<br>6<br>7<br>8<br>9<br>10<br>11<br>12<br>13<br>14<br>15<br>16<br>17<br>18<br>19<br>20<br>21<br>22<br>23<br>24<br>25<br>26<br>27<br>28<br>29<br>30<br>31<br>32<br>33<br>34<br>35<br>36<br>37<br>38<br>39<br>40<br>41<br>42<br>43<br>44<br>45<br>46<br>47<br>48<br>49<br>50<br>51<br>52<br>53<br>54<br>55<br>56<br>57<br>58<br>59<br>60 | People with chronic hepatitis B | Pharmacological treatments                      | Not applicable                      | 1. Mortality.<br>2. HRQoL.<br>3. Complications. |
|                                                                                                                                                                                                                                                                                                                                                             | People with chronic hepatitis D | Pharmacological treatments                      | Not applicable                      | 1. Mortality.<br>2. HRQoL.<br>3. Complications. |
|                                                                                                                                                                                                                                                                                                                                                             | People exposed to hepatitis A   | Post-exposure vaccines                          | Not applicable                      | 1. Mortality.<br>2. HRQoL.<br>3. Complications. |
|                                                                                                                                                                                                                                                                                                                                                             | General population              | Immunisation against Hepatitis A                | No immunisation                     | 1. Mortality.<br>2. HRQoL.<br>3. Complications. |
|                                                                                                                                                                                                                                                                                                                                                             | People exposed to hepatitis A   | Post-exposure immunoglobulins                   | Not applicable                      | 1. Mortality.<br>2. HRQoL.<br>3. Complications. |
|                                                                                                                                                                                                                                                                                                                                                             | People with biliary stent       | Ursodeoxycholic acid to prevent stent occlusion | No intervention/other interventions | 1. Mortality.<br>2. HRQoL.<br>3. Complications. |
|                                                                                                                                                                                                                                                                                                                                                             | People with acute hepatitis B   | Pharmacological treatments                      | Not applicable                      | 1. Mortality.<br>2. HRQoL.<br>3. Complications. |
|                                                                                                                                                                                                                                                                                                                                                             | Healthcare professionals        | Hepatitis B vaccination                         | Not applicable                      | 1. Mortality.<br>2. HRQoL.<br>3. Complications. |

|                                                                  |                         |                                     |                                                 |
|------------------------------------------------------------------|-------------------------|-------------------------------------|-------------------------------------------------|
| Pregnant women with Hepatitis B                                  | Immunoglobulins         | No intervention/other interventions | 1. Mortality.<br>2. HRQoL.<br>3. Complications. |
| Newborns of HBSAg (hepatitis B surface antigen) positive mothers | Immunisation            | No intervention/other interventions | 1. Mortality.<br>2. HRQoL.<br>3. Complications. |
| People with chronic hepatitis B                                  | Medicinal herbs         | No intervention/other interventions | 1. Mortality.<br>2. HRQoL.<br>3. Complications. |
| Asymptomatic Hepatitis B carriers                                | Medicinal herbs         | No intervention/other interventions | 1. Mortality.<br>2. HRQoL.<br>3. Complications. |
| People with chronic hepatitis B                                  | Acupuncture             | No intervention/other interventions | 1. Mortality.<br>2. HRQoL.<br>3. Complications. |
| People with acute hepatitis B                                    | Medicinal herbs         | No intervention/other interventions | 1. Mortality.<br>2. HRQoL.<br>3. Complications. |
| General population                                               | Hepatitis B vaccination | Not applicable                      | 1. Mortality.<br>2. HRQoL.<br>3. Complications. |
| Pregnant women with Hepatitis B                                  | Lamivudine              | No intervention/other interventions | 1. Mortality.<br>2. HRQoL.<br>3. Complications. |

|                                           |                                                           |                                               |                                     |                                                 |
|-------------------------------------------|-----------------------------------------------------------|-----------------------------------------------|-------------------------------------|-------------------------------------------------|
| 1<br>2<br>3<br>4<br>5<br>6<br>7<br>8<br>9 | People with HIV infection                                 | Hepatitis B vaccination                       | Not applicable                      | 1. Mortality.<br>2. HRQoL.<br>3. Complications. |
| 10<br>11<br>12<br>13<br>14<br>15<br>16    | People who have received Hepatitis B vaccination          | Booster dose                                  | No booster dose                     | 1. Mortality.<br>2. HRQoL.<br>3. Complications. |
| 17<br>18<br>19<br>20<br>21<br>22<br>23    | Pregnant women with Hepatitis B                           | Hepatitis B vaccination                       | No intervention/other interventions | 1. Mortality.<br>2. HRQoL.<br>3. Complications. |
| 24<br>25<br>26<br>27<br>28<br>29          | People with renal failure                                 | Hepatitis B vaccination                       | No intervention/other interventions | 1. Mortality.<br>2. HRQoL.<br>3. Complications. |
| 30<br>31<br>32<br>33<br>34<br>35<br>36    | People with chronic hepatitis C and peripheral neuropathy | Treatments                                    | Not applicable                      | 1. Mortality.<br>2. HRQoL.<br>3. Complications. |
| 37<br>38<br>39<br>40<br>41<br>42<br>43    | People in haemodialysis units                             | Isolation to prevent Hepatitis C transmission | No isolation                        | 1. Mortality.<br>2. HRQoL.<br>3. Complications. |
| 44<br>45<br>46<br>47<br>48<br>49<br>50    | People with acute hepatitis C                             | Pharmacological treatments                    | Not applicable                      | 1. Mortality.<br>2. HRQoL.<br>3. Complications. |
| 51<br>52<br>53<br>54<br>55<br>56<br>57    | People with chronic hepatitis C and HIV                   | Antiviral treatment                           | Not applicable                      | 1. Mortality.<br>2. HRQoL.<br>3. Complications. |

|                                              |                                                          |                                 |                                     |                                                 |
|----------------------------------------------|----------------------------------------------------------|---------------------------------|-------------------------------------|-------------------------------------------------|
| 1<br>2<br>3<br>4<br>5<br>6<br>7<br>8<br>9    | People with chronic hepatitis C                          | Medicinal herbs                 | No intervention/other interventions | 1. Mortality.<br>2. HRQoL.<br>3. Complications. |
| 10<br>11<br>12<br>13<br>14<br>15<br>16       | Pregnant women with Hepatitis B                          | Caesarean section               | Vaginal delivery                    | 1. Mortality.<br>2. HRQoL.<br>3. Complications. |
| 17<br>18<br>19<br>20<br>21<br>22<br>23       | People with chronic hepatitis C with vasculitis          | Treatments                      | Not applicable                      | 1. Mortality.<br>2. HRQoL.<br>3. Complications. |
| 24<br>25<br>26<br>27<br>28<br>29             | People with chronic hepatitis C                          | Staging of liver disease        | Not applicable                      | 1. Mortality.<br>2. HRQoL.<br>3. Complications. |
| 30<br>31<br>32<br>33<br>34<br>35<br>36       | People with primary biliary cholangitis and osteoporosis | Biphosphonates                  | No intervention/other interventions | 1. Mortality.<br>2. HRQoL.<br>3. Complications. |
| 37<br>38<br>39<br>40<br>41<br>42<br>43       | People with primary biliary cholangitis and osteoporosis | Hormonal replacement therapy    | No intervention/other interventions | 1. Mortality.<br>2. HRQoL.<br>3. Complications. |
| 44<br>45<br>46<br>47<br>48<br>49             | People with bleeding oesophageal varices                 | People with portosystemic shunt | No intervention/other interventions | 1. Mortality.<br>2. HRQoL.<br>3. Complications. |
| 50<br>51<br>52<br>53<br>54<br>55<br>56<br>57 | People with hepatorenal syndrome                         | Terlipressin                    | No intervention/other interventions | 1. Mortality.<br>2. HRQoL.<br>3. Complications. |



|                                                                |                                                                   |                                                |                                     |                                                 |
|----------------------------------------------------------------|-------------------------------------------------------------------|------------------------------------------------|-------------------------------------|-------------------------------------------------|
| 1<br>2<br>3<br>4<br>5<br>6<br>7<br>8<br>9                      | People with hepatorenal syndrome                                  | Transjugular intrahepatic portosystemic shunts | No intervention/other interventions | 1. Mortality.<br>2. HRQoL.<br>3. Complications. |
| 10<br>11<br>12<br>13<br>14<br>15<br>16                         | People undergoing common bile duct exploration                    | T-tube                                         | No T-tube                           | 1. Mortality.<br>2. HRQoL.<br>3. Complications. |
| 17<br>18<br>19<br>20<br>21<br>22<br>23                         | People with acute calculous cholecystitis (high risk)             | Percutaneous cholecystostomy                   | No intervention/other interventions | 1. Mortality.<br>2. HRQoL.<br>3. Complications. |
| 24<br>25<br>26<br>27<br>28<br>29                               | People undergoing liver resection                                 | Enhanced recovery protocols                    | Standard intervention               | 1. Mortality.<br>2. HRQoL.<br>3. Complications. |
| 30<br>31<br>32<br>33<br>34<br>35<br>36                         | People undergoing liver transplantation                           | Perfusion techniques in donor                  | Not applicable                      | 1. Mortality.<br>2. HRQoL.<br>3. Complications. |
| 37<br>38<br>39<br>40<br>41<br>42<br>43                         | People with gallstones                                            | Chinese herbs                                  | Not applicable                      | 1. Mortality.<br>2. HRQoL.<br>3. Complications. |
| 44<br>45<br>46<br>47<br>48<br>49                               | Pregnant women with cholestasis                                   | Interventions                                  | Not applicable                      | 1. Mortality.<br>2. HRQoL.<br>3. Complications. |
| 50<br>51<br>52<br>53<br>54<br>55<br>56<br>57<br>58<br>59<br>60 | New-borns and infants receiving parenteral nutrition and jaundice | Pharmacological interventions                  | Not applicable                      | 1. Mortality.<br>2. HRQoL.<br>3. Complications. |

|                                                                |                                                                   |                                        |                                     |                                                 |
|----------------------------------------------------------------|-------------------------------------------------------------------|----------------------------------------|-------------------------------------|-------------------------------------------------|
| 1<br>2<br>3<br>4<br>5<br>6<br>7<br>8<br>9                      | New-borns and infants receiving parenteral nutrition and jaundice | Alternate interventions                | Not applicable                      | 1. Mortality.<br>2. HRQoL.<br>3. Complications. |
| 10<br>11<br>12<br>13<br>14<br>15<br>16                         | People with sickle cell disease and intrahepatic cholestasis      | Interventions                          | Not applicable                      | 1. Mortality.<br>2. HRQoL.<br>3. Complications. |
| 17<br>18<br>19<br>20<br>21<br>22                               | People with liver disease with upper gastrointestinal bleeding    | Human recombinant activated factor VII | No intervention/other interventions | 1. Mortality.<br>2. HRQoL.<br>3. Complications. |
| 23<br>24<br>25<br>26<br>27<br>28<br>29                         | People with liver disease with upper gastrointestinal bleeding    | Vitamin K                              | No intervention/other interventions | 1. Mortality.<br>2. HRQoL.<br>3. Complications. |
| 30<br>31<br>32<br>33<br>34<br>35<br>36                         | People with liver disease with upper gastrointestinal bleeding    | Antifibrinolytic amino acids           | No intervention/other interventions | 1. Mortality.<br>2. HRQoL.<br>3. Complications. |
| 37<br>38<br>39<br>40<br>41<br>42<br>43                         | People with liver disease                                         | Antioxidant supplements                | No intervention                     | 1. Mortality.<br>2. HRQoL.<br>3. Complications. |
| 44<br>45<br>46<br>47<br>48<br>49                               | People with liver disease                                         | Vitamin D supplements                  | No intervention                     | 1. Mortality.<br>2. HRQoL.<br>3. Complications. |
| 50<br>51<br>52<br>53<br>54<br>55<br>56<br>57<br>58<br>59<br>60 | People with liver disease                                         | Lifestyle: Nutritional support         | Not applicable                      | 1. Mortality.<br>2. HRQoL.<br>3. Complications. |

|                                                                                                                      |                                                                                           |                                                                                 |                                                                                    |                                                 |
|----------------------------------------------------------------------------------------------------------------------|-------------------------------------------------------------------------------------------|---------------------------------------------------------------------------------|------------------------------------------------------------------------------------|-------------------------------------------------|
| 1<br>2<br>3<br>4<br>5<br>6<br>7<br>8<br>9<br>10<br>11                                                                | People with adverse events related to chemoarterial embolisation for primary liver cancer | Chinese herbs                                                                   | Not applicable                                                                     | 1. Mortality.<br>2. HRQoL.<br>3. Complications. |
| 12<br>13<br>14<br>15<br>16<br>17<br>18<br>19<br>20<br>21<br>22<br>23<br>24<br>25<br>26<br>27                         | People with uncomplicated hepatic hydatid cysts                                           | Percutaneous needle aspiration, injection, and re-aspiration with benzimidazole | Percutaneous needle aspiration, injection, and re-aspiration without benzimidazole | 1. Mortality.<br>2. HRQoL.<br>3. Complications. |
| 28<br>29<br>30<br>31<br>32<br>33<br>34                                                                               | People with gallbladder cancer                                                            | Chemotherapy                                                                    | Not applicable                                                                     | 1. Mortality.<br>2. HRQoL.<br>3. Complications. |
| 35<br>36<br>37<br>38<br>39<br>40                                                                                     | People with acute or acute-on-chronic liver failure                                       | Granulocyte-colony stimulating factor                                           | No intervention/other interventions                                                | 1. Mortality.<br>2. HRQoL.<br>3. Complications. |
| 41<br>42<br>43<br>44<br>45<br>46<br>47<br>48<br>49<br>50<br>51<br>52<br>53<br>54<br>55<br>56<br>57<br>58<br>59<br>60 | People with common bile duct stones                                                       | Early laparoscopic cholecystectomy following endoscopic sphincterotomy          | Delayed laparoscopic cholecystectomy following endoscopic sphincterotomy           | 1. Mortality.<br>2. HRQoL.<br>3. Complications. |

|                                                                                                                                                                                                                                                                                                                                                             |                                                    |                                                |                                                 |                                                 |
|-------------------------------------------------------------------------------------------------------------------------------------------------------------------------------------------------------------------------------------------------------------------------------------------------------------------------------------------------------------|----------------------------------------------------|------------------------------------------------|-------------------------------------------------|-------------------------------------------------|
| 1<br>2<br>3<br>4<br>5<br>6<br>7<br>8<br>9<br>10<br>11<br>12<br>13<br>14<br>15<br>16<br>17<br>18<br>19<br>20<br>21<br>22<br>23<br>24<br>25<br>26<br>27<br>28<br>29<br>30<br>31<br>32<br>33<br>34<br>35<br>36<br>37<br>38<br>39<br>40<br>41<br>42<br>43<br>44<br>45<br>46<br>47<br>48<br>49<br>50<br>51<br>52<br>53<br>54<br>55<br>56<br>57<br>58<br>59<br>60 | People with gallstones and common-bile duct stones | Model of service delivery                      | Not applicable                                  | 1. Mortality.<br>2. HRQoL.<br>3. Complications. |
| People undergoing cholecystectomy                                                                                                                                                                                                                                                                                                                           | Routine intraoperative cholangiography             | selective cholangiography                      | 1. Mortality.<br>2. HRQoL.<br>3. Complications. |                                                 |
| People with gallstone pancreatitis                                                                                                                                                                                                                                                                                                                          | Early cholecystectomy                              | Delayed cholecystectomy                        | 1. Mortality.<br>2. HRQoL.<br>3. Complications. |                                                 |
| People at risk of gallstones                                                                                                                                                                                                                                                                                                                                | Non-pharmacological interventions                  | Not applicable                                 | 1. Mortality.<br>2. HRQoL.<br>3. Complications. |                                                 |
| People with biliary obstruction due to cholangiocarcinoma                                                                                                                                                                                                                                                                                                   | Endoscopic bipolar radiofrequency ablation         | Other interventions                            | 1. Mortality.<br>2. HRQoL.<br>3. Complications. |                                                 |
| People with colorectal liver metastases                                                                                                                                                                                                                                                                                                                     | Radiofrequency ablation                            | Other interventions                            | 1. Mortality.<br>2. HRQoL.<br>3. Complications. |                                                 |
| People with suspected bile leak                                                                                                                                                                                                                                                                                                                             | Magnetic resonance cholangiopancreatography        | Endoscopic retrograde cholangiopancreatography | 1. Mortality.<br>2. HRQoL.<br>3. Complications. |                                                 |
| People with cholangitis                                                                                                                                                                                                                                                                                                                                     | Antibiotics                                        | Not applicable                                 | 1. Mortality.<br>2. HRQoL.<br>3. Complications. |                                                 |

|                                                                |                                                     |                                                               |                |                                                 |
|----------------------------------------------------------------|-----------------------------------------------------|---------------------------------------------------------------|----------------|-------------------------------------------------|
| 1<br>2<br>3<br>4<br>5<br>6<br>7<br>8<br>9                      | People with suspected focal liver lesions           | Imaging modalities to distinguish focal liver lesions         | Not applicable | 1. Mortality.<br>2. HRQoL.<br>3. Complications. |
| 10<br>11<br>12<br>13<br>14<br>15<br>16                         | People with liver cancer who have undergone surgery | Optimal follow-up regimen to detect early recurrence          | Not applicable | 1. Mortality.<br>2. HRQoL.<br>3. Complications. |
| 17<br>18<br>19<br>20<br>21<br>22<br>23                         | People undergoing laparoscopic cholecystectomy      | Evidence-based pain relief protocol                           | Standard care  | 1. Mortality.<br>2. HRQoL.<br>3. Complications. |
| 24<br>25<br>26<br>27<br>28<br>29                               | People undergoing liver and bile duct resection     | Evidence-based pain relief protocol                           | Standard care  | 1. Mortality.<br>2. HRQoL.<br>3. Complications. |
| 30<br>31<br>32<br>33<br>34<br>35<br>36                         | People with suspected gallbladder polyp             | Imaging modalities to confirm diagnosis of gallbladder polyp  | Not applicable | 1. Mortality.<br>2. HRQoL.<br>3. Complications. |
| 37<br>38<br>39<br>40<br>41<br>42<br>43                         | People with gallbladder polyp                       | Imaging modalities to distinguish nature of gallbladder polyp | Not applicable | 1. Mortality.<br>2. HRQoL.<br>3. Complications. |
| 44<br>45<br>46<br>47<br>48<br>49                               | People with suspected gallstones                    | Methods to confirm diagnosis of gallstone                     | Not applicable | 1. Mortality.<br>2. HRQoL.<br>3. Complications. |
| 50<br>51<br>52<br>53<br>54<br>55<br>56<br>57<br>58<br>59<br>60 | People with suspected acute cholecystitis           | Methods to confirm diagnosis of acute cholecystitis           | Not applicable | 1. Mortality.<br>2. HRQoL.<br>3. Complications. |

|                                                                                                                                                                                                                                                                                                                                                             |                                                     |                                                  |                |                                                 |
|-------------------------------------------------------------------------------------------------------------------------------------------------------------------------------------------------------------------------------------------------------------------------------------------------------------------------------------------------------------|-----------------------------------------------------|--------------------------------------------------|----------------|-------------------------------------------------|
| 1<br>2<br>3<br>4<br>5<br>6<br>7<br>8<br>9<br>10<br>11<br>12<br>13<br>14<br>15<br>16<br>17<br>18<br>19<br>20<br>21<br>22<br>23<br>24<br>25<br>26<br>27<br>28<br>29<br>30<br>31<br>32<br>33<br>34<br>35<br>36<br>37<br>38<br>39<br>40<br>41<br>42<br>43<br>44<br>45<br>46<br>47<br>48<br>49<br>50<br>51<br>52<br>53<br>54<br>55<br>56<br>57<br>58<br>59<br>60 | People with suspected gallbladder dyskinesia        | Methods to confirm gallbladder dyskinesia        | Not applicable | 1. Mortality.<br>2. HRQoL.<br>3. Complications. |
|                                                                                                                                                                                                                                                                                                                                                             | People with suspected Sphincter of Oddi dysfunction | Methods to confirm Sphincter of Oddi dysfunction | Not applicable | 1. Mortality.<br>2. HRQoL.<br>3. Complications. |
|                                                                                                                                                                                                                                                                                                                                                             | People at risk of gallstones                        | Motivational interviewing for lifestyle changes  | standard care  | 1. Mortality.<br>2. HRQoL.<br>3. Complications. |
|                                                                                                                                                                                                                                                                                                                                                             | People with gallstones                              | Motivational interviewing for lifestyle changes  | standard care  | 1. Mortality.<br>2. HRQoL.<br>3. Complications. |
|                                                                                                                                                                                                                                                                                                                                                             | People at risk of NAFLD                             | Motivational interviewing for lifestyle changes  | standard care  | 1. Mortality.<br>2. HRQoL.<br>3. Complications. |
|                                                                                                                                                                                                                                                                                                                                                             | People with NAFLD                                   | Motivational interviewing for lifestyle changes  | standard care  | 1. Mortality.<br>2. HRQoL.<br>3. Complications. |
|                                                                                                                                                                                                                                                                                                                                                             | People undergoing liver resection for liver cancer  | Imaging modalities to confirm resectability      | Not applicable | 1. Mortality.<br>2. HRQoL.<br>3. Complications. |
|                                                                                                                                                                                                                                                                                                                                                             | People undergoing surgery for biliary tract cancer  | Imaging modalities to confirm resectability      | Not applicable | 1. Mortality.<br>2. HRQoL.<br>3. Complications. |

|                                                                                                                                                                                                                                                                                                                                                             |                                                               |                                             |                                                 |                                                 |
|-------------------------------------------------------------------------------------------------------------------------------------------------------------------------------------------------------------------------------------------------------------------------------------------------------------------------------------------------------------|---------------------------------------------------------------|---------------------------------------------|-------------------------------------------------|-------------------------------------------------|
| 1<br>2<br>3<br>4<br>5<br>6<br>7<br>8<br>9<br>10<br>11<br>12<br>13<br>14<br>15<br>16<br>17<br>18<br>19<br>20<br>21<br>22<br>23<br>24<br>25<br>26<br>27<br>28<br>29<br>30<br>31<br>32<br>33<br>34<br>35<br>36<br>37<br>38<br>39<br>40<br>41<br>42<br>43<br>44<br>45<br>46<br>47<br>48<br>49<br>50<br>51<br>52<br>53<br>54<br>55<br>56<br>57<br>58<br>59<br>60 | People undergoing liver resection                             | Imaging modalities to confirm resectability | Not applicable                                  | 1. Mortality.<br>2. HRQoL.<br>3. Complications. |
| People undergoing liver transplantation for hepatocellular carcinoma                                                                                                                                                                                                                                                                                        | Imaging modalities to confirm that cancer is limited to liver | Not applicable                              | 1. Mortality.<br>2. HRQoL.<br>3. Complications. |                                                 |
| People undergoing liver transplantation for hepatocellular carcinoma                                                                                                                                                                                                                                                                                        | Bridging ablative therapies                                   | Standard care                               | 1. Mortality.<br>2. HRQoL.<br>3. Complications. |                                                 |
| People undergoing liver transplantation for hepatocellular carcinoma                                                                                                                                                                                                                                                                                        | Goal-directed therapy                                         | Standard care                               | 1. Mortality.<br>2. HRQoL.<br>3. Complications. |                                                 |
| People with gallstones                                                                                                                                                                                                                                                                                                                                      | Direct access surgery (without seeing a specialist)           | Standard care                               | 1. Mortality.<br>2. HRQoL.<br>3. Complications. |                                                 |
| People with benign liver and gallbladder conditions                                                                                                                                                                                                                                                                                                         | Nurse-led care                                                | Standard care                               | 1. Mortality.<br>2. HRQoL.<br>3. Complications. |                                                 |
| People with sphincter of oddi dysfunction                                                                                                                                                                                                                                                                                                                   | Pharmacological interventions                                 | Standard care                               | 1. Mortality.<br>2. HRQoL.<br>3. Complications. |                                                 |
| People with sphincter of oddi dysfunction                                                                                                                                                                                                                                                                                                                   | Psychological counselling                                     | Standard care                               | 1. Mortality.<br>2. HRQoL.<br>3. Complications. |                                                 |

|                                                                |                                             |                                                            |                |                                                                     |
|----------------------------------------------------------------|---------------------------------------------|------------------------------------------------------------|----------------|---------------------------------------------------------------------|
| 1<br>2<br>3<br>4<br>5<br>6<br>7<br>8<br>9                      | People with biliary stricture               | Different diagnostic tests                                 | Not applicable | 1. Mortality.<br>2. HRQoL.<br>3. Complications.                     |
| 10<br>11<br>12<br>13<br>14<br>15<br>16                         | People with gallstones                      | Routine magnetic resonance cholangio pancreatography       | Standard care  | 1. Mortality.<br>2. HRQoL.<br>3. Complications.                     |
| 17<br>18<br>19<br>20<br>21<br>22<br>23<br>24<br>25<br>26<br>27 | People with liver and gallbladder disorders | Methods to improve understanding of evidence               | Not applicable | 1. Improved knowledge.<br>2. Better involvement in decision making. |
| 28<br>29<br>30<br>31<br>32<br>33<br>34                         | People undergoing liver transplantation     | Routine fat-assessment in donor livers                     | Standard care  | 1. Mortality.<br>2. HRQoL.<br>3. Complications.                     |
| 35<br>36<br>37<br>38<br>39<br>40                               | People with NAFLD and obesity               | Routine anti-obesity surgery                               | Standard care  | 1. Mortality.<br>2. HRQoL.<br>3. Complications.                     |
| 41<br>42<br>43<br>44<br>45<br>46<br>47<br>48<br>49             | People with severe polycystic liver disease | Pharmacological interventions to improve functional volume | Standard care  | 1. Mortality.<br>2. HRQoL.<br>3. Complications.                     |
| 50<br>51<br>52<br>53<br>54<br>55<br>56<br>57<br>58<br>59<br>60 | People with liver disease                   | Interventions to achieve palliation                        | Not applicable | 1. Palliation.                                                      |



|                                                    |                                                                                  |                                                           |                 |                                                                   |
|----------------------------------------------------|----------------------------------------------------------------------------------|-----------------------------------------------------------|-----------------|-------------------------------------------------------------------|
| 1<br>2<br>3<br>4<br>5<br>6<br>7<br>8<br>9          | People with liver disease                                                        | Interventions to achieve symptom control                  | Not applicable  | Symptom control                                                   |
| 10<br>11<br>12<br>13                               | People with liver disease                                                        | Interventions to improve quality of life                  | Not applicable  | Quality of life                                                   |
| 14<br>15<br>16<br>17<br>18<br>19<br>20<br>21<br>22 | Healthcare professionals dealing with people with primary sclerosing cholangitis | Education of healthcare professionals about liver disease | Standard care   | 1. Early recognition.<br>2. Appropriate treatment.                |
| 23<br>24<br>25<br>26<br>27<br>28<br>29             | People with Crohn's disease                                                      | Methods for screening for primary sclerosing cholangitis  | Not applicable  | Diagnosis of primary sclerosing cholangitis                       |
| 30<br>31<br>32<br>33<br>34                         | People with NAFLD                                                                | Patient education                                         | Standard care   | 1. Greater knowledge.                                             |
| 35<br>36<br>37<br>38<br>39<br>40<br>41<br>42<br>43 | Healthcare professionals dealing with people with polycystic liver disease       | Education of healthcare professionals about liver disease | Standard care   | 1. Early recognition.<br>2. Appropriate treatment.                |
| 44<br>45<br>46<br>47<br>48<br>49<br>50<br>51<br>52 | People with polycystic liver disease                                             | Early liver transplantation                               | Standard care   | 1. Quality of life.<br>2. Reducing symptoms.<br>3. Reducing pain. |
| 53<br>54<br>55<br>56<br>57<br>58<br>59<br>60       | People with autoimmune hepatitis                                                 | Interventions that affect T cells                         | No intervention | 1. Cure.<br>2. Improve quality of life                            |

|                                                                                              |                                         |                                                         |                |                                                                                                                  |
|----------------------------------------------------------------------------------------------|-----------------------------------------|---------------------------------------------------------|----------------|------------------------------------------------------------------------------------------------------------------|
| 1<br>2<br>3<br>4<br>5<br>6<br>7                                                              | People at risk of liver disease         | Screening                                               | Not applicable | Early diagnosis and treatment                                                                                    |
| 8<br>9<br>10<br>11                                                                           | People with polycystic liver disease    | Monitoring polycystic liver disease                     | Not applicable |                                                                                                                  |
| 12<br>13<br>14<br>15<br>16                                                                   | People with polycystic kidney disease   | Diagnosis polycystic liver disease                      | Not applicable |                                                                                                                  |
| 17<br>18<br>19<br>20<br>21<br>22                                                             | People with liver disease               | Methods to improve early appropriate treatment          | Not applicable | Early diagnosis and treatment                                                                                    |
| 23<br>24<br>25<br>26<br>27<br>28<br>29                                                       | People with polycystic kidney disease   | Methods to prevent symptomatic polycystic liver disease | Not applicable | 1. Quality of life.<br>2. Liver function.                                                                        |
| 30<br>31<br>32<br>33<br>34<br>35<br>36<br>37<br>38<br>39<br>40<br>41<br>42<br>43<br>44<br>45 | People undergoing liver transplantation | Various treatments                                      | Not applicable | 1. Survival<br>2. Complications<br>3. QoL<br>4. Hospital stay<br>5. Return to work<br>6. Improvement of symptoms |
| 46<br>47<br>48<br>49<br>50<br>51<br>52<br>53<br>54<br>55<br>56<br>57<br>58<br>59<br>60       | People with polycystic liver disease    | Diet (specifically soy proteins which contain oestrogen | Standard diet  | 1. Decrease size of cyst or preventing cysts to enlarge.<br>2. Decrease symptoms                                 |

|                                                                                                                                                          |                                                                                     |                                                                    |                     |                                                                                                     |
|----------------------------------------------------------------------------------------------------------------------------------------------------------|-------------------------------------------------------------------------------------|--------------------------------------------------------------------|---------------------|-----------------------------------------------------------------------------------------------------|
| 1<br>2<br>3<br>4<br>5<br>6<br>7<br>8<br>9<br>10<br>11                                                                                                    | People with NAFLD                                                                   | Various treatments                                                 | Not applicable      | 1. Impact on health<br>(no further details)<br>2. Progression to<br>liver failure                   |
| 12<br>13<br>14<br>15<br>16                                                                                                                               | People with suspected<br>NAFLD                                                      | Diagnosis                                                          | Not applicable      | 1. Early diagnosis                                                                                  |
| 17<br>18<br>19<br>20<br>21<br>22<br>23<br>24<br>25<br>26<br>27<br>28<br>29<br>30<br>31<br>32<br>33<br>34                                                 | People with gallstones                                                              | Various treatments                                                 | Not applicable      | 1. Impact on health<br>(no further details)                                                         |
| 35<br>36<br>37<br>38<br>39<br>40<br>41<br>42<br>43<br>44<br>45<br>46<br>47<br>48<br>49<br>50<br>51<br>52<br>53<br>54<br>55<br>56<br>57<br>58<br>59<br>60 | People with polycystic liver<br>disease                                             | Genetic treatments                                                 | Standard<br>therapy | 1. Reduce symptoms.<br>2. Decrease<br>occurrence and size<br>of cysts.<br>3. Increased<br>longevity |
|                                                                                                                                                          | Healthcare professionals<br>dealing with people with<br>primary biliary cholangitis | Education of<br>healthcare<br>professionals about<br>liver disease | Standard care       | 1. Early recognition.<br>2. Appropriate<br>treatment.                                               |
|                                                                                                                                                          | People undergoing<br>treatment for ulcerative<br>colitis                            | Various treatments                                                 | Not applicable      | 1. Adverse events<br>related to liver                                                               |
|                                                                                                                                                          | People with<br>cholangiocarcinoma                                                   | Liver transplantation                                              | Standard<br>therapy | 1. Survival<br>2. Complications<br>3. QoL                                                           |

|                                              |                                                                                    |                       |                                                                                    |
|----------------------------------------------|------------------------------------------------------------------------------------|-----------------------|------------------------------------------------------------------------------------|
|                                              |                                                                                    |                       | 4. Hospital stay<br>5. Return to work                                              |
| People undergoing liver transplantation      | Machine perfusion of donor organ                                                   | Cold storage          | 1. Survival<br>2. Complications<br>3. QoL<br>4. Hospital stay<br>5. Return to work |
| People with liver cancer                     | Novel treatments (irreversible electroporation, high intensity focused ultrasound) |                       | 1. Survival<br>2. Complications<br>3. QoL<br>4. Hospital stay<br>5. Return to work |
| People with hepatocellular carcinoma         | Liver resection                                                                    | Liver transplantation | 1. Survival<br>2. Complications<br>3. QoL<br>4. Hospital stay<br>5. Return to work |
| People with colorectal liver metastases      | Ablation                                                                           | Surgery               | 1. Survival<br>2. Complications<br>3. QoL<br>4. Hospital stay<br>5. Return to work |
| People with liver disease undergoing surgery | Ischaemic preconditioning                                                          | No IPC                | 1. Survival<br>2. Complications<br>3. QoL                                          |

|                                                     |                                       |                             |                                                                                                                                                  |
|-----------------------------------------------------|---------------------------------------|-----------------------------|--------------------------------------------------------------------------------------------------------------------------------------------------|
|                                                     |                                       |                             | 4. Hospital stay<br>5. Return to work                                                                                                            |
| People with liver disease<br>undergoing surgery     | Remote ischaemic<br>preconditioning   | No RIPC                     | 1. Survival<br>2. Complications<br>3. QoL<br>4. Hospital stay<br>5. Return to work                                                               |
| People with liver disease<br>undergoing surgery     | Goal-directed therapy                 | standard fluid<br>treatment | 1. Survival<br>2. Complications<br>3. QoL<br>4. Hospital stay<br>5. Return to work                                                               |
| People with compensated<br>liver cirrhosis          | Treatments (in<br>particular statins) | Other<br>interventions      | 1. Decompensation<br>2. Survival<br>3. Side effects<br>4. Quality of life.                                                                       |
| People with chronic liver<br>disease/ liver failure | Stem cell therapy                     | Standard<br>therapy         | 1. Graft and patient<br>survival<br>2. QoL.<br>3. Morbidity<br>compared to<br>conventional<br>transplantation<br>4. Patient reported<br>outcomes |

|                                                                                        |                                     |                |                           |
|----------------------------------------------------------------------------------------|-------------------------------------|----------------|---------------------------|
| People with Wilson's disease<br>(and other rare non-alcohol<br>liver related diseases) | Various treatments                  | Not applicable | Not stated                |
| People with suspected<br>autoimmune hepatitis                                          | Diagnosis of<br>autoimmune diseases | Not applicable | 1. Costs of<br>management |

## Appendix 2 List of unanswered research questions ('uncertainties') prioritised during the interim prioritisation

1. What are the best treatments that cure or delay the progression (worsening) of primary sclerosing cholangitis (PSC)?
2. Should all people above 40 years of age or those considered to be at risk of liver disease (because of family history of liver disease or because of their lifestyle) be tested for the presence of liver disease to identify liver diseases at an early stage?
3. Should people with primary sclerosing cholangitis (PSC) undergo screening (tested routinely) for cancer?
4. Are there any treatments that reverse the liver damage in primary sclerosing cholangitis (PSC)?
5. What are the best treatments that cure or delay the progression (worsening) of non-alcohol-related fatty liver disease (NAFLD)?
6. What are the best symptomatic treatments for itching in people with primary sclerosing cholangitis (PSC)?
7. Are there alternatives to invasive assessment of oesophageal varices in people with chronic liver disease?

- 1
- 2
- 3 8. Does vitamin D supplementation (adding Vitamin D in food or providing it in tablet form)
- 4
- 5 increase the lifespan, health-related quality of life, and decrease complications in people
- 6
- 7 with liver disease?
- 8
- 9
- 10 9. Should new methods to improve the understanding of evidence be developed for people
- 11
- 12 with liver and gallbladder diseases?
- 13
- 14 10. What is the best treatment for people with early or very early hepatocellular carcinoma
- 15
- 16 (HCC)?
- 17
- 18 11. Should the methods used to assess nutrition of patients in liver disease be standardised?
- 19
- 20 12. Does dieting improve liver function and decrease the requirement for liver transplantation in
- 21
- 22 obese people?
- 23
- 24 13. Should general public be educated about non-alcohol-related fatty liver disease (NAFLD)
- 25
- 26 with an aim to reduce the numbers of those that have it?
- 27
- 28 14. What are the best symptomatic treatments for itching in people with chronic liver diseases
- 29
- 30 other than primary sclerosing cholangitis (PSC) and primary biliary cholangitis (PBC)?
- 31
- 32 15. Do treatments targeted against deformation of bile duct (biliary stricture or narrowing of
- 33
- 34 bile duct due to the illness) work better than other treatments in people with primary
- 35
- 36 sclerosing cholangitis (PSC)?
- 37
- 38 16. What are the treatments available to decrease weight in overweight people with non-
- 39
- 40 alcohol-related fatty liver disease (NAFLD)?
- 41
- 42 17. What are the best treatments that cure or delay the progression (worsening) of non-alcohol
- 43
- 44 related steatohepatitis (NASH)?
- 45
- 46 18. Do statins (or other treatments) delay liver failure in people with advanced liver disease?
- 47
- 48 19. What are the best treatments that provide temporary symptom relief in people with
- 49
- 50 advanced liver disease?
- 51
- 52 20. Which is the most suitable antibiotic (or combination of antibiotics) in people with
- 53
- 54 cholangitis (biliary infection)?
- 55
- 56
- 57
- 58
- 59
- 60

- 1  
2  
3 21. What are the best treatments that cure or delay the progression (worsening) of autoimmune  
4 hepatitis (AIH)?  
5  
6
- 7  
8 22. Are there any methods other than liver biopsy (obtaining a piece of liver, usually using a  
9  
10 needle, for examination under microscope) for the early diagnosis of primary sclerosing  
11  
12 cholangitis (PSC) in people at risk of developing PSC?  
13
- 14 23. What are the best nutritional interventions in people undergoing liver transplantation?
- 15  
16 24. What are the best symptomatic treatments for fatigue (tiredness), joint pain, and other  
17  
18 symptoms in people with people with autoimmune hepatitis (AIH)?  
19
- 20  
21 25. Prior to liver transplantation, is it better to transport the donor liver using a machine which  
22  
23 pumps blood or preservation solution through the liver (machine perfusion) or is it better to  
24  
25 transport it in the standard way of transporting it immersed in cold preservation solution  
26  
27 (cold storage)?  
28
- 29  
30 26. What are the best treatments that cure or delay the progression (worsening) of chronic  
31  
32 hepatitis C virus (HCV) infection?  
33
- 34  
35 27. Does education of people with liver disease about the natural course and treatment of liver  
36  
37 disease improve the patient knowledge, patient responsibility, and decrease hospital visits?  
38
- 39  
40 28. What are the best treatments that cure or delay the progression (worsening) of primary  
41  
42 biliary cholangitis (PBC)?  
43
- 44  
45 29. Is nurse-led care as effective or better than doctor-led care for non-alcohol related fatty liver  
46  
47 disease (NAFLD)?  
48
- 49  
50 30. Is treatment targeted against deformation of bile duct (biliary stricture or narrowing of bile  
51  
52 duct due to cancer) better than standard treatment for people with bile duct cancer?  
53
- 54  
55 31. Is surgery (in the form of removal of gallbladder) required in people with gallstones?  
56
- 57  
58 32. Should people with non-alcohol-related fatty liver disease (NAFLD) and non-alcohol-related  
59  
60 steatohepatitis (NASH) receive additional education about the condition?
33. What is the best immunosuppressive regimen in adults undergoing liver transplantation?



- 1
  - 2
  - 3
  - 4
  - 5
  - 6
  - 7
  - 8
  - 9
  - 10
  - 11
  - 12
  - 13
  - 14
  - 15
  - 16
  - 17
  - 18
  - 19
  - 20
  - 21
  - 22
  - 23
  - 24
  - 25
  - 26
  - 27
  - 28
  - 29
  - 30
  - 31
  - 32
  - 33
  - 34
  - 35
  - 36
  - 37
  - 38
  - 39
  - 40
  - 41
  - 42
  - 43
  - 44
  - 45
  - 46
  - 47
  - 48
  - 49
  - 50
  - 51
  - 52
  - 53
  - 54
  - 55
  - 56
  - 57
  - 58
  - 59
  - 60
34. Is endoscopic ultrasound (EUS) (using a ultrasound attached to the end of an endoscope) or magnetic resonance cholangiopancreatography (MRCP, a form of MRI scan) better in the diagnosis of common bile duct (CBD) stones?
35. How can we improve compliance to treatment (adherence to treatment or the degree to which a patient correctly follows medical advice) in people with liver disease?
36. What are the best symptomatic treatments for relief of ulcerative colitis (UC) in people with primary sclerosing cholangitis (PSC) who have undergone liver transplantation?
37. What are the best symptomatic treatments for itching and fatigue (tiredness) in people with primary biliary cholangitis (PBC)?
38. Does education of people with asymptomatic (absence of symptoms) liver disease result in change of life style and cure/delay the progression (worsening) of liver disease?
39. What are the best treatments that are available for the treatment of pregnant women with cholestasis (condition where bile flow from the liver is obstructed)?
40. Is transarterial chemoembolisation (TACE) or transarterial embolisation (TAE) (blocking the blood supply to cancer with or without chemotherapy drugs) effective in the treatment of people with liver metastases?
41. Should people with liver metastases (cancer spread to the liver) from neuroendocrine cancer (a form of cancer that arises from cells that secrete hormones and nervous system) undergo liver resection?
42. What are the best methods available to decrease blood loss during liver resection?
43. What are the best treatments that cure or delay the progression (worsening) of chronic hepatitis B virus (HBV) infection?
44. What are the best treatments for people with polycystic liver disease?
45. Should the healthcare professionals dealing with childhood liver diseases be provided additional education about childhood liver diseases compared to standard education where childhood diseases are learnt as part of overall education?

- 1  
2  
3 46. What is the best immunosuppressive regimen in children undergoing liver transplantation?  
4  
5  
6 47. Should blood vessels supplying the liver be temporarily blocked in people undergoing liver  
7  
8 resection? If so, what is the best way of performing this?  
9  
10 48. What is the best treatment that should be given to people who undergo liver transplantation  
11  
12 for chronic hepatitis B virus (HBV) infection to prevent reinfection with chronic hepatitis B  
13  
14 virus (HBV) infection?  
15  
16  
17  
18  
19  
20  
21  
22  
23  
24  
25  
26  
27  
28  
29  
30  
31  
32  
33  
34  
35  
36  
37  
38  
39  
40  
41  
42  
43  
44  
45  
46  
47  
48  
49  
50  
51  
52  
53  
54  
55  
56  
57  
58  
59  
60

For peer review only

Appendix 3 Next step to address the top 10 uncertainty based on current best evidence (detailed)

| Treatment uncertainty<br>(Research question)                                                   | High-quality<br>systematic review <sup>a</sup> | Research<br>recommendations of<br>systematic review                                                                                                                                                             | RCTs not included in<br>the systematic<br>review <sup>a,b,c</sup>                                                    | Patient-oriented<br>outcomes assessed in<br>trials not included in<br>the systematic review <sup>d</sup> | Next step                                                                                                                                 |
|------------------------------------------------------------------------------------------------|------------------------------------------------|-----------------------------------------------------------------------------------------------------------------------------------------------------------------------------------------------------------------|----------------------------------------------------------------------------------------------------------------------|----------------------------------------------------------------------------------------------------------|-------------------------------------------------------------------------------------------------------------------------------------------|
| What is the best treatment for people with early or very early hepatocellular carcinoma (HCC)? | [1]                                            | High-quality RCTs designed to assess clinically important differences in all-cause mortality and health-related quality of life, and having an adequate follow-up period (approximately five years) are needed. | NCT02169765<br>NCT02704130<br>NCT02728193<br>NCT02243384<br>NCT00844454<br>NCT01918683<br>NCT01570075<br>NCT01351194 | Survival (7 trials),<br>recurrence (5 trials),<br>morbidity (3 trials)                                   | High-quality RCTs of interventions not covered in ongoing trials and comparison of health-related quality (HRQoL) in different treatments |

|                                                                                                                                                                                                                                                                                                                                  |                                                          |                                                                                                                                                                                                                                                                     |                                                                                                                                                    |                                                                           |                                                                                                |
|----------------------------------------------------------------------------------------------------------------------------------------------------------------------------------------------------------------------------------------------------------------------------------------------------------------------------------|----------------------------------------------------------|---------------------------------------------------------------------------------------------------------------------------------------------------------------------------------------------------------------------------------------------------------------------|----------------------------------------------------------------------------------------------------------------------------------------------------|---------------------------------------------------------------------------|------------------------------------------------------------------------------------------------|
| <p>1<br/>2<br/>3<br/>4<br/>5<br/>6<br/>7<br/>8<br/>9<br/>10<br/>11<br/>12<br/>13<br/>14<br/>15<br/>16<br/>17<br/>18<br/>19<br/>20<br/>21<br/>22<br/>23<br/>24<br/>25<br/>26<br/>27<br/>28<br/>29</p> <p>What are the best treatments that cure or delay the progression (worsening) of primary sclerosing cholangitis (PSC)?</p> | <p>[2]</p>                                               | <p>An urgent need exists to identify an effective medical treatment for primary sclerosing cholangitis through well-designed RCTs with adequate follow-up that aim to identify differences in outcomes important to people with primary sclerosing cholangitis.</p> | <p>NCT03394781<br/>NCT02605213<br/>NCT02943460<br/>NCT02704364<br/>NCT01688024<br/>NCT02177136<br/>NCT01672853<br/>NCT03035058<br/>NCT03333928</p> | <p>None of the trials include survival, HRQoL as outcomes<sup>e</sup></p> | <p>High-quality RCTs with clinical outcomes</p>                                                |
| <p>30<br/>31<br/>32<br/>33<br/>34<br/>35<br/>36<br/>37<br/>38<br/>39<br/>40<br/>41<br/>42<br/>43<br/>44<br/>45<br/>46</p> <p>What are the best treatments that cure or delay the progression (worsening) of non-</p>                                                                                                             | <p>[3] (includes only pharmacological interventions)</p> | <p>Further well-designed randomised clinical trials with sufficiently</p>                                                                                                                                                                                           | <p>More than 10 published trials on lifestyle interventions and more than 20 trials</p>                                                            | <p>Lifestyle interventions and nutritional supplementation</p>            | <p>High-quality systematic reviews on lifestyle interventions (one review) and nutritional</p> |

1  
2  
3  
4  
5  
6  
7  
8  
9  
10  
11  
12  
13  
14  
15  
16  
17  
18  
19  
20  
21  
22  
23  
24  
25  
26  
27  
28  
29  
30  
31  
32  
33  
34  
35  
36  
37  
38  
39  
40  
41  
42  
43  
44  
45  
46

|                                                     |  |                                          |                                                                                                                                                                                                                                                                                               |                                                                                                                                                                                                                                                                                                       |                                                                                                                                                |
|-----------------------------------------------------|--|------------------------------------------|-----------------------------------------------------------------------------------------------------------------------------------------------------------------------------------------------------------------------------------------------------------------------------------------------|-------------------------------------------------------------------------------------------------------------------------------------------------------------------------------------------------------------------------------------------------------------------------------------------------------|------------------------------------------------------------------------------------------------------------------------------------------------|
| <p>alcohol-related fatty liver disease (NAFLD)?</p> |  | <p>large sample sizes are necessary.</p> | <p>on nutritional supplementation with no recent high-quality systematic reviews<br/><u>Pharmacological interventions</u><br/>NCT02605616<br/>NCT01002547<br/>NCT02927314<br/>NCT03291249<br/>NCT03166735<br/>NCT03486899<br/>NCT03061721<br/>NCT02784444<br/>NCT02077374<br/>NCT03486912</p> | <p>Not applicable as there are no high quality systematic reviews<br/><u>Pharmacological interventions</u><br/>Health-related quality of life (2 trials), resolution of fatty liver disease (11 trials), mortality (2 trials), cirrhosis (2 trials), cardiovascular events (2 trials)<sup>e</sup></p> | <p>supplementation to cure or delay the progression of NAFLD and high-quality RCTs on pharmacological interventions with clinical outcomes</p> |
|-----------------------------------------------------|--|------------------------------------------|-----------------------------------------------------------------------------------------------------------------------------------------------------------------------------------------------------------------------------------------------------------------------------------------------|-------------------------------------------------------------------------------------------------------------------------------------------------------------------------------------------------------------------------------------------------------------------------------------------------------|------------------------------------------------------------------------------------------------------------------------------------------------|

1  
2  
3  
4  
5  
6  
7  
8  
9  
10  
11  
12  
13  
14  
15  
16  
17  
18  
19  
20  
21  
22  
23  
24  
25  
26  
27  
28  
29  
30  
31  
32  
33  
34  
35  
36  
37  
38  
39  
40  
41  
42  
43  
44  
45  
46

|  |  |  |             |  |  |
|--|--|--|-------------|--|--|
|  |  |  | NCT02854605 |  |  |
|  |  |  | NCT01963845 |  |  |
|  |  |  | NCT03437720 |  |  |
|  |  |  | NCT02684591 |  |  |
|  |  |  | NCT02787304 |  |  |
|  |  |  | NCT02466516 |  |  |
|  |  |  | NCT02633956 |  |  |
|  |  |  | NCT03008070 |  |  |
|  |  |  | NCT03205150 |  |  |
|  |  |  | NCT02923154 |  |  |
|  |  |  | NCT02913105 |  |  |
|  |  |  | NCT01899859 |  |  |
|  |  |  | NCT02548351 |  |  |
|  |  |  | NCT03053063 |  |  |
|  |  |  | NCT03053050 |  |  |
|  |  |  | NCT02413372 |  |  |

1  
2  
3  
4  
5  
6  
7  
8  
9  
10  
11  
12  
13  
14  
15  
16  
17  
18  
19  
20  
21  
22  
23  
24  
25  
26  
27  
28  
29  
30  
31  
32  
33  
34  
35  
36  
37  
38  
39  
40  
41  
42  
43  
44  
45  
46

|  |  |  |             |  |  |
|--|--|--|-------------|--|--|
|  |  |  | NCT02443116 |  |  |
|  |  |  | NCT01464801 |  |  |
|  |  |  | NCT03449446 |  |  |
|  |  |  | NCT02912260 |  |  |
|  |  |  | NCT02856555 |  |  |
|  |  |  | NCT02704403 |  |  |
|  |  |  | NCT01617772 |  |  |
|  |  |  | NCT02217475 |  |  |
|  |  |  | NCT01406704 |  |  |
|  |  |  | NCT03248882 |  |  |
|  |  |  | NCT01051219 |  |  |
|  |  |  | NCT02316717 |  |  |
|  |  |  | NCT02970942 |  |  |
|  |  |  | NCT03439254 |  |  |
|  |  |  | NCT02574325 |  |  |
|  |  |  | NCT01703260 |  |  |

|                                                                                                                                                                                                                                                                                                                                                                                                                           |                                                        |                                                                                                                                                                                                                                                                                                      |                                                                                                                                                                                                        |                                                                                                                                                                                                                                                                                 |                                                                                                                                                                      |
|---------------------------------------------------------------------------------------------------------------------------------------------------------------------------------------------------------------------------------------------------------------------------------------------------------------------------------------------------------------------------------------------------------------------------|--------------------------------------------------------|------------------------------------------------------------------------------------------------------------------------------------------------------------------------------------------------------------------------------------------------------------------------------------------------------|--------------------------------------------------------------------------------------------------------------------------------------------------------------------------------------------------------|---------------------------------------------------------------------------------------------------------------------------------------------------------------------------------------------------------------------------------------------------------------------------------|----------------------------------------------------------------------------------------------------------------------------------------------------------------------|
|                                                                                                                                                                                                                                                                                                                                                                                                                           |                                                        |                                                                                                                                                                                                                                                                                                      | NCT01260246                                                                                                                                                                                            |                                                                                                                                                                                                                                                                                 |                                                                                                                                                                      |
|                                                                                                                                                                                                                                                                                                                                                                                                                           |                                                        |                                                                                                                                                                                                                                                                                                      | NCT02960204                                                                                                                                                                                            |                                                                                                                                                                                                                                                                                 |                                                                                                                                                                      |
| <p>1<br/>2<br/>3<br/>4<br/>5<br/>6<br/>7<br/>8<br/>9<br/>10<br/>11<br/>12<br/>13<br/>14<br/>15<br/>16<br/>17<br/>18<br/>19<br/>20<br/>21<br/>22<br/>23<br/>24<br/>25<br/>26<br/>27<br/>28<br/>29<br/>30<br/>31<br/>32<br/>33<br/>34<br/>35<br/>36<br/>37<br/>38<br/>39<br/>40<br/>41<br/>42<br/>43<br/>44<br/>45<br/>46</p> <p>What is the best immunosuppressive regimen in adults undergoing liver transplantation?</p> | <p>[4] (covers only maintenance immunosuppression)</p> | <p>Future randomised clinical trials should be adequately powered; performed in people who are generally seen in the clinic rather than in highly selected participants; employ blinding; avoid postrandomisation dropouts or planned cross-overs; and use clinically important outcomes such as</p> | <p><u>Induction immunosuppression</u></p> <p>More than 20 published trials</p> <p><u>Maintenance immunosuppression</u></p> <p>NCT01998789</p> <p>NCT01230502</p> <p>NCT02909335</p> <p>NCT00286871</p> | <p><u>Induction immunosuppression</u></p> <p>Not applicable as there is no high quality systematic review</p> <p><u>Maintenance immunosuppression</u></p> <p>Graft survival (1 trial)</p> <p>Adverse events (1 trial)</p> <p>Hepatocellular carcinoma (1 trial)<sup>e</sup></p> | <p>High-quality systematic review on induction immunosuppressive regimen and high-quality RCTs on maintenance immunosuppression with important clinical outcomes</p> |



1  
2  
3  
4  
5  
6  
7  
8  
9  
10  
11  
12  
13  
14  
15  
16  
17  
18  
19  
20  
21  
22  
23  
24  
25  
26  
27  
28  
29  
30  
31  
32  
33  
34  
35  
36  
37  
38  
39  
40  
41  
42  
43  
44  
45  
46

|                                                             |      |                                                                                                                                                                                                                                                                                                     |      |   |                                                 |
|-------------------------------------------------------------|------|-----------------------------------------------------------------------------------------------------------------------------------------------------------------------------------------------------------------------------------------------------------------------------------------------------|------|---|-------------------------------------------------|
|                                                             |      | <p>mortality, graft loss, renal impairment, chronic kidney disease, and retransplantation.</p> <p>Such trials should use tacrolimus as one of the control groups.</p> <p>Moreover, such trials ought to be designed in such a way as to ensure low risk of bias and low risks of random errors.</p> |      |   |                                                 |
| Should general public be educated about non-alcohol-related | None | -                                                                                                                                                                                                                                                                                                   | None | - | High-quality RCTs on education to prevent NAFLD |

|                                                                                                                   |             |          |                                                                                                                                                                                              |                                                                                 |                                                 |
|-------------------------------------------------------------------------------------------------------------------|-------------|----------|----------------------------------------------------------------------------------------------------------------------------------------------------------------------------------------------|---------------------------------------------------------------------------------|-------------------------------------------------|
| <p>fatty liver disease (NAFLD) with an aim to reduce the numbers of those that have it?</p>                       |             |          |                                                                                                                                                                                              |                                                                                 |                                                 |
| <p>What are the best treatments that cure or delay the progression (worsening) of autoimmune hepatitis (AIH)?</p> | <p>None</p> | <p>-</p> | <p>[5-7]<br/>NCT02050646<br/>NCT02463331<br/>NCT00608894<br/>NCT02900443<br/>NCT02239562<br/>NCT01170351<br/>NCT03217422<br/>NCT01661842<br/>NCT00687180<br/>NCT01980745<br/>NCT02878863</p> | <p>Survival (1 trial), health-related quality of life (1 trial)<sup>e</sup></p> | <p>High quality RCTs with clinical outcomes</p> |

1  
2  
3  
4  
5  
6  
7  
8  
9  
10  
11  
12  
13  
14  
15  
16  
17  
18  
19  
20  
21  
22  
23  
24  
25  
26  
27  
28  
29  
30  
31  
32  
33  
34  
35  
36  
37  
38  
39  
40  
41  
42  
43  
44  
45  
46

1  
2  
3  
4  
5  
6  
7  
8  
9  
10  
11  
12  
13  
14  
15  
16  
17  
18  
19  
20  
21  
22  
23  
24  
25  
26  
27  
28  
29  
30  
31  
32  
33  
34  
35  
36  
37  
38  
39  
40  
41  
42  
43  
44  
45  
46

|                                                                                                                                                                 |                                                                                                                                                      |   |                                                                         |                                                                                                   |                                                                                                                       |
|-----------------------------------------------------------------------------------------------------------------------------------------------------------------|------------------------------------------------------------------------------------------------------------------------------------------------------|---|-------------------------------------------------------------------------|---------------------------------------------------------------------------------------------------|-----------------------------------------------------------------------------------------------------------------------|
|                                                                                                                                                                 |                                                                                                                                                      |   | NCT02936596                                                             |                                                                                                   |                                                                                                                       |
| What are the best treatments that cure or delay the progression (worsening) of non-alcohol related steatohepatitis (NASH)?                                      | The evidence related to this question is covered under non-alcohol related fatty liver disease by performing a subgroup analysis of people with NASH |   |                                                                         |                                                                                                   |                                                                                                                       |
| Prior to liver transplantation, is it better to transport the donor liver using a machine which pumps blood or preservation solution through the liver (machine | None                                                                                                                                                 | - | NCT02775162<br>NCT03124641<br>NCT02940600<br>NCT02584283<br>NCT01317342 | Overall survival (4 trials), graft survival (5 trials), health-related quality of life (2 trials) | Await results of the RCTs (all expected to complete by the end of 2019) and perform a high quality systematic review. |

|                                                                                                                                                 |            |                                                                                                                                                                                            |                                                                                                                                                    |                                                                                             |                                                 |
|-------------------------------------------------------------------------------------------------------------------------------------------------|------------|--------------------------------------------------------------------------------------------------------------------------------------------------------------------------------------------|----------------------------------------------------------------------------------------------------------------------------------------------------|---------------------------------------------------------------------------------------------|-------------------------------------------------|
| <p>perfusion) or is it better to transport it in the standard way of transporting it immersed in cold preservation solution (cold storage)?</p> |            |                                                                                                                                                                                            |                                                                                                                                                    |                                                                                             |                                                 |
| <p>What are the best treatments that cure or delay the progression (worsening) of primary biliary cholangitis (PBC)?</p>                        | <p>[8]</p> | <p>Further well-designed randomised clinical trials are necessary. Future randomised clinical trials ought to be adequately powered; performed in people who are generally seen in the</p> | <p>NCT02937012<br/>NCT01473524<br/>NCT02823353<br/>NCT02135536<br/>NCT01614405<br/>NCT02609048<br/>NCT00746486<br/>NCT02955602<br/>NCT03226067</p> | <p>Health-related quality of life (5 trials), relief of symptoms (5 trials)<sup>e</sup></p> | <p>High-quality RCTs with clinical outcomes</p> |

1  
2  
3  
4  
5  
6  
7  
8  
9  
10  
11  
12  
13  
14  
15  
16  
17  
18  
19  
20  
21  
22  
23  
24  
25  
26  
27  
28  
29  
30  
31  
32  
33  
34  
35  
36  
37  
38  
39  
40  
41  
42  
43  
44  
45  
46

|  |  |                          |             |  |  |
|--|--|--------------------------|-------------|--|--|
|  |  | clinic rather than in    | NCT03112681 |  |  |
|  |  | highly selected          | NCT01904058 |  |  |
|  |  | participants; employ     | NCT02943447 |  |  |
|  |  | blinding; avoid post-    | NCT03124108 |  |  |
|  |  | randomisation            | NCT03345589 |  |  |
|  |  | dropouts or planned      | NCT03092765 |  |  |
|  |  | cross-overs; should      | NCT03394924 |  |  |
|  |  | have sufficient follow-  | NCT02516605 |  |  |
|  |  | up period (e.g. five or  | NCT03253276 |  |  |
|  |  | 10 years or more); and   | NCT02965911 |  |  |
|  |  | use clinically important | NCT01899703 |  |  |
|  |  | outcomes such as         | NCT01654731 |  |  |
|  |  | mortality, health-       | NCT02308111 |  |  |
|  |  | related quality of life, | NCT00125281 |  |  |
|  |  | cirrhosis,               | NCT02701166 |  |  |
|  |  | decompensated            |             |  |  |

|                                                                                                        |                                                                                                                                                                                                                                                                                                                                                                       |                                                                                                                                                                 |  |  |  |
|--------------------------------------------------------------------------------------------------------|-----------------------------------------------------------------------------------------------------------------------------------------------------------------------------------------------------------------------------------------------------------------------------------------------------------------------------------------------------------------------|-----------------------------------------------------------------------------------------------------------------------------------------------------------------|--|--|--|
|                                                                                                        |                                                                                                                                                                                                                                                                                                                                                                       | <p>cirrhosis, and liver transplantation.</p> <p>Alternatively, very large groups of participants should be randomised to facilitate shorter trial duration.</p> |  |  |  |
| <p>Are there any treatments that reverse the liver damage in primary sclerosing cholangitis (PSC)?</p> | <p>The evidence related to this question is covered under treatments for primary sclerosing cholangitis. The systematic review did not include fibrosis as one of the outcomes. Nine of the trials included in the systematic review reported on fibrosis. Two of the trials not included in the systematic review (and listed above) reported on liver fibrosis.</p> |                                                                                                                                                                 |  |  |  |

a Numbers indicate the reference number.

1  
2  
3  
4  
5  
6  
7  
8  
9  
10  
11  
12  
13  
14  
15  
16  
17  
18  
19  
20  
21  
22  
23  
24  
25  
26  
27  
28  
29  
30  
31  
32  
33  
34  
35  
36  
37  
38  
39  
40  
41  
42  
43  
44  
45  
46

1  
2  
3  
4  
5  
6  
7  
8  
9  
10  
11  
12  
13  
14  
15  
16  
17  
18  
19  
20  
21  
22  
23  
24  
25  
26  
27  
28  
29  
30  
31  
32  
33  
34  
35  
36  
37  
38  
39  
40  
41  
42  
43  
44  
45  
46

b Ongoing trials, unpublished trials, or trials published since the search date for the systematic review when a high-quality systematic review based on randomised controlled trials exists. If no systematic reviews based on randomised controlled trials exist, these are either published trials or ongoing studies.

c NCT followed by a number indicates trial registration number

d This information is reported to find out whether the important patient-oriented outcomes are reported in the trials not covered by high-quality systematic reviews. This is to help with deciding whether new randomised controlled trials are necessary on the topic.

e The remaining trials reported treatment-related adverse events, composite outcomes and surrogate markers.

Appendix 4 Scores obtained by each question in the different Delphi rounds

| Questions <sup>a</sup> | Delphi 1:<br>Proportion<br>who rated this<br>question as<br>highly<br>important | Delp<br>hi 1:<br>Medi<br>an<br>(IQR) | Delphi 2:<br>Proportion<br>who rated this<br>question as<br>highly<br>important | Delp<br>hi 2:<br>Medi<br>an<br>(IQR) | Delphi 3:<br>Proportion<br>who rated this<br>question as<br>highly<br>important | Delp<br>hi 3:<br>Medi<br>an<br>(IQR) | Consen<br>sus<br>reache<br>d in<br>Delphi<br>3? <sup>b</sup> |
|------------------------|---------------------------------------------------------------------------------|--------------------------------------|---------------------------------------------------------------------------------|--------------------------------------|---------------------------------------------------------------------------------|--------------------------------------|--------------------------------------------------------------|
|------------------------|---------------------------------------------------------------------------------|--------------------------------------|---------------------------------------------------------------------------------|--------------------------------------|---------------------------------------------------------------------------------|--------------------------------------|--------------------------------------------------------------|

|                                                                                                                                                                                                                                                                       |       |              |       |             |       |          |     |
|-----------------------------------------------------------------------------------------------------------------------------------------------------------------------------------------------------------------------------------------------------------------------|-------|--------------|-------|-------------|-------|----------|-----|
| 1.<br>What are the best treatments that cure or delay the progression (worsening) of primary sclerosing cholangitis (PSC)?                                                                                                                                            | 78.8% | 8(7,9)       | 83.9% | 8(7,9)      | 93.3% | 8(7,9)   | Yes |
| 2.<br>Should all people above 40 years of age or those considered to be at risk of liver disease (because of family history of liver disease or because of their lifestyle) be tested for the presence of liver disease to identify liver diseases at an early stage? | 44.4% | 6(5,7)       | 35.3% | 6(5,7)      | 33.3% | 6(5,7)   | No  |
| 3.<br>Should people with primary sclerosing cholangitis (PSC) undergo screening (tested routinely) for cancer?                                                                                                                                                        | 46.9% | 6(5,9)       | 50.0% | 6.5(5.75,8) | 44.8% | 6(6,7.5) | No  |
| 4.<br>Are there any treatments that reverse the liver damage in primary sclerosing cholangitis (PSC)?                                                                                                                                                                 | 59.4% | 7.5(5.8,7.5) | 70.0% | 7.5(6.9)    | 72.4% | 7(6,9)   | Yes |
| 5.<br>What are the best treatments that cure or delay the progression (worsening) of non-alcohol-related fatty liver disease (NAFLD)?                                                                                                                                 | 76.5% | 8(6.7,5,9)   | 87.5% | 8.5(7.9)    | 90.3% | 9(8,9)   | Yes |
| 6.<br>What are the best symptomatic treatments for itching in people with primary sclerosing cholangitis (PSC)?                                                                                                                                                       | 48.5% | 6(5,7.5)     | 48.4% | 6(5,7)      | 50.0% | 6.5(5.7) | No  |



|                                                                                                                                                                                                            |       |            |       |           |       |               |     |
|------------------------------------------------------------------------------------------------------------------------------------------------------------------------------------------------------------|-------|------------|-------|-----------|-------|---------------|-----|
| 7.Are there alternatives to invasive assessment of oesophageal varices in people with chronic liver disease?                                                                                               | 48.6% | 6(5,8)     | 54.5% | 7(5.5,8)  | 56.3% | 7(6,8)        | No  |
| 8.Does vitamin D supplementation (adding Vitamin D in food or providing it in tablet form) increase the lifespan, health-related quality of life, and decrease complications in people with liver disease? | 37.1% | 6(4,7)     | 39.4% | 6(4,7)    | 37.5% | 6(4.2,5,7,75) | No  |
| 9.Should new methods to improve the understanding of evidence be developed for people with liver and gallbladder diseases?                                                                                 | 38.2% | 6(4,8)     | 46.9% | 6(4,8)    | 48.4% | 6(5,8)        | No  |
| 10.What is the best treatment for people with early or very early hepatocellular carcinoma (HCC)?                                                                                                          | 76.5% | 8(6.7,5,9) | 87.5% | 8(7,9)    | 93.5% | 8(7,9)        | Yes |
| 11.Should the methods used to assess nutrition of patients in liver disease be standardised?                                                                                                               | 57.1% | 7(5,9)     | 54.5% | 7(5,8)    | 59.4% | 7(5,8)        | No  |
| 12.Does dieting improve liver function and decrease the requirement for liver transplantation in obese people?                                                                                             | 48.6% | 6(4,8)     | 44.1% | 6(4,7.25) | 48.5% | 6(5,7)        | No  |

|                                                                                                                                                                                                                    |       |           |       |        |       |            |     |
|--------------------------------------------------------------------------------------------------------------------------------------------------------------------------------------------------------------------|-------|-----------|-------|--------|-------|------------|-----|
| 13.Should general public be educated about non-alcohol-related fatty liver disease (NAFLD) with an aim to reduce the numbers of those that have it?                                                                | 72.2% | 7.5(6,9)  | 73.5% | 8(6,9) | 81.8% | 8(7,9)     | Yes |
| 14.What are the best symptomatic treatments for itching in people with chronic liver diseases other than primary sclerosing cholangitis (PSC) and primary biliary cholangitis (PBC)?                               | 48.5% | 6(4.5,7)  | 48.4% | 6(5,7) | 50.0% | 6.5(5,7)   | No  |
| 15.Do treatments targeted against deformation of bile duct (biliary stricture or narrowing of bile duct due to the illness) work better than other treatments in people with primary sclerosing cholangitis (PSC)? | 19.4% | 5(4,6)    | 20.0% | 5(4,6) | 20.7% | 5(4,6)     | No  |
| 16.What are the treatments available to decrease weight in overweight people with non-alcohol-related fatty liver disease (NAFLD)?                                                                                 | 37.1% | 5(4,8)    | 27.3% | 6(4,7) | 28.1% | 5(4,7)     | No  |
| 17.What are the best treatments that cure or delay the progression (worsening) of non-alcohol related steatohepatitis (NASH)?                                                                                      | 67.6% | 8(5,8.25) | 71.0% | 8(6,9) | 76.7% | 8(6.7,5,9) | Yes |

|                                                                                                                                                                                                                                              |       |             |       |              |       |        |     |
|----------------------------------------------------------------------------------------------------------------------------------------------------------------------------------------------------------------------------------------------|-------|-------------|-------|--------------|-------|--------|-----|
| 18.Do statins (or other treatments) delay liver failure in people with advanced liver disease?                                                                                                                                               | 45.7% | 6(5,7)      | 39.4% | 6(6,7)       | 43.8% | 6(6,7) | No  |
| 19.What are the best treatments that provide temporary symptom relief in people with advanced liver disease?                                                                                                                                 | 50.0% | 6.5(5,7.75) | 52.9% | 7(5.7,5,7.2) | 54.5% | 7(6,7) | No  |
| 20.Which is the most suitable antibiotic (or combination of antibiotics) in people with cholangitis (biliary infection)?                                                                                                                     | 64.7% | 7(5,8)      | 68.8% | 7(5.2,5,8)   | 67.7% | 7(5,8) | No  |
| 21.What are the best treatments that cure or delay the progression (worsening) of autoimmune hepatitis (AIH)?                                                                                                                                | 75.8% | 7(6.5,9)    | 81.3% | 7.5(7,9)     | 80.6% | 8(7,9) | Yes |
| 22.Are there any methods other than liver biopsy (obtaining a piece of liver, usually using a needle, for examination under microscope) for the early diagnosis of primary sclerosing cholangitis (PSC) in people at risk of developing PSC? | 53.1% | 7(5,8)      | 60.0% | 7(5,8)       | 58.6% | 7(5,8) | No  |
| 23.What are the best nutritional interventions in people undergoing liver transplantation?                                                                                                                                                   | 52.8% | 7(5,8)      | 51.5% | 7(5,8)       | 53.1% | 7(5,8) | No  |

|                                                                                                                                                                                                                                                                                                              |       |               |       |               |       |        |     |
|--------------------------------------------------------------------------------------------------------------------------------------------------------------------------------------------------------------------------------------------------------------------------------------------------------------|-------|---------------|-------|---------------|-------|--------|-----|
| 24. What are the best symptomatic treatments for fatigue (tiredness), joint pain, and other symptoms in people with autoimmune hepatitis (AIH)?                                                                                                                                                              | 61.8% | 7(6,8)        | 65.6% | 7(6,8)        | 64.5% | 7(6,8) | No  |
| 25. Prior to liver transplantation, is it better to transport the donor liver using a machine which pumps blood or preservation solution through the liver (machine perfusion) or is it better to transport it in the standard way of transporting it immersed in cold preservation solution (cold storage)? | 54.5% | 7(5,9)        | 68.8% | 7(6,8<br>.75) | 74.2% | 7(6,9) | Yes |
| 26. What are the best treatments that cure or delay the progression (worsening) of chronic hepatitis C virus (HCV) infection?                                                                                                                                                                                | 42.4% | 6(2,8)        | 40.0% | 5.5(2<br>,7)  | 37.9% | 5(2,7) | No  |
| 27. Does education of people with liver disease about the natural course and treatment of liver disease improve the patient knowledge, patient responsibility, and decrease hospital visits?                                                                                                                 | 51.4% | 7(4,8)        | 58.8% | 7(4,7<br>.25) | 57.6% | 7(4,8) | No  |
| 28. What are the best treatments that cure or delay the progression (worsening) of primary biliary cholangitis (PBC)?                                                                                                                                                                                        | 61.8% | 7(5,7<br>5,8) | 68.8% | 7(6,8)        | 74.2% | 7(6,8) | Yes |

|                                                                                                                                                                                                                                  |       |        |       |        |       |        |     |
|----------------------------------------------------------------------------------------------------------------------------------------------------------------------------------------------------------------------------------|-------|--------|-------|--------|-------|--------|-----|
| 29. Is nurse-led care as effective or better than doctor-led care for non-alcohol related fatty liver disease (NAFLD)?                                                                                                           | 38.2% | 5(4,8) | 31.3% | 5(4,7) | 25.8% | 5(4,7) | No  |
| 30. Is treatment targeted against deformation of bile duct (biliary stricture or narrowing of bile duct due to cancer) better than standard treatment for people with bile duct cancer?                                          | 35.5% | 5(4,7) | 22.6% | 5(4,6) | 20.0% | 5(4,6) | No  |
| 31. Is surgery (in the form of removal of gallbladder) required in people with gallstones?                                                                                                                                       | 24.2% | 5(4,6) | 30.0% | 5(4,7) | 24.1% | 5(4,5) | No  |
| 32. Should people with non-alcohol-related fatty liver disease (NAFLD) and non-alcohol-related steatohepatitis (NASH) receive additional education about the condition?                                                          | 52.9% | 7(4,8) | 56.3% | 7(4,2) | 54.8% | 7(5,8) | No  |
| 33. What is the best immunosuppressive regimen in adults undergoing liver transplantation?                                                                                                                                       | 73.5% | 7(6,9) | 84.4% | 8(7,9) | 90.3% | 8(7,9) | Yes |
| 34. Is endoscopic ultrasound (EUS) (using a ultrasound attached to the end of an endoscope) or magnetic resonance cholangio pancreatography (MRCP, a form of MRI scan) better in the diagnosis of common bile duct (CBD) stones? | 36.7% | 5(4,7) | 30.0% | 5(4,7) | 20.7% | 5(4,6) | No  |

|                                                                                                                                                                                 |       |              |       |              |       |               |     |
|---------------------------------------------------------------------------------------------------------------------------------------------------------------------------------|-------|--------------|-------|--------------|-------|---------------|-----|
| 35.How can we improve compliance to treatment (adherence to treatment or the degree to which a patient correctly follows medical advice) in people with liver disease?          | 67.6% | 7(5,8<br>)   | 69.7% | 7(5,8<br>)   | 71.9% | 7(5,8<br>)    | Yes |
| 36.What are the best symptomatic treatments for relief of ulcerative colitis (UC) in people with primary sclerosing cholangitis (PSC) who have undergone liver transplantation? | 51.6% | 7(5,8<br>)   | 56.7% | 7(5,8<br>)   | 55.2% | 7(6,8<br>)    | No  |
| 37.What are the best symptomatic treatments for itching and fatigue (tiredness) in people with primary biliary cholangitis (PBC)?                                               | 50.0% | 6.5(5<br>,7) | 43.8% | 6(5,7<br>)   | 41.9% | 6(5,7<br>)    | No  |
| 38.Does education of people with asymptomatic (absence of symptoms) liver disease result in change of life style and cure/delay the progression (worsening) of liver disease?   | 54.3% | 7(5,8<br>)   | 51.5% | 7(4.5<br>,8) | 53.1% | 7(5,7<br>,75) | No  |
| 39.What are the best treatments that are available for the treatment of pregnant women with cholestasis (condition where bile flow from the liver is obstructed)?               | 38.7% | 6(4,7<br>)   | 31.0% | 6(4.5<br>,7) | 27.6% | 6(5,7<br>)    | No  |
| 40.Is transarterial chemoembolisation (TACE) or transarterial embolisation (TAE) (blocking the blood supply to cancer with or                                                   | 40.6% | 6(4,8<br>)   | 34.4% | 6(4,7<br>)   | 32.3% | 6(5,7<br>)    | No  |

|                                                                                                                                                                                                            |       |               |       |                      |       |                |    |
|------------------------------------------------------------------------------------------------------------------------------------------------------------------------------------------------------------|-------|---------------|-------|----------------------|-------|----------------|----|
| without chemotherapy drugs) effective in the treatment of people with liver metastases?                                                                                                                    |       |               |       |                      |       |                |    |
| 41.Should people with liver metastases (cancer spread to the liver) from neuroendocrine cancer (a form of cancer that arises from cells that secrete hormones and nervous system) undergo liver resection? | 36.7% | 6(4,7<br>.25) | 40.0% | 6(4.7<br>5,7.2<br>5) | 37.9% | 6(5.5<br>,7)   | No |
| 42.What are the best methods available to decrease blood loss during liver resection?                                                                                                                      | 43.8% | 6(5,7<br>.75) | 48.4% | 6(5,8<br>)           | 46.7% | 6(5,7<br>.25)  | No |
| 43.What are the best treatments that cure or delay the progression (worsening) of chronic hepatitis B virus (HBV) infection?                                                                               | 51.6% | 7(4,8<br>)    | 46.7% | 6(4.7<br>5,7.2<br>5) | 48.3% | 6(5,7<br>.5)   | No |
| 44.What are the best treatments for people with polycystic liver disease?                                                                                                                                  | 39.3% | 6(4,8<br>)    | 34.5% | 6(4,8<br>)           | 35.7% | 6(5,7<br>)     | No |
| 45.Should the healthcare professionals dealing with childhood liver diseases be provided additional education about childhood liver                                                                        | 35.5% | 5(3,8<br>)    | 37.9% | 5(3.5<br>,7.5)       | 37.9% | 5(4.5<br>,7.5) | No |

|                                                                                                                                                                                                                     |       |               |       |                |       |              |     |
|---------------------------------------------------------------------------------------------------------------------------------------------------------------------------------------------------------------------|-------|---------------|-------|----------------|-------|--------------|-----|
| diseases compared to standard education where childhood diseases are learnt as part of overall education?                                                                                                           |       |               |       |                |       |              |     |
| 46.What is the best immunosuppressive regimen in children undergoing liver transplantation?                                                                                                                         | 65.6% | 8(4.2<br>5,9) | 67.7% | 8(6,9<br>)     | 70.0% | 8(6,9<br>)   | Yes |
| 47.Should blood vessels supplying the liver be temporarily blocked in people undergoing liver resection? If so, what is the best way of performing this?                                                            | 31.0% | 6(4,7<br>)    | 26.7% | 5.5(4<br>,7)   | 27.6% | 6(5,7<br>)   | No  |
| 48.What is the best treatment that should be given to people who undergo liver transplantation for chronic hepatitis B virus (HBV) infection to prevent reinfection with chronic hepatitis B virus (HBV) infection? | 46.9% | 6(3.5<br>,7)  | 36.7% | 6(3,7<br>)     | 37.9% | 6(5,7<br>)   | No  |
| 49.Are there alternatives to steroids in treating people with autoimmune hepatitis (AIH)?                                                                                                                           | -     | -             | 51.9% | 7(5,8<br>)     | 50.0% | 6.5(5<br>,8) | No  |
| 50.What impact does the home situation have on recovery from chronic liver disease and its treatment?                                                                                                               | -     | -             | 34.5% | 5(3.5<br>,7.5) | 32.1% | 5(4,7<br>)   | No  |



|                                                                                                                                                                                    |   |   |       |                     |       |              |    |
|------------------------------------------------------------------------------------------------------------------------------------------------------------------------------------|---|---|-------|---------------------|-------|--------------|----|
| 51.Does cure of hepatitis C provide benefits to the patient outside reduction in liver related complications?                                                                      | - | - | 29.2% | 5.5(3<br>.25,7<br>) | 30.4% | 6(4,7<br>)   | No |
| 52.How fast does liver fibrosis (scarring) actually progress in non-alcoholic liver disease patients and does this predict overall outcome?                                        | - | - | 62.1% | 7(6,8<br>)          | 64.3% | 7.5(6<br>,8) | No |
| 53.Should direct-acting antiviral treatments therapies be made more easily accessible to GPs and drug service clinics for treatment of hepatitis C virus?                          | - | - | 50.0% | 6.5(3<br>.5,7)      | 52.2% | 7(5,7<br>)   | No |
| 54.Should patients diagnosed with liver fibrosis/cirrhosis related to NAFLD (non-alcoholic fatty liver disease) be offered more intensive nutritional support or dietician review? | - | - | 60.7% | 7(5,8<br>)          | 63.0% | 7(5,8<br>)   | No |
| 55.Why have there been no alternatives to surgery in the form of new drug treatments for gall bladder disease & biliary sludge?                                                    | - | - | 29.2% | 4.5(1<br>.25,7<br>) | 26.1% | 4(2,7<br>)   | No |

|                                                                                                                                                                                                                         |   |   |       |                |       |            |    |
|-------------------------------------------------------------------------------------------------------------------------------------------------------------------------------------------------------------------------|---|---|-------|----------------|-------|------------|----|
| 56. Why is there no proper evidence-based research on nutrition as a way of managing gall bladder disease/biliary sludge?                                                                                               | - | - | 36.0% | 5(1.5,7)       | 33.3% | 5(2,7)     | No |
| 57. Why is there such variability in the natural progression of people with primary sclerosing cholangitis: some are very sick and require a transplant whereas others can remain relatively healthy for a long period? | - | - | 56.0% | 7(6,7)         | 54.2% | 7(6,7)     | No |
| 58. What are the warning signals that primary sclerosing cholangitis will be aggressive or cancerous?                                                                                                                   | - | - | 57.7% | 7(5.7,5,8.2,5) | 60.0% | 7(5.5,8)   | No |
| 59. Does information on the impact of the complication on the people's quality of life improve the patient's informed decision-making process about treatment of liver and gallbladder diseases?                        | - | - | 46.4% | 6(4,7)         | 44.4% | 6(4,7)     | No |
| 60. Will clinical pathways developed with patients and healthcare professionals having an equal say result in greater patient satisfaction and health in people with liver and gallbladder diseases?                    | - | - | 44.8% | 6(4.5,8)       | 46.4% | 6(4.2,5,8) | No |

|                                                                                                                                                                                                           |   |   |       |               |       |                      |    |
|-----------------------------------------------------------------------------------------------------------------------------------------------------------------------------------------------------------|---|---|-------|---------------|-------|----------------------|----|
| <p>61.Should high school teenagers be educated about the risks of hepatitis C?</p>                                                                                                                        | - | - | 53.8% | 7(3.7<br>5,8) | 57.7% | 7(4.7<br>5,7.2<br>5) | No |
| <p>62.How can patients with end stage liver failure be better prepared for end of life. How can the healthcare professionals supporting them be better prepared to provide that support?</p>              | - | - | 65.5% | 7(6,8<br>)    | 67.9% | 7(6,8<br>)           | No |
| <p>63.Is aggressive control of inflammation on colonic inflammatory bowel disease in primary sclerosing cholangitis associated with improved liver outcomes?</p>                                          | - | - | 48.0% | 6(5,7<br>)    | 50.0% | 6.5(5<br>.25,7<br>)  | No |
| <p>64.What is the best way to survey for cholangiocarcinoma in primary sclerosing cholangitis?</p>                                                                                                        | - | - | 61.5% | 7(5.7<br>5,8) | 60.0% | 7(6,8<br>)           | No |
| <p>65.Should the criteria for polycystic liver disease and transplantation be changed to take into account the size the liver cysts can grow and the additional pressures on all the internal organs?</p> | - | - | 29.2% | 4.5(2<br>,7)  | 30.4% | 6(3,7<br>)           | No |

1  
2  
3  
4  
5  
6  
7  
8  
9  
10  
11  
12  
13  
14  
15  
16  
17  
18  
19  
20  
21  
22  
23  
24  
25  
26  
27  
28  
29  
30  
31  
32  
33  
34  
35  
36  
37  
38  
39  
40  
41  
42  
43  
44  
45  
46

|                                                                                                                                                       |   |   |       |             |       |               |    |
|-------------------------------------------------------------------------------------------------------------------------------------------------------|---|---|-------|-------------|-------|---------------|----|
| 66.Does control of colitis at the time of liver transplant reduce the risk of recurrent primary sclerosing cholangitis?                               | - | - | 36.0% | 6(5,7)      | 33.3% | 6(5,7)        | No |
| 67.Are people with liver disease likely to develop other conditions, if so, what other conditions?                                                    | - | - | 42.9% | 6(3.2, 5,7) | 46.4% | 6(3.2, 5,7,7) | No |
| 68.Do people with liver disease have a reduced life expectancy?                                                                                       | - | - | 30.0% | 5.5(3,8)    | 34.5% | 6(3,8)        | No |
| 69.Should transjugular intrahepatic portosystemic shunt (TIPS) be used earlier in management of variceal haemorrhage?                                 | - | - | 51.9% | 7(5,7)      | 55.6% | 7(6,7)        | No |
| 70.Should abnormal alanine transaminase (ALT) reference ranges be revised downwards in line with ACG (American College of Gastroenterology) guidance? | - | - | 36.0% | 6(5,7)      | 37.5% | 6(5,7)        | No |

a Questions from 49 to 70 were collected during the first round of Delphi.

b Consensus was reached when at least 80% of Delphi-panel members scored between 7 and 9 for the specific question.

Abbreviation: IQR = interquartile range

## References

1. Majumdar A, Roccarina D, Thorburn D, Davidson BR, Tsochatzis E, Gurusamy KS. Management of people with early- or very early-stage hepatocellular carcinoma: an attempted network meta-analysis. The Cochrane database of systematic reviews. 2017;3:CD011650. Epub 2017/03/30. doi: 10.1002/14651858.CD011650.pub2. PubMed PMID: 28351116.
2. Saffioti F, Gurusamy KS, Hawkins N, Toon CD, Tsochatzis E, Davidson BR, et al. Pharmacological interventions for primary sclerosing cholangitis: an attempted network meta-analysis. The Cochrane database of systematic reviews. 2017;3:CD011343. Epub 2017/04/19. doi: 10.1002/14651858.CD011343.pub2. PubMed PMID: 28417463.
3. Lombardi R, Onali S, Thorburn D, Davidson BR, Gurusamy KS, Tsochatzis E. Pharmacological interventions for non-alcohol related fatty liver disease (NAFLD): an attempted network meta-analysis. The Cochrane database of systematic reviews. 2017;3:CD011640. Epub 2017/03/31. doi: 10.1002/14651858.CD011640.pub2. PubMed PMID: 28358980.
4. Rodriguez-Peralvarez M, Guerrero-Misas M, Thorburn D, Davidson BR, Tsochatzis E, Gurusamy KS. Maintenance immunosuppression for adults undergoing liver transplantation: a network meta-analysis. The Cochrane database of systematic reviews. 2017;3:CD011639. Epub 2017/04/01. doi: 10.1002/14651858.CD011639.pub2. PubMed PMID: 28362060.
5. Czaja AJ, Carpenter HA, Lindor KD. Ursodeoxycholic acid as adjunctive therapy for problematic type 1 autoimmune hepatitis: a randomized placebo-controlled treatment trial. *Hepatology (Baltimore, Md)*. 1999;30(6):1381-6. Epub 1999/11/26. doi: 10.1002/hep.510300603. PubMed PMID: 10573515.

- 1  
2  
3 6. Manns MP, Woynarowski M, Kreisel W, Lurie Y, Rust C, Zuckerman E, et al. Budesonide induces remission more effectively than prednisone in a  
4 controlled trial of patients with autoimmune hepatitis. *Gastroenterology*. 2010;139(4):1198-206. Epub 2010/07/06. doi: 10.1053/j.gastro.2010.06.046.  
5  
6 PubMed PMID: 20600032.  
7  
8  
9  
10 7. Woynarowski M, Nemeth A, Baruch Y, Koletzko S, Melter M, Rodeck B, et al. Budesonide versus prednisone with azathioprine for the treatment of  
11 autoimmune hepatitis in children and adolescents. *The Journal of pediatrics*. 2013;163(5):1347-53.e1. Epub 2013/07/03. doi: 10.1016/j.jpeds.2013.05.042.  
12  
13 PubMed PMID: 23810723.  
14  
15  
16 8. Saffioti F, Gurusamy KS, Eusebi LH, Tsochatzis E, Davidson BR, Thorburn D. Pharmacological interventions for primary biliary cholangitis: an  
17 attempted network meta-analysis. *The Cochrane database of systematic reviews*. 2017;3:CD011648. Epub 2017/03/30. doi:  
18  
19 10.1002/14651858.CD011648.pub2. PubMed PMID: 28350426.  
20  
21  
22  
23  
24  
25  
26  
27  
28  
29  
30  
31  
32  
33  
34  
35  
36  
37  
38  
39  
40  
41  
42  
43  
44  
45  
46

# BMJ Open

## TOP RESEARCH PRIORITIES IN LIVER AND GALLBLADDER DISORDERS IN THE UNITED KINGDOM

|                                 |                                                                                                                                                                                                                                                                                                                                                                                                                                                                                                                                                                                                                                                                                                                                                                                                                                                                                                                                                                                                                                                                                                                                                                                                                          |
|---------------------------------|--------------------------------------------------------------------------------------------------------------------------------------------------------------------------------------------------------------------------------------------------------------------------------------------------------------------------------------------------------------------------------------------------------------------------------------------------------------------------------------------------------------------------------------------------------------------------------------------------------------------------------------------------------------------------------------------------------------------------------------------------------------------------------------------------------------------------------------------------------------------------------------------------------------------------------------------------------------------------------------------------------------------------------------------------------------------------------------------------------------------------------------------------------------------------------------------------------------------------|
| Journal:                        | <i>BMJ Open</i>                                                                                                                                                                                                                                                                                                                                                                                                                                                                                                                                                                                                                                                                                                                                                                                                                                                                                                                                                                                                                                                                                                                                                                                                          |
| Manuscript ID                   | bmjopen-2018-025045.R1                                                                                                                                                                                                                                                                                                                                                                                                                                                                                                                                                                                                                                                                                                                                                                                                                                                                                                                                                                                                                                                                                                                                                                                                   |
| Article Type:                   | Research                                                                                                                                                                                                                                                                                                                                                                                                                                                                                                                                                                                                                                                                                                                                                                                                                                                                                                                                                                                                                                                                                                                                                                                                                 |
| Date Submitted by the Author:   | 13-Dec-2018                                                                                                                                                                                                                                                                                                                                                                                                                                                                                                                                                                                                                                                                                                                                                                                                                                                                                                                                                                                                                                                                                                                                                                                                              |
| Complete List of Authors:       | Gurusamy, Kurinchi; University College London, Walmsley, Martine; PSC Support<br>Davidson, Brian; Royal Free London NHS Foundation Trust, HPB Surgery<br>Frier, Claire; Royal Free London NHS Foundation Trust, HPB Surgery<br>Fuller, Barry; University College London<br>Madden, Angela; University of Hertfordshire<br>Masson, Steven; Freeman Hospital<br>Morley, Richard; Cochrane Collaboration Consumer Network<br>Safarik, Ivana; Carolside Medical Centre<br>Tsochatzis, E; University College London<br>Ahmed, Irfan; NHS Grampian<br>Cowlin, Maxine; Patient representative<br>Dillon, John; University of Dundee Division of Cardiovascular and Diabetes Medicine, Liver Group<br>Ellicott, Graham; Patient representative<br>Elsharkawy, Ahmed; Queen Elizabeth Hospital Birmingham<br>Farrington, Liz; Royal Cornwall Hospitals NHS Trust<br>Glachan, Anthony; Patient representative<br>Kumar, Nagappan; University Hospital of Wales<br>Milne, EJ; Patient representative<br>Rushbrook, Simon; Norfolk and Norwich University Hospitals NHS Foundation Trust,<br>Smith, Amanda; Queen Elizabeth Hospital Birmingham<br>Stafford, Lizzie; John Radcliffe Hospital<br>Yeoman, Andrew; Royal Gwent Hospital |
| <b>Primary Subject Heading</b>: | Gastroenterology and hepatology                                                                                                                                                                                                                                                                                                                                                                                                                                                                                                                                                                                                                                                                                                                                                                                                                                                                                                                                                                                                                                                                                                                                                                                          |
| Secondary Subject Heading:      | Gastroenterology and hepatology                                                                                                                                                                                                                                                                                                                                                                                                                                                                                                                                                                                                                                                                                                                                                                                                                                                                                                                                                                                                                                                                                                                                                                                          |
| Keywords:                       | liver, chronic liver disease, research priorities                                                                                                                                                                                                                                                                                                                                                                                                                                                                                                                                                                                                                                                                                                                                                                                                                                                                                                                                                                                                                                                                                                                                                                        |
|                                 |                                                                                                                                                                                                                                                                                                                                                                                                                                                                                                                                                                                                                                                                                                                                                                                                                                                                                                                                                                                                                                                                                                                                                                                                                          |

SCHOLARONE™  
Manuscripts

# 1 TOP RESEARCH PRIORITIES IN LIVER AND

## 2 GALLBLADDER DISORDERS IN THE UNITED KINGDOM

3 Kurinchi S Gurusamy<sup>1</sup>, Martine Walmsley<sup>2</sup>, Brian R Davidson<sup>3</sup>, Claire Frier<sup>4</sup>, Barry Fuller<sup>5</sup>, Angela  
4 Madden<sup>6</sup>, Steven Masson<sup>7</sup>, Richard Morley<sup>8</sup>, Ivana Safarik<sup>9</sup>, Emmanuel A Tsochatzis<sup>10</sup>, Irfan Ahmed<sup>11</sup>,  
5 Maxine Cowlin<sup>12</sup>, John F Dillon<sup>13</sup>, Graham Ellicott<sup>12</sup>, Ahmed M Elsharkawy<sup>14</sup>, Liz Farrington<sup>15</sup>, Anthony  
6 Glachan<sup>12</sup>, Nagappan Kumar<sup>16</sup>, EJ Milne<sup>12</sup>, Simon M Rushbrook<sup>17</sup>, Amanda Smith<sup>18</sup>, Lizzie Stafford<sup>19</sup>,  
7 Andrew Yeoman<sup>20</sup>

8 <sup>1</sup>Professor of Evidence-based Medicine and Surgery, Division of Surgery and Interventional Science,  
9 University College London, United Kingdom

10 <sup>2</sup>Chair of Trustees, PSC Support, United Kingdom

11 <sup>3</sup>Professor of Surgery, Royal Free Campus, University College London, United Kingdom

12 <sup>4</sup>Cancer nurse specialist, HPB, Royal Free Hospital, London, United Kingdom

13 <sup>5</sup>Professor of Surgery, Royal Free Campus, University College London, United Kingdom

14 <sup>6</sup>Subject Group Lead for Nutrition and Dietetics, University of Hertfordshire, United Kingdom

15 <sup>7</sup>Consultant hepatologist, Freeman Hospital, Newcastle, United Kingdom

16 <sup>8</sup>James-Lind Alliance advisor

17 <sup>9</sup>General Practitioner, Carolside Medical Centre, Clarkston, Glasgow, United Kingdom

18 <sup>10</sup>Senior lecturer in Hepatology/Consultant hepatologist, UCL Institute for Liver and Digestive Health  
19 Royal Free Hospital and University College London, United Kingdom

20 <sup>11</sup>Professor of Surgery, NHS Grampian, Aberdeen, United Kingdom



- 1  
2  
3 21 <sup>12</sup>Patient and public representative, United Kingdom  
4  
5  
6 22 <sup>13</sup>Professor of Hepatology & Gastroenterology, NHS Tayside, Gastroenterology Dundee, UK  
7  
8  
9 23 <sup>14</sup>Consultant Hepatologist, Queen Elizabeth Hospital, Birmingham, United Kingdom  
10  
11  
12 24 <sup>15</sup>Consultant Nurse Hepatology, Royal Cornwall Hospital, Truro, United Kingdom  
13  
14  
15 25 <sup>16</sup>Consultant HPB Surgeon, University Hospital of Wales, Cardiff, United Kingdom  
16  
17  
18 26 <sup>17</sup>Consultant Hepatologist, Norfolk and Norwich University Hospital, Norwich, United Kingdom  
19  
20  
21 27 <sup>18</sup>Specialist Pharmacist – Liver, Queen Elizabeth Hospital, Birmingham, United Kingdom  
22  
23  
24 28 <sup>19</sup>Hepatology Research Nurse, John Radcliffe Hospital, Oxford, United Kingdom  
25  
26  
27 29 <sup>20</sup>Consultant Hepatologist, Royal Gwent Hospital, Newport, United Kingdom  
28  
29  
30 30 Corresponding author: Kurinchi S Gurusamy  
31  
32 31 Postal address: Floor 9, Royal Free Hospital, Royal Free Campus UCL, Rowland Hill Street, London  
33  
34 32 NW3 2PF; Email: [k.gurusamy@ucl.ac.uk](mailto:k.gurusamy@ucl.ac.uk)  
35  
36  
37 33 Word count: 3569  
38  
39  
40 34 Keywords: liver, chronic liver disease  
41  
42  
43  
44  
45  
46  
47  
48  
49  
50  
51  
52  
53  
54  
55  
56  
57  
58  
59  
60

## 35 ABSTRACT

36 Objectives: There is a mismatch between research questions considered important by patients,  
37 carers, and healthcare professionals and the research performed in many fields of medicine. The  
38 Non-Alcohol-Related Liver and gallbladder disorders Priority setting partnership (NARLIP) was  
39 established to identify the top research priorities in the prevention, diagnostic, and treatment of  
40 gallbladder disorders and liver disorders not covered by the James-Lind Alliance (JLA) Alcohol-related  
41 liver disease (ARLD) Priority Setting Partnership.

42 Design: The methods broadly followed the principles of the JLA guidebook. The one major deviation  
43 from the JLA methodology was the final step of identifying priorities: instead of prioritisation by  
44 group discussions at a consensus workshop involving stakeholders, the prioritisation was achieved  
45 by a modified Delphi consensus process.

46 Results: A total of 428 unique valid diagnostic or treatment research questions were identified. A  
47 literature review established that none of these questions were considered 'answered' i.e. high  
48 quality systematic reviews suggest that further research is not required on the topic. The Delphi  
49 panel achieved consensus (at least 80% Delphi panel members agreed) that a research question was  
50 a top research priority for six questions. Four additional research questions with highest proportion  
51 of Delphi panel members ranking the question as highly important were added to constitute the top  
52 10 research priorities.

53 Conclusions: A priority setting process involving patients, carers and healthcare professionals has  
54 been used to identify the top ten priority areas for research related to liver and gallbladder  
55 disorders. Basic, translational, clinical, and public health research are required to address these  
56 uncertainties.

57 Keywords: liver, chronic liver disease

1  
2  
3 58 Word count: 3618  
4  
5  
6

## 7 59 ARTICLE SUMMARY 8 9

### 10 11 60 Strengths and limitations 12 13

- 14  
15 61 • A research prioritisation process involving clinicians, patients and carer, and public  
16  
17 62 representatives was performed in the field of liver and gallbladder disorders. This will help to  
18  
19 63 address the mismatch between research questions that are considered important jointly by  
20  
21 64 patients, carers, and healthcare professionals and the research performed in the field of liver  
22  
23 65 and gallbladder disorders.  
24  
25 66 • A Delphi consensus method was performed. This prevented dominance of 'loud voices', a  
26  
27 67 problematic issue with small and large group discussions.  
28  
29 68 • Because of the predominance of people with chronic liver disease on the Delphi panel, many  
30  
31 69 of the top research priorities related to chronic liver diseases.  
32  
33  
34  
35

## 36 37 70 INTRODUCTION 38 39 40

41 71 Failure to address treatment uncertainties by research can lead to significant suffering and deaths <sup>1</sup>.  
42  
43 72 It is important that research in any field of medicine takes into account the shared interests of  
44  
45 73 patients, carers and clinicians <sup>2</sup>. However, there is a mismatch between research questions that are  
46  
47 74 considered important jointly by patients, carers, and healthcare professionals and the research  
48  
49 75 performed in many fields of medicine <sup>3,4</sup>. The James Lind Alliance (JLA) exists to help ensure a  
50  
51 76 patient-centred process and enables the limited research resources to be utilised in addressing the  
52  
53 77 research questions that are considered important jointly by patients, carers, and healthcare  
54  
55 78 professionals <sup>2</sup> ('top research priorities'). This is achieved by forming 'Priority Setting Partnerships'  
56  
57  
58  
59  
60

79 (PSPs) between patients, carers, and healthcare professionals<sup>2</sup>. Formal prioritisation of research  
80 topics jointly by patients and healthcare professionals can lead to increased research on the topic<sup>5,6</sup>.

81 There has only been one formal research prioritisation process involving patients, carers,  
82 and healthcare professionals in the field of liver and gallbladder disorders<sup>7</sup>. However, the scope of  
83 that PSP was limited to alcohol-related liver disorders<sup>7</sup>. The Non-Alcohol-Related Liver and  
84 gallbladder disorders Priority setting partnership (NARLIP) was established to address the  
85 prevention, diagnostic, and treatment uncertainties related to the majority of liver disorders which  
86 were not covered by the JLA PSP on alcohol-related liver diseases (ARLD)<sup>7</sup> and to include gallbladder  
87 disease.

88 The aims and objectives of the NARLIP were to work with patients, their carers, and  
89 healthcare professionals treating them ('stakeholders') to identify uncertainties about the diagnostic  
90 tests and effects of prevention and treatments for non-alcohol related liver and gallbladder  
91 disorders, to agree by consensus a prioritised list of those uncertainties for research, to publicise the  
92 results and process, and to take the results to research commissioning bodies to be considered for  
93 funding and researchers to encourage them to submit grant applications addressing these  
94 uncertainties.

## 95 METHODS

96 The methods broadly followed the principles of the JLA guidebook.<sup>8</sup> The broad steps involved the  
97 following and are summarised in Figure 1.

- 98 1. Formation of the partnership: organisations and individuals representing people affected by  
99 non-alcohol related liver or gallbladder disorders, their carers, and healthcare professionals  
100 treating people with non-alcohol related liver and gallbladder disorders. A partnership was  
101 formed between KG representing University College London and the British Liver Trust  
102 initially, but following reorganisation in the British Liver Trust, PSC Support<sup>9</sup> became the

1  
2  
3 103 leading patient organisation partner of this process. A steering committee was formed. The  
4  
5 104 members of the steering committee who participated in the complete process were KG,  
6  
7 105 MW, BRD, CF, BF, AM, RM, SM, IS, and ET.  
8  
9  
10 106 2. Establishment of the scope: the steering committee members discussed and decided that  
11  
12 107 the scope should include adult and paediatric liver and gallbladder disorders which required  
13  
14 108 medical and surgical treatments. The protocol was registered with James-Lind Alliance  
15  
16 109 Priority Setting Partnership.  
17  
18  
19 110 3. Identifying potential research questions: research questions were collected through online  
20  
21 111 surveys and searching UK Database of Uncertainties about the Effects of Treatments (UK  
22  
23 112 DUETs), research recommendations in high quality systematic reviews and clinical  
24  
25 113 guidelines, and registers of ongoing research.  
26  
27  
28 114 4. Refining research questions: the research questions identified in the above step were  
29  
30 115 reviewed and where necessary combined to result in a set of unique research questions.  
31  
32 116 Research questions were considered 'answered' when recent high-quality systematic  
33  
34 117 reviews (based on low risk of bias studies) concluded that further research was not required.  
35  
36 118 Removal of such 'answered' research questions was planned. The remaining questions were  
37  
38 119 'uncertainties'.  
39  
40  
41 120 5. Interim prioritisation: To shortlist the set of questions to manageable levels for the final  
42  
43 121 prioritisation process, the members of the steering committee ranked the uncertainties after  
44  
45 122 stratifying the questions as medical and surgical questions. The members of the steering  
46  
47 123 committee agreed that the interim prioritisation list should consist of 75% medical questions  
48  
49 124 and 25% surgical questions. This decision was an arbitrary decision made by the steering  
50  
51 125 committee based on the rationale that majority of individuals with liver and gallbladder  
52  
53 126 disorders are treated medically but a minority require surgery which have a major impact on  
54  
55 127 patients' lives.  
56  
57  
58  
59  
60

- 1  
2  
3 128 6. Final prioritisation by consensus: A modified Delphi consensus method was followed to  
4  
5 129 identify the top priorities using methods described by Jones et al <sup>10</sup>. The Delphi was  
6  
7 130 performed electronically using Excel for managing the process. The steps in the modified  
8  
9 Delphi consensus method were as follows.  
10 131  
11  
12 132 a. A Delphi panel consisting of patients, their carers, and healthcare professionals  
13  
14 133 treating them was formed. The Delphi panel was formed by using 'snowballing'  
15  
16 134 sampling methods and by contacting people through emails, online liver patient  
17  
18 135 forums (British Liver Trust Health Unlocked forum), and newsletters. A total of 42  
19  
20 136 people expressed interest in joining the Delphi panel and 33 panel members  
21  
22 137 completed all three rounds. Details of the Delphi panel composition and drop-outs  
23  
24 138 are reported in the results section.  
25  
26  
27 139 b. A total of three rounds were conducted.  
28  
29  
30 140 c. Delphi panel members scored the short-listed questions in the interim prioritisation  
31  
32 141 process on a scale of 1 to 9 with 1 being considered least important and 9 being  
33  
34 142 considered most important. Scores of 1 to 3 were categorised as 'less important', 4  
35  
36 143 to 6 as 'moderately important', and 7 to 9 as 'highly important'. Panel members  
37  
38 144 were requested to score the questions according to the importance of the question  
39  
40 145 to them/the persons that they represent or treat and could leave questions that  
41  
42 146 they were unable to score empty. Each Delphi panel member could add a maximum  
43  
44 147 of two questions in the first round to ensure that the questions most important to  
45  
46 148 the Delphi panel members were included in the prioritisation process even if they  
47  
48 149 were not identified in the earlier steps. In the subsequent rounds, the panel  
49  
50 150 members were shown the summary scores and their previous score for each  
51  
52 151 question. They were able to retain or change their score in each of the rounds after  
53  
54 152 the first round. For calculation of the summary scores and the proportion  
55  
56 153 considering a question 'highly important', non-responses were excluded.  
57  
58  
59  
60

- 1  
2  
3 154 d. Consensus about a specific research question being a top research priority was  
4  
5 155 reached when 80% or more Delphi panel members considered the research question  
6  
7 156 as highly important (allocated scores between 7 and 9).  
8  
9  
10 157 e. When fewer than 10 research priorities were obtained by consensus, the remaining  
11  
12 158 priorities were completed by uncertainties based on the highest proportions of  
13  
14 159 panel members agreeing that the research question was highly important (scores  
15  
16 160 between 7 and 9).  
17  
18  
19 161 f. There was no restriction on the Delphi panel to consult others while scoring the  
20  
21 162 questions. However, only one final response on the set of questions was accepted  
22  
23 163 from each Delphi panel member.  
24  
25

26 164 When there were no recent high-quality systematic reviews on the research question, we have  
27  
28 165 recommended high-quality systematic reviews. When recent high-quality systematic reviews  
29  
30 166 recommended high-quality research, we have recommended randomised controlled trials for  
31  
32  
33 167 prevention and treatment, as such studies carry the lowest risk of bias if conducted well; we would  
34  
35 168 have recommended well conducted diagnostic test accuracy studies for diagnostic uncertainties. All  
36  
37 169 online surveys were completed using Google Forms designed by KG. The Delphi process was  
38  
39 170 completed using Microsoft Excel and email.  
40  
41

42 171 Ethical approval was not deemed necessary because no personal identifiable information  
43  
44 172 was being collected, and the questions were being asked of healthcare professionals, patients and  
45  
46 173 their carers were not considered sensitive questions. In addition, we had full support of patient  
47  
48 174 organisations with involvement of patient representatives throughout the whole process rather than  
49  
50 175 patients visiting the hospitals.  
51  
52  
53  
54  
55  
56  
57  
58  
59  
60

## 176 Patient and Public involvement

177 Patients and public were involved in all aspects of this project: they were part of the steering  
178 committee and were involved in the definition of the scope, methodology used for the prioritisation  
179 process, identification of further patients and public representatives, participation in the Delphi  
180 panel, interpretation, and critical revisions of the draft report. They will be involved in the  
181 dissemination of the findings through patient websites, patient forums, and to research funders.

## 182 RESULTS

### 183 Identification and refining of research uncertainties

184 A total of 126 patients, carers, and those at risk of developing non-alcohol related liver and  
185 gallbladder disorders, and 13 healthcare professionals participated in the first survey which was  
186 conducted between July and December 2015. This survey resulted in a total of 209 unique research  
187 questions. In addition, 219 unique questions were identified from searching the UK DUETs, Pubmed,  
188 and ClinicalTrials.gov on 2<sup>nd</sup> January 2016. A total of 428 unique valid (i.e. falling within the remit of  
189 this priority setting partnership) research questions (247 medical-related and 181 surgery-related)  
190 were identified from these sources. None of the research questions had been answered by recent  
191 high-quality systematic reviews based on low risk of bias studies which concluded that further  
192 research was not required. Therefore, all the 428 research questions were considered research  
193 'uncertainties'. The complete list of 428 unique valid uncertainties in no particular order is available  
194 in Online Supplement Appendix 1. This has been converted to the population, intervention, control,  
195 and outcomes (PICO) format whenever possible.



## 196 Interim priorities

197 To identify a shortlist of questions (from the list of 429 questions) that were to be considered for the  
198 next step, a total of 48 research priorities (36 medical questions and 12 surgical questions) were  
199 identified on the basis of being selected by at least one patient or carer and healthcare professional  
200 of the steering committee (24 questions) and obtaining the highest ranks among the members of the  
201 steering committee (additional 24 questions). The list of 48 questions identified as interim priorities  
202 in no particular order is available in Online Supplement Appendix 2.

## 203 Final priorities

204 A total of 42 people expressed interest in joining the Delphi panel and 33 panel members completed  
205 all three rounds. Five people dropped out before they returned the scores of the first round (all  
206 patients, carers, and general public), three between first and second rounds (all healthcare  
207 professionals), and one between the second and third rounds (healthcare professional). Of the 33  
208 panel members who completed all the three rounds, 17 were healthcare professionals and 16 were  
209 patients, carers, and general public. Of the 17 healthcare professionals, six were hepatologists, four  
210 were surgeons, two were hepatology nurses, and the remaining were general practitioner (GP), HPB  
211 surgery (hepato-pancreato biliary) nurse, organ preservation biologist, dietician, and pharmacist  
212 (one each). Of the 16 patients, carers, and general public, there was representation from general  
213 public and various liver diseases including autoimmune diseases such as primary sclerosing  
214 cholangitis, primary biliary cholangitis, autoimmune hepatitis, viral hepatitis, metabolic diseases  
215 such as non-alcohol related fatty liver disease, and other diseases such as hepatocellular carcinoma  
216 and polycystic liver disease. There was also representation of liver transplanted patients in the  
217 Delphi panel. In total, 23 panel members were from England, seven were from Scotland, and three  
218 were from Wales. There were no panel members from Northern Ireland despite attempts to include  
219 panel members from Northern Ireland.

220 A total of 22 additional questions were added by the Delphi panel members in the first  
 221 round of the Delphi process. The Delphi panel achieved consensus that an uncertainty was a top  
 222 research priority for six research questions. Four additional research questions with the highest  
 223 proportion of Delphi panel members scoring the question as highly important (scores between 7 and  
 224 9) were added to constitute the top 10 research priorities. The list of the top 10 research priorities  
 225 (in the order of proportion who agreed that the uncertainty is a very important research priority) is  
 226 available in Table 1. All the top 10 research priorities were prevention and treatment uncertainties,  
 227 and none were diagnostic test uncertainties. None of the panel members thought the first two  
 228 questions as least important (scores of 1 to 3). For the remaining 8 questions, 3% to 6.5% of people  
 229 considered the questions to be least important (scores of 1 to 3).

230 **Table 1 Treatment uncertainties for which consensus that the uncertainty is a**  
 231 **research priority was reached**

| Treatment uncertainty (Research question)                                                                            | Proportion who rated this question as highly important in the final round | Median (interquartile range) in the final round |
|----------------------------------------------------------------------------------------------------------------------|---------------------------------------------------------------------------|-------------------------------------------------|
| What is the best treatment for people with early or very early hepatocellular carcinoma (HCC)?                       | 93.5%                                                                     | 8(7,9)                                          |
| What are the best treatments that cure or delay the progression (worsening) of primary sclerosing cholangitis (PSC)? | 93.3%                                                                     | 8(7,9)                                          |

|                                                                                        |                                                                                                                                                                                                                                                                                                          |       |           |
|----------------------------------------------------------------------------------------|----------------------------------------------------------------------------------------------------------------------------------------------------------------------------------------------------------------------------------------------------------------------------------------------------------|-------|-----------|
| 1<br>2<br>3<br>4<br>5<br>6<br>7<br>8<br>9                                              | What are the best treatments that cure or delay the progression (worsening) of non-alcohol-related fatty liver disease (NAFLD)?                                                                                                                                                                          | 90.3% | 9(8,9)    |
| 10<br>11<br>12<br>13<br>14                                                             | What is the best immunosuppressive regimen in adults undergoing liver transplantation?                                                                                                                                                                                                                   | 90.3% | 8(7,9)    |
| 15<br>16<br>17<br>18<br>19<br>20<br>21<br>22                                           | Should general public be educated about non-alcohol-related fatty liver disease (NAFLD) with an aim to reduce the numbers of those that have it?                                                                                                                                                         | 81.8% | 8(7,9)    |
| 23<br>24<br>25<br>26<br>27                                                             | What are the best treatments that cure or delay the progression (worsening) of autoimmune hepatitis (AIH)?                                                                                                                                                                                               | 80.6% | 8(7,9)    |
| 28<br>29<br>30<br>31<br>32<br>33<br>34                                                 | What are the best treatments that cure or delay the progression (worsening) of non-alcohol related steatohepatitis (NASH)?                                                                                                                                                                               | 76.7% | 8(6.75,9) |
| 35<br>36<br>37<br>38<br>39<br>40<br>41<br>42<br>43<br>44<br>45<br>46<br>47<br>48<br>49 | Prior to liver transplantation, is it better to transport the donor liver using a machine which pumps blood or preservation solution through the liver (machine perfusion) or is it better to transport it in the standard way of transporting it immersed in cold preservation solution (cold storage)? | 74.2% | 7(6,9)    |
| 50<br>51<br>52<br>53<br>54<br>55<br>56<br>57<br>58<br>59<br>60                         | What are the best treatments that cure or delay the progression (worsening) of primary biliary cholangitis (PBC)?                                                                                                                                                                                        | 74.2% | 7(6,8)    |

|                                                                                                 |       |        |
|-------------------------------------------------------------------------------------------------|-------|--------|
| Are there any treatments that reverse the liver damage in primary sclerosing cholangitis (PSC)? | 72.4% | 7(6,9) |
|-------------------------------------------------------------------------------------------------|-------|--------|

232

233 A summary of the availability of systematic review of randomised controlled trials on the topic of the  
 234 individual questions, randomised controlled trials on the topic not included in the systematic review  
 235 (if one exists), and the outcomes evaluated in these RCTs are listed in Table 2. Table 2 also contains a  
 236 suggestion for the next research steps. The list of the existing trials was compiled by searching  
 237 ClinicalTrials.gov on 7<sup>th</sup> April 2018. The references to the trials not included in the systematic reviews  
 238 is available in Online Supplement Appendix 3. As seen in Table 2, a well-designed RCT is the next  
 239 step for eight of these top 10 research questions. This is because it appears that the outcomes in  
 240 those trials will not address the outcomes listed in the research questions.

241 **Table 2 Next step to address the top 10 research priorities based on current**  
 242 **best evidence (summary)**

| Treatment uncertainty (Research question) | High-quality systematic review <sup>a,b</sup> | RCTs not included in the systematic review <sup>a,c</sup> | Patient-oriented outcomes assessed in trials not included in the systematic review <sup>d</sup> | Next step |
|-------------------------------------------|-----------------------------------------------|-----------------------------------------------------------|-------------------------------------------------------------------------------------------------|-----------|
|                                           |                                               |                                                           |                                                                                                 |           |

|                                                                                                                                                                                                                                                                                                                                                                                                       |                       |                                      |                                                                           |                                                                                                                                                  |
|-------------------------------------------------------------------------------------------------------------------------------------------------------------------------------------------------------------------------------------------------------------------------------------------------------------------------------------------------------------------------------------------------------|-----------------------|--------------------------------------|---------------------------------------------------------------------------|--------------------------------------------------------------------------------------------------------------------------------------------------|
| <p>1<br/>2<br/>3<br/>4<br/>5<br/>6<br/>7<br/>8<br/>9<br/>10<br/>11<br/>12<br/>13<br/>14<br/>15<br/>16<br/>17<br/>18<br/>19<br/>20<br/>21<br/>22<br/>23<br/>24<br/>25<br/>26<br/>27<br/>28<br/>29<br/>30<br/>31<br/>32<br/>33<br/>34<br/>35<br/>36<br/>37<br/>38<br/>39<br/>40<br/>41<br/>42</p> <p>What is the best treatment for people with early or very early hepatocellular carcinoma (HCC)?</p> | <p>11</p>             | <p>8 trials</p>                      | <p>Survival (7 trials), recurrence (5 trials), morbidity (3 trials)</p>   | <p>High-quality RCTs of interventions not covered in ongoing trials and comparison of health-related quality (HRQoL) in different treatments</p> |
| <p>43<br/>44<br/>45<br/>46<br/>47<br/>48<br/>49<br/>50<br/>51<br/>52<br/>53</p> <p>What are the best treatments that cure or delay the progression (worsening) of primary sclerosing cholangitis (PSC)?</p>                                                                                                                                                                                           | <p>12</p>             | <p>9 trials</p>                      | <p>None of the trials include survival, HRQoL as outcomes<sup>e</sup></p> | <p>High-quality RCTs with clinical outcomes</p>                                                                                                  |
| <p>54<br/>55<br/>56<br/>57<br/>58<br/>59<br/>60</p> <p>What are the best treatments that cure or delay the progression (worsening) of</p>                                                                                                                                                                                                                                                             | <p>13<br/>(includ</p> | <p>More than 10 published trials</p> | <p>Lifestyle intervention</p>                                             | <p>High-quality</p>                                                                                                                              |

1  
2  
3  
4  
5  
6  
7  
8  
9  
10  
11  
12  
13  
14  
15  
16  
17  
18  
19  
20  
21  
22  
23  
24  
25  
26  
27  
28  
29  
30  
31  
32  
33  
34  
35  
36  
37  
38  
39  
40  
41  
42  
43  
44  
45  
46  
47  
48  
49  
50  
51  
52  
53  
54  
55  
56  
57  
58  
59  
60

|                                                         |                                                                           |                                                                                                                                                                                                                                        |                                                                                                                                                                                                                                                                                                                                                                  |                                                                                                                                                                                                                                                                                                                 |
|---------------------------------------------------------|---------------------------------------------------------------------------|----------------------------------------------------------------------------------------------------------------------------------------------------------------------------------------------------------------------------------------|------------------------------------------------------------------------------------------------------------------------------------------------------------------------------------------------------------------------------------------------------------------------------------------------------------------------------------------------------------------|-----------------------------------------------------------------------------------------------------------------------------------------------------------------------------------------------------------------------------------------------------------------------------------------------------------------|
| <p>non-alcohol-related fatty liver disease (NAFLD)?</p> | <p>es only<br/>pharm<br/>acolog<br/>ical<br/>interv<br/>ention<br/>s)</p> | <p>on lifestyle<br/>interventions<br/>and more than<br/>20 trials on<br/>nutritional<br/>supplementation<br/>with no recent<br/>high-quality<br/>systematic<br/>reviews<br/><u>Pharmacological<br/>interventions</u><br/>44 trials</p> | <p>s and<br/>nutritional<br/>supplement<br/>ation<br/>Not<br/>applicable<br/>as there are<br/>no high<br/>quality<br/>systematic<br/>reviews<br/><u>Pharmacolo<br/>gical<br/>intervention<br/>s</u><br/>Health-<br/>related<br/>quality of<br/>life (2 trials),<br/>resolution of<br/>fatty liver<br/>disease (11<br/>trials),<br/>mortality (2<br/>trials),</p> | <p>systemati<br/>c reviews<br/>on<br/>lifestyle<br/>interventi<br/>ons (one<br/>review)<br/>and<br/>nutritiona<br/>l<br/>suppleme<br/>ntation to<br/>cure or<br/>delay the<br/>progressio<br/>n of<br/>NAFLD<br/>and<br/>high-<br/>quality<br/>RCTs on<br/>pharmaco<br/>logical<br/>interventi<br/>ons with</p> |
|---------------------------------------------------------|---------------------------------------------------------------------------|----------------------------------------------------------------------------------------------------------------------------------------------------------------------------------------------------------------------------------------|------------------------------------------------------------------------------------------------------------------------------------------------------------------------------------------------------------------------------------------------------------------------------------------------------------------------------------------------------------------|-----------------------------------------------------------------------------------------------------------------------------------------------------------------------------------------------------------------------------------------------------------------------------------------------------------------|

|                                                                                        |                                                                                            |                                                                                                                                                                          |                                                                                                                                                                                                                                                                 |                                                                                                                                                                                              |
|----------------------------------------------------------------------------------------|--------------------------------------------------------------------------------------------|--------------------------------------------------------------------------------------------------------------------------------------------------------------------------|-----------------------------------------------------------------------------------------------------------------------------------------------------------------------------------------------------------------------------------------------------------------|----------------------------------------------------------------------------------------------------------------------------------------------------------------------------------------------|
|                                                                                        |                                                                                            |                                                                                                                                                                          | cirrhosis (2 trials), cardiovascular events (2 trials) <sup>e</sup>                                                                                                                                                                                             | clinical outcomes                                                                                                                                                                            |
| What is the best immunosuppressive regimen in adults undergoing liver transplantation? | <sup>14</sup><br>(cover<br>s only<br>maint<br>enanc<br>e<br>immu<br>nosup<br>pressi<br>on) | <u>Induction</u><br><u>immunosuppress</u><br><u>ion</u> More than<br>20 published<br>trials<br><br><u>Maintenance</u><br><u>immunosuppress</u><br><u>ion</u><br>4 trials | <u>Induction</u><br><u>immunosup</u><br><u>pression</u><br><br>Not<br>applicable<br>as there is<br>no high<br>quality<br>systematic<br>review<br><br><u>Maintenanc</u><br><u>e</u><br><u>immunosup</u><br><u>pression</u><br><br>Graft<br>survival (1<br>trial) | High-<br>quality<br>systemati<br>c review<br>on<br>induction<br>immunos<br>uppressiv<br>e regimen<br>and<br>high-<br>quality<br>RCTs on<br>maintena<br>nce<br>immunos<br>uppressio<br>n with |

|                                                                                                                                                  |                                                                                                                                                      |           |                                                                             |                                                 |
|--------------------------------------------------------------------------------------------------------------------------------------------------|------------------------------------------------------------------------------------------------------------------------------------------------------|-----------|-----------------------------------------------------------------------------|-------------------------------------------------|
|                                                                                                                                                  |                                                                                                                                                      |           | Adverse events (1 trial)<br>Hepatocellular carcinoma (1 trial) <sup>e</sup> | important clinical outcomes                     |
| Should general public be educated about non-alcohol-related fatty liver disease (NAFLD) with an aim to reduce the numbers of those that have it? | None                                                                                                                                                 | None      | -                                                                           | High-quality RCTs on education to prevent NAFLD |
| What are the best treatments that cure or delay the progression (worsening) of autoimmune hepatitis (AIH)?                                       | None                                                                                                                                                 | 15 trials | Survival (1 trial), health-related quality of life (1 trial) <sup>e</sup>   | High quality RCTs with clinical outcomes        |
| What are the best treatments that cure or delay the progression (worsening) of non-alcohol related steatohepatitis (NASH)?                       | The evidence related to this question is covered under non-alcohol related fatty liver disease by performing a subgroup analysis of people with NASH |           |                                                                             |                                                 |



|                                                                                                                                                                                                                                                                                                                 |                                                                                                                                                                           |                  |                                                                                                          |                                                                                                                              |
|-----------------------------------------------------------------------------------------------------------------------------------------------------------------------------------------------------------------------------------------------------------------------------------------------------------------|---------------------------------------------------------------------------------------------------------------------------------------------------------------------------|------------------|----------------------------------------------------------------------------------------------------------|------------------------------------------------------------------------------------------------------------------------------|
| <p>Prior to liver transplantation, is it better to transport the donor liver using a machine which pumps blood or preservation solution through the liver (machine perfusion) or is it better to transport it in the standard way of transporting it immersed in cold preservation solution (cold storage)?</p> | <p>None</p>                                                                                                                                                               | <p>5 trials</p>  | <p>Overall survival (4 trials), graft survival (5 trials), health-related quality of life (2 trials)</p> | <p>Await results of the RCTs (all expected to complete by the end of 2019) and perform a high quality systematic review.</p> |
| <p>What are the best treatments that cure or delay the progression (worsening) of primary biliary cholangitis (PBC)?</p>                                                                                                                                                                                        | <p><sup>15</sup></p>                                                                                                                                                      | <p>24 trials</p> | <p>Health-related quality of life (5 trials), relief of symptoms (5 trials)<sup>e</sup></p>              | <p>High-quality RCTs with clinical outcomes</p>                                                                              |
| <p>Are there any treatments that reverse the liver damage in primary sclerosing cholangitis (PSC)?</p>                                                                                                                                                                                                          | <p>The evidence related to this question is covered under treatments for primary sclerosing cholangitis. The systematic review did not include fibrosis as one of the</p> |                  |                                                                                                          |                                                                                                                              |

|  |                                                                                                                                                                                             |
|--|---------------------------------------------------------------------------------------------------------------------------------------------------------------------------------------------|
|  | outcomes. Nine of the trials included in the systematic review reported on fibrosis. Two of the trials not included in the systematic review (and listed above) reported on liver fibrosis. |
|--|---------------------------------------------------------------------------------------------------------------------------------------------------------------------------------------------|

243

244 a Numbers indicate the reference number.

245 b Further well-designed randomised controlled trials using clinical outcomes were recommended by  
246 all these systematic reviews.

247 c Ongoing trials, unpublished trials, or trials published since the search date for the systematic  
248 review when a high-quality systematic review based on randomised controlled trials exists. If no  
249 systematic reviews based on randomised controlled trials exist, these are either published trials or  
250 ongoing studies.

251 d This information is reported to find out whether the important patient-oriented outcomes are  
252 reported in the trials not covered by high-quality systematic reviews. This is to help with deciding  
253 whether new randomised controlled trials are necessary on the topic.

254 e The remaining trials reported treatment-related adverse events, composite outcomes and  
255 surrogate markers.

256

257 The complete list of questions in the Delphi process, the proportion of respondents who  
258 considered a research question as very important and the summary scores in each Delphi round is  
259 available in Online Supplement Appendix 4.

## DISCUSSION

This is the first priority setting partnership on non-alcohol related liver and gallbladder disorders. This included a wide range of disease processes and a total of 428 unique research questions that met the scope of this priority setting partnership were identified. All the research questions were considered unanswered as there had been no high quality systematic reviews which indicated that no further research is required, i.e. all the research questions were uncertainties. Consensus that an uncertainty was a very important research priority was reached for six research questions. Four additional research questions with the highest proportion of Delphi panel members ranking the question as highly important were added to constitute the top 10 research priorities.

As evident from the online supplement Appendix 1, longevity of life and health-related quality of life are two major outcomes that appear important to patients, their carers, and healthcare professionals. However, even when there are ongoing trials, it appears that the outcomes in those trials will not address the outcomes listed in eight of the top 10 research questions (Table 2). Therefore, the next step in addressing these uncertainties is the design and conduct of randomised controlled trials. Such randomised controlled trials may involve qualitative studies to determine the design and should compare the treatments that improve the longevity of life and/or health-related quality of life.

It should be noted that uncertainties 'what are the best treatments that cure or delay the progression (worsening) of non-alcohol-related fatty liver disease (NAFLD)?' and 'what are the best treatments that cure or delay the progression (worsening) of non-alcohol related steatohepatitis (NASH)?' are related to each other. Although NAFLD includes NASH, most of the panel members felt that the research questions related to NAFLD and NASH should be kept separate uncertainties. While the same systematic review can cover both the uncertainties, the primary research study designed to address these two questions differ in terms of the setting, the outcomes used, and the

1  
2  
3 284 period of follow-up. Any primary research that tries to answer these two questions in a single  
4  
5 285 randomised controlled trial will be inefficient.

7 286 Similarly, for the uncertainties 'what are the best treatments that cure or delay the  
8  
9  
10 287 progression (worsening) of primary sclerosing cholangitis (PSC)' and 'are there any treatments that  
11  
12 288 reverse the liver damage in primary sclerosing cholangitis (PSC)?', a single randomised controlled  
13  
14 289 trial will be inefficient and the preference of most of the panel members was to keep these  
15  
16 290 uncertainties as separate uncertainties.

18  
19 291 There are several limitations to our priority setting process. The first one is deviation from  
20  
21 292 the original protocol. To select the final top priorities, the initial plan was to arrive at consensus by  
22  
23 293 open small group and large group discussions of patients, carers, and healthcare professionals as  
24  
25 294 suggested by the standard James-Lind Alliance process<sup>8</sup>, which provides an opportunity for a  
26  
27 295 knowledge exchange of viewpoints and experience. However, part of the steering committee with  
28  
29 296 experience in a similar priority setting partnership felt that open discussions resulted in 'loud voices'  
30  
31 297 being given more importance resulting in an unrepresentative list of top priorities. While this can be  
32  
33 298 mitigated by facilitated group discussions by neutral JLA facilitators to ensure that all voices were  
34  
35 299 heard in the discussions, this was considered by the steering committee as an important source of  
36  
37 300 bias based on their prior experience in participating in open discussions. The steering committee  
38  
39 301 therefore decided to follow the Delphi-consensus method which is one of the major consensus  
40  
41 302 methods<sup>10</sup>. The advantages of Delphi-consensus method over open discussions include anonymity of  
42  
43 303 the response and the equal weight given to the opinions of all members<sup>10</sup>. In addition, they are less  
44  
45 304 costly to conduct without any limitation by geographical location compared to other methods of  
46  
47 305 consensus<sup>10</sup> because of the lack of necessity to travel and take time off regular work. However, there  
48  
49 306 is considerable variability in the previous performance of Delphi processes with regards to the  
50  
51 307 number of rounds and the criteria for achieving consensus<sup>16</sup>. Arriving at consensus depends upon  
52  
53 308 people revising their scores based on the other's scores. Our initial plan was to extend the Delphi to  
54  
55 309 four rounds if consensus on 10 top research priorities was not reached in three rounds. However,  
56  
57  
58  
59  
60

1  
2  
3 310 there was minimal change in scores between the rounds for most questions (Online Supplement  
4  
5 311 Appendix 3) and the Delphi process was completed in three rounds. Consensus on a top research  
6  
7 312 priority was achieved for six questions only. However, the proportion of Delphi panel members  
8  
9 313 ranking a question as highly important was greater than 70% for the remaining four questions added  
10  
11 314 to the list of top research priorities. Previous Delphi consensus processes have used various cut-off  
12  
13 315 points for defining consensus: greater than 70% agreement among panel members is well within the  
14  
15 316 definition of consensus used in previous Delphi consensus processes <sup>16</sup>.

18  
19 317 The other major limitation of our priority setting process is the representativeness of the  
20  
21 318 people who completed the survey and took part in the Delphi process. The online survey was shared  
22  
23 319 among clinicians and members of general and disease-specific patient organisations. Most questions  
24  
25 320 resulting from the online survey relate to chronic liver disease (in particular, autoimmune liver  
26  
27 321 diseases), perhaps reflecting the high motivation to support research from those groups. The Delphi  
28  
29 322 panel also had a high representation of people related to chronic liver disease (in particular,  
30  
31 323 autoimmune liver diseases) as patients, carers, or healthcare professionals. Whilst people affected  
32  
33 324 by different liver and gallbladder disorders were actively sought through both general and disease-  
34  
35 325 specific patient support groups and organisations, only a few responded and completed all three  
36  
37 326 rounds of the Delphi process. The potential bias towards prioritising chronic liver diseases is evident  
38  
39 327 as nine of the top 10 research priorities relate to chronic liver diseases (four relate to autoimmune  
40  
41 328 liver diseases, three related to non-alcohol related fatty liver disease, two related to liver  
42  
43 329 transplantation). It was surprising that the uncertainties related to the treatment of chronic viral  
44  
45 330 diseases such as chronic hepatitis B and chronic hepatitis C were not identified within the top 10  
46  
47 331 research priorities. This may be because of the perception by the some of the panel members that  
48  
49 332 the research questions related to the treatment of chronic hepatitis C were answered with the  
50  
51 333 advent of directly acting antivirals (personal communication). The reason for non-prioritisation of  
52  
53 334 chronic hepatitis B is not entirely clear. This may be because chronic hepatitis B may not have been  
54  
55  
56  
57  
58  
59  
60

1  
2  
3 335 considered as important as other chronic liver diseases or under-representation of chronic hepatitis  
4  
5 336 B in the panel.  
6  
7

8 337 Cancer-related questions, childhood-related liver diseases, and other benign disorders did  
9  
10 338 not end up in the top research priorities (except for the treatment of very early hepatocellular  
11  
12 339 carcinoma, which is managed by hepatologists and surgeons) probably for the reasons described  
13  
14  
15 340 above. We recommend that separate prioritisation processes are carried out for people with  
16  
17 341 gallstones, a condition that affects approximately 5% to 25% of the population <sup>17</sup>, for people with  
18  
19 342 primary and secondary liver cancer, and childhood liver disorders where significant uncertainties  
20  
21 343 remain on the effectiveness of different treatments in decreasing mortality and improving health-  
22  
23 344 related quality of life.  
24  
25

26  
27 345 As well as the above limitation, we are aware of the inherent limitations of using solely  
28  
29 346 technology to carry out the Delphi exercise. These are limitations that can potentially lead to bias in  
30  
31 347 any consensus-building method including that of face-to-face consensus methods normally used in a  
32  
33 348 JLA PSP.  
34  
35

36 349 One solution which might address the limitations of this priority setting process and the  
37  
38 350 standard JLA process may be to collect information routinely from patients visiting hospitals using  
39  
40 351 paper forms and conduct online meetings (video conferencing and presentation) before the final  
41  
42 352 round of the Delphi (or the standard face-to-face priority setting workshop used by the JLA. Some  
43  
44 353 JLA PSPs do use methods such as face-to face interviews and group discussions rather than solely  
45  
46 354 online surveys). By collecting information on paper forms and conducting the meetings in hospitals,  
47  
48 355 it is possible to engage with people who do not have access to or are not familiar with computers. It  
49  
50 356 is also possible to engage with people who have concerns regarding data confidentiality with the use  
51  
52 357 of computers or social media by collecting information using paper forms. Ethical and confidentiality  
53  
54 358 issues will need to be considered prior to engaging patients attending hospital in the research  
55  
56 359 prioritisation process.  
57  
58  
59  
60

1  
2  
3 360 Another limitation of our priority setting process is the drop-outs during the Delphi process.  
4  
5 361 While some of the drop-outs may be related to the ability to complete online surveys and use  
6  
7 362 Microsoft Excel, some patient representatives or clinicians may have dropped out because they did  
8  
9 363 not find any research question to be of direct relevance to them. Other reasons include lack of  
10  
11 364 understanding of the conditions, feeling that the process was too complicated, feeling that the  
12  
13 365 process would not work, and the time commitment for the process. This is because of the broad  
14  
15 366 scope of this research prioritisation process and may be overcome by choosing a narrower focus  
16  
17 367 while defining the scope of the prioritisation process, and by better explanation of the disease  
18  
19 368 processes through presentations.

20  
21  
22  
23  
24 369 It should also be recognised that the Delphi panel was constituted of representatives from  
25  
26 370 England, Scotland, and Wales. Therefore, the findings are applicable in only these countries.  
27  
28 371 However, the findings are likely to be applicable throughout the NHS and in other European and  
29  
30 372 Western countries with a similar spectrum of chronic liver diseases and similar treatment options  
31  
32 373 available.

33  
34  
35  
36 374 In summary, there are significant uncertainties in the management of liver and gallbladder  
37  
38 375 disorders. Further high-quality research is necessary to address these uncertainties which may  
39  
40 376 require programmes of basic, translational, clinical, and public health research. For issues with  
41  
42 377 diverse and unproven treatment options, randomised controlled trials may be the only mechanism  
43  
44 378 for identifying the most effective treatment and the treatments that represent good value for  
45  
46 379 money for the NHS. Such randomised controlled trials should assess the effect of different  
47  
48 380 treatments in improving longevity of life and/or health-related quality of life.  
49  
50  
51

## 52 53 381 **ACKNOWLEDGEMENTS**

54  
55  
56  
57 382 We thank Mr Andrew Langford, previous Chief Executive of British Liver Trust, participants in the  
58  
59 383 survey, Ms Caroline Whiting and Ms Beccy Maeso, JLA PSP co-ordinators for their advice on the  
60

1  
2  
3 384 process and comments on the manuscript, and the Delphi panel members who preferred to remain  
4  
5 385 anonymous in contributing to this research prioritisation process.  
6  
7  
8

## 9 386 **FUNDING**

10  
11  
12  
13 387 There was no external funding.  
14  
15  
16

## 17 388 **CONTRIBUTION OF AUTHORS**

18  
19  
20  
21 389 Kurinchi Gurusamy – conceptualisation, healthcare professional and methodological lead of steering  
22  
23 390 committee, Delphi panel member, analysis, author of the manuscript.  
24  
25

26 391 Martine Walmsley – Patients and carers lead of steering committee, Delphi panel member  
27  
28

29 392 Brian Davidson, Claire Frier, Barry Fuller, Angela Madden, Steven Masson, Ivana Safarik, Emmanouil  
30

31 393 Tsochatzis – Steering committee, Delphi panel member, suggested revisions to the manuscript  
32  
33

34 394 Richard Morley – Steering committee, JLA advisor  
35  
36

37 395 Irfan Ahmed, Maxine Cowlin, John Dillon, Graham Ellicott, Ahmed Elsharkawy, Liz Farrington,  
38

39 396 Anthony Glachan, Nagappan Kumar, EJ Milne, Simon Rushbrook, Amanda Smith, Lizzie Stafford,  
40

41 397 Andrew Yeoman – Delphi panel member, suggested revisions to the manuscript  
42  
43  
44

## 45 398 **CONFLICTS OF INTEREST**

46  
47  
48  
49 399 The decisions made by healthcare professionals involved in the research prioritisation process might  
50  
51 400 have been influenced by their professional interests, in addition to their own, or family member's  
52  
53 401 experience of health conditions. Decisions made by patients and carers in the research prioritisation  
54  
55 402 process might have been influenced by their particular experiences, health needs and interests.  
56  
57  
58  
59  
60



## 403 DATA SHARING AGREEMENT

404 All data is available in the manuscript or in the supplementary file.

## 405 FIGURE 1

### 406 Research prioritisation steps

407 The major steps in the research prioritisation are shown in the figure.

408 <sup>a</sup>The protocol was registered with James-Lind Alliance Priority Setting Partnership

409 <sup>b</sup>The final prioritisation was achieved by modified Delphi consensus method.

## 410 REFERENCES

- 411 1. Chalmers I. Confronting therapeutic ignorance. *BMJ* 2008;337:a841. doi:  
412 10.1136/bmj.39555.392627.80 [published Online First: 2008/07/18]
- 413 2. James Lind Alliance Priority Setting Partnerships. About the James Lind Alliance.  
414 <http://www.jlanihracuk/about-the-james-lind-alliance/> (accessed 6th April 2018) 2018
- 415 3. Crowe S, Fenton M, Hall M, et al. Patients', clinicians' and the research communities' priorities for  
416 treatment research: there is an important mismatch. *Research Involvement and Engagement*  
417 2015;1(1):2. doi: 10.1186/s40900-015-0003-x
- 418 4. Tallon D, Chard J, Dieppe P. Relation between agendas of the research community and the  
419 research consumer. *The Lancet*;355(9220):2037-40. doi: 10.1016/S0140-6736(00)02351-5
- 420 5. James Lind Alliance Priority Setting Partnerships. Tinnitus PSP: What's happening to address the  
421 priorities more than 4 years later? [http://www.jlanihracuk/news/tinnitus-psp-whats-](http://www.jlanihracuk/news/tinnitus-psp-whats-happening-to-address-the-priorities-more-than-4-years-later/5299)  
422 [happening-to-address-the-priorities-more-than-4-years-later/5299](http://www.jlanihracuk/news/tinnitus-psp-whats-happening-to-address-the-priorities-more-than-4-years-later/5299) (accessed on 2 December  
423 2018) 2017

- 1  
2  
3 424 6. National Institute for Health Research. Adding value in research 1: Identifying important research  
4  
5 425 topics. <https://www.nihr.ac.uk/about-us/documents/pillar-1-identifying-researchpdf> (accessed  
6  
7 426 on 2 December 2018) 2018
- 8  
9  
10 427 7. James Lind Alliance Priority Setting Partnerships. Alcohol-related liver disease.  
11  
12 428 <http://www.jlanihr.ac.uk/priority-setting-partnerships/alcohol-related-liver-disease/> (accessed  
13  
14 429 6th April 2018) 2018
- 15  
16 430 8. James Lind Alliance Priority Setting Partnerships. JLA guidebook. [http://www.jlanihr.ac.uk/jla-](http://www.jlanihr.ac.uk/jla-guidebook/)  
17  
18 431 [guidebook/](http://www.jlanihr.ac.uk/jla-guidebook/) (accessed 6th April 2018) 2018
- 19  
20  
21 432 9. PSC Support. Welcome to PSC Support, dedicated to helping people affected by primary sclerosing  
22  
23 433 cholangitis. <https://www.pscsupport.org.uk/> (accessed 6th April 2018) 2018
- 24  
25 434 10. Jones J, Hunter D. Consensus methods for medical and health services research. *BMJ*  
26  
27 435 1995;311(7001):376-80.
- 28  
29  
30 436 11. Majumdar A, Roccarina D, Thorburn D, et al. Management of people with early- or very early-  
31  
32 437 stage hepatocellular carcinoma: an attempted network meta-analysis. *The Cochrane*  
33  
34 438 *database of systematic reviews* 2017;3:CD011650. doi: 10.1002/14651858.CD011650.pub2  
35  
36 439 [published Online First: 2017/03/30]
- 37  
38  
39 440 12. Saffioti F, Gurusamy KS, Hawkins N, et al. Pharmacological interventions for primary sclerosing  
40  
41 441 cholangitis: an attempted network meta-analysis. *The Cochrane database of systematic*  
42  
43 442 *reviews* 2017;3:CD011343. doi: 10.1002/14651858.CD011343.pub2 [published Online First:  
44  
45 443 2017/04/19]
- 46  
47  
48 444 13. Lombardi R, Onali S, Thorburn D, et al. Pharmacological interventions for non-alcohol related  
49  
50 445 fatty liver disease (NAFLD): an attempted network meta-analysis. *The Cochrane database of*  
51  
52 446 *systematic reviews* 2017;3:CD011640. doi: 10.1002/14651858.CD011640.pub2 [published  
53  
54 447 Online First: 2017/03/31]
- 55  
56  
57 448 14. Rodriguez-Peralvarez M, Guerrero-Misas M, Thorburn D, et al. Maintenance immunosuppression  
58  
59 449 for adults undergoing liver transplantation: a network meta-analysis. *The Cochrane database*  
60

- 1  
2  
3 450 *of systematic reviews* 2017;3:CD011639. doi: 10.1002/14651858.CD011639.pub2 [published  
4  
5 451 Online First: 2017/04/01]  
6  
7 452 15. Saffioti F, Gurusamy KS, Eusebi LH, et al. Pharmacological interventions for primary biliary  
8  
9  
10 453 cholangitis: an attempted network meta-analysis. *The Cochrane database of systematic*  
11  
12 454 *reviews* 2017;3:CD011648. doi: 10.1002/14651858.CD011648.pub2 [published Online First:  
13  
14 455 2017/03/30]  
15  
16 456 16. Diamond IR, Grant RC, Feldman BM, et al. Defining consensus: a systematic review recommends  
17  
18  
19 457 methodologic criteria for reporting of Delphi studies. *J Clin Epidemiol* 2014;67(4):401-9. doi:  
20  
21 458 10.1016/j.jclinepi.2013.12.002 [published Online First: 2014/03/04]  
22  
23 459 17. Gurusamy KS, Davidson BR. Gallstones. *BMJ* 2014;348:g2669. doi: 10.1136/bmj.g2669  
24  
25  
26  
27 460  
28  
29  
30  
31  
32  
33  
34  
35  
36  
37  
38  
39  
40  
41  
42  
43  
44  
45  
46  
47  
48  
49  
50  
51  
52  
53  
54  
55  
56  
57  
58  
59  
60

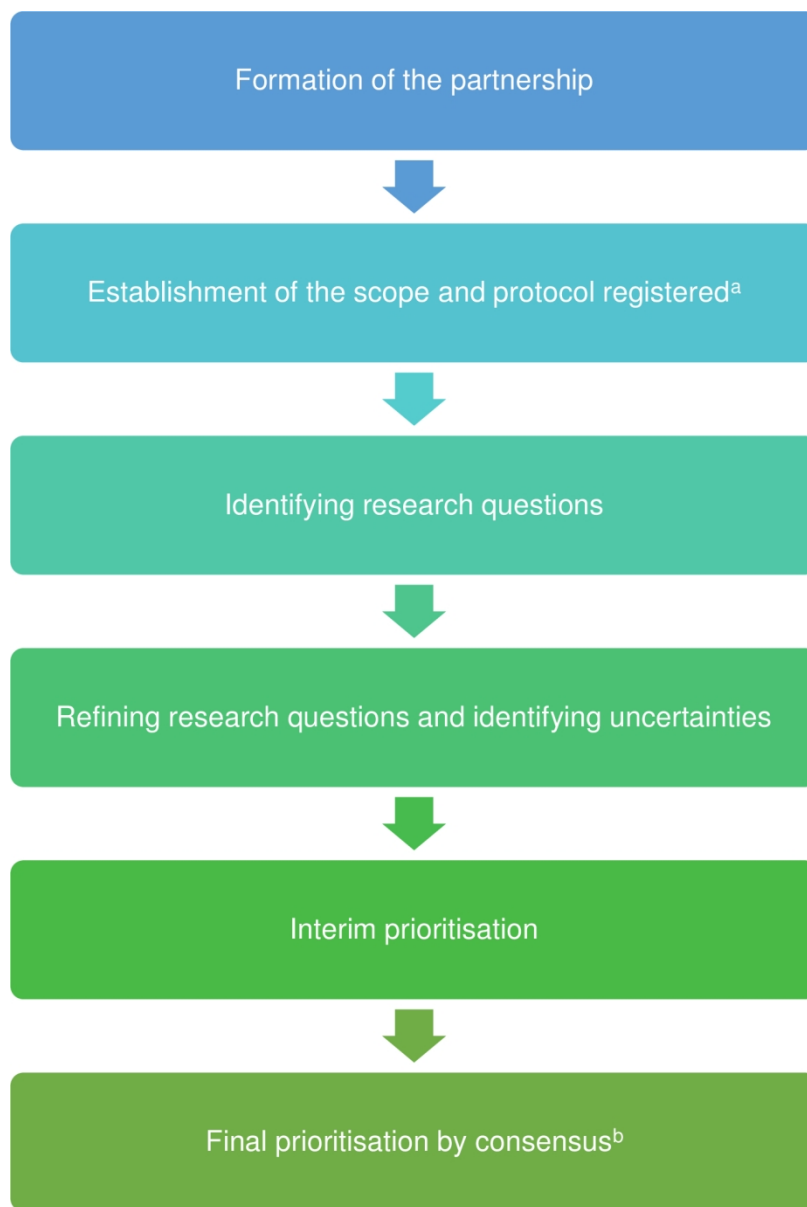

Figure 1: Research prioritisation steps

The major steps in the research prioritisation are shown in the figure.

<sup>a</sup>The protocol was registered with James-Lind Alliance Priority Setting Partnership

<sup>b</sup>The final prioritisation was achieved by modified Delphi consensus method.

119x177mm (300 x 300 DPI)

## Appendix 1 List of all research questions

| Patient/population                               | Intervention                                 | Control         | Outcomes                                                                                                                                                                               |
|--------------------------------------------------|----------------------------------------------|-----------------|----------------------------------------------------------------------------------------------------------------------------------------------------------------------------------------|
| People with obesity                              | Lifestyle: diet                              | No intervention | <ol style="list-style-type: none"> <li>1. Liver transplantation</li> <li>2. Improvement in BMI.</li> <li>3. Improved liver function</li> </ol>                                         |
| People with liver disease                        | Nurse-led care                               | Standard care   | Ability to self-manage                                                                                                                                                                 |
| People with asymptomatic chronic liver disease   | Education of people                          | No intervention | <ol style="list-style-type: none"> <li>1. Improvement in life style.</li> <li>2. Fatty liver disease</li> </ol>                                                                        |
| People with NASH (non-alcoholic steatohepatitis) | Different medical treatments                 | No intervention | <ol style="list-style-type: none"> <li>1. Halting disease progression.</li> <li>2. Reversing disease progression.</li> <li>3. Slowing disease progression.</li> <li>4. Cure</li> </ol> |
| People with primary sclerosing cholangitis       | Treatment for primary sclerosing cholangitis | No intervention | <ol style="list-style-type: none"> <li>1. Mortality</li> <li>2. HRQoL (health-related quality of life)</li> </ol>                                                                      |

1  
2  
3  
4  
5  
6  
7  
8  
9  
10  
11  
12  
13  
14  
15  
16  
17  
18  
19  
20  
21  
22  
23  
24  
25  
26  
27  
28  
29  
30  
31  
32  
33  
34  
35  
36  
37  
38  
39  
40  
41  
42  
43  
44  
45  
46  
47  
48  
49  
50  
51  
52  
53  
54  
55  
56  
57  
58  
59  
60

|                           |                                                                    |                |                                                                                                                                                                                                                                                                                                                                                                                                                      |
|---------------------------|--------------------------------------------------------------------|----------------|----------------------------------------------------------------------------------------------------------------------------------------------------------------------------------------------------------------------------------------------------------------------------------------------------------------------------------------------------------------------------------------------------------------------|
|                           |                                                                    |                | <ol style="list-style-type: none"> <li>3. Fewer symptoms - pain, itching, fatigue</li> <li>4. improved liver function</li> <li>5. Cure</li> <li>6. Time to liver transplantation</li> <li>7. Improvement (no further details)</li> <li>8. Decreased hospital admission</li> <li>9. Disease progression</li> <li>10. Remission from PSC</li> <li>11. Cancer</li> <li>12. Requirement for liver transplant.</li> </ol> |
| People with liver disease | Methods to improve compliance to treatment                         | Not applicable | <ol style="list-style-type: none"> <li>1. HRQoL</li> <li>2. Mortality</li> </ol>                                                                                                                                                                                                                                                                                                                                     |
| General population        | Screening: early identification of people at risk of liver disease | No screening   | <ol style="list-style-type: none"> <li>1. HRQoL</li> <li>2. Mortality</li> </ol>                                                                                                                                                                                                                                                                                                                                     |

|                                                                                                                                                                                                                                                                                                                                                                                      |                                                                     |                       |                                                                                                                                                                                                            |
|--------------------------------------------------------------------------------------------------------------------------------------------------------------------------------------------------------------------------------------------------------------------------------------------------------------------------------------------------------------------------------------|---------------------------------------------------------------------|-----------------------|------------------------------------------------------------------------------------------------------------------------------------------------------------------------------------------------------------|
| <p>1<br/>2<br/>3<br/>4<br/>5<br/>6<br/>7<br/>8<br/>9<br/>10<br/>11<br/>12<br/>13<br/>14<br/>15<br/>16<br/>17<br/>18<br/>19<br/>20<br/>21<br/>22<br/>23<br/>24<br/>25<br/>26<br/>27<br/>28<br/>29</p> <p>People at risk of liver disease</p>                                                                                                                                          | <p>Diagnosis: early identification of people with liver disease</p> | <p>Not applicable</p> | <p>1. HRQoL<br/>2. Mortality<br/>3. Prevention of liver disease<br/>4. Slowing progression of liver disease<br/>5. Reducing requirement for liver transplantation<br/>6. Adverse events of medications</p> |
| <p>30<br/>31<br/>32<br/>33<br/>34<br/>35<br/>36<br/>37<br/>38<br/>39<br/>40<br/>41<br/>42<br/>43<br/>44<br/>45<br/>46<br/>47<br/>48<br/>49<br/>50<br/>51<br/>52<br/>53<br/>54<br/>55<br/>56<br/>57<br/>58<br/>59<br/>60</p> <p>People with primary sclerosing cholangitis and who have had a liver transplant and still have ulcerative colitis even after a sub total colectomy</p> | <p>Symptomatic treatment for primary sclerosing cholangitis</p>     | <p>Not applicable</p> | <p>1. HRQoL.<br/>2. Decrease in symptoms (breathlessness and fatigue).<br/>3. Mortality.<br/>4. Decrease in medication.<br/>5. Cure.<br/>6. Decreased progression of primary sclerosing cholangitis.</p>   |

|                                                       |                                                                                      |                |                                                                                                                                                                                                                                                 |
|-------------------------------------------------------|--------------------------------------------------------------------------------------|----------------|-------------------------------------------------------------------------------------------------------------------------------------------------------------------------------------------------------------------------------------------------|
|                                                       |                                                                                      |                | 7. Improvement in symptoms (unspecified).                                                                                                                                                                                                       |
| People at risk of liver disease (overweight or obese) | Diagnosis: Accurate non-invasive method for diagnosis of chronic liver disease       | Not applicable | <ol style="list-style-type: none"> <li>1. Death</li> <li>2. Need for liver transplant</li> <li>3. Requirement for hospital admission.</li> <li>4. Demonstrating equivalence to biopsy</li> <li>5. Demonstrating good reproducibility</li> </ol> |
| People at risk of liver disease (overweight or obese) | Screening methods to diagnose liver disease (including history and diagnostic tests) | Not applicable | <ol style="list-style-type: none"> <li>1. Proportion of people at risk of liver disease</li> <li>2. Proportion of people at risk who have asymptomatic liver fibrosis</li> <li>3. Early diagnosis and treatment</li> </ol>                      |
| People with polycystic liver disease                  | Treatment for polycystic disease                                                     | Not applicable | <ol style="list-style-type: none"> <li>1. Decrease symptoms</li> <li>2. Increase quality of</li> </ol>                                                                                                                                          |



|                                         |                                             |                       |                                                                                                                                                                                                                                                                                                                                                               |
|-----------------------------------------|---------------------------------------------|-----------------------|---------------------------------------------------------------------------------------------------------------------------------------------------------------------------------------------------------------------------------------------------------------------------------------------------------------------------------------------------------------|
|                                         |                                             |                       | <p>life</p> <p>3. Decrease size of cyst or preventing cysts to enlarge</p> <p>4. Increased longevity</p> <p>5. Requirement for liver transplant.</p>                                                                                                                                                                                                          |
| <p>People with autoimmune hepatitis</p> | <p>Treatments for autoimmune hepatitis.</p> | <p>Not applicable</p> | <p>1. HRQoL (including ability to carry out normal activities, study, work).</p> <p>2. Fatigue.</p> <p>3. Osteoporosis (treatment-related).</p> <p>4. Cataracts (treatment-related).</p> <p>5. Infections (treatment-related).</p> <p>6. Weight gain (treatment-related).</p> <p>7. Treatment related side-effects (unspecified).</p> <p>8. Brittle teeth</p> |

1  
2  
3  
4  
5  
6  
7  
8  
9  
10  
11  
12  
13  
14  
15  
16  
17  
18  
19  
20  
21  
22  
23  
24  
25  
26  
27  
28  
29  
30  
31  
32  
33  
34  
35  
36  
37  
38  
39  
40  
41  
42  
43  
44  
45  
46  
47  
48  
49  
50  
51  
52  
53  
54  
55  
56  
57  
58  
59  
60

|                                         |                                   |                      |                                                                                                                                                                                                                                                                                                                                                                                                                                                      |
|-----------------------------------------|-----------------------------------|----------------------|------------------------------------------------------------------------------------------------------------------------------------------------------------------------------------------------------------------------------------------------------------------------------------------------------------------------------------------------------------------------------------------------------------------------------------------------------|
|                                         |                                   |                      | <p>(treatment-related).</p> <p>9. More effective treatment unspecified.</p> <p>10. Complete recovery (unspecified).</p> <p>11. Mortality.</p> <p>12. Measure feeling well (unspecified)</p> <p>13. Fewer flare ups</p> <p>14. Less joint pain.</p> <p>15. Disability</p> <p>16. Liver damage requiring hospital admission</p> <p>17. Quicker recovery</p> <p>18. More monitoring of patients</p> <p>19. Symptom control.</p> <p>20. Side-effects</p> |
| <p>People with autoimmune hepatitis</p> | <p>Standardised protocol care</p> | <p>Standard care</p> | <p>1. HRQoL.</p> <p>2. Fatigue.</p> <p>3. Osteoporosis</p>                                                                                                                                                                                                                                                                                                                                                                                           |

For peer review only

|                                         |                                                                         |                       |                                                                                                                                                                                                                                                                                                          |
|-----------------------------------------|-------------------------------------------------------------------------|-----------------------|----------------------------------------------------------------------------------------------------------------------------------------------------------------------------------------------------------------------------------------------------------------------------------------------------------|
|                                         |                                                                         |                       | <p>(treatment-related).</p> <p>4. Cataracts</p> <p>(treatment-related).</p> <p>5. Infections</p> <p>(treatment-related).</p> <p>6. Weight gain</p> <p>(treatment-related).</p>                                                                                                                           |
| <p>People with autoimmune hepatitis</p> | <p>Treatment of fatigue/joint pain related to autoimmune hepatitis.</p> | <p>Not applicable</p> | <p>1. HRQoL.</p> <p>2. Fatigue.</p> <p>3. Osteoporosis</p> <p>(treatment-related).</p> <p>4. Cataracts</p> <p>(treatment-related).</p> <p>5. Infections</p> <p>(treatment-related).</p> <p>6. Weight gain</p> <p>(treatment-related).</p> <p>7. Joint pain.</p> <p>8. Symptoms</p> <p>(unspecified).</p> |
| <p>People with autoimmune hepatitis</p> | <p>Nurse-led care</p>                                                   | <p>Standard care</p>  | <p>1. Faster recovery.</p> <p>2. HRQoL.</p> <p>3. Symptoms.</p>                                                                                                                                                                                                                                          |

|                                                                                                                                                                                              |                                  |                                                    |               |                                                                                                                                                                                                                                                                                                                                     |
|----------------------------------------------------------------------------------------------------------------------------------------------------------------------------------------------|----------------------------------|----------------------------------------------------|---------------|-------------------------------------------------------------------------------------------------------------------------------------------------------------------------------------------------------------------------------------------------------------------------------------------------------------------------------------|
| 1<br>2<br>3<br>4<br>5<br>6<br>7<br>8<br>9<br>10<br>11                                                                                                                                        | People with autoimmune hepatitis | Education of healthcare professionals and patients | Standard care | <ol style="list-style-type: none"> <li>1. Faster recovery.</li> <li>2. HRQoL.</li> <li>3. Symptoms.</li> </ol>                                                                                                                                                                                                                      |
| 12<br>13<br>14<br>15<br>16<br>17<br>18<br>19<br>20<br>21<br>22<br>23<br>24<br>25<br>26<br>27<br>28<br>29<br>30<br>31<br>32<br>33<br>34<br>35<br>36<br>37<br>38<br>39<br>40<br>41<br>42<br>43 | People with autoimmune hepatitis | Lifestyle: diet                                    | Standard care | <ol style="list-style-type: none"> <li>1. Treatment related adverse events.</li> <li>2. Requirements for liver transplantation.</li> <li>3. NHS (National Health Service, UK) costs</li> <li>4. HRQoL</li> <li>5. Mortality.</li> <li>6. Free from immunosuppressive therapies.</li> <li>7. Fatigue.</li> <li>8. Weight.</li> </ol> |
| 44<br>45<br>46<br>47<br>48<br>49<br>50<br>51<br>52                                                                                                                                           | People with autoimmune hepatitis | Education of people                                | Standard care | <ol style="list-style-type: none"> <li>Faster reduction in strong medications.</li> <li>Need for liver transplantation.</li> </ol>                                                                                                                                                                                                  |
| 53<br>54<br>55<br>56<br>57<br>58<br>59<br>60                                                                                                                                                 | People with autoimmune hepatitis | Cannabis + standard care                           | Standard care | <ol style="list-style-type: none"> <li>1. Reduction in immunosuppressants.</li> </ol>                                                                                                                                                                                                                                               |

|                                                                                                                                                                                             |                                                                                  |                        |                                                                                                                                                                                                                                                                                                               |
|---------------------------------------------------------------------------------------------------------------------------------------------------------------------------------------------|----------------------------------------------------------------------------------|------------------------|---------------------------------------------------------------------------------------------------------------------------------------------------------------------------------------------------------------------------------------------------------------------------------------------------------------|
|                                                                                                                                                                                             |                                                                                  |                        | <ol style="list-style-type: none"> <li>2. Fatigue.</li> <li>3. Treatment related side effects such as serious infections, anxiety, depression, cancer, physical side effects.</li> </ol>                                                                                                                      |
| <p>General population (&gt; 40 years or &gt;50 years or middle-aged people, particularly overweight/obese and/or have type 2 diabetes and/or a family history of chronic liver disease)</p> | <p>Screening for liver disease by GP using routine blood tests/other methods</p> | <p>Standard care</p>   | <ol style="list-style-type: none"> <li>1. Earlier diagnosis and treatment.</li> <li>2. Preventing liver disease progressing to cirrhosis.</li> <li>3. More cost effective for NHS.</li> <li>4. Preventing the complications of chronic liver disease such as hepatocellular carcinoma and varices.</li> </ol> |
| <p>People with autoimmune hepatitis</p>                                                                                                                                                     | <p>Prednisolone</p>                                                              | <p>No intervention</p> | <ol style="list-style-type: none"> <li>1. Obesity.</li> <li>2. Osteoporosis.</li> <li>3. Insomnia.</li> <li>4. Hypertension.</li> </ol>                                                                                                                                                                       |

|                                                          |                                                                                       |                                                                 |                                                  |                                                |
|----------------------------------------------------------|---------------------------------------------------------------------------------------|-----------------------------------------------------------------|--------------------------------------------------|------------------------------------------------|
| 1<br>2<br>3<br>4<br>5<br>6<br>7<br>8<br>9                | People with genetic markers associated with autoimmune hepatitis.                     | Methods for prophylaxis                                         | No intervention                                  | Prevention of autoimmune hepatitis             |
| 10<br>11<br>12<br>13                                     | People with autoimmune hepatitis                                                      | Lifestyle: optimal physical exercise                            | Not applicable                                   | 1. Weight<br>2. Fatigue                        |
| 14<br>15<br>16<br>17<br>18                               | People with autoimmune hepatitis (stable)                                             | Nurse-led care                                                  | Standard care                                    | 1. Fatigue                                     |
| 19<br>20<br>21<br>22                                     | People with suspected autoimmune hepatitis                                            | Methods to make a quicker diagnosis                             | Not applicable                                   | 1. Earlier diagnosis                           |
| 23<br>24<br>25<br>26<br>27<br>28<br>29                   | People with NASH, diabetes, and gastroparesis                                         | Treatments for breathlessness and pain                          | Not applicable                                   | 1. Breathlessness and pain.                    |
| 30<br>31<br>32<br>33<br>34                               | People with NASH cirrhosis, diabetes, and anaemia                                     | Treatments                                                      | Not applicable                                   | HRQoL                                          |
| 35<br>36<br>37<br>38                                     | People with NASH cirrhosis, diabetes, and anaemia                                     | Education of people                                             | Standard care                                    | Better knowledge                               |
| 39<br>40<br>41                                           | General population                                                                    | Education of people                                             | Standard care                                    | Better knowledge                               |
| 42<br>43<br>44<br>45<br>46<br>47                         | People with NASH cirrhosis, diabetes, and anaemia                                     | Non-pharmacological treatments to decrease pain and depression  | Pharmacological interventions or no intervention | 1. Pain<br>2. Depression                       |
| 48<br>49<br>50<br>51<br>52<br>53<br>54<br>55<br>56<br>57 | People with suspected autoimmune diseases with potential to cause acute liver failure | Diagnosis of autoimmune diseases that cause acute liver failure | Not applicable                                   | Identification of specific autoimmune diseases |

|                                                                                                                                                                                                                                                                                                                                                             |                                                                             |                                                                       |                                                  |                                                                                                                                                                                                                                                                    |
|-------------------------------------------------------------------------------------------------------------------------------------------------------------------------------------------------------------------------------------------------------------------------------------------------------------------------------------------------------------|-----------------------------------------------------------------------------|-----------------------------------------------------------------------|--------------------------------------------------|--------------------------------------------------------------------------------------------------------------------------------------------------------------------------------------------------------------------------------------------------------------------|
| 1<br>2<br>3<br>4<br>5<br>6<br>7<br>8<br>9<br>10<br>11<br>12<br>13<br>14<br>15<br>16<br>17<br>18<br>19<br>20<br>21<br>22<br>23<br>24<br>25<br>26<br>27<br>28<br>29<br>30<br>31<br>32<br>33<br>34<br>35<br>36<br>37<br>38<br>39<br>40<br>41<br>42<br>43<br>44<br>45<br>46<br>47<br>48<br>49<br>50<br>51<br>52<br>53<br>54<br>55<br>56<br>57<br>58<br>59<br>60 | People with autoimmune diseases with potential to cause acute liver failure | Prophylactic treatments                                               | Not applicable                                   | Prevent acute liver failure                                                                                                                                                                                                                                        |
|                                                                                                                                                                                                                                                                                                                                                             | People with primary sclerosing cholangitis                                  | Lifestyle: diet (including alcohol consumption) and physical exercise | Not applicable                                   | <ol style="list-style-type: none"> <li>1. Reduction in symptoms</li> <li>2. Overall health benefits (unspecified)</li> <li>3. Ability to return to useful occupation.</li> <li>4. Reduce medication.</li> <li>5. Reduce need for annual investigations.</li> </ol> |
|                                                                                                                                                                                                                                                                                                                                                             | People with primary sclerosing cholangitis                                  | Azathioprine                                                          | Other interventions                              | Treatment related adverse events                                                                                                                                                                                                                                   |
|                                                                                                                                                                                                                                                                                                                                                             | People with autoimmune hepatitis                                            | Non-pharmacological treatments to treat autoimmune hepatitis          | Pharmacological interventions or no intervention | <ol style="list-style-type: none"> <li>1. Reduction in symptoms</li> <li>2. HRQoL (including the ability to do everyday tasks/ back into education or employment)</li> </ol>                                                                                       |

|                                                                                                                      |                                                                                  |                             |                                            |                                                                                                                                                                                                                                            |
|----------------------------------------------------------------------------------------------------------------------|----------------------------------------------------------------------------------|-----------------------------|--------------------------------------------|--------------------------------------------------------------------------------------------------------------------------------------------------------------------------------------------------------------------------------------------|
| 1<br>2<br>3<br>4<br>5<br>6<br>7<br>8<br>9                                                                            | People with primary sclerosing cholangitis                                       | Itching receptor blockers   | No intervention/<br>other<br>interventions | Reduction in itching                                                                                                                                                                                                                       |
| 10<br>11<br>12<br>13<br>14<br>15<br>16<br>17<br>18<br>19<br>20<br>21<br>22<br>23<br>24<br>25<br>26<br>27<br>28<br>29 | People with primary sclerosing cholangitis with and without Vitamin D deficiency | Vitamin D supplements       | Standard care                              | <ol style="list-style-type: none"> <li>1. Stop the progress of the disease.</li> <li>2. Fewer flare ups of inflammatory bowel disease and primary sclerosing cholangitis.</li> <li>3. Improve HRQoL</li> <li>4. Less depression</li> </ol> |
| 30<br>31<br>32<br>33<br>34<br>35<br>36                                                                               | People with primary sclerosing cholangitis and autoimmune hepatitis              | Ursodeoxycholic acid        | No intervention/<br>other<br>interventions | Reducing symptoms                                                                                                                                                                                                                          |
| 37<br>38<br>39<br>40<br>41<br>42<br>43                                                                               | People at risk of primary sclerosing cholangitis and autoimmune hepatitis        | Prophylactic treatments     | No intervention                            | Prevention of the condition                                                                                                                                                                                                                |
| 44<br>45<br>46<br>47                                                                                                 | People with autoimmune hepatitis                                                 | Non-steroidal interventions | Steroids                                   | Adverse events                                                                                                                                                                                                                             |
| 48<br>49<br>50<br>51<br>52<br>53<br>54<br>55<br>56<br>57<br>58<br>59<br>60                                           | People at risk of autoimmune liver diseases                                      | Prophylactic treatments     | Not applicable                             | Reduction in those getting advanced liver disorders                                                                                                                                                                                        |



|                                                                                                    |                                                            |                                            |                        |                                                                                                                                 |
|----------------------------------------------------------------------------------------------------|------------------------------------------------------------|--------------------------------------------|------------------------|---------------------------------------------------------------------------------------------------------------------------------|
| 1<br>2<br>3<br>4<br>5<br>6<br>7<br>8<br>9<br>10<br>11<br>12<br>13<br>14<br>15<br>16<br>17<br>18    | People with autoimmune liver diseases (20 to 30 years old) | Treatments                                 | Not applicable         | 1. Reduction in those getting advanced liver disorders.<br>2. Stabilisation of disorder.<br>3. Reduction in liver cancer rates. |
| 19<br>20<br>21<br>22<br>23<br>24<br>25                                                             | People with autoimmune liver diseases (> 30 years)         | Screening: Early diagnosis of liver cancer | No screening           | Early diagnosis of liver cancer                                                                                                 |
| 26<br>27<br>28<br>29<br>30<br>31<br>32<br>33<br>34                                                 | People with NASH and stroke                                | Nurse-led care                             | Standard care          | 1. Recovery time<br>2. Amount of recovery that is made                                                                          |
| 35<br>36<br>37<br>38                                                                               | People with haemochromatosis                               | Lifestyle: iron avoidance diet             | Traditional phlebotomy | Reduction in iron levels                                                                                                        |
| 39<br>40<br>41<br>42<br>43                                                                         | People with haemochromatosis                               | Acceleration of phlebotomy                 | Traditional phlebotomy | Reduction in iron levels                                                                                                        |
| 44<br>45<br>46<br>47<br>48<br>49<br>50<br>51<br>52<br>53<br>54<br>55<br>56<br>57<br>58<br>59<br>60 | People with NAFLD                                          | Nurse-led care                             | Standard care          | 1. Faster recovery.<br>2. Symptom relief (unspecified).<br>3. Prevention of more serious complications.<br>4. Patient education |

|                                                       |                                                   |                |                                                                                                                                                                                                                                    |
|-------------------------------------------------------|---------------------------------------------------|----------------|------------------------------------------------------------------------------------------------------------------------------------------------------------------------------------------------------------------------------------|
|                                                       |                                                   |                | <p>on diet and exercise to lose weight.</p> <p>5. Preventing progression into NASH and cirrhosis.</p> <p>6. Reducing symptoms of aching sides, leg weakness, sickness and nausea.</p> <p>7. Prevent heart attacks and strokes.</p> |
| People with NAFLD                                     | Treatments for pain                               | Not applicable | Reducing pain                                                                                                                                                                                                                      |
| People with NAFLD                                     | Treatments for itching                            | Not applicable | Reduction in itching                                                                                                                                                                                                               |
| People at risk of liver disease (overweight or obese) | Education of healthcare professionals about NAFLD | Standard care  | <p>1. Prevention of cirrhosis.</p> <p>2. Prevention of other related liver complications.</p> <p>3. Earlier diagnosis and treatment of liver diseases.</p> <p>4. Increased knowledge.</p>                                          |
| Midwives and healthcare professionals coming into     | Education of healthcare                           | Standard care  | 1. Prevention of cirrhosis.                                                                                                                                                                                                        |

|                                                          |                                    |                     |                                                                                                                                                                                               |
|----------------------------------------------------------|------------------------------------|---------------------|-----------------------------------------------------------------------------------------------------------------------------------------------------------------------------------------------|
| contact with children and young adults                   | professionals about liver disease  |                     | 2. Prevention of other related liver complications.                                                                                                                                           |
| People with chronic hepatitis C                          | Newer treatments                   | Older interventions | 1. Treatment-related complications<br>2. Ability to perform usual activities such as work, study, housework.<br>3. Severe liver damage requiring hospital admission.<br>4. Decreased anxiety. |
| New-borns                                                | Screening test for biliary atresia | No screening        | Earlier diagnosis and treatment                                                                                                                                                               |
| Children who have undergone liver transplantation        | Immunosuppressive regimens         | Not applicable      | Adverse events                                                                                                                                                                                |
| People with liver-related disorders                      | Treatment for itching              | Not applicable      | Reduction or eradication of itching                                                                                                                                                           |
| People with primary biliary cholangitis                  | Education of people                | Standard care       | Knowledge                                                                                                                                                                                     |
| People with positive AMA (antimitochondrial antibody) M2 | Prophylactic treatments            | Not applicable      | 1. Prevention of primary biliary cholangitis.                                                                                                                                                 |

|                             |                                  |               |                                                                                                                                                                    |
|-----------------------------|----------------------------------|---------------|--------------------------------------------------------------------------------------------------------------------------------------------------------------------|
|                             |                                  |               | 2. Reversion to a negative AMA M2 before cirrhosis develops.                                                                                                       |
| People with positive AMA M2 | Standardised protocol care by GP | Standard care | 1. Prevention of primary biliary cholangitis.<br>2. Reversion to a negative AMA M2 before cirrhosis develops.                                                      |
| People with liver disease   | Stem cell therapy                | Standard care | 1. Mortality<br>2. HRQoL (including ability to carry out normal activities including study and work)<br>3. Prolonging periods of remission<br>4. Reducing symptoms |
| People with liver disease   | Bio-artificial livers            | Standard care | 1. Mortality<br>2. HRQoL (including ability to carry out normal activities                                                                                         |

|                                                                                |                                       |                                            |                                                                                                                 |
|--------------------------------------------------------------------------------|---------------------------------------|--------------------------------------------|-----------------------------------------------------------------------------------------------------------------|
|                                                                                |                                       |                                            | including study and work)                                                                                       |
| People with autoimmune hepatitis                                               | Targeted therapy against autoimmunity | Standard care                              | 1. Mortality<br>2. HRQoL (including ability to carry out normal activities including study and work)            |
| People with primary biliary cholangitis not responding to ursodeoxycholic acid | Different treatments                  | Not applicable                             | 1. Cure<br>2. Slowing of disease<br>3. Improved quality of life with respect to fatigue.                        |
| People with primary biliary cholangitis                                        | Antiviral treatment                   | No intervention/<br>other<br>interventions | 1. Improvement in health (unspecified)<br>2. Mortality                                                          |
| People with primary biliary cholangitis                                        | Treatment for itching and fatigue     | Not applicable                             | 1. HRQoL.<br>2. Anxiety.<br>3. Itching.<br>4. Fatigue.<br>5. Cure<br>6. Slowing of disease<br>7. Symptom relief |
| People with primary biliary cholangitis                                        | Greater patient involvement           | Standard care                              | 1. HRQoL.<br>2. Anxiety.                                                                                        |

|                                                                                  |                                                                               |                                                                                                                          |                                      |                                                                                  |
|----------------------------------------------------------------------------------|-------------------------------------------------------------------------------|--------------------------------------------------------------------------------------------------------------------------|--------------------------------------|----------------------------------------------------------------------------------|
| 1<br>2<br>3<br>4<br>5<br>6<br>7<br>8<br>9<br>10<br>11<br>12<br>13                | People with liver and gallbladder disorders                                   | Nurse-led care                                                                                                           | Standard care                        | 1. Symptoms.<br>2. Pain relief.<br>3. Quicker investigative measures.            |
| 14<br>15<br>16<br>17<br>18<br>19<br>20<br>21<br>22<br>23<br>24<br>25<br>26<br>27 | People with pain after cholecystectomy (especially elderly and living alone)  | Hospital based investigations to find the cause of pain, treatment of the cause of pain and discharged after pain relief | Symptomatic outpatient intervention  | Pain relief                                                                      |
| 28<br>29<br>30<br>31<br>32<br>33<br>34                                           | People with chronic hepatitis C                                               | Ribavirin                                                                                                                | No intervention/ other interventions | Osteoporosis                                                                     |
| 35<br>36<br>37<br>38<br>39<br>40                                                 | People with chronic hepatitis C taking ribavirin                              | Prophylactic treatments for osteoporosis                                                                                 | No prophylactic intervention         | Osteoporosis                                                                     |
| 41<br>42<br>43<br>44<br>45<br>46<br>47<br>48<br>49<br>50<br>51<br>52             | Healthcare professionals dealing with people with primary biliary cholangitis | Education of healthcare professionals about childhood liver disorders                                                    | Standard care                        | 1. Knowledge<br>2. Better treatment of patients with primary biliary cholangitis |
| 53<br>54<br>55<br>56<br>57<br>58<br>59<br>60                                     | People with liver disease                                                     | Education of people                                                                                                      | Standard care                        | 1. Patient knowledge.<br>2. Visits to the                                        |

|                                                        |                                                |                                            |                                                                                               |
|--------------------------------------------------------|------------------------------------------------|--------------------------------------------|-----------------------------------------------------------------------------------------------|
|                                                        |                                                |                                            | hospital.<br>3. More patient responsibility                                                   |
| People with symptomatic primary sclerosing cholangitis | Different treatments                           | Not applicable                             | 1. Cure of disease.<br>2. Delays progression of disease.                                      |
| People with primary sclerosing cholangitis             | Intervention to reverse liver damage           | Not applicable                             | 1. Mortality.<br>2. HRQoL.<br>3. Requirement for liver transplantation.                       |
| People with primary sclerosing cholangitis             | Intervention to treat fatigue                  | Not applicable                             | 1. HRQoL.<br>2. Fatigue.                                                                      |
| People with primary sclerosing cholangitis             | Intervention to treat itching                  | Not applicable                             | 1. HRQoL.<br>2. Itching.                                                                      |
| People with primary sclerosing cholangitis             | Specialist interest doctor                     | Standard care                              | 1. Mortality.<br>2. HRQoL.<br>3. Requirement for liver transplantation.<br>4. Symptom relief. |
| People at risk of oesophageal varices                  | Non-invasive assessment of oesophageal varices | Invasive assessment of oesophageal varices | Reduce bleeding oesophageal varices                                                           |

|                                                                                                                                                                                                                                                                                                                                                             |                                                                                                         |                                                                                                                                    |                        |                                                                                                                                                                                                                                      |
|-------------------------------------------------------------------------------------------------------------------------------------------------------------------------------------------------------------------------------------------------------------------------------------------------------------------------------------------------------------|---------------------------------------------------------------------------------------------------------|------------------------------------------------------------------------------------------------------------------------------------|------------------------|--------------------------------------------------------------------------------------------------------------------------------------------------------------------------------------------------------------------------------------|
| 1<br>2<br>3<br>4<br>5<br>6<br>7<br>8<br>9<br>10<br>11<br>12<br>13<br>14<br>15<br>16<br>17<br>18<br>19<br>20<br>21<br>22<br>23<br>24<br>25<br>26<br>27<br>28<br>29<br>30<br>31<br>32<br>33<br>34<br>35<br>36<br>37<br>38<br>39<br>40<br>41<br>42<br>43<br>44<br>45<br>46<br>47<br>48<br>49<br>50<br>51<br>52<br>53<br>54<br>55<br>56<br>57<br>58<br>59<br>60 | <p>People at risk of chronic liver disease</p>                                                          | <p>Alternative to biopsy for assessment of cirrhosis</p>                                                                           | <p>Liver biopsy</p>    | <p>Assessment of whole liver</p>                                                                                                                                                                                                     |
|                                                                                                                                                                                                                                                                                                                                                             | <p>People at risk of primary sclerosing cholangitis (PSC)</p>                                           | <p>Early diagnosis of primary sclerosing cholangitis<br/>Alternate to liver biopsy</p>                                             | <p>Not applicable</p>  | <p>Not stated</p>                                                                                                                                                                                                                    |
|                                                                                                                                                                                                                                                                                                                                                             | <p>People with primary sclerosing cholangitis with normal or relatively normal liver function tests</p> | <p>Alternative to UKELD (United Kingdom Model for End-Stage Liver Disease) scores for prioritisation for liver transplantation</p> | <p>UKELD</p>           | <p>1. More accurate assessment of transplant need for transplant amongst PSC patients.<br/>2. Reduction in numbers of 'low score' PSC patients becoming too ill for transplant, or not being offered a transplant once 'listed'.</p> |
|                                                                                                                                                                                                                                                                                                                                                             | <p>People with positive AMA M2 with normal liver function tests</p>                                     | <p>Ursodeoxycholic acid</p>                                                                                                        | <p>No intervention</p> | <p>Slowing progression of primary biliary cholangitis</p>                                                                                                                                                                            |



|                                                                                                                                                                                                                                                                                                                                                             |                                                       |                                                                     |                |                                                                                            |
|-------------------------------------------------------------------------------------------------------------------------------------------------------------------------------------------------------------------------------------------------------------------------------------------------------------------------------------------------------------|-------------------------------------------------------|---------------------------------------------------------------------|----------------|--------------------------------------------------------------------------------------------|
| 1<br>2<br>3<br>4<br>5<br>6<br>7<br>8<br>9<br>10<br>11<br>12<br>13<br>14<br>15<br>16<br>17<br>18<br>19<br>20<br>21<br>22<br>23<br>24<br>25<br>26<br>27<br>28<br>29<br>30<br>31<br>32<br>33<br>34<br>35<br>36<br>37<br>38<br>39<br>40<br>41<br>42<br>43<br>44<br>45<br>46<br>47<br>48<br>49<br>50<br>51<br>52<br>53<br>54<br>55<br>56<br>57<br>58<br>59<br>60 | People with suspected primary sclerosing cholangitis  | Nurse-led care                                                      | Standard care  | Earlier diagnosis and treatment                                                            |
|                                                                                                                                                                                                                                                                                                                                                             | People with liver failure of unknown reason           | Investigations to find the cause of liver failure of unknown origin | Not applicable | More knowledge.                                                                            |
|                                                                                                                                                                                                                                                                                                                                                             | People with Gilbert's syndrome                        | Treatment of fatigue related to Gilbert's syndrome                  | Not applicable | 1. HRQoL.<br>2. Chronic fatigue.<br>3. Depression                                          |
|                                                                                                                                                                                                                                                                                                                                                             | People with NAFLD (non-alcoholic fatty liver disease) | Breathing exercises                                                 | Standard care  | 1. Faster recovery.<br>2. Symptom relief<br>3. Prevention of more serious complications    |
|                                                                                                                                                                                                                                                                                                                                                             | People with NASH cirrhosis                            | Treatment of symptoms                                               | Not applicable | Improvement of symptoms                                                                    |
|                                                                                                                                                                                                                                                                                                                                                             | People at risk of liver disease                       | Screening for autoimmune diseases                                   | No screening   | Earlier diagnosis and treatment                                                            |
|                                                                                                                                                                                                                                                                                                                                                             | People with autoimmune hepatitis                      | Treatment of symptoms                                               | Not applicable | 1. Measure feeling well (unspecified).<br>2. Fatigue having energy.<br>3. Fewer flare ups. |

|                                  |                                                            |                                      |                                                                                                                                     |
|----------------------------------|------------------------------------------------------------|--------------------------------------|-------------------------------------------------------------------------------------------------------------------------------------|
|                                  |                                                            |                                      | 4. Less joint pain.<br>5. Disability.                                                                                               |
| People with autoimmune hepatitis | Methods to decrease stress                                 | Not applicable                       | 1. Measure feeling well (unspecified).<br>2. Fatigue having energy.<br>3. Fewer flare ups.<br>4. Less joint pain.<br>5. Disability. |
| People with liver disease        | Counselling for tremors and confusion                      | No counselling                       | Coping with symptoms                                                                                                                |
| People with NAFLD                | Staging of liver disease                                   | Not applicable                       | 1. Mortality.<br>2. Reversal of liver damage                                                                                        |
| People with NAFLD                | Metformin                                                  | No intervention                      | 1. Mortality.<br>2. Reversal of liver damage                                                                                        |
| People with NAFLD                | Standardised protocol for diagnosis and treatment of NAFLD | Standard care                        | 1. Mortality.<br>2. Reversal of liver damage                                                                                        |
| People with osteoarthritis       | Anti-inflammatory drugs                                    | Other interventions                  | Cirrhosis                                                                                                                           |
| People with diabetes             | Adequate control of diabetes                               | Lack of adequate control of diabetes | 1. NASH.<br>2. Cirrhosis.                                                                                                           |

|                                                                            |                                  |                                                                     |                |                                                                                              |
|----------------------------------------------------------------------------|----------------------------------|---------------------------------------------------------------------|----------------|----------------------------------------------------------------------------------------------|
| 1<br>2<br>3<br>4<br>5<br>6<br>7                                            | People at risk of NAFLD          | Screening: Early identification of causes                           | Standard care  | Prevention of liver disease                                                                  |
| 8<br>9<br>10<br>11<br>12<br>13<br>14<br>15<br>16<br>17<br>18               | People with NAFLD                | Treatments                                                          | Not applicable | 1. Cure<br>2. Prevention of liver disease<br>3. Disease progression<br>4. HRQoL              |
| 19<br>20<br>21<br>22<br>23<br>24<br>25<br>26<br>27<br>28<br>29<br>30<br>31 | People with upper abdominal pain | Screening: Early scan with ultrasound, blood tests, and urine tests | Standard care  | 1. Early identification of liver and gallbladder diseases<br>2. Appropriate advice/treatment |
| 32<br>33<br>34<br>35<br>36                                                 | People with NAFLD                | Lifestyle: diet and exercise                                        | Standard care  | 1. HRQoL                                                                                     |
| 37<br>38<br>39<br>40                                                       | People with NAFLD                | Specialist interest doctor                                          | Standard care  | 1. HRQoL                                                                                     |
| 41<br>42<br>43<br>44<br>45                                                 | People at risk of liver disease  | Prophylactic interventions                                          | Not applicable | 1. Prevention of liver disease                                                               |
| 46<br>47<br>48<br>49<br>50<br>51                                           | People at risk of NAFLD          | Prophylactic treatments                                             | Not applicable | 1. Prevention of NAFLD<br>2. Decrease NAFLD                                                  |
| 52<br>53<br>54<br>55<br>56<br>57<br>58<br>59<br>60                         | People with NASH fibrosis        | Lifestyle: exercise                                                 | Standard care  | None stated                                                                                  |

|                                                                                                                                                                                                                                                                                                      |                                                                                                                                 |                       |                                                                                                                                                                                                                                                                             |
|------------------------------------------------------------------------------------------------------------------------------------------------------------------------------------------------------------------------------------------------------------------------------------------------------|---------------------------------------------------------------------------------------------------------------------------------|-----------------------|-----------------------------------------------------------------------------------------------------------------------------------------------------------------------------------------------------------------------------------------------------------------------------|
| <p>1<br/>2<br/>3<br/>4<br/>5<br/>6<br/>7<br/>8<br/>9<br/>10<br/>11<br/>12<br/>13<br/>14<br/>15<br/>16<br/>17<br/>18<br/>19<br/>20<br/>21<br/>22<br/>23<br/>24<br/>25<br/>26<br/>27<br/>28<br/>29<br/>30<br/>31<br/>32<br/>33<br/>34<br/>35<br/>36</p> <p>People with cryptogenic liver cirrhosis</p> | <p>Investigations to find the cause of cryptogenic cirrhosis</p>                                                                | <p>Not applicable</p> | <p>1. Reduction in liver disease diagnosis of the percentage regarded as cryptogenic.</p> <p>2. Establishment of relevant treatment pathways.</p> <p>3. Reduction in numbers of liver transplant required by earlier intervention using non-invasive treatment regimes.</p> |
| <p>37<br/>38<br/>39<br/>40<br/>41<br/>42<br/>43<br/>44<br/>45<br/>46<br/>47<br/>48<br/>49<br/>50<br/>51<br/>52<br/>53<br/>54<br/>55<br/>56<br/>57<br/>58<br/>59<br/>60</p> <p>People with cirrhosis</p>                                                                                              | <p>Community-led psychological support (on lifestyle: diet and exercise, stress, work-life balance, and general well-being)</p> | <p>Standard care</p>  | <p>1. Reduction of symptoms such as nausea, fatigue.</p> <p>2. Improved nutrition and healthier weights.</p> <p>3. Improved HRQoL</p> <p>4. Improved sense of wellbeing</p> <p>5. Successful work</p>                                                                       |

|                                  |                                        |               |                                                                                                                                                                      |
|----------------------------------|----------------------------------------|---------------|----------------------------------------------------------------------------------------------------------------------------------------------------------------------|
|                                  |                                        |               | <p>and job retention</p> <p>6. Good sense of self determination/empowerment and motivation</p> <p>7. Improved clinical markers (unspecified)</p>                     |
| Newborns                         | Screening for metabolic liver diseases | No screening  | <p>1. Early treatment for people with metabolic liver disease (including dietary advice)</p> <p>2. Mortality.</p> <p>3. HRQoL.</p> <p>4. Prevent type 2 diabetes</p> |
| People with autoimmune hepatitis | Telephone-based care                   | Standard care | <p>1. Reduction in time spent in outpatients</p> <p>2. Less spent on car-parking at hospitals</p>                                                                    |
| People with NASH and diabetes    | Liver transplantation                  | Standard care | <p>1. Mortality</p>                                                                                                                                                  |

|                                                                                                                                                                                                                                                                                                                                                             |                                                           |                                                     |               |                                                                                                |
|-------------------------------------------------------------------------------------------------------------------------------------------------------------------------------------------------------------------------------------------------------------------------------------------------------------------------------------------------------------|-----------------------------------------------------------|-----------------------------------------------------|---------------|------------------------------------------------------------------------------------------------|
| 1<br>2<br>3<br>4<br>5<br>6<br>7<br>8<br>9<br>10<br>11<br>12<br>13<br>14<br>15<br>16<br>17<br>18<br>19<br>20<br>21<br>22<br>23<br>24<br>25<br>26<br>27<br>28<br>29<br>30<br>31<br>32<br>33<br>34<br>35<br>36<br>37<br>38<br>39<br>40<br>41<br>42<br>43<br>44<br>45<br>46<br>47<br>48<br>49<br>50<br>51<br>52<br>53<br>54<br>55<br>56<br>57<br>58<br>59<br>60 | People with primary biliary cholangitis (newly diagnosed) | Adequate drinking water                             | Standard care | 1. HRQoL.<br>2. Liver function tests.                                                          |
|                                                                                                                                                                                                                                                                                                                                                             | People with primary sclerosing cholangitis                | Treatment targeted against deformation of bile duct | Standard care | 1. Time to end-stage liver disease.                                                            |
|                                                                                                                                                                                                                                                                                                                                                             | People with bile duct cancer                              | Treatment targeted against deformation of bile duct | Standard care | Not stated                                                                                     |
|                                                                                                                                                                                                                                                                                                                                                             | People with gallbladder sludge with digestive symptoms    | Avoiding surgery                                    | Standard care | 1. Symptom relief                                                                              |
|                                                                                                                                                                                                                                                                                                                                                             | People with NAFLD                                         | Education of healthcare professionals               | Standard care | 1. Greater awareness of conditions.<br>2. Preventative measures.<br>3. Greater knowledge base. |
|                                                                                                                                                                                                                                                                                                                                                             | People with NAFLD                                         | Education of general public                         | Standard care | 1. Greater awareness of conditions.<br>2. Preventative measures.<br>3. Greater knowledge base. |

|                                                                                                    |                                                                        |                                                                        |                       |                                                                                                                                                                                       |
|----------------------------------------------------------------------------------------------------|------------------------------------------------------------------------|------------------------------------------------------------------------|-----------------------|---------------------------------------------------------------------------------------------------------------------------------------------------------------------------------------|
| 1<br>2<br>3<br>4<br>5<br>6<br>7<br>8<br>9<br>10<br>11                                              | People with NAFLD                                                      | Methods to make an accurate diagnosis (including liver function tests) | Not applicable        | Not stated                                                                                                                                                                            |
| 12<br>13<br>14<br>15<br>16                                                                         | People with NAFLD (overweight)                                         | Interventions to lose weight                                           | Not applicable        | Weight loss                                                                                                                                                                           |
| 17<br>18<br>19<br>20                                                                               | People with liver disease (newly diagnosed)                            | Mental health support                                                  | Not applicable        | Mental health                                                                                                                                                                         |
| 21<br>22<br>23<br>24<br>25<br>26<br>27                                                             | Children with multiple autoimmune disorders related to liver           | Genetic testing of telomere lengths                                    | Other tests/ no tests | Not stated                                                                                                                                                                            |
| 28<br>29<br>30<br>31<br>32<br>33<br>34<br>35<br>36                                                 | Children with multiple autoimmune disorders related to liver           | Stem cell therapy                                                      | Standard care         | Reduction in all conditions with only one drug with little side effects                                                                                                               |
| 37<br>38<br>39<br>40<br>41<br>42<br>43                                                             | People with primary biliary cholangitis (especially younger age group) | Treatments based on tools for predicting prognosis                     | Standard care         | Better care for people with high risk of progression                                                                                                                                  |
| 44<br>45<br>46<br>47<br>48<br>49<br>50<br>51<br>52<br>53<br>54<br>55<br>56<br>57<br>58<br>59<br>60 | People with chronic hepatitis C                                        | Lifestyle: diet                                                        | Standard care         | <ol style="list-style-type: none"> <li>1. Improvement in overall health.</li> <li>2. Decrease in liver damage requiring hospital admission.</li> <li>3. Patient knowledge.</li> </ol> |

|                                                                              |                                                           |                      |                                                                                                                                                                                                                                                                |
|------------------------------------------------------------------------------|-----------------------------------------------------------|----------------------|----------------------------------------------------------------------------------------------------------------------------------------------------------------------------------------------------------------------------------------------------------------|
|                                                                              |                                                           |                      | <p>4. Healthcare professional knowledge.</p> <p>5. Fewer treatment-related complications.</p> <p>6. Decreasing pain and discomfort.</p> <p>7. Clear guidelines for successful dietary needs.</p>                                                               |
| <p>Healthcare professionals dealing with people with chronic hepatitis C</p> | <p>Education of healthcare professionals (about diet)</p> | <p>Standard care</p> | <p>1. Improvement in overall health.</p> <p>2. Decrease in liver damage requiring hospital admission.</p> <p>3. Patient knowledge.</p> <p>4. Healthcare professional knowledge.</p> <p>5. Fewer treatment-related complications.</p> <p>6. Decreasing pain</p> |

For peer review only



|                                                                  |                                                                                                                            |                      |                                                                                                                                                                                                                                                 |
|------------------------------------------------------------------|----------------------------------------------------------------------------------------------------------------------------|----------------------|-------------------------------------------------------------------------------------------------------------------------------------------------------------------------------------------------------------------------------------------------|
|                                                                  |                                                                                                                            |                      | <p>and discomfort.</p> <p>7. Clear guidelines for successful dietary needs.</p>                                                                                                                                                                 |
| <p>Healthcare professionals dealing with people with NAFLD</p>   | <p>Education of healthcare professionals (around support to patients on weight control, diet, exercise and life style)</p> | <p>Standard care</p> | <ol style="list-style-type: none"> <li>1. Preventing progression into NASH and cirrhosis.</li> <li>2. Reducing symptoms of aching sides, leg weakness, sickness and nausea.</li> <li>3. Prevent heart attacks and strokes.</li> </ol>           |
| <p>Family members of people with primary biliary cholangitis</p> | <p>Screening of family members for primary biliary cholangitis</p>                                                         | <p>No screening</p>  | <ol style="list-style-type: none"> <li>1. Establishing the genetic link for primary biliary cholangitis.</li> <li>2. Earlier identification of primary biliary cholangitis who may have PBC or be at risk.</li> <li>3. Cost-savings.</li> </ol> |

|                                                                                                                      |                                                                    |                                                                                                                                                                     |                |                                                                                                                                                                            |
|----------------------------------------------------------------------------------------------------------------------|--------------------------------------------------------------------|---------------------------------------------------------------------------------------------------------------------------------------------------------------------|----------------|----------------------------------------------------------------------------------------------------------------------------------------------------------------------------|
| 1<br>2<br>3<br>4<br>5<br>6<br>7<br>8<br>9                                                                            | People with positive AMA<br>M2 with normal liver<br>function tests | Screening for cirrhosis<br>using biopsy                                                                                                                             | No screening   | Accurate diagnosis of<br>primary biliary<br>cholangitis.                                                                                                                   |
| 10<br>11<br>12<br>13<br>14<br>15<br>16<br>17<br>18<br>19<br>20<br>21<br>22<br>23<br>24<br>25<br>26<br>27             | People with primary biliary<br>cholangitis                         | Screening for other<br>autoimmune<br>conditions associated<br>with primary biliary<br>cholangitis and<br>complications related<br>to primary biliary<br>cholangitis | No screening   | 1. HRQoL.<br>2. Costs.                                                                                                                                                     |
| 28<br>29<br>30<br>31                                                                                                 | People with autoimmune<br>liver disease                            | Treatment of fatigue<br>and others symptoms                                                                                                                         | Not applicable | Remission                                                                                                                                                                  |
| 32<br>33<br>34<br>35<br>36<br>37<br>38<br>39<br>40                                                                   | People with primary<br>sclerosing cholangitis                      | Standardised protocol<br>for follow-up of<br>patients with primary<br>sclerosing cholangitis                                                                        | Standard care  | 1. Reduce need for<br>annual<br>investigations.<br>2. Costs.                                                                                                               |
| 41<br>42<br>43<br>44<br>45<br>46<br>47<br>48<br>49<br>50<br>51<br>52<br>53<br>54<br>55<br>56<br>57<br>58<br>59<br>60 | People with other<br>autoimmune disease                            | Screening for liver<br>disease                                                                                                                                      | No screening   | 1. Decreasing risk of<br>severe liver damage<br>and admission to<br>hospital<br>2. Reducing the need<br>for liver transplants<br>3. Decreasing the risk<br>of liver cancer |

|                                                |                                                                 |                                                                                                                  |                                                                                                                              |
|------------------------------------------------|-----------------------------------------------------------------|------------------------------------------------------------------------------------------------------------------|------------------------------------------------------------------------------------------------------------------------------|
|                                                |                                                                 |                                                                                                                  | <p>4. Mortality</p> <p>5. HRQoL</p>                                                                                          |
| <p>People with NAFLD</p>                       | <p>Pathway for managing end of life care</p>                    | <p>Standard care</p>                                                                                             | <p>1. Patient and carer satisfaction</p> <p>2. Patient HRQoL</p> <p>3. Symptom relief.</p>                                   |
| <p>People with decompensated liver disease</p> | <p>Lifestyle: nutritional treatment</p>                         | <p>Not applicable</p>                                                                                            | <p>1. Improved survival.</p> <p>2. Reduced symptoms.</p> <p>3. Improved nutritional status.</p> <p>4. Improved Strength.</p> |
| <p>People with decompensated liver disease</p> | <p>Measuring energy requirements with indirect calorimeters</p> | <p>Current UK guidance on requirements (Parenteral &amp; Enteral Nutrition Group) (high energy requirements)</p> | <p>1. Improved survival.</p> <p>2. Reduced symptoms.</p> <p>3. Improved nutritional status.</p> <p>4. Improved Strength.</p> |
| <p>People with hepatic encephalopathy</p>      | <p>Branch chain amino acids</p>                                 | <p>Standard care</p>                                                                                             | <p>1. Improved survival.</p> <p>2. Reduced symptoms.</p> <p>3. Improved</p>                                                  |

|                                                             |                                                                                                 |                             |                                                                                                           |
|-------------------------------------------------------------|-------------------------------------------------------------------------------------------------|-----------------------------|-----------------------------------------------------------------------------------------------------------|
|                                                             |                                                                                                 |                             | nutritional status.<br>4. Improved Strength.                                                              |
| People with decompensated liver disease with muscle wasting | Branch chain amino acids                                                                        | Standard care               | 1. Improved survival.<br>2. Reduced symptoms.<br>3. Improved nutritional status.<br>4. Improved Strength. |
| People with decompensated liver disease with muscle wasting | Lifestyle: exercise                                                                             | Standard care               | 1. Improved survival.<br>2. Reduced symptoms.<br>3. Improved nutritional status.<br>4. Improved Strength. |
| People with decompensated liver disease                     | Standardised nutritional assessment of patients and outcomes in nutritional intervention trials | Non-standardised assessment | 1. Improved survival.<br>2. Reduced symptoms.<br>3. Improved nutritional status.<br>4. Improved Strength. |

|                                                             |                                                                                                           |                                      |                                                                                                                          |
|-------------------------------------------------------------|-----------------------------------------------------------------------------------------------------------|--------------------------------------|--------------------------------------------------------------------------------------------------------------------------|
|                                                             |                                                                                                           |                                      | 5. Better conduct of future trials.                                                                                      |
| People with NAFLD                                           | Methods to increase self care                                                                             | Not applicable                       | Reducing symptoms                                                                                                        |
| People with NAFLD                                           | Methods to decrease shortness of breath                                                                   | Not applicable                       | Reducing symptoms                                                                                                        |
| People with liver disease                                   | Interventions to decrease fatigue                                                                         | Not applicable                       | Fatigue                                                                                                                  |
| Healthcare professionals dealing with people with cirrhosis | Education of healthcare professionals about cirrhosis (complications and benefits and harms of treatment) | Standard care                        | Better advice to patients by health professionals regarding complications and benefits and harms of different treatments |
| People with primary biliary cholangitis                     | Ursodeoxycholic acid (including optimal dose)                                                             | No intervention/ other interventions | 1. Liver function tests.<br>2. Minimal effective dose of ursodeoxycholic acid.<br>3. Good sleep.                         |
| People with liver cancer and ascites                        | Different interventions                                                                                   | Not applicable                       | HRQoL                                                                                                                    |

|                                                                                        |                                                |                                    |                         |                                                                                 |
|----------------------------------------------------------------------------------------|------------------------------------------------|------------------------------------|-------------------------|---------------------------------------------------------------------------------|
| 1<br>2<br>3<br>4<br>5<br>6<br>7<br>8<br>9<br>10<br>11                                  | People with primary sclerosing cholangitis     | Screening for cancer               | No screening            | 1. Benefits<br>2. Earlier diagnosis of bile duct cancer<br>3. Mortality         |
| 12<br>13<br>14<br>15<br>16<br>17<br>18                                                 | People with primary or metastatic liver cancer | Nurse-led care (follow-up clinic)  | Doctor-led follow-up    | 1. Patient satisfaction<br>2. Timely surveillance                               |
| 19<br>20<br>21<br>22                                                                   | People with cirrhosis                          | Life-style: nutritional advice     | Not applicable          | 1. Fatigue<br>2. Muscle wasting                                                 |
| 23<br>24<br>25<br>26<br>27                                                             | People with polycystic liver disease           | Surgery                            | Non-surgical management | 1. Recurrence<br>2. HRQoL                                                       |
| 28<br>29<br>30<br>31<br>32<br>33<br>34                                                 | People with gallstones                         | Avoiding surgery                   | Surgery                 | 1. Requirement for surgery<br>2. Costs to NHS                                   |
| 35<br>36<br>37<br>38<br>39<br>40<br>41<br>42<br>43<br>44<br>45                         | People at risk of NASH                         | Nurse-led care                     | No intervention         | 1. Early diagnosis of NASH.<br>2. Successful treatment of NASH.<br>3. Mortality |
| 46<br>47<br>48<br>49<br>50<br>51<br>52<br>53<br>54<br>55<br>56<br>57<br>58<br>59<br>60 | People at risk of NASH                         | Screening for NASH using Fibroscan | No intervention         | 1. Early diagnosis of NASH.<br>2. Successful treatment of NASH.<br>3. Mortality |

|                                                                                                                                                                                                    |                                                            |                        |                                                                                                                                                                             |
|----------------------------------------------------------------------------------------------------------------------------------------------------------------------------------------------------|------------------------------------------------------------|------------------------|-----------------------------------------------------------------------------------------------------------------------------------------------------------------------------|
| <p>1<br/>2<br/>3<br/>4<br/>5<br/>6<br/>7<br/>8<br/>9<br/>10<br/>11<br/>12<br/>13<br/>14</p> <p>People at risk of NASH</p>                                                                          | <p>Support group<br/>focussed on diet and<br/>exercise</p> | <p>No intervention</p> | <p>1. Prevention of<br/>NASH.<br/>2. Successful<br/>treatment of NASH.<br/>3. Mortality</p>                                                                                 |
| <p>15<br/>16<br/>17<br/>18</p> <p>People at risk of NASH</p>                                                                                                                                       | <p>Emotional support<br/>group for carers</p>              | <p>No intervention</p> | <p>HRQoL</p>                                                                                                                                                                |
| <p>19<br/>20<br/>21<br/>22<br/>23<br/>24<br/>25<br/>26<br/>27<br/>28<br/>29<br/>30<br/>31<br/>32<br/>33<br/>34<br/>35<br/>36</p> <p>People with NASH</p>                                           | <p>Nurse-led care</p>                                      | <p>Standard care</p>   | <p>1. Mortality.<br/>2. HRQoL.<br/>3. Requirement for<br/>liver transplantation.<br/>4. Liver cancer.<br/>5. Liver failure.<br/>6. Treatment-related<br/>complications.</p> |
| <p>37<br/>38<br/>39<br/>40<br/>41<br/>42<br/>43<br/>44<br/>45<br/>46<br/>47<br/>48<br/>49<br/>50<br/>51<br/>52<br/>53<br/>54<br/>55<br/>56<br/>57<br/>58<br/>59<br/>60</p> <p>People with NASH</p> | <p>Lifestyle: diet</p>                                     | <p>Standard care</p>   | <p>1. Mortality.<br/>2. HRQoL.<br/>3. Requirement for<br/>liver transplantation.<br/>4. Liver cancer.<br/>5. Liver failure.<br/>6. Treatment-related<br/>complications.</p> |

|                                                                                                                                                                                                                                                                                                                                                             |                         |                                                                   |                          |                                                                                                                                                                                                                     |
|-------------------------------------------------------------------------------------------------------------------------------------------------------------------------------------------------------------------------------------------------------------------------------------------------------------------------------------------------------------|-------------------------|-------------------------------------------------------------------|--------------------------|---------------------------------------------------------------------------------------------------------------------------------------------------------------------------------------------------------------------|
| 1<br>2<br>3<br>4<br>5<br>6<br>7<br>8<br>9<br>10<br>11<br>12<br>13<br>14<br>15<br>16<br>17<br>18<br>19<br>20<br>21<br>22<br>23<br>24<br>25<br>26<br>27<br>28<br>29<br>30<br>31<br>32<br>33<br>34<br>35<br>36<br>37<br>38<br>39<br>40<br>41<br>42<br>43<br>44<br>45<br>46<br>47<br>48<br>49<br>50<br>51<br>52<br>53<br>54<br>55<br>56<br>57<br>58<br>59<br>60 |                         | Different interventions to decrease anxiety and depression        | Standard care            | Anxiety and depression                                                                                                                                                                                              |
|                                                                                                                                                                                                                                                                                                                                                             | People with NASH        | Research design using support group                               | Standard research design | Help towards better research                                                                                                                                                                                        |
|                                                                                                                                                                                                                                                                                                                                                             | General population      | Life style: diet and exercise                                     | No intervention          | HRQoL                                                                                                                                                                                                               |
|                                                                                                                                                                                                                                                                                                                                                             | General population      | Education of people (patient information leaflet at GP surgeries) | No intervention          | 1. Prevention of NASH.<br>2. HRQoL.                                                                                                                                                                                 |
|                                                                                                                                                                                                                                                                                                                                                             | General population      | Screening: for liver disease                                      | No intervention          | 1. Early diagnosis of liver disease<br>2. Mortality<br>3. HRQoL<br>4. Requirement for liver transplantation<br>5. Costs<br>6. Requirement for hospital admission for severe liver damage<br>7. Primary liver cancer |
|                                                                                                                                                                                                                                                                                                                                                             | Primary school children | Lifestyle: nutritional and dietary advice                         | No intervention          | 1. Adherence to healthy diet and                                                                                                                                                                                    |



|                                                     |                                                            |                |                                                 |
|-----------------------------------------------------|------------------------------------------------------------|----------------|-------------------------------------------------|
|                                                     |                                                            |                | exercise to sustain healthy life style.         |
| People undergoing liver resection                   | Best method to assess function and volume of remnant liver | Not applicable | 1. Mortality.<br>2. HRQoL.<br>3. Complications. |
| People undergoing liver resection                   | Best method to assess cardiopulmonary function?            | Not applicable | 1. Mortality.<br>2. HRQoL.<br>3. Complications. |
| People undergoing liver resection                   | Pre-operative education                                    | Standard care  | 1. Mortality.<br>2. HRQoL.<br>3. Complications. |
| Surgeons treating people undergoing liver resection | Simulation and training of surgeons                        | Standard care  | 1. Mortality.<br>2. HRQoL.<br>3. Complications. |
| People undergoing liver resection                   | Growth factors to optimise muscle and fat content          | Standard care  | 1. Mortality.<br>2. HRQoL.<br>3. Complications. |
| People undergoing liver resection                   | Pharmacological interventions for weight loss              | Not applicable | 1. Mortality.<br>2. HRQoL.<br>3. Complications. |
| People undergoing liver resection                   | Portal vein embolisation                                   | Standard care  | 1. Mortality.<br>2. HRQoL.<br>3. Complications. |

|                                                                            |                                                     |                                                                                        |                              |                                                 |
|----------------------------------------------------------------------------|-----------------------------------------------------|----------------------------------------------------------------------------------------|------------------------------|-------------------------------------------------|
| 1<br>2<br>3<br>4<br>5<br>6<br>7<br>8<br>9                                  | People undergoing liver resection                   | Reducing systemic inflammation using steroids                                          | Standard care                | 1. Mortality.<br>2. HRQoL.<br>3. Complications. |
| 10<br>11<br>12<br>13<br>14<br>15<br>16                                     | People undergoing liver resection                   | Open liver resection                                                                   | Laparoscopic liver resection | 1. Mortality.<br>2. HRQoL.<br>3. Complications. |
| 17<br>18<br>19<br>20<br>21<br>22<br>23                                     | People undergoing liver resection                   | Tumour visualisation and localisation of the tumour                                    | Standard care                | 1. Mortality.<br>2. HRQoL.<br>3. Complications. |
| 24<br>25<br>26<br>27<br>28<br>29                                           | People undergoing liver resection                   | Goal directed therapy during operation                                                 | Standard care                | 1. Mortality.<br>2. HRQoL.<br>3. Complications. |
| 30<br>31<br>32<br>33<br>34<br>35<br>36                                     | Surgeons treating people undergoing liver resection | Use of magnifying surgical loupes during liver surgery                                 | Standard care                | 1. Mortality.<br>2. HRQoL.<br>3. Complications. |
| 37<br>38<br>39<br>40<br>41<br>42<br>43<br>44<br>45<br>46<br>47             | People undergoing liver resection                   | Portal vein pressure decrease (by the use of drugs such as vasopressin) during surgery | Standard care                | 1. Mortality.<br>2. HRQoL.<br>3. Complications. |
| 48<br>49<br>50<br>51<br>52<br>53<br>54<br>55<br>56<br>57<br>58<br>59<br>60 | People undergoing liver resection                   | Transection techniques                                                                 | Not applicable               | 1. Mortality.<br>2. HRQoL.<br>3. Complications. |

|                                                                                                                                                                                                                                                                                                                                                             |                                                                                               |                               |                                                 |                                                 |
|-------------------------------------------------------------------------------------------------------------------------------------------------------------------------------------------------------------------------------------------------------------------------------------------------------------------------------------------------------------|-----------------------------------------------------------------------------------------------|-------------------------------|-------------------------------------------------|-------------------------------------------------|
| 1<br>2<br>3<br>4<br>5<br>6<br>7<br>8<br>9<br>10<br>11<br>12<br>13<br>14<br>15<br>16<br>17<br>18<br>19<br>20<br>21<br>22<br>23<br>24<br>25<br>26<br>27<br>28<br>29<br>30<br>31<br>32<br>33<br>34<br>35<br>36<br>37<br>38<br>39<br>40<br>41<br>42<br>43<br>44<br>45<br>46<br>47<br>48<br>49<br>50<br>51<br>52<br>53<br>54<br>55<br>56<br>57<br>58<br>59<br>60 | People undergoing liver resection                                                             | Vascular occlusion techniques | Not applicable                                  | 1. Mortality.<br>2. HRQoL.<br>3. Complications. |
| People undergoing liver resection                                                                                                                                                                                                                                                                                                                           | Cardiopulmonary and pharmacological interventions for decreasing blood loss                   | Not applicable                | 1. Mortality.<br>2. HRQoL.<br>3. Complications. |                                                 |
| People undergoing liver resection                                                                                                                                                                                                                                                                                                                           | Use of peritoneal drains                                                                      | No drain                      | 1. Mortality.<br>2. HRQoL.<br>3. Complications. |                                                 |
| People undergoing liver resection                                                                                                                                                                                                                                                                                                                           | ALPPS procedure (Associating Liver Partition and Portal vein Ligation for Staged hepatectomy) | Standard care                 | 1. Mortality.<br>2. HRQoL.<br>3. Complications. |                                                 |
| People undergoing liver resection                                                                                                                                                                                                                                                                                                                           | Goal directed therapy (post-operative)                                                        | Standard care                 | 1. Mortality.<br>2. HRQoL.<br>3. Complications. |                                                 |
| People undergoing liver resection                                                                                                                                                                                                                                                                                                                           | Pain control protocol                                                                         | Standard care                 | 1. Mortality.<br>2. HRQoL.<br>3. Complications. |                                                 |
| People undergoing liver resection                                                                                                                                                                                                                                                                                                                           | Early mobilisation protocol                                                                   | Standard care                 | 1. Mortality.<br>2. HRQoL.<br>3. Complications. |                                                 |

|                                                                                                                                                                                                                                                                                                                                                             |                                                   |                                                                                          |                                     |                                                 |
|-------------------------------------------------------------------------------------------------------------------------------------------------------------------------------------------------------------------------------------------------------------------------------------------------------------------------------------------------------------|---------------------------------------------------|------------------------------------------------------------------------------------------|-------------------------------------|-------------------------------------------------|
| 1<br>2<br>3<br>4<br>5<br>6<br>7<br>8<br>9<br>10<br>11<br>12<br>13<br>14<br>15<br>16<br>17<br>18<br>19<br>20<br>21<br>22<br>23<br>24<br>25<br>26<br>27<br>28<br>29<br>30<br>31<br>32<br>33<br>34<br>35<br>36<br>37<br>38<br>39<br>40<br>41<br>42<br>43<br>44<br>45<br>46<br>47<br>48<br>49<br>50<br>51<br>52<br>53<br>54<br>55<br>56<br>57<br>58<br>59<br>60 | People undergoing liver resection                 | Early oral intake protocol                                                               | Standard care                       | 1. Mortality.<br>2. HRQoL.<br>3. Complications. |
|                                                                                                                                                                                                                                                                                                                                                             | People undergoing liver resection                 | Portal vein pressure decrease (by the use of drugs such as vasopressin) post-operatively | Standard care                       | 1. Mortality.<br>2. HRQoL.<br>3. Complications. |
|                                                                                                                                                                                                                                                                                                                                                             | People with unresectable hepatocellular carcinoma | Radioembolisation                                                                        | No intervention/other interventions | 1. Mortality.<br>2. HRQoL.<br>3. Complications. |
|                                                                                                                                                                                                                                                                                                                                                             | People with unresectable hepatocellular carcinoma | External beam radiotherapy                                                               | No intervention/other interventions | 1. Mortality.<br>2. HRQoL.<br>3. Complications. |
|                                                                                                                                                                                                                                                                                                                                                             | People with chronic hepatitis B                   | Screening for cancer                                                                     | No screening                        | 1. Mortality.<br>2. HRQoL.<br>3. Complications. |
|                                                                                                                                                                                                                                                                                                                                                             | People with hepatocellular carcinoma              | Cryotherapy                                                                              | No intervention/other interventions | 1. Mortality.<br>2. HRQoL.<br>3. Complications. |
|                                                                                                                                                                                                                                                                                                                                                             | People with hepatocellular carcinoma              | Systemic chemotherapy                                                                    | No intervention/other interventions | 1. Mortality.<br>2. HRQoL.<br>3. Complications. |

|                                                                                                                                                                                                                                                                                                                                                             |                                                                |                                  |                                     |                                                 |
|-------------------------------------------------------------------------------------------------------------------------------------------------------------------------------------------------------------------------------------------------------------------------------------------------------------------------------------------------------------|----------------------------------------------------------------|----------------------------------|-------------------------------------|-------------------------------------------------|
| 1<br>2<br>3<br>4<br>5<br>6<br>7<br>8<br>9<br>10<br>11<br>12<br>13<br>14<br>15<br>16<br>17<br>18<br>19<br>20<br>21<br>22<br>23<br>24<br>25<br>26<br>27<br>28<br>29<br>30<br>31<br>32<br>33<br>34<br>35<br>36<br>37<br>38<br>39<br>40<br>41<br>42<br>43<br>44<br>45<br>46<br>47<br>48<br>49<br>50<br>51<br>52<br>53<br>54<br>55<br>56<br>57<br>58<br>59<br>60 | People with early or very early hepatocellular carcinoma       | Treatment                        | Not applicable                      | 1. Mortality.<br>2. HRQoL.<br>3. Complications. |
|                                                                                                                                                                                                                                                                                                                                                             | People with intermediate hepatocellular carcinoma              | Treatment                        | Not applicable                      | 1. Mortality.<br>2. HRQoL.<br>3. Complications. |
|                                                                                                                                                                                                                                                                                                                                                             | People with hepatocellular carcinoma                           | Tamoxifen                        | No intervention/other interventions | 1. Mortality.<br>2. HRQoL.<br>3. Complications. |
|                                                                                                                                                                                                                                                                                                                                                             | People with unresectable hepatocellular carcinoma              | Transarterial embolisation       | No intervention/other interventions | 1. Mortality.<br>2. HRQoL.<br>3. Complications. |
|                                                                                                                                                                                                                                                                                                                                                             | People with unresectable hepatocellular carcinoma              | Tyrosine kinase inhibitors       | No intervention/other interventions | 1. Mortality.<br>2. HRQoL.<br>3. Complications. |
|                                                                                                                                                                                                                                                                                                                                                             | People undergoing liver resection for hepatocellular carcinoma | Neoadjuvant and adjuvant therapy | No intervention/other interventions | 1. Mortality.<br>2. HRQoL.<br>3. Complications. |
|                                                                                                                                                                                                                                                                                                                                                             | People with unresectable hepatocellular carcinoma              | Transarterial chemoembolisation  | No intervention/other interventions | 1. Mortality.<br>2. HRQoL.<br>3. Complications. |
|                                                                                                                                                                                                                                                                                                                                                             | People with hepatocellular carcinoma                           | Interferon                       | No intervention/other interventions | 1. Mortality.<br>2. HRQoL.<br>3. Complications. |

|                                                                                                                                                                                                                                                                                                                                                             |                                                              |                                     |                                                 |                                                 |
|-------------------------------------------------------------------------------------------------------------------------------------------------------------------------------------------------------------------------------------------------------------------------------------------------------------------------------------------------------------|--------------------------------------------------------------|-------------------------------------|-------------------------------------------------|-------------------------------------------------|
| 1<br>2<br>3<br>4<br>5<br>6<br>7<br>8<br>9<br>10<br>11<br>12<br>13<br>14<br>15<br>16<br>17<br>18<br>19<br>20<br>21<br>22<br>23<br>24<br>25<br>26<br>27<br>28<br>29<br>30<br>31<br>32<br>33<br>34<br>35<br>36<br>37<br>38<br>39<br>40<br>41<br>42<br>43<br>44<br>45<br>46<br>47<br>48<br>49<br>50<br>51<br>52<br>53<br>54<br>55<br>56<br>57<br>58<br>59<br>60 | People with hepatocellular carcinoma                         | Surgical resection                  | Liver transplantation                           | 1. Mortality.<br>2. HRQoL.<br>3. Complications. |
| People undergoing liver resection for hepatocellular carcinoma                                                                                                                                                                                                                                                                                              | Anterior approach                                            | Conventional liver resection        | 1. Mortality.<br>2. HRQoL.<br>3. Complications. |                                                 |
| People with hepatocellular carcinoma                                                                                                                                                                                                                                                                                                                        | Radiofrequency ablation                                      | No intervention/other interventions | 1. Mortality.<br>2. HRQoL.<br>3. Complications. |                                                 |
| People undergoing liver resection for hepatocellular carcinoma                                                                                                                                                                                                                                                                                              | Post-operative transarterial chemoembolisation               | No intervention/other interventions | 1. Mortality.<br>2. HRQoL.<br>3. Complications. |                                                 |
| People undergoing liver resection for hepatocellular carcinoma                                                                                                                                                                                                                                                                                              | Post-operative lamivudine with or without adefovir dipivoxil | No intervention/other interventions | 1. Mortality.<br>2. HRQoL.<br>3. Complications. |                                                 |
| People with advanced biliary tract carcinoma                                                                                                                                                                                                                                                                                                                | gemcitabine-based chemotherapy                               | No intervention/other interventions | 1. Mortality.<br>2. HRQoL.<br>3. Complications. |                                                 |
| People with unresectable cholangiocarcinoma                                                                                                                                                                                                                                                                                                                 | Endoscopic treatment                                         | Surgery                             | 1. Mortality.<br>2. HRQoL.<br>3. Complications. |                                                 |
| People undergoing liver transplantation                                                                                                                                                                                                                                                                                                                     | Pharmacological interventions for                            | No intervention/other interventions | 1. Mortality.<br>2. HRQoL.<br>3. Complications. |                                                 |

|                                                                   |                                                         |                                     |                                                 |
|-------------------------------------------------------------------|---------------------------------------------------------|-------------------------------------|-------------------------------------------------|
|                                                                   | reducing ischaemia<br>reperfusion injury                |                                     |                                                 |
| People undergoing liver transplantation for hepatitis B infection | Antibiotic prophylaxis                                  | No intervention/other interventions | 1. Mortality.<br>2. HRQoL.<br>3. Complications. |
| People undergoing liver transplantation for hepatitis B infection | Hepatitis B immune globulin                             | No intervention/other interventions | 1. Mortality.<br>2. HRQoL.<br>3. Complications. |
| People undergoing liver transplantation                           | Prostaglandins                                          | No intervention/other interventions | 1. Mortality.<br>2. HRQoL.<br>3. Complications. |
| People undergoing haemopoietic stem cell transplantation          | Interventions to prevent hepatic veno-occlusive disease | Not applicable                      | 1. Mortality.<br>2. HRQoL.<br>3. Complications. |
| People undergoing haemopoietic stem cell transplantation          | Interventions to treat hepatic veno-occlusive disease   | Not applicable                      | 1. Mortality.<br>2. HRQoL.<br>3. Complications. |
| People undergoing liver transplantation                           | Immunosuppressive regimens                              | Not applicable                      | 1. Mortality.<br>2. HRQoL.<br>3. Complications. |
| People undergoing liver transplantation                           | Venovenous bypass                                       | No intervention                     | 1. Mortality.<br>2. HRQoL.<br>3. Complications. |

|                                                                            |                                         |                                                                                            |                                    |                                                 |
|----------------------------------------------------------------------------|-----------------------------------------|--------------------------------------------------------------------------------------------|------------------------------------|-------------------------------------------------|
| 1<br>2<br>3<br>4<br>5<br>6<br>7<br>8<br>9                                  | People undergoing liver transplantation | Ischaemic preconditioning                                                                  | No intervention                    | 1. Mortality.<br>2. HRQoL.<br>3. Complications. |
| 10<br>11<br>12<br>13<br>14<br>15<br>16                                     | People undergoing liver transplantation | Methods of biliary reconstruction                                                          | Not applicable                     | 1. Mortality.<br>2. HRQoL.<br>3. Complications. |
| 17<br>18<br>19<br>20<br>21<br>22<br>23<br>24<br>25<br>26<br>27             | People undergoing liver transplantation | Methods of preventing bacterial sepsis and wound complications after liver transplantation | Not applicable                     | 1. Mortality.<br>2. HRQoL.<br>3. Complications. |
| 28<br>29<br>30<br>31<br>32<br>33<br>34                                     | People undergoing liver transplantation | Techniques of flushing and reperfusion                                                     | Not applicable                     | 1. Mortality.<br>2. HRQoL.<br>3. Complications. |
| 35<br>36<br>37<br>38<br>39<br>40<br>41                                     | People undergoing liver transplantation | Abdominal drainage                                                                         | No intervention                    | 1. Mortality.<br>2. HRQoL.<br>3. Complications. |
| 42<br>43<br>44<br>45<br>46<br>47                                           | People undergoing liver transplantation | Piggy-back                                                                                 | Conventional liver transplantation | 1. Mortality.<br>2. HRQoL.<br>3. Complications. |
| 48<br>49<br>50<br>51<br>52<br>53<br>54<br>55<br>56<br>57<br>58<br>59<br>60 | People undergoing liver transplantation | Methods to decrease blood loss and transfusion requirements                                | Not applicable                     | 1. Mortality.<br>2. HRQoL.<br>3. Complications. |



|                                                                            |                                                                   |                                                                         |                                                              |                                                 |
|----------------------------------------------------------------------------|-------------------------------------------------------------------|-------------------------------------------------------------------------|--------------------------------------------------------------|-------------------------------------------------|
| 1<br>2<br>3<br>4<br>5<br>6<br>7<br>8<br>9                                  | People undergoing liver transplantation                           | Antiviral prophylaxis for prevention of hepatitis C infection           | Not applicable                                               | 1. Mortality.<br>2. HRQoL.<br>3. Complications. |
| 10<br>11<br>12<br>13<br>14<br>15<br>16                                     | People undergoing liver transplantation                           | Antiviral treatment of hepatitis C infection                            | Not applicable                                               | 1. Mortality.<br>2. HRQoL.<br>3. Complications. |
| 17<br>18<br>19<br>20<br>21<br>22<br>23<br>24<br>25<br>26<br>27             | People undergoing liver transplantation for hepatitis B infection | Lamivudine or adefovir dipivoxil                                        | No intervention/other interventions including immunoglobulin | 1. Mortality.<br>2. HRQoL.<br>3. Complications. |
| 28<br>29<br>30<br>31<br>32<br>33<br>34                                     | People undergoing liver transplantation                           | Nutritional interventions                                               | Not applicable                                               | 1. Mortality.<br>2. HRQoL.<br>3. Complications. |
| 35<br>36<br>37<br>38<br>39<br>40<br>41                                     | People undergoing liver transplantation                           | Bile acids                                                              | No intervention/other interventions                          | 1. Mortality.<br>2. HRQoL.<br>3. Complications. |
| 42<br>43<br>44<br>45<br>46<br>47                                           | People undergoing liver transplantation                           | Celsior solution                                                        | UW solution                                                  | 1. Mortality.<br>2. HRQoL.<br>3. Complications. |
| 48<br>49<br>50<br>51<br>52<br>53<br>54<br>55<br>56<br>57<br>58<br>59<br>60 | People undergoing liver resection                                 | Pharmacological interventions for reducing ischaemia reperfusion injury | No intervention/other interventions                          | 1. Mortality.<br>2. HRQoL.<br>3. Complications. |

|                                                                |                                                                         |                                       |                                     |                                                 |
|----------------------------------------------------------------|-------------------------------------------------------------------------|---------------------------------------|-------------------------------------|-------------------------------------------------|
| 1<br>2<br>3<br>4<br>5<br>6<br>7<br>8<br>9                      | People undergoing liver resection                                       | Fibrin-based haemostatic agents       | No intervention/other interventions | 1. Mortality.<br>2. HRQoL.<br>3. Complications. |
| 10<br>11<br>12<br>13<br>14<br>15<br>16                         | People undergoing liver resection for colorectal liver metastases       | Neoadjuvant chemotherapy              | No intervention/other interventions | 1. Mortality.<br>2. HRQoL.<br>3. Complications. |
| 17<br>18<br>19<br>20<br>21<br>22<br>23                         | People with colorectal liver metastases                                 | Resection                             | Other interventions                 | 1. Mortality.<br>2. HRQoL.<br>3. Complications. |
| 24<br>25<br>26<br>27<br>28<br>29                               | People undergoing liver resection                                       | Ischaemic preconditioning             | No intervention                     | 1. Mortality.<br>2. HRQoL.<br>3. Complications. |
| 30<br>31<br>32<br>33<br>34<br>35<br>36                         | People undergoing liver resection                                       | Interventions for reducing blood loss | No intervention/other interventions | 1. Mortality.<br>2. HRQoL.<br>3. Complications. |
| 37<br>38<br>39<br>40<br>41<br>42<br>43                         | People undergoing liver resection                                       | Methods of decreasing infection       | No intervention/other interventions | 1. Mortality.<br>2. HRQoL.<br>3. Complications. |
| 44<br>45<br>46<br>47<br>48<br>49                               | People with hepatic node positive colorectal liver metastases           | Resection                             | No resection                        | 1. Mortality.<br>2. HRQoL.<br>3. Complications. |
| 50<br>51<br>52<br>53<br>54<br>55<br>56<br>57<br>58<br>59<br>60 | People undergoing liver resection for resectable neuroendocrine tumours | Resection                             | No resection                        | 1. Mortality.<br>2. HRQoL.<br>3. Complications. |

|                                                                |                                                                              |                                      |                                     |                                                 |
|----------------------------------------------------------------|------------------------------------------------------------------------------|--------------------------------------|-------------------------------------|-------------------------------------------------|
| 1<br>2<br>3<br>4<br>5<br>6<br>7<br>8<br>9                      | People undergoing liver resection or ablation of colorectal liver metastases | Hepatic artery adjuvant chemotherapy | No intervention/other interventions | 1. Mortality.<br>2. HRQoL.<br>3. Complications. |
| 10<br>11<br>12<br>13<br>14<br>15<br>16                         | People undergoing liver resection                                            | Laparoscopic liver resection         | Open liver resection                | 1. Mortality.<br>2. HRQoL.<br>3. Complications. |
| 17<br>18<br>19<br>20<br>21<br>22<br>23                         | People with hepatic encephalopathy                                           | Nonabsorbable disaccharides          | No intervention/other interventions | 1. Mortality.<br>2. HRQoL.<br>3. Complications. |
| 24<br>25<br>26<br>27<br>28<br>29                               | People with hepatic encephalopathy                                           | Benzodiazepine receptor antagonists  | No intervention/other interventions | 1. Mortality.<br>2. HRQoL.<br>3. Complications. |
| 30<br>31<br>32<br>33<br>34<br>35<br>36                         | People with hepatic encephalopathy                                           | Antibiotics                          | No intervention/other interventions | 1. Mortality.<br>2. HRQoL.<br>3. Complications. |
| 37<br>38<br>39<br>40<br>41<br>42<br>43                         | People with hepatic encephalopathy                                           | Dopamine agents                      | No intervention/other interventions | 1. Mortality.<br>2. HRQoL.<br>3. Complications. |
| 44<br>45<br>46<br>47<br>48<br>49                               | People with hepatic encephalopathy                                           | Rifaximin                            | No intervention/other interventions | 1. Mortality.<br>2. HRQoL.<br>3. Complications. |
| 50<br>51<br>52<br>53<br>54<br>55<br>56<br>57<br>58<br>59<br>60 | People with hepatic encephalopathy                                           | Acetyl-L-carnitine                   | No intervention/other interventions | 1. Mortality.<br>2. HRQoL.<br>3. Complications. |

|                                                                |                                    |                                   |                                     |                                                 |
|----------------------------------------------------------------|------------------------------------|-----------------------------------|-------------------------------------|-------------------------------------------------|
| 1<br>2<br>3<br>4<br>5<br>6<br>7<br>8<br>9                      | People with hepatic encephalopathy | Probiotics                        | No intervention/other interventions | 1. Mortality.<br>2. HRQoL.<br>3. Complications. |
| 10<br>11<br>12<br>13<br>14<br>15<br>16                         | People with hepatic encephalopathy | Naloxone                          | No intervention/other interventions | 1. Mortality.<br>2. HRQoL.<br>3. Complications. |
| 17<br>18<br>19<br>20<br>21<br>22<br>23                         | People with hepatic encephalopathy | L-ornithine-L-aspartate           | No intervention/other interventions | 1. Mortality.<br>2. HRQoL.<br>3. Complications. |
| 24<br>25<br>26<br>27<br>28<br>29                               | People with NAFLD                  | Pharmacological treatments        | Not applicable                      | 1. Mortality.<br>2. HRQoL.<br>3. Complications. |
| 30<br>31<br>32<br>33<br>34<br>35<br>36                         | People with NAFLD                  | Herbal medicines                  | No intervention/other interventions | 1. Mortality.<br>2. HRQoL.<br>3. Complications. |
| 37<br>38<br>39<br>40<br>41<br>42<br>43                         | People with NAFLD                  | Weight reduction                  | Not applicable                      | 1. Mortality.<br>2. HRQoL.<br>3. Complications. |
| 44<br>45<br>46<br>47<br>48<br>49                               | People with liver metastases       | Transarterial (chemo)embolisation | No intervention/other interventions | 1. Mortality.<br>2. HRQoL.<br>3. Complications. |
| 50<br>51<br>52<br>53<br>54<br>55<br>56<br>57<br>58<br>59<br>60 | People with liver metastases       | Microwave coagulation             | No intervention/other interventions | 1. Mortality.<br>2. HRQoL.<br>3. Complications. |

|                                                                |                                                                |                                         |                                            |                                                 |
|----------------------------------------------------------------|----------------------------------------------------------------|-----------------------------------------|--------------------------------------------|-------------------------------------------------|
| 1<br>2<br>3<br>4<br>5<br>6<br>7<br>8<br>9                      | People with liver metastases                                   | Cryotherapy                             | No<br>intervention/oth<br>er interventions | 1. Mortality.<br>2. HRQoL.<br>3. Complications. |
| 10<br>11<br>12<br>13<br>14<br>15<br>16                         | People with liver metastases                                   | Radiofrequency<br>ablation              | No<br>intervention/oth<br>er interventions | 1. Mortality.<br>2. HRQoL.<br>3. Complications. |
| 17<br>18<br>19<br>20<br>21<br>22<br>23                         | People with unresectable<br>neuroendocrine liver<br>metastases | Palliative cytoreductive<br>surgery     | Other palliative<br>interventions          | 1. Mortality.<br>2. HRQoL.<br>3. Complications. |
| 24<br>25<br>26<br>27<br>28<br>29                               | People with unresectable<br>colorectal liver metastases        | Hepatic arterial<br>infusion            | Systemic<br>chemotherapy                   | 1. Mortality.<br>2. HRQoL.<br>3. Complications. |
| 30<br>31<br>32<br>33<br>34<br>35<br>36                         | People with liver metastases                                   | Electro-coagulation                     | No<br>intervention/oth<br>er interventions | 1. Mortality.<br>2. HRQoL.<br>3. Complications. |
| 37<br>38<br>39<br>40<br>41<br>42<br>43                         | People with liver metastases                                   | Percutaneous ethanol<br>injection       | No<br>intervention/oth<br>er interventions | 1. Mortality.<br>2. HRQoL.<br>3. Complications. |
| 44<br>45<br>46<br>47<br>48<br>49                               | People with unresectable<br>colorectal liver metastases        | Chemotherapy for<br>downstaging         | No<br>intervention/oth<br>er interventions | 1. Mortality.<br>2. HRQoL.<br>3. Complications. |
| 50<br>51<br>52<br>53<br>54<br>55<br>56<br>57<br>58<br>59<br>60 | People with colorectal liver<br>metastases                     | Selective internal<br>radiation therapy | No<br>intervention/oth<br>er interventions | 1. Mortality.<br>2. HRQoL.<br>3. Complications. |

|                                                                                                                                                                                                                                                                                                                                                             |                                                                        |                                    |                               |                                                 |
|-------------------------------------------------------------------------------------------------------------------------------------------------------------------------------------------------------------------------------------------------------------------------------------------------------------------------------------------------------------|------------------------------------------------------------------------|------------------------------------|-------------------------------|-------------------------------------------------|
| 1<br>2<br>3<br>4<br>5<br>6<br>7<br>8<br>9<br>10<br>11<br>12<br>13<br>14<br>15<br>16<br>17<br>18<br>19<br>20<br>21<br>22<br>23<br>24<br>25<br>26<br>27<br>28<br>29<br>30<br>31<br>32<br>33<br>34<br>35<br>36<br>37<br>38<br>39<br>40<br>41<br>42<br>43<br>44<br>45<br>46<br>47<br>48<br>49<br>50<br>51<br>52<br>53<br>54<br>55<br>56<br>57<br>58<br>59<br>60 | People with gallbladder polyp                                          | Cholecystectomy                    | No cholecystectomy            | 1. Mortality.<br>2. HRQoL.<br>3. Complications. |
|                                                                                                                                                                                                                                                                                                                                                             | People with gallbladder dyskinesia                                     | Cholecystectomy                    | No cholecystectomy            | 1. Mortality.<br>2. HRQoL.<br>3. Complications. |
|                                                                                                                                                                                                                                                                                                                                                             | People undergoing laparoscopic cholecystectomy                         | Methods of cystic duct occlusion   | Not applicable                | 1. Mortality.<br>2. HRQoL.<br>3. Complications. |
|                                                                                                                                                                                                                                                                                                                                                             | People undergoing laparoscopic cholecystectomy for acute cholecystitis | Early laparoscopic cholecystectomy | Delayed cholecystectomy       | 1. Mortality.<br>2. HRQoL.<br>3. Complications. |
|                                                                                                                                                                                                                                                                                                                                                             | People undergoing cholecystectomy                                      | Laparoscopic cholecystectomy       | Open cholecystectomy          | 1. Mortality.<br>2. HRQoL.<br>3. Complications. |
|                                                                                                                                                                                                                                                                                                                                                             | People undergoing cholecystectomy                                      | Laparoscopic cholecystectomy       | Mini-incision cholecystectomy | 1. Mortality.<br>2. HRQoL.<br>3. Complications. |
|                                                                                                                                                                                                                                                                                                                                                             | People undergoing cholecystectomy                                      | Mini-incision cholecystectomy      | Open cholecystectomy          | 1. Mortality.<br>2. HRQoL.<br>3. Complications. |
|                                                                                                                                                                                                                                                                                                                                                             | People undergoing laparoscopic cholecystectomy                         | Abdominal wall lift                | Pneumoperitoneum              | 1. Mortality.<br>2. HRQoL.<br>3. Complications. |

|                                                                                                                                                                                                                                                                                                                                                             |                                                                  |                                                           |                         |                                                 |
|-------------------------------------------------------------------------------------------------------------------------------------------------------------------------------------------------------------------------------------------------------------------------------------------------------------------------------------------------------------|------------------------------------------------------------------|-----------------------------------------------------------|-------------------------|-------------------------------------------------|
| 1<br>2<br>3<br>4<br>5<br>6<br>7<br>8<br>9<br>10<br>11<br>12<br>13<br>14<br>15<br>16<br>17<br>18<br>19<br>20<br>21<br>22<br>23<br>24<br>25<br>26<br>27<br>28<br>29<br>30<br>31<br>32<br>33<br>34<br>35<br>36<br>37<br>38<br>39<br>40<br>41<br>42<br>43<br>44<br>45<br>46<br>47<br>48<br>49<br>50<br>51<br>52<br>53<br>54<br>55<br>56<br>57<br>58<br>59<br>60 | People undergoing laparoscopic cholecystectomy                   | Abdominal drainage                                        | No drain                | 1. Mortality.<br>2. HRQoL.<br>3. Complications. |
|                                                                                                                                                                                                                                                                                                                                                             | People undergoing laparoscopic cholecystectomy for biliary colic | Early laparoscopic cholecystectomy                        | Delayed cholecystectomy | 1. Mortality.<br>2. HRQoL.<br>3. Complications. |
|                                                                                                                                                                                                                                                                                                                                                             | People undergoing laparoscopic cholecystectomy                   | Intra-peritoneal saline instillation                      | No instillation         | 1. Mortality.<br>2. HRQoL.<br>3. Complications. |
|                                                                                                                                                                                                                                                                                                                                                             | People undergoing laparoscopic cholecystectomy                   | Methods of intraperitoneal local anaesthetic instillation | Not applicable          | 1. Mortality.<br>2. HRQoL.<br>3. Complications. |
|                                                                                                                                                                                                                                                                                                                                                             | People undergoing laparoscopic cholecystectomy                   | Methods of local anaesthetic wound infiltration           | Not applicable          | 1. Mortality.<br>2. HRQoL.<br>3. Complications. |
|                                                                                                                                                                                                                                                                                                                                                             | People undergoing laparoscopic cholecystectomy                   | Three-dimensional imaging                                 | Two-dimensional imaging | 1. Mortality.<br>2. HRQoL.<br>3. Complications. |
|                                                                                                                                                                                                                                                                                                                                                             | People with asymptomatic gallstones                              | Cholecystectomy                                           | No cholecystectomy      | 1. Mortality.<br>2. HRQoL.<br>3. Complications. |
|                                                                                                                                                                                                                                                                                                                                                             | People undergoing open cholecystectomy                           | Abdominal drainage                                        | No drain                | 1. Mortality.<br>2. HRQoL.<br>3. Complications. |

|                                                                                        |                                                |                                                                                 |                                    |                                                 |
|----------------------------------------------------------------------------------------|------------------------------------------------|---------------------------------------------------------------------------------|------------------------------------|-------------------------------------------------|
| 1<br>2<br>3<br>4<br>5<br>6<br>7<br>8<br>9                                              | People undergoing laparoscopic cholecystectomy | Robotic assistant                                                               | Human assistant                    | 1. Mortality.<br>2. HRQoL.<br>3. Complications. |
| 10<br>11<br>12<br>13<br>14<br>15<br>16                                                 | People undergoing laparoscopic cholecystectomy | Methods of gallbladder dissection                                               | Not applicable                     | 1. Mortality.<br>2. HRQoL.<br>3. Complications. |
| 17<br>18<br>19<br>20<br>21<br>22<br>23<br>24<br>25                                     | People undergoing laparoscopic cholecystectomy | Low pressure pneumoperitoneum                                                   | Standard pressure pneumoperitoneum | 1. Mortality.<br>2. HRQoL.<br>3. Complications. |
| 26<br>27<br>28<br>29<br>30<br>31<br>32                                                 | People undergoing laparoscopic cholecystectomy | Education of patients                                                           | Standard care                      | 1. Mortality.<br>2. HRQoL.<br>3. Complications. |
| 33<br>34<br>35<br>36<br>37<br>38                                                       | People undergoing laparoscopic cholecystectomy | Miniports                                                                       | Standard ports                     | 1. Mortality.<br>2. HRQoL.<br>3. Complications. |
| 39<br>40<br>41<br>42<br>43<br>44<br>45                                                 | People undergoing laparoscopic cholecystectomy | Number of ports                                                                 | Not applicable                     | 1. Mortality.<br>2. HRQoL.<br>3. Complications. |
| 46<br>47<br>48<br>49<br>50<br>51<br>52<br>53<br>54<br>55<br>56<br>57<br>58<br>59<br>60 | People undergoing laparoscopic cholecystectomy | Pharmacological interventions for prevention or treatment of postoperative pain | Not applicable                     | 1. Mortality.<br>2. HRQoL.<br>3. Complications. |



|                                                                                                                                                                                                                                                                                                                                                             |                                                                                                                                                              |
|-------------------------------------------------------------------------------------------------------------------------------------------------------------------------------------------------------------------------------------------------------------------------------------------------------------------------------------------------------------|--------------------------------------------------------------------------------------------------------------------------------------------------------------|
| 1<br>2<br>3<br>4<br>5<br>6<br>7<br>8<br>9<br>10<br>11<br>12<br>13<br>14<br>15<br>16<br>17<br>18<br>19<br>20<br>21<br>22<br>23<br>24<br>25<br>26<br>27<br>28<br>29<br>30<br>31<br>32<br>33<br>34<br>35<br>36<br>37<br>38<br>39<br>40<br>41<br>42<br>43<br>44<br>45<br>46<br>47<br>48<br>49<br>50<br>51<br>52<br>53<br>54<br>55<br>56<br>57<br>58<br>59<br>60 | <p>People undergoing laparoscopic cholecystectomy</p> <p>Glucocorticoids</p> <p>No intervention</p> <p>1. Mortality.<br/>2. HRQoL.<br/>3. Complications.</p> |
| <p>People who have undergone endoscopic sphincterotomy for gallstone related complications</p> <p>Early cholecystectomy</p> <p>Delayed or no cholecystectomy</p> <p>1. Mortality.<br/>2. HRQoL.<br/>3. Complications.</p>                                                                                                                                   |                                                                                                                                                              |
| <p>People undergoing laparoscopic cholecystectomy</p> <p>Antibiotic prophylaxis</p> <p>Not applicable</p> <p>1. Mortality.<br/>2. HRQoL.<br/>3. Complications.</p>                                                                                                                                                                                          |                                                                                                                                                              |
| <p>People undergoing laparoscopic cholecystectomy</p> <p>Day surgery</p> <p>Overnight stay</p> <p>1. Mortality.<br/>2. HRQoL.<br/>3. Complications.</p>                                                                                                                                                                                                     |                                                                                                                                                              |
| <p>People undergoing day surgery laparoscopic cholecystectomy</p> <p>Anaesthetic regimens</p> <p>Not applicable</p> <p>1. Mortality.<br/>2. HRQoL.<br/>3. Complications.</p>                                                                                                                                                                                |                                                                                                                                                              |
| <p>People with common bile duct stones undergoing laparoscopic cholecystectomy</p> <p>Per-operative endoscopic sphincterotomy</p> <p>Pre-operative endoscopic sphincterotomy</p> <p>1. Mortality.<br/>2. HRQoL.<br/>3. Complications.</p>                                                                                                                   |                                                                                                                                                              |
| <p>People with suspected bile duct stenosis</p> <p>Magnetic resonance cholangiopancreatography</p> <p>Not applicable</p> <p>1. Mortality.<br/>2. HRQoL.<br/>3. Complications.</p>                                                                                                                                                                           |                                                                                                                                                              |

|                                                       |                                                    |                                                |                                             |                                                 |
|-------------------------------------------------------|----------------------------------------------------|------------------------------------------------|---------------------------------------------|-------------------------------------------------|
| 1<br>2<br>3<br>4<br>5<br>6<br>7<br>8<br>9<br>10<br>11 | People with suspected bile duct stones             | Endoscopic ultrasound                          | Magnetic resonance cholangiopancreatography | 1. Mortality.<br>2. HRQoL.<br>3. Complications. |
| 12<br>13<br>14<br>15<br>16<br>17<br>18                | People with suspected bile duct stones             | Endoscopic retrograde cholangiopancreatography | Intraoperative cholangiography              | 1. Mortality.<br>2. HRQoL.<br>3. Complications. |
| 19<br>20<br>21<br>22<br>23<br>24<br>25                | People with suspected bile duct stones             | Liver function tests                           | Transabdominal ultrasound                   | 1. Mortality.<br>2. HRQoL.<br>3. Complications. |
| 26<br>27<br>28<br>29<br>30<br>31<br>32                | People undergoing surgery for biliary tract cancer | Pre-operative biliary stenting                 | No stenting                                 | 1. Mortality.<br>2. HRQoL.<br>3. Complications. |
| 33<br>34<br>35<br>36<br>37<br>38                      | People with uncomplicated amoebic liver abscess    | Percutaneous procedure plus metronidazole      | Metronidazole alone                         | 1. Mortality.<br>2. HRQoL.<br>3. Complications. |
| 39<br>40<br>41<br>42<br>43<br>44<br>45                | People with benign liver tumours                   | Liver resection                                | No liver resection                          | 1. Mortality.<br>2. HRQoL.<br>3. Complications. |
| 46<br>47<br>48<br>49<br>50<br>51<br>52                | People with sphincter of oddi dysfunction          | Sphincterotomy                                 | No sphincterotomy                           | 1. Mortality.<br>2. HRQoL.<br>3. Complications. |
| 53<br>54<br>55<br>56<br>57<br>58<br>59<br>60          | People with cirrhosis                              | Colchicine                                     | No intervention/other interventions         | 1. Mortality.<br>2. HRQoL.<br>3. Complications. |

|                                                    |                                     |                                                                    |                                     |                                                 |
|----------------------------------------------------|-------------------------------------|--------------------------------------------------------------------|-------------------------------------|-------------------------------------------------|
| 1<br>2<br>3<br>4<br>5<br>6<br>7<br>8<br>9          | People with blunt liver injury      | Non-surgical treatment                                             | Surgery                             | 1. Mortality.<br>2. HRQoL.<br>3. Complications. |
| 10<br>11<br>12<br>13<br>14<br>15<br>16             | People with common bile duct stones | Surgical treatment                                                 | Endoscopic intervention             | 1. Mortality.<br>2. HRQoL.<br>3. Complications. |
| 17<br>18<br>19<br>20<br>21<br>22<br>23             | People at risk of gallstones        | Lifestyle: Diets for primary prevention of gallstones              | Not applicable                      | 1. Mortality.<br>2. HRQoL.<br>3. Complications. |
| 24<br>25<br>26<br>27<br>28<br>29<br>30<br>31<br>32 | People at risk of gallstones        | Pharmacological interventions for primary prevention of gallstones | Not applicable                      | 1. Mortality.<br>2. HRQoL.<br>3. Complications. |
| 33<br>34<br>35<br>36<br>37<br>38                   | People with common bile duct stones | Sphincteroplasty                                                   | Sphincterotomy                      | 1. Mortality.<br>2. HRQoL.<br>3. Complications. |
| 39<br>40<br>41<br>42<br>43<br>44<br>45             | People with biliary colic           | Bile acids                                                         | No intervention/other interventions | 1. Mortality.<br>2. HRQoL.<br>3. Complications. |
| 46<br>47<br>48<br>49<br>50<br>51<br>52             | People with biliary colic           | Non-steroidal anti-inflammatory drugs                              | No intervention/other interventions | 1. Mortality.<br>2. HRQoL.<br>3. Complications. |
| 53<br>54<br>55<br>56<br>57<br>58<br>59<br>60       | People with chronic hepatitis C     | Pharmacological treatments                                         | Not applicable                      | 1. Mortality.<br>2. HRQoL.<br>3. Complications. |

|                                                                                                                                                                                                                                                                                                                                                             |                                                 |                                     |                                                 |                                                 |
|-------------------------------------------------------------------------------------------------------------------------------------------------------------------------------------------------------------------------------------------------------------------------------------------------------------------------------------------------------------|-------------------------------------------------|-------------------------------------|-------------------------------------------------|-------------------------------------------------|
| 1<br>2<br>3<br>4<br>5<br>6<br>7<br>8<br>9<br>10<br>11<br>12<br>13<br>14<br>15<br>16<br>17<br>18<br>19<br>20<br>21<br>22<br>23<br>24<br>25<br>26<br>27<br>28<br>29<br>30<br>31<br>32<br>33<br>34<br>35<br>36<br>37<br>38<br>39<br>40<br>41<br>42<br>43<br>44<br>45<br>46<br>47<br>48<br>49<br>50<br>51<br>52<br>53<br>54<br>55<br>56<br>57<br>58<br>59<br>60 | People with chronic hepatitis B                 | Pharmacological treatments          | Not applicable                                  | 1. Mortality.<br>2. HRQoL.<br>3. Complications. |
| People with chronic hepatitis D                                                                                                                                                                                                                                                                                                                             | Pharmacological treatments                      | Not applicable                      | 1. Mortality.<br>2. HRQoL.<br>3. Complications. |                                                 |
| People exposed to hepatitis A                                                                                                                                                                                                                                                                                                                               | Post-exposure vaccines                          | Not applicable                      | 1. Mortality.<br>2. HRQoL.<br>3. Complications. |                                                 |
| General population                                                                                                                                                                                                                                                                                                                                          | Immunisation against Hepatitis A                | No immunisation                     | 1. Mortality.<br>2. HRQoL.<br>3. Complications. |                                                 |
| People exposed to hepatitis A                                                                                                                                                                                                                                                                                                                               | Post-exposure immunoglobulins                   | Not applicable                      | 1. Mortality.<br>2. HRQoL.<br>3. Complications. |                                                 |
| People with biliary stent                                                                                                                                                                                                                                                                                                                                   | Ursodeoxycholic acid to prevent stent occlusion | No intervention/other interventions | 1. Mortality.<br>2. HRQoL.<br>3. Complications. |                                                 |
| People with acute hepatitis B                                                                                                                                                                                                                                                                                                                               | Pharmacological treatments                      | Not applicable                      | 1. Mortality.<br>2. HRQoL.<br>3. Complications. |                                                 |
| Healthcare professionals                                                                                                                                                                                                                                                                                                                                    | Hepatitis B vaccination                         | Not applicable                      | 1. Mortality.<br>2. HRQoL.<br>3. Complications. |                                                 |

|                                                                  |                         |                                     |                                                 |
|------------------------------------------------------------------|-------------------------|-------------------------------------|-------------------------------------------------|
| Pregnant women with Hepatitis B                                  | Immunoglobulins         | No intervention/other interventions | 1. Mortality.<br>2. HRQoL.<br>3. Complications. |
| Newborns of HBSAg (hepatitis B surface antigen) positive mothers | Immunisation            | No intervention/other interventions | 1. Mortality.<br>2. HRQoL.<br>3. Complications. |
| People with chronic hepatitis B                                  | Medicinal herbs         | No intervention/other interventions | 1. Mortality.<br>2. HRQoL.<br>3. Complications. |
| Asymptomatic Hepatitis B carriers                                | Medicinal herbs         | No intervention/other interventions | 1. Mortality.<br>2. HRQoL.<br>3. Complications. |
| People with chronic hepatitis B                                  | Acupuncture             | No intervention/other interventions | 1. Mortality.<br>2. HRQoL.<br>3. Complications. |
| People with acute hepatitis B                                    | Medicinal herbs         | No intervention/other interventions | 1. Mortality.<br>2. HRQoL.<br>3. Complications. |
| General population                                               | Hepatitis B vaccination | Not applicable                      | 1. Mortality.<br>2. HRQoL.<br>3. Complications. |
| Pregnant women with Hepatitis B                                  | Lamivudine              | No intervention/other interventions | 1. Mortality.<br>2. HRQoL.<br>3. Complications. |

|                                                                |                                                           |                                               |                                     |                                                 |
|----------------------------------------------------------------|-----------------------------------------------------------|-----------------------------------------------|-------------------------------------|-------------------------------------------------|
| 1<br>2<br>3<br>4<br>5<br>6<br>7<br>8<br>9                      | People with HIV infection                                 | Hepatitis B vaccination                       | Not applicable                      | 1. Mortality.<br>2. HRQoL.<br>3. Complications. |
| 10<br>11<br>12<br>13<br>14<br>15<br>16                         | People who have received Hepatitis B vaccination          | Booster dose                                  | No booster dose                     | 1. Mortality.<br>2. HRQoL.<br>3. Complications. |
| 17<br>18<br>19<br>20<br>21<br>22<br>23                         | Pregnant women with Hepatitis B                           | Hepatitis B vaccination                       | No intervention/other interventions | 1. Mortality.<br>2. HRQoL.<br>3. Complications. |
| 24<br>25<br>26<br>27<br>28<br>29                               | People with renal failure                                 | Hepatitis B vaccination                       | No intervention/other interventions | 1. Mortality.<br>2. HRQoL.<br>3. Complications. |
| 30<br>31<br>32<br>33<br>34<br>35<br>36                         | People with chronic hepatitis C and peripheral neuropathy | Treatments                                    | Not applicable                      | 1. Mortality.<br>2. HRQoL.<br>3. Complications. |
| 37<br>38<br>39<br>40<br>41<br>42<br>43                         | People in haemodialysis units                             | Isolation to prevent Hepatitis C transmission | No isolation                        | 1. Mortality.<br>2. HRQoL.<br>3. Complications. |
| 44<br>45<br>46<br>47<br>48<br>49                               | People with acute hepatitis C                             | Pharmacological treatments                    | Not applicable                      | 1. Mortality.<br>2. HRQoL.<br>3. Complications. |
| 50<br>51<br>52<br>53<br>54<br>55<br>56<br>57<br>58<br>59<br>60 | People with chronic hepatitis C and HIV                   | Antiviral treatment                           | Not applicable                      | 1. Mortality.<br>2. HRQoL.<br>3. Complications. |

|                                                                                                                                                                                                                                                                                                                                                             |                                                          |                                 |                                     |                                                 |
|-------------------------------------------------------------------------------------------------------------------------------------------------------------------------------------------------------------------------------------------------------------------------------------------------------------------------------------------------------------|----------------------------------------------------------|---------------------------------|-------------------------------------|-------------------------------------------------|
| 1<br>2<br>3<br>4<br>5<br>6<br>7<br>8<br>9<br>10<br>11<br>12<br>13<br>14<br>15<br>16<br>17<br>18<br>19<br>20<br>21<br>22<br>23<br>24<br>25<br>26<br>27<br>28<br>29<br>30<br>31<br>32<br>33<br>34<br>35<br>36<br>37<br>38<br>39<br>40<br>41<br>42<br>43<br>44<br>45<br>46<br>47<br>48<br>49<br>50<br>51<br>52<br>53<br>54<br>55<br>56<br>57<br>58<br>59<br>60 | People with chronic hepatitis C                          | Medicinal herbs                 | No intervention/other interventions | 1. Mortality.<br>2. HRQoL.<br>3. Complications. |
|                                                                                                                                                                                                                                                                                                                                                             | Pregnant women with Hepatitis B                          | Caesarean section               | Vaginal delivery                    | 1. Mortality.<br>2. HRQoL.<br>3. Complications. |
|                                                                                                                                                                                                                                                                                                                                                             | People with chronic hepatitis C with vasculitis          | Treatments                      | Not applicable                      | 1. Mortality.<br>2. HRQoL.<br>3. Complications. |
|                                                                                                                                                                                                                                                                                                                                                             | People with chronic hepatitis C                          | Staging of liver disease        | Not applicable                      | 1. Mortality.<br>2. HRQoL.<br>3. Complications. |
|                                                                                                                                                                                                                                                                                                                                                             | People with primary biliary cholangitis and osteoporosis | Biphosphonates                  | No intervention/other interventions | 1. Mortality.<br>2. HRQoL.<br>3. Complications. |
|                                                                                                                                                                                                                                                                                                                                                             | People with primary biliary cholangitis and osteoporosis | Hormonal replacement therapy    | No intervention/other interventions | 1. Mortality.<br>2. HRQoL.<br>3. Complications. |
|                                                                                                                                                                                                                                                                                                                                                             | People with bleeding oesophageal varices                 | People with portosystemic shunt | No intervention/other interventions | 1. Mortality.<br>2. HRQoL.<br>3. Complications. |
|                                                                                                                                                                                                                                                                                                                                                             | People with hepatorenal syndrome                         | Terlipressin                    | No intervention/other interventions | 1. Mortality.<br>2. HRQoL.<br>3. Complications. |

|                                                                |                                                                   |                                                |                                     |                                                 |
|----------------------------------------------------------------|-------------------------------------------------------------------|------------------------------------------------|-------------------------------------|-------------------------------------------------|
| 1<br>2<br>3<br>4<br>5<br>6<br>7<br>8<br>9                      | People with hepatorenal syndrome                                  | Transjugular intrahepatic portosystemic shunts | No intervention/other interventions | 1. Mortality.<br>2. HRQoL.<br>3. Complications. |
| 10<br>11<br>12<br>13<br>14<br>15<br>16                         | People undergoing common bile duct exploration                    | T-tube                                         | No T-tube                           | 1. Mortality.<br>2. HRQoL.<br>3. Complications. |
| 17<br>18<br>19<br>20<br>21<br>22<br>23                         | People with acute calculous cholecystitis (high risk)             | Percutaneous cholecystostomy                   | No intervention/other interventions | 1. Mortality.<br>2. HRQoL.<br>3. Complications. |
| 24<br>25<br>26<br>27<br>28<br>29                               | People undergoing liver resection                                 | Enhanced recovery protocols                    | Standard intervention               | 1. Mortality.<br>2. HRQoL.<br>3. Complications. |
| 30<br>31<br>32<br>33<br>34<br>35<br>36                         | People undergoing liver transplantation                           | Perfusion techniques in donor                  | Not applicable                      | 1. Mortality.<br>2. HRQoL.<br>3. Complications. |
| 37<br>38<br>39<br>40<br>41<br>42<br>43                         | People with gallstones                                            | Chinese herbs                                  | Not applicable                      | 1. Mortality.<br>2. HRQoL.<br>3. Complications. |
| 44<br>45<br>46<br>47<br>48<br>49                               | Pregnant women with cholestasis                                   | Interventions                                  | Not applicable                      | 1. Mortality.<br>2. HRQoL.<br>3. Complications. |
| 50<br>51<br>52<br>53<br>54<br>55<br>56<br>57<br>58<br>59<br>60 | New-borns and infants receiving parenteral nutrition and jaundice | Pharmacological interventions                  | Not applicable                      | 1. Mortality.<br>2. HRQoL.<br>3. Complications. |



|                                                                |                                                                   |                                        |                                     |                                                 |
|----------------------------------------------------------------|-------------------------------------------------------------------|----------------------------------------|-------------------------------------|-------------------------------------------------|
| 1<br>2<br>3<br>4<br>5<br>6<br>7<br>8<br>9                      | New-borns and infants receiving parenteral nutrition and jaundice | Alternate interventions                | Not applicable                      | 1. Mortality.<br>2. HRQoL.<br>3. Complications. |
| 10<br>11<br>12<br>13<br>14<br>15<br>16                         | People with sickle cell disease and intrahepatic cholestasis      | Interventions                          | Not applicable                      | 1. Mortality.<br>2. HRQoL.<br>3. Complications. |
| 17<br>18<br>19<br>20<br>21<br>22                               | People with liver disease with upper gastrointestinal bleeding    | Human recombinant activated factor VII | No intervention/other interventions | 1. Mortality.<br>2. HRQoL.<br>3. Complications. |
| 23<br>24<br>25<br>26<br>27<br>28<br>29                         | People with liver disease with upper gastrointestinal bleeding    | Vitamin K                              | No intervention/other interventions | 1. Mortality.<br>2. HRQoL.<br>3. Complications. |
| 30<br>31<br>32<br>33<br>34<br>35<br>36                         | People with liver disease with upper gastrointestinal bleeding    | Antifibrinolytic amino acids           | No intervention/other interventions | 1. Mortality.<br>2. HRQoL.<br>3. Complications. |
| 37<br>38<br>39<br>40<br>41<br>42<br>43                         | People with liver disease                                         | Antioxidant supplements                | No intervention                     | 1. Mortality.<br>2. HRQoL.<br>3. Complications. |
| 44<br>45<br>46<br>47<br>48<br>49                               | People with liver disease                                         | Vitamin D supplements                  | No intervention                     | 1. Mortality.<br>2. HRQoL.<br>3. Complications. |
| 50<br>51<br>52<br>53<br>54<br>55<br>56<br>57<br>58<br>59<br>60 | People with liver disease                                         | Lifestyle: Nutritional support         | Not applicable                      | 1. Mortality.<br>2. HRQoL.<br>3. Complications. |

|                                                                                                                      |                                                                                           |                                                                                 |                                                                                    |                                                 |
|----------------------------------------------------------------------------------------------------------------------|-------------------------------------------------------------------------------------------|---------------------------------------------------------------------------------|------------------------------------------------------------------------------------|-------------------------------------------------|
| 1<br>2<br>3<br>4<br>5<br>6<br>7<br>8<br>9<br>10<br>11                                                                | People with adverse events related to chemoarterial embolisation for primary liver cancer | Chinese herbs                                                                   | Not applicable                                                                     | 1. Mortality.<br>2. HRQoL.<br>3. Complications. |
| 12<br>13<br>14<br>15<br>16<br>17<br>18<br>19<br>20<br>21<br>22<br>23<br>24<br>25<br>26<br>27                         | People with uncomplicated hepatic hydatid cysts                                           | Percutaneous needle aspiration, injection, and re-aspiration with benzimidazole | Percutaneous needle aspiration, injection, and re-aspiration without benzimidazole | 1. Mortality.<br>2. HRQoL.<br>3. Complications. |
| 28<br>29<br>30<br>31<br>32<br>33<br>34                                                                               | People with gallbladder cancer                                                            | Chemotherapy                                                                    | Not applicable                                                                     | 1. Mortality.<br>2. HRQoL.<br>3. Complications. |
| 35<br>36<br>37<br>38<br>39<br>40                                                                                     | People with acute or acute-on-chronic liver failure                                       | Granulocyte-colony stimulating factor                                           | No intervention/other interventions                                                | 1. Mortality.<br>2. HRQoL.<br>3. Complications. |
| 41<br>42<br>43<br>44<br>45<br>46<br>47<br>48<br>49<br>50<br>51<br>52<br>53<br>54<br>55<br>56<br>57<br>58<br>59<br>60 | People with common bile duct stones                                                       | Early laparoscopic cholecystectomy following endoscopic sphincterotomy          | Delayed laparoscopic cholecystectomy following endoscopic sphincterotomy           | 1. Mortality.<br>2. HRQoL.<br>3. Complications. |

|                                                                                                                                                                                                                                                                                                                                                             |                                                    |                                                |                                                 |                                                 |
|-------------------------------------------------------------------------------------------------------------------------------------------------------------------------------------------------------------------------------------------------------------------------------------------------------------------------------------------------------------|----------------------------------------------------|------------------------------------------------|-------------------------------------------------|-------------------------------------------------|
| 1<br>2<br>3<br>4<br>5<br>6<br>7<br>8<br>9<br>10<br>11<br>12<br>13<br>14<br>15<br>16<br>17<br>18<br>19<br>20<br>21<br>22<br>23<br>24<br>25<br>26<br>27<br>28<br>29<br>30<br>31<br>32<br>33<br>34<br>35<br>36<br>37<br>38<br>39<br>40<br>41<br>42<br>43<br>44<br>45<br>46<br>47<br>48<br>49<br>50<br>51<br>52<br>53<br>54<br>55<br>56<br>57<br>58<br>59<br>60 | People with gallstones and common-bile duct stones | Model of service delivery                      | Not applicable                                  | 1. Mortality.<br>2. HRQoL.<br>3. Complications. |
| People undergoing cholecystectomy                                                                                                                                                                                                                                                                                                                           | Routine intraoperative cholangiography             | selective cholangiography                      | 1. Mortality.<br>2. HRQoL.<br>3. Complications. |                                                 |
| People with gallstone pancreatitis                                                                                                                                                                                                                                                                                                                          | Early cholecystectomy                              | Delayed cholecystectomy                        | 1. Mortality.<br>2. HRQoL.<br>3. Complications. |                                                 |
| People at risk of gallstones                                                                                                                                                                                                                                                                                                                                | Non-pharmacological interventions                  | Not applicable                                 | 1. Mortality.<br>2. HRQoL.<br>3. Complications. |                                                 |
| People with biliary obstruction due to cholangiocarcinoma                                                                                                                                                                                                                                                                                                   | Endoscopic bipolar radiofrequency ablation         | Other interventions                            | 1. Mortality.<br>2. HRQoL.<br>3. Complications. |                                                 |
| People with colorectal liver metastases                                                                                                                                                                                                                                                                                                                     | Radiofrequency ablation                            | Other interventions                            | 1. Mortality.<br>2. HRQoL.<br>3. Complications. |                                                 |
| People with suspected bile leak                                                                                                                                                                                                                                                                                                                             | Magnetic resonance cholangiopancreatography        | Endoscopic retrograde cholangiopancreatography | 1. Mortality.<br>2. HRQoL.<br>3. Complications. |                                                 |
| People with cholangitis                                                                                                                                                                                                                                                                                                                                     | Antibiotics                                        | Not applicable                                 | 1. Mortality.<br>2. HRQoL.<br>3. Complications. |                                                 |

|                                                                                                                                                                                                                                                                                                                                                             |                                                     |                                                               |                |                                                 |
|-------------------------------------------------------------------------------------------------------------------------------------------------------------------------------------------------------------------------------------------------------------------------------------------------------------------------------------------------------------|-----------------------------------------------------|---------------------------------------------------------------|----------------|-------------------------------------------------|
| 1<br>2<br>3<br>4<br>5<br>6<br>7<br>8<br>9<br>10<br>11<br>12<br>13<br>14<br>15<br>16<br>17<br>18<br>19<br>20<br>21<br>22<br>23<br>24<br>25<br>26<br>27<br>28<br>29<br>30<br>31<br>32<br>33<br>34<br>35<br>36<br>37<br>38<br>39<br>40<br>41<br>42<br>43<br>44<br>45<br>46<br>47<br>48<br>49<br>50<br>51<br>52<br>53<br>54<br>55<br>56<br>57<br>58<br>59<br>60 | People with suspected focal liver lesions           | Imaging modalities to distinguish focal liver lesions         | Not applicable | 1. Mortality.<br>2. HRQoL.<br>3. Complications. |
|                                                                                                                                                                                                                                                                                                                                                             | People with liver cancer who have undergone surgery | Optimal follow-up regimen to detect early recurrence          | Not applicable | 1. Mortality.<br>2. HRQoL.<br>3. Complications. |
|                                                                                                                                                                                                                                                                                                                                                             | People undergoing laparoscopic cholecystectomy      | Evidence-based pain relief protocol                           | Standard care  | 1. Mortality.<br>2. HRQoL.<br>3. Complications. |
|                                                                                                                                                                                                                                                                                                                                                             | People undergoing liver and bile duct resection     | Evidence-based pain relief protocol                           | Standard care  | 1. Mortality.<br>2. HRQoL.<br>3. Complications. |
|                                                                                                                                                                                                                                                                                                                                                             | People with suspected gallbladder polyp             | Imaging modalities to confirm diagnosis of gallbladder polyp  | Not applicable | 1. Mortality.<br>2. HRQoL.<br>3. Complications. |
|                                                                                                                                                                                                                                                                                                                                                             | People with gallbladder polyp                       | Imaging modalities to distinguish nature of gallbladder polyp | Not applicable | 1. Mortality.<br>2. HRQoL.<br>3. Complications. |
|                                                                                                                                                                                                                                                                                                                                                             | People with suspected gallstones                    | Methods to confirm diagnosis of gallstone                     | Not applicable | 1. Mortality.<br>2. HRQoL.<br>3. Complications. |
|                                                                                                                                                                                                                                                                                                                                                             | People with suspected acute cholecystitis           | Methods to confirm diagnosis of acute cholecystitis           | Not applicable | 1. Mortality.<br>2. HRQoL.<br>3. Complications. |

|                                                                                                                                                                                                                                                                                                                                                             |                                                     |                                                  |                |                                                 |
|-------------------------------------------------------------------------------------------------------------------------------------------------------------------------------------------------------------------------------------------------------------------------------------------------------------------------------------------------------------|-----------------------------------------------------|--------------------------------------------------|----------------|-------------------------------------------------|
| 1<br>2<br>3<br>4<br>5<br>6<br>7<br>8<br>9<br>10<br>11<br>12<br>13<br>14<br>15<br>16<br>17<br>18<br>19<br>20<br>21<br>22<br>23<br>24<br>25<br>26<br>27<br>28<br>29<br>30<br>31<br>32<br>33<br>34<br>35<br>36<br>37<br>38<br>39<br>40<br>41<br>42<br>43<br>44<br>45<br>46<br>47<br>48<br>49<br>50<br>51<br>52<br>53<br>54<br>55<br>56<br>57<br>58<br>59<br>60 | People with suspected gallbladder dyskinesia        | Methods to confirm gallbladder dyskinesia        | Not applicable | 1. Mortality.<br>2. HRQoL.<br>3. Complications. |
|                                                                                                                                                                                                                                                                                                                                                             | People with suspected Sphincter of Oddi dysfunction | Methods to confirm Sphincter of Oddi dysfunction | Not applicable | 1. Mortality.<br>2. HRQoL.<br>3. Complications. |
|                                                                                                                                                                                                                                                                                                                                                             | People at risk of gallstones                        | Motivational interviewing for lifestyle changes  | standard care  | 1. Mortality.<br>2. HRQoL.<br>3. Complications. |
|                                                                                                                                                                                                                                                                                                                                                             | People with gallstones                              | Motivational interviewing for lifestyle changes  | standard care  | 1. Mortality.<br>2. HRQoL.<br>3. Complications. |
|                                                                                                                                                                                                                                                                                                                                                             | People at risk of NAFLD                             | Motivational interviewing for lifestyle changes  | standard care  | 1. Mortality.<br>2. HRQoL.<br>3. Complications. |
|                                                                                                                                                                                                                                                                                                                                                             | People with NAFLD                                   | Motivational interviewing for lifestyle changes  | standard care  | 1. Mortality.<br>2. HRQoL.<br>3. Complications. |
|                                                                                                                                                                                                                                                                                                                                                             | People undergoing liver resection for liver cancer  | Imaging modalities to confirm resectability      | Not applicable | 1. Mortality.<br>2. HRQoL.<br>3. Complications. |
|                                                                                                                                                                                                                                                                                                                                                             | People undergoing surgery for biliary tract cancer  | Imaging modalities to confirm resectability      | Not applicable | 1. Mortality.<br>2. HRQoL.<br>3. Complications. |

|                                                                                                                                                                                                                                                                                                                                                             |                                                               |                                             |                                                 |                                                 |
|-------------------------------------------------------------------------------------------------------------------------------------------------------------------------------------------------------------------------------------------------------------------------------------------------------------------------------------------------------------|---------------------------------------------------------------|---------------------------------------------|-------------------------------------------------|-------------------------------------------------|
| 1<br>2<br>3<br>4<br>5<br>6<br>7<br>8<br>9<br>10<br>11<br>12<br>13<br>14<br>15<br>16<br>17<br>18<br>19<br>20<br>21<br>22<br>23<br>24<br>25<br>26<br>27<br>28<br>29<br>30<br>31<br>32<br>33<br>34<br>35<br>36<br>37<br>38<br>39<br>40<br>41<br>42<br>43<br>44<br>45<br>46<br>47<br>48<br>49<br>50<br>51<br>52<br>53<br>54<br>55<br>56<br>57<br>58<br>59<br>60 | People undergoing liver resection                             | Imaging modalities to confirm resectability | Not applicable                                  | 1. Mortality.<br>2. HRQoL.<br>3. Complications. |
| People undergoing liver transplantation for hepatocellular carcinoma                                                                                                                                                                                                                                                                                        | Imaging modalities to confirm that cancer is limited to liver | Not applicable                              | 1. Mortality.<br>2. HRQoL.<br>3. Complications. |                                                 |
| People undergoing liver transplantation for hepatocellular carcinoma                                                                                                                                                                                                                                                                                        | Bridging ablative therapies                                   | Standard care                               | 1. Mortality.<br>2. HRQoL.<br>3. Complications. |                                                 |
| People undergoing liver transplantation for hepatocellular carcinoma                                                                                                                                                                                                                                                                                        | Goal-directed therapy                                         | Standard care                               | 1. Mortality.<br>2. HRQoL.<br>3. Complications. |                                                 |
| People with gallstones                                                                                                                                                                                                                                                                                                                                      | Direct access surgery (without seeing a specialist)           | Standard care                               | 1. Mortality.<br>2. HRQoL.<br>3. Complications. |                                                 |
| People with benign liver and gallbladder conditions                                                                                                                                                                                                                                                                                                         | Nurse-led care                                                | Standard care                               | 1. Mortality.<br>2. HRQoL.<br>3. Complications. |                                                 |
| People with sphincter of oddi dysfunction                                                                                                                                                                                                                                                                                                                   | Pharmacological interventions                                 | Standard care                               | 1. Mortality.<br>2. HRQoL.<br>3. Complications. |                                                 |
| People with sphincter of oddi dysfunction                                                                                                                                                                                                                                                                                                                   | Psychological counselling                                     | Standard care                               | 1. Mortality.<br>2. HRQoL.<br>3. Complications. |                                                 |

|                                                                |                                             |                                                            |                |                                                                     |
|----------------------------------------------------------------|---------------------------------------------|------------------------------------------------------------|----------------|---------------------------------------------------------------------|
| 1<br>2<br>3<br>4<br>5<br>6<br>7<br>8<br>9                      | People with biliary stricture               | Different diagnostic tests                                 | Not applicable | 1. Mortality.<br>2. HRQoL.<br>3. Complications.                     |
| 10<br>11<br>12<br>13<br>14<br>15<br>16                         | People with gallstones                      | Routine magnetic resonance cholangio pancreatography       | Standard care  | 1. Mortality.<br>2. HRQoL.<br>3. Complications.                     |
| 17<br>18<br>19<br>20<br>21<br>22<br>23<br>24<br>25<br>26<br>27 | People with liver and gallbladder disorders | Methods to improve understanding of evidence               | Not applicable | 1. Improved knowledge.<br>2. Better involvement in decision making. |
| 28<br>29<br>30<br>31<br>32<br>33<br>34                         | People undergoing liver transplantation     | Routine fat-assessment in donor livers                     | Standard care  | 1. Mortality.<br>2. HRQoL.<br>3. Complications.                     |
| 35<br>36<br>37<br>38<br>39<br>40                               | People with NAFLD and obesity               | Routine anti-obesity surgery                               | Standard care  | 1. Mortality.<br>2. HRQoL.<br>3. Complications.                     |
| 41<br>42<br>43<br>44<br>45<br>46<br>47<br>48<br>49             | People with severe polycystic liver disease | Pharmacological interventions to improve functional volume | Standard care  | 1. Mortality.<br>2. HRQoL.<br>3. Complications.                     |
| 50<br>51<br>52<br>53<br>54<br>55<br>56<br>57<br>58<br>59<br>60 | People with liver disease                   | Interventions to achieve palliation                        | Not applicable | 1. Palliation.                                                      |

|                                                    |                                                                                  |                                                           |                 |                                                                   |
|----------------------------------------------------|----------------------------------------------------------------------------------|-----------------------------------------------------------|-----------------|-------------------------------------------------------------------|
| 1<br>2<br>3<br>4<br>5<br>6<br>7<br>8<br>9          | People with liver disease                                                        | Interventions to achieve symptom control                  | Not applicable  | Symptom control                                                   |
| 10<br>11<br>12<br>13                               | People with liver disease                                                        | Interventions to improve quality of life                  | Not applicable  | Quality of life                                                   |
| 14<br>15<br>16<br>17<br>18<br>19<br>20<br>21<br>22 | Healthcare professionals dealing with people with primary sclerosing cholangitis | Education of healthcare professionals about liver disease | Standard care   | 1. Early recognition.<br>2. Appropriate treatment.                |
| 23<br>24<br>25<br>26<br>27<br>28<br>29             | People with Crohn's disease                                                      | Methods for screening for primary sclerosing cholangitis  | Not applicable  | Diagnosis of primary sclerosing cholangitis                       |
| 30<br>31<br>32<br>33<br>34                         | People with NAFLD                                                                | Patient education                                         | Standard care   | 1. Greater knowledge.                                             |
| 35<br>36<br>37<br>38<br>39<br>40<br>41<br>42<br>43 | Healthcare professionals dealing with people with polycystic liver disease       | Education of healthcare professionals about liver disease | Standard care   | 1. Early recognition.<br>2. Appropriate treatment.                |
| 44<br>45<br>46<br>47<br>48<br>49<br>50<br>51<br>52 | People with polycystic liver disease                                             | Early liver transplantation                               | Standard care   | 1. Quality of life.<br>2. Reducing symptoms.<br>3. Reducing pain. |
| 53<br>54<br>55<br>56<br>57<br>58<br>59<br>60       | People with autoimmune hepatitis                                                 | Interventions that affect T cells                         | No intervention | 1. Cure.<br>2. Improve quality of life                            |



|                                                                                                                                                                                                                                                                                                                                                             |                                         |                                                         |                |                                                                                                                  |
|-------------------------------------------------------------------------------------------------------------------------------------------------------------------------------------------------------------------------------------------------------------------------------------------------------------------------------------------------------------|-----------------------------------------|---------------------------------------------------------|----------------|------------------------------------------------------------------------------------------------------------------|
| 1<br>2<br>3<br>4<br>5<br>6<br>7<br>8<br>9<br>10<br>11<br>12<br>13<br>14<br>15<br>16<br>17<br>18<br>19<br>20<br>21<br>22<br>23<br>24<br>25<br>26<br>27<br>28<br>29<br>30<br>31<br>32<br>33<br>34<br>35<br>36<br>37<br>38<br>39<br>40<br>41<br>42<br>43<br>44<br>45<br>46<br>47<br>48<br>49<br>50<br>51<br>52<br>53<br>54<br>55<br>56<br>57<br>58<br>59<br>60 | People at risk of liver disease         | Screening                                               | Not applicable | Early diagnosis and treatment                                                                                    |
|                                                                                                                                                                                                                                                                                                                                                             | People with polycystic liver disease    | Monitoring polycystic liver disease                     | Not applicable |                                                                                                                  |
|                                                                                                                                                                                                                                                                                                                                                             | People with polycystic kidney disease   | Diagnosis polycystic liver disease                      | Not applicable |                                                                                                                  |
|                                                                                                                                                                                                                                                                                                                                                             | People with liver disease               | Methods to improve early appropriate treatment          | Not applicable | Early diagnosis and treatment                                                                                    |
|                                                                                                                                                                                                                                                                                                                                                             | People with polycystic kidney disease   | Methods to prevent symptomatic polycystic liver disease | Not applicable | 1. Quality of life.<br>2. Liver function.                                                                        |
|                                                                                                                                                                                                                                                                                                                                                             | People undergoing liver transplantation | Various treatments                                      | Not applicable | 1. Survival<br>2. Complications<br>3. QoL<br>4. Hospital stay<br>5. Return to work<br>6. Improvement of symptoms |
|                                                                                                                                                                                                                                                                                                                                                             | People with polycystic liver disease    | Diet (specifically soy proteins which contain oestrogen | Standard diet  | 1. Decrease size of cyst or preventing cysts to enlarge.<br>2. Decrease symptoms                                 |

|                                                                                                                                                          |                                                                                     |                                                                    |                     |                                                                                                     |
|----------------------------------------------------------------------------------------------------------------------------------------------------------|-------------------------------------------------------------------------------------|--------------------------------------------------------------------|---------------------|-----------------------------------------------------------------------------------------------------|
| 1<br>2<br>3<br>4<br>5<br>6<br>7<br>8<br>9<br>10<br>11                                                                                                    | People with NAFLD                                                                   | Various treatments                                                 | Not applicable      | 1. Impact on health<br>(no further details)<br>2. Progression to<br>liver failure                   |
| 12<br>13<br>14<br>15<br>16                                                                                                                               | People with suspected<br>NAFLD                                                      | Diagnosis                                                          | Not applicable      | 1. Early diagnosis                                                                                  |
| 17<br>18<br>19<br>20<br>21<br>22<br>23<br>24<br>25<br>26<br>27<br>28<br>29<br>30<br>31<br>32<br>33<br>34                                                 | People with gallstones                                                              | Various treatments                                                 | Not applicable      | 1. Impact on health<br>(no further details)                                                         |
| 35<br>36<br>37<br>38<br>39<br>40<br>41<br>42<br>43<br>44<br>45<br>46<br>47<br>48<br>49<br>50<br>51<br>52<br>53<br>54<br>55<br>56<br>57<br>58<br>59<br>60 | People with polycystic liver<br>disease                                             | Genetic treatments                                                 | Standard<br>therapy | 1. Reduce symptoms.<br>2. Decrease<br>occurrence and size<br>of cysts.<br>3. Increased<br>longevity |
|                                                                                                                                                          | Healthcare professionals<br>dealing with people with<br>primary biliary cholangitis | Education of<br>healthcare<br>professionals about<br>liver disease | Standard care       | 1. Early recognition.<br>2. Appropriate<br>treatment.                                               |
|                                                                                                                                                          | People undergoing<br>treatment for ulcerative<br>colitis                            | Various treatments                                                 | Not applicable      | 1. Adverse events<br>related to liver                                                               |
|                                                                                                                                                          | People with<br>cholangiocarcinoma                                                   | Liver transplantation                                              | Standard<br>therapy | 1. Survival<br>2. Complications<br>3. QoL                                                           |

|                                              |                                                                                    |                       |                                                                                    |
|----------------------------------------------|------------------------------------------------------------------------------------|-----------------------|------------------------------------------------------------------------------------|
|                                              |                                                                                    |                       | 4. Hospital stay<br>5. Return to work                                              |
| People undergoing liver transplantation      | Machine perfusion of donor organ                                                   | Cold storage          | 1. Survival<br>2. Complications<br>3. QoL<br>4. Hospital stay<br>5. Return to work |
| People with liver cancer                     | Novel treatments (irreversible electroporation, high intensity focused ultrasound) |                       | 1. Survival<br>2. Complications<br>3. QoL<br>4. Hospital stay<br>5. Return to work |
| People with hepatocellular carcinoma         | Liver resection                                                                    | Liver transplantation | 1. Survival<br>2. Complications<br>3. QoL<br>4. Hospital stay<br>5. Return to work |
| People with colorectal liver metastases      | Ablation                                                                           | Surgery               | 1. Survival<br>2. Complications<br>3. QoL<br>4. Hospital stay<br>5. Return to work |
| People with liver disease undergoing surgery | Ischaemic preconditioning                                                          | No IPC                | 1. Survival<br>2. Complications<br>3. QoL                                          |

|                                                     |                                       |                             |                                                                                                                                                  |
|-----------------------------------------------------|---------------------------------------|-----------------------------|--------------------------------------------------------------------------------------------------------------------------------------------------|
|                                                     |                                       |                             | 4. Hospital stay<br>5. Return to work                                                                                                            |
| People with liver disease<br>undergoing surgery     | Remote ischaemic<br>preconditioning   | No RIPC                     | 1. Survival<br>2. Complications<br>3. QoL<br>4. Hospital stay<br>5. Return to work                                                               |
| People with liver disease<br>undergoing surgery     | Goal-directed therapy                 | standard fluid<br>treatment | 1. Survival<br>2. Complications<br>3. QoL<br>4. Hospital stay<br>5. Return to work                                                               |
| People with compensated<br>liver cirrhosis          | Treatments (in<br>particular statins) | Other<br>interventions      | 1. Decompensation<br>2. Survival<br>3. Side effects<br>4. Quality of life.                                                                       |
| People with chronic liver<br>disease/ liver failure | Stem cell therapy                     | Standard<br>therapy         | 1. Graft and patient<br>survival<br>2. QoL.<br>3. Morbidity<br>compared to<br>conventional<br>transplantation<br>4. Patient reported<br>outcomes |

|                                                                                        |                                     |                |                           |
|----------------------------------------------------------------------------------------|-------------------------------------|----------------|---------------------------|
| People with Wilson's disease<br>(and other rare non-alcohol<br>liver related diseases) | Various treatments                  | Not applicable | Not stated                |
| People with suspected<br>autoimmune hepatitis                                          | Diagnosis of<br>autoimmune diseases | Not applicable | 1. Costs of<br>management |

## Appendix 2 List of unanswered research questions ('uncertainties') prioritised during the interim prioritisation

1. What are the best treatments that cure or delay the progression (worsening) of primary sclerosing cholangitis (PSC)?
2. Should all people above 40 years of age or those considered to be at risk of liver disease (because of family history of liver disease or because of their lifestyle) be tested for the presence of liver disease to identify liver diseases at an early stage?
3. Should people with primary sclerosing cholangitis (PSC) undergo screening (tested routinely) for cancer?
4. Are there any treatments that reverse the liver damage in primary sclerosing cholangitis (PSC)?
5. What are the best treatments that cure or delay the progression (worsening) of non-alcohol-related fatty liver disease (NAFLD)?
6. What are the best symptomatic treatments for itching in people with primary sclerosing cholangitis (PSC)?
7. Are there alternatives to invasive assessment of oesophageal varices in people with chronic liver disease?

- 1
- 2
- 3 8. Does vitamin D supplementation (adding Vitamin D in food or providing it in tablet form)
- 4
- 5 increase the lifespan, health-related quality of life, and decrease complications in people
- 6
- 7 with liver disease?
- 8
- 9
- 10 9. Should new methods to improve the understanding of evidence be developed for people
- 11
- 12 with liver and gallbladder diseases?
- 13
- 14 10. What is the best treatment for people with early or very early hepatocellular carcinoma
- 15
- 16 (HCC)?
- 17
- 18 11. Should the methods used to assess nutrition of patients in liver disease be standardised?
- 19
- 20 12. Does dieting improve liver function and decrease the requirement for liver transplantation in
- 21
- 22 obese people?
- 23
- 24 13. Should general public be educated about non-alcohol-related fatty liver disease (NAFLD)
- 25
- 26 with an aim to reduce the numbers of those that have it?
- 27
- 28 14. What are the best symptomatic treatments for itching in people with chronic liver diseases
- 29
- 30 other than primary sclerosing cholangitis (PSC) and primary biliary cholangitis (PBC)?
- 31
- 32 15. Do treatments targeted against deformation of bile duct (biliary stricture or narrowing of
- 33
- 34 bile duct due to the illness) work better than other treatments in people with primary
- 35
- 36 sclerosing cholangitis (PSC)?
- 37
- 38 16. What are the treatments available to decrease weight in overweight people with non-
- 39
- 40 alcohol-related fatty liver disease (NAFLD)?
- 41
- 42 17. What are the best treatments that cure or delay the progression (worsening) of non-alcohol
- 43
- 44 related steatohepatitis (NASH)?
- 45
- 46 18. Do statins (or other treatments) delay liver failure in people with advanced liver disease?
- 47
- 48 19. What are the best treatments that provide temporary symptom relief in people with
- 49
- 50 advanced liver disease?
- 51
- 52 20. Which is the most suitable antibiotic (or combination of antibiotics) in people with
- 53
- 54 cholangitis (biliary infection)?
- 55
- 56
- 57
- 58
- 59
- 60

- 1  
2  
3 21. What are the best treatments that cure or delay the progression (worsening) of autoimmune  
4 hepatitis (AIH)?  
5  
6
- 7  
8 22. Are there any methods other than liver biopsy (obtaining a piece of liver, usually using a  
9  
10  
11  
12  
13  
14  
15  
16  
17  
18  
19  
20  
21  
22  
23  
24  
25  
26  
27  
28  
29  
30  
31  
32  
33  
34  
35  
36  
37  
38  
39  
40  
41  
42  
43  
44  
45  
46  
47  
48  
49  
50  
51  
52  
53  
54  
55  
56  
57  
58  
59  
60  
23. What are the best nutritional interventions in people undergoing liver transplantation?  
24. What are the best symptomatic treatments for fatigue (tiredness), joint pain, and other  
symptoms in people with people with autoimmune hepatitis (AIH)?  
25. Prior to liver transplantation, is it better to transport the donor liver using a machine which  
pumps blood or preservation solution through the liver (machine perfusion) or is it better to  
transport it in the standard way of transporting it immersed in cold preservation solution  
(cold storage)?  
26. What are the best treatments that cure or delay the progression (worsening) of chronic  
hepatitis C virus (HCV) infection?  
27. Does education of people with liver disease about the natural course and treatment of liver  
disease improve the patient knowledge, patient responsibility, and decrease hospital visits?  
28. What are the best treatments that cure or delay the progression (worsening) of primary  
biliary cholangitis (PBC)?  
29. Is nurse-led care as effective or better than doctor-led care for non-alcohol related fatty liver  
disease (NAFLD)?  
30. Is treatment targeted against deformation of bile duct (biliary stricture or narrowing of bile  
duct due to cancer) better than standard treatment for people with bile duct cancer?  
31. Is surgery (in the form of removal of gallbladder) required in people with gallstones?  
32. Should people with non-alcohol-related fatty liver disease (NAFLD) and non-alcohol-related  
steatohepatitis (NASH) receive additional education about the condition?  
33. What is the best immunosuppressive regimen in adults undergoing liver transplantation?

- 1
  - 2
  - 3
  - 4
  - 5
  - 6
  - 7
  - 8
  - 9
  - 10
  - 11
  - 12
  - 13
  - 14
  - 15
  - 16
  - 17
  - 18
  - 19
  - 20
  - 21
  - 22
  - 23
  - 24
  - 25
  - 26
  - 27
  - 28
  - 29
  - 30
  - 31
  - 32
  - 33
  - 34
  - 35
  - 36
  - 37
  - 38
  - 39
  - 40
  - 41
  - 42
  - 43
  - 44
  - 45
  - 46
  - 47
  - 48
  - 49
  - 50
  - 51
  - 52
  - 53
  - 54
  - 55
  - 56
  - 57
  - 58
  - 59
  - 60
34. Is endoscopic ultrasound (EUS) (using a ultrasound attached to the end of an endoscope) or magnetic resonance cholangiopancreatography (MRCP, a form of MRI scan) better in the diagnosis of common bile duct (CBD) stones?
35. How can we improve compliance to treatment (adherence to treatment or the degree to which a patient correctly follows medical advice) in people with liver disease?
36. What are the best symptomatic treatments for relief of ulcerative colitis (UC) in people with primary sclerosing cholangitis (PSC) who have undergone liver transplantation?
37. What are the best symptomatic treatments for itching and fatigue (tiredness) in people with primary biliary cholangitis (PBC)?
38. Does education of people with asymptomatic (absence of symptoms) liver disease result in change of life style and cure/delay the progression (worsening) of liver disease?
39. What are the best treatments that are available for the treatment of pregnant women with cholestasis (condition where bile flow from the liver is obstructed)?
40. Is transarterial chemoembolisation (TACE) or transarterial embolisation (TAE) (blocking the blood supply to cancer with or without chemotherapy drugs) effective in the treatment of people with liver metastases?
41. Should people with liver metastases (cancer spread to the liver) from neuroendocrine cancer (a form of cancer that arises from cells that secrete hormones and nervous system) undergo liver resection?
42. What are the best methods available to decrease blood loss during liver resection?
43. What are the best treatments that cure or delay the progression (worsening) of chronic hepatitis B virus (HBV) infection?
44. What are the best treatments for people with polycystic liver disease?
45. Should the healthcare professionals dealing with childhood liver diseases be provided additional education about childhood liver diseases compared to standard education where childhood diseases are learnt as part of overall education?



- 1  
2  
3 46. What is the best immunosuppressive regimen in children undergoing liver transplantation?  
4  
5  
6 47. Should blood vessels supplying the liver be temporarily blocked in people undergoing liver  
7  
8 resection? If so, what is the best way of performing this?  
9  
10 48. What is the best treatment that should be given to people who undergo liver transplantation  
11  
12 for chronic hepatitis B virus (HBV) infection to prevent reinfection with chronic hepatitis B  
13  
14 virus (HBV) infection?  
15  
16  
17  
18  
19  
20  
21  
22  
23  
24  
25  
26  
27  
28  
29  
30  
31  
32  
33  
34  
35  
36  
37  
38  
39  
40  
41  
42  
43  
44  
45  
46  
47  
48  
49  
50  
51  
52  
53  
54  
55  
56  
57  
58  
59  
60

For peer review only

Appendix 3 Next step to address the top 10 uncertainty based on current best evidence (detailed)

| Treatment uncertainty<br>(Research question)                                                   | High-quality<br>systematic review <sup>a</sup> | Research<br>recommendations of<br>systematic review                                                                                                                                                             | RCTs not included in<br>the systematic<br>review <sup>a,b,c</sup>                                                    | Patient-oriented<br>outcomes assessed in<br>trials not included in<br>the systematic review <sup>d</sup> | Next step                                                                                                                                 |
|------------------------------------------------------------------------------------------------|------------------------------------------------|-----------------------------------------------------------------------------------------------------------------------------------------------------------------------------------------------------------------|----------------------------------------------------------------------------------------------------------------------|----------------------------------------------------------------------------------------------------------|-------------------------------------------------------------------------------------------------------------------------------------------|
| What is the best treatment for people with early or very early hepatocellular carcinoma (HCC)? | [1]                                            | High-quality RCTs designed to assess clinically important differences in all-cause mortality and health-related quality of life, and having an adequate follow-up period (approximately five years) are needed. | NCT02169765<br>NCT02704130<br>NCT02728193<br>NCT02243384<br>NCT00844454<br>NCT01918683<br>NCT01570075<br>NCT01351194 | Survival (7 trials),<br>recurrence (5 trials),<br>morbidity (3 trials)                                   | High-quality RCTs of interventions not covered in ongoing trials and comparison of health-related quality (HRQoL) in different treatments |

|                                                                                                                                                                                                                                                                                                                                  |                                                          |                                                                                                                                                                                                                                                                     |                                                                                                                                                    |                                                                           |                                                                                                |
|----------------------------------------------------------------------------------------------------------------------------------------------------------------------------------------------------------------------------------------------------------------------------------------------------------------------------------|----------------------------------------------------------|---------------------------------------------------------------------------------------------------------------------------------------------------------------------------------------------------------------------------------------------------------------------|----------------------------------------------------------------------------------------------------------------------------------------------------|---------------------------------------------------------------------------|------------------------------------------------------------------------------------------------|
| <p>1<br/>2<br/>3<br/>4<br/>5<br/>6<br/>7<br/>8<br/>9<br/>10<br/>11<br/>12<br/>13<br/>14<br/>15<br/>16<br/>17<br/>18<br/>19<br/>20<br/>21<br/>22<br/>23<br/>24<br/>25<br/>26<br/>27<br/>28<br/>29</p> <p>What are the best treatments that cure or delay the progression (worsening) of primary sclerosing cholangitis (PSC)?</p> | <p>[2]</p>                                               | <p>An urgent need exists to identify an effective medical treatment for primary sclerosing cholangitis through well-designed RCTs with adequate follow-up that aim to identify differences in outcomes important to people with primary sclerosing cholangitis.</p> | <p>NCT03394781<br/>NCT02605213<br/>NCT02943460<br/>NCT02704364<br/>NCT01688024<br/>NCT02177136<br/>NCT01672853<br/>NCT03035058<br/>NCT03333928</p> | <p>None of the trials include survival, HRQoL as outcomes<sup>e</sup></p> | <p>High-quality RCTs with clinical outcomes</p>                                                |
| <p>30<br/>31<br/>32<br/>33<br/>34<br/>35<br/>36<br/>37<br/>38<br/>39<br/>40<br/>41<br/>42<br/>43<br/>44<br/>45<br/>46</p> <p>What are the best treatments that cure or delay the progression (worsening) of non-</p>                                                                                                             | <p>[3] (includes only pharmacological interventions)</p> | <p>Further well-designed randomised clinical trials with sufficiently</p>                                                                                                                                                                                           | <p>More than 10 published trials on lifestyle interventions and more than 20 trials</p>                                                            | <p>Lifestyle interventions and nutritional supplementation</p>            | <p>High-quality systematic reviews on lifestyle interventions (one review) and nutritional</p> |

1  
2  
3  
4  
5  
6  
7  
8  
9  
10  
11  
12  
13  
14  
15  
16  
17  
18  
19  
20  
21  
22  
23  
24  
25  
26  
27  
28  
29  
30  
31  
32  
33  
34  
35  
36  
37  
38  
39  
40  
41  
42  
43  
44  
45  
46

|                                                     |  |                                          |                                                                                                                                                                                                                                                                                               |                                                                                                                                                                                                                                                                                                       |                                                                                                                                                |
|-----------------------------------------------------|--|------------------------------------------|-----------------------------------------------------------------------------------------------------------------------------------------------------------------------------------------------------------------------------------------------------------------------------------------------|-------------------------------------------------------------------------------------------------------------------------------------------------------------------------------------------------------------------------------------------------------------------------------------------------------|------------------------------------------------------------------------------------------------------------------------------------------------|
| <p>alcohol-related fatty liver disease (NAFLD)?</p> |  | <p>large sample sizes are necessary.</p> | <p>on nutritional supplementation with no recent high-quality systematic reviews<br/><u>Pharmacological interventions</u><br/>NCT02605616<br/>NCT01002547<br/>NCT02927314<br/>NCT03291249<br/>NCT03166735<br/>NCT03486899<br/>NCT03061721<br/>NCT02784444<br/>NCT02077374<br/>NCT03486912</p> | <p>Not applicable as there are no high quality systematic reviews<br/><u>Pharmacological interventions</u><br/>Health-related quality of life (2 trials), resolution of fatty liver disease (11 trials), mortality (2 trials), cirrhosis (2 trials), cardiovascular events (2 trials)<sup>e</sup></p> | <p>supplementation to cure or delay the progression of NAFLD and high-quality RCTs on pharmacological interventions with clinical outcomes</p> |
|-----------------------------------------------------|--|------------------------------------------|-----------------------------------------------------------------------------------------------------------------------------------------------------------------------------------------------------------------------------------------------------------------------------------------------|-------------------------------------------------------------------------------------------------------------------------------------------------------------------------------------------------------------------------------------------------------------------------------------------------------|------------------------------------------------------------------------------------------------------------------------------------------------|

|  |  |  |             |  |  |
|--|--|--|-------------|--|--|
|  |  |  | NCT02854605 |  |  |
|  |  |  | NCT01963845 |  |  |
|  |  |  | NCT03437720 |  |  |
|  |  |  | NCT02684591 |  |  |
|  |  |  | NCT02787304 |  |  |
|  |  |  | NCT02466516 |  |  |
|  |  |  | NCT02633956 |  |  |
|  |  |  | NCT03008070 |  |  |
|  |  |  | NCT03205150 |  |  |
|  |  |  | NCT02923154 |  |  |
|  |  |  | NCT02913105 |  |  |
|  |  |  | NCT01899859 |  |  |
|  |  |  | NCT02548351 |  |  |
|  |  |  | NCT03053063 |  |  |
|  |  |  | NCT03053050 |  |  |
|  |  |  | NCT02413372 |  |  |

1  
2  
3  
4  
5  
6  
7  
8  
9  
10  
11  
12  
13  
14  
15  
16  
17  
18  
19  
20  
21  
22  
23  
24  
25  
26  
27  
28  
29  
30  
31  
32  
33  
34  
35  
36  
37  
38  
39  
40  
41  
42  
43  
44  
45  
46

|  |  |  |             |  |  |
|--|--|--|-------------|--|--|
|  |  |  | NCT02443116 |  |  |
|  |  |  | NCT01464801 |  |  |
|  |  |  | NCT03449446 |  |  |
|  |  |  | NCT02912260 |  |  |
|  |  |  | NCT02856555 |  |  |
|  |  |  | NCT02704403 |  |  |
|  |  |  | NCT01617772 |  |  |
|  |  |  | NCT02217475 |  |  |
|  |  |  | NCT01406704 |  |  |
|  |  |  | NCT03248882 |  |  |
|  |  |  | NCT01051219 |  |  |
|  |  |  | NCT02316717 |  |  |
|  |  |  | NCT02970942 |  |  |
|  |  |  | NCT03439254 |  |  |
|  |  |  | NCT02574325 |  |  |
|  |  |  | NCT01703260 |  |  |

|                                                                                                                                                                                                                                                                                                                                                                                                                           |                                                        |                                                                                                                                                                                                                                                                                                      |                                                                                                                                                                                                        |                                                                                                                                                                                                                                                                                 |                                                                                                                                                                      |
|---------------------------------------------------------------------------------------------------------------------------------------------------------------------------------------------------------------------------------------------------------------------------------------------------------------------------------------------------------------------------------------------------------------------------|--------------------------------------------------------|------------------------------------------------------------------------------------------------------------------------------------------------------------------------------------------------------------------------------------------------------------------------------------------------------|--------------------------------------------------------------------------------------------------------------------------------------------------------------------------------------------------------|---------------------------------------------------------------------------------------------------------------------------------------------------------------------------------------------------------------------------------------------------------------------------------|----------------------------------------------------------------------------------------------------------------------------------------------------------------------|
|                                                                                                                                                                                                                                                                                                                                                                                                                           |                                                        |                                                                                                                                                                                                                                                                                                      | NCT01260246                                                                                                                                                                                            |                                                                                                                                                                                                                                                                                 |                                                                                                                                                                      |
|                                                                                                                                                                                                                                                                                                                                                                                                                           |                                                        |                                                                                                                                                                                                                                                                                                      | NCT02960204                                                                                                                                                                                            |                                                                                                                                                                                                                                                                                 |                                                                                                                                                                      |
| <p>1<br/>2<br/>3<br/>4<br/>5<br/>6<br/>7<br/>8<br/>9<br/>10<br/>11<br/>12<br/>13<br/>14<br/>15<br/>16<br/>17<br/>18<br/>19<br/>20<br/>21<br/>22<br/>23<br/>24<br/>25<br/>26<br/>27<br/>28<br/>29<br/>30<br/>31<br/>32<br/>33<br/>34<br/>35<br/>36<br/>37<br/>38<br/>39<br/>40<br/>41<br/>42<br/>43<br/>44<br/>45<br/>46</p> <p>What is the best immunosuppressive regimen in adults undergoing liver transplantation?</p> | <p>[4] (covers only maintenance immunosuppression)</p> | <p>Future randomised clinical trials should be adequately powered; performed in people who are generally seen in the clinic rather than in highly selected participants; employ blinding; avoid postrandomisation dropouts or planned cross-overs; and use clinically important outcomes such as</p> | <p><u>Induction immunosuppression</u></p> <p>More than 20 published trials</p> <p><u>Maintenance immunosuppression</u></p> <p>NCT01998789</p> <p>NCT01230502</p> <p>NCT02909335</p> <p>NCT00286871</p> | <p><u>Induction immunosuppression</u></p> <p>Not applicable as there is no high quality systematic review</p> <p><u>Maintenance immunosuppression</u></p> <p>Graft survival (1 trial)</p> <p>Adverse events (1 trial)</p> <p>Hepatocellular carcinoma (1 trial)<sup>e</sup></p> | <p>High-quality systematic review on induction immunosuppressive regimen and high-quality RCTs on maintenance immunosuppression with important clinical outcomes</p> |

1  
2  
3  
4  
5  
6  
7  
8  
9  
10  
11  
12  
13  
14  
15  
16  
17  
18  
19  
20  
21  
22  
23  
24  
25  
26  
27  
28  
29  
30  
31  
32  
33  
34  
35  
36  
37  
38  
39  
40  
41  
42  
43  
44  
45  
46

|                                                                   |      |                                                                                                                                                                                                                                                                                                                                             |      |   |                                                       |
|-------------------------------------------------------------------|------|---------------------------------------------------------------------------------------------------------------------------------------------------------------------------------------------------------------------------------------------------------------------------------------------------------------------------------------------|------|---|-------------------------------------------------------|
|                                                                   |      | <p>mortality, graft loss,<br/>renal impairment,<br/>chronic kidney disease,<br/>and retransplantation.</p> <p>Such trials should use<br/>tacrolimus as one of<br/>the control groups.</p> <p>Moreover, such trials<br/>ought to be designed<br/>in such a way as to<br/>ensure low risk of bias<br/>and low risks of<br/>random errors.</p> |      |   |                                                       |
| Should general public<br>be educated about<br>non-alcohol-related | None | -                                                                                                                                                                                                                                                                                                                                           | None | - | High-quality RCTs on<br>education to prevent<br>NAFLD |



|                                                                                                                   |      |   |                                                                                                                                                                                                                               |                                                                                 |                                                 |
|-------------------------------------------------------------------------------------------------------------------|------|---|-------------------------------------------------------------------------------------------------------------------------------------------------------------------------------------------------------------------------------|---------------------------------------------------------------------------------|-------------------------------------------------|
| <p>fatty liver disease (NAFLD) with an aim to reduce the numbers of those that have it?</p>                       |      |   |                                                                                                                                                                                                                               |                                                                                 |                                                 |
| <p>What are the best treatments that cure or delay the progression (worsening) of autoimmune hepatitis (AIH)?</p> | None | - | <p>[5-7]</p> <p>NCT02050646</p> <p>NCT02463331</p> <p>NCT00608894</p> <p>NCT02900443</p> <p>NCT02239562</p> <p>NCT01170351</p> <p>NCT03217422</p> <p>NCT01661842</p> <p>NCT00687180</p> <p>NCT01980745</p> <p>NCT02878863</p> | <p>Survival (1 trial), health-related quality of life (1 trial)<sup>e</sup></p> | <p>High quality RCTs with clinical outcomes</p> |

1  
2  
3  
4  
5  
6  
7  
8  
9  
10  
11  
12  
13  
14  
15  
16  
17  
18  
19  
20  
21  
22  
23  
24  
25  
26  
27  
28  
29  
30  
31  
32  
33  
34  
35  
36  
37  
38  
39  
40  
41  
42  
43  
44  
45  
46

|                                                                                                                                                                 |                                                                                                                                                      |   |                                                                         |                                                                                                   |                                                                                                                       |
|-----------------------------------------------------------------------------------------------------------------------------------------------------------------|------------------------------------------------------------------------------------------------------------------------------------------------------|---|-------------------------------------------------------------------------|---------------------------------------------------------------------------------------------------|-----------------------------------------------------------------------------------------------------------------------|
|                                                                                                                                                                 |                                                                                                                                                      |   | NCT02936596                                                             |                                                                                                   |                                                                                                                       |
| What are the best treatments that cure or delay the progression (worsening) of non-alcohol related steatohepatitis (NASH)?                                      | The evidence related to this question is covered under non-alcohol related fatty liver disease by performing a subgroup analysis of people with NASH |   |                                                                         |                                                                                                   |                                                                                                                       |
| Prior to liver transplantation, is it better to transport the donor liver using a machine which pumps blood or preservation solution through the liver (machine | None                                                                                                                                                 | - | NCT02775162<br>NCT03124641<br>NCT02940600<br>NCT02584283<br>NCT01317342 | Overall survival (4 trials), graft survival (5 trials), health-related quality of life (2 trials) | Await results of the RCTs (all expected to complete by the end of 2019) and perform a high quality systematic review. |

|                                                                                                                                                 |            |                                                                                                                                                                                            |                                                                                                                                                    |                                                                                             |                                                 |
|-------------------------------------------------------------------------------------------------------------------------------------------------|------------|--------------------------------------------------------------------------------------------------------------------------------------------------------------------------------------------|----------------------------------------------------------------------------------------------------------------------------------------------------|---------------------------------------------------------------------------------------------|-------------------------------------------------|
| <p>perfusion) or is it better to transport it in the standard way of transporting it immersed in cold preservation solution (cold storage)?</p> |            |                                                                                                                                                                                            |                                                                                                                                                    |                                                                                             |                                                 |
| <p>What are the best treatments that cure or delay the progression (worsening) of primary biliary cholangitis (PBC)?</p>                        | <p>[8]</p> | <p>Further well-designed randomised clinical trials are necessary. Future randomised clinical trials ought to be adequately powered; performed in people who are generally seen in the</p> | <p>NCT02937012<br/>NCT01473524<br/>NCT02823353<br/>NCT02135536<br/>NCT01614405<br/>NCT02609048<br/>NCT00746486<br/>NCT02955602<br/>NCT03226067</p> | <p>Health-related quality of life (5 trials), relief of symptoms (5 trials)<sup>e</sup></p> | <p>High-quality RCTs with clinical outcomes</p> |

1  
2  
3  
4  
5  
6  
7  
8  
9  
10  
11  
12  
13  
14  
15  
16  
17  
18  
19  
20  
21  
22  
23  
24  
25  
26  
27  
28  
29  
30  
31  
32  
33  
34  
35  
36  
37  
38  
39  
40  
41  
42  
43  
44  
45  
46

1  
2  
3  
4  
5  
6  
7  
8  
9  
10  
11  
12  
13  
14  
15  
16  
17  
18  
19  
20  
21  
22  
23  
24  
25  
26  
27  
28  
29  
30  
31  
32  
33  
34  
35  
36  
37  
38  
39  
40  
41  
42  
43  
44  
45  
46

|  |  |                          |             |  |  |
|--|--|--------------------------|-------------|--|--|
|  |  | clinic rather than in    | NCT03112681 |  |  |
|  |  | highly selected          | NCT01904058 |  |  |
|  |  | participants; employ     | NCT02943447 |  |  |
|  |  | blinding; avoid post-    | NCT03124108 |  |  |
|  |  | randomisation            | NCT03345589 |  |  |
|  |  | dropouts or planned      | NCT03092765 |  |  |
|  |  | cross-overs; should      | NCT03394924 |  |  |
|  |  | have sufficient follow-  | NCT02516605 |  |  |
|  |  | up period (e.g. five or  | NCT03253276 |  |  |
|  |  | 10 years or more); and   | NCT02965911 |  |  |
|  |  | use clinically important | NCT01899703 |  |  |
|  |  | outcomes such as         | NCT01654731 |  |  |
|  |  | mortality, health-       | NCT02308111 |  |  |
|  |  | related quality of life, | NCT00125281 |  |  |
|  |  | cirrhosis,               | NCT02701166 |  |  |
|  |  | decompensated            |             |  |  |

|                                                                                                        |                                                                                                                                                                                                                                                                                                                                                                       |                                                                                                                                                                 |  |  |  |
|--------------------------------------------------------------------------------------------------------|-----------------------------------------------------------------------------------------------------------------------------------------------------------------------------------------------------------------------------------------------------------------------------------------------------------------------------------------------------------------------|-----------------------------------------------------------------------------------------------------------------------------------------------------------------|--|--|--|
|                                                                                                        |                                                                                                                                                                                                                                                                                                                                                                       | <p>cirrhosis, and liver transplantation.</p> <p>Alternatively, very large groups of participants should be randomised to facilitate shorter trial duration.</p> |  |  |  |
| <p>Are there any treatments that reverse the liver damage in primary sclerosing cholangitis (PSC)?</p> | <p>The evidence related to this question is covered under treatments for primary sclerosing cholangitis. The systematic review did not include fibrosis as one of the outcomes. Nine of the trials included in the systematic review reported on fibrosis. Two of the trials not included in the systematic review (and listed above) reported on liver fibrosis.</p> |                                                                                                                                                                 |  |  |  |

a Numbers indicate the reference number.

b Ongoing trials, unpublished trials, or trials published since the search date for the systematic review when a high-quality systematic review based on randomised controlled trials exists. If no systematic reviews based on randomised controlled trials exist, these are either published trials or ongoing studies.

c NCT followed by a number indicates trial registration number

d This information is reported to find out whether the important patient-oriented outcomes are reported in the trials not covered by high-quality systematic reviews. This is to help with deciding whether new randomised controlled trials are necessary on the topic.

e The remaining trials reported treatment-related adverse events, composite outcomes and surrogate markers.

Appendix 4 Scores obtained by each question in the different Delphi rounds

| Questions <sup>a</sup> | Delphi 1:<br>Proportion<br>who rated<br>this question<br>as highly<br>important | Delphi 1:<br>Median<br>(IQR) | Delphi 2:<br>Proportion<br>who rated<br>this question<br>as highly<br>important | Delphi 2:<br>Median<br>(IQR) | Delphi 3:<br>Proportion<br>who rated<br>this question<br>as highly<br>important | Delphi 3:<br>Median<br>(IQR) | Consensus<br>reached in<br>Delphi 3? <sup>b</sup> |
|------------------------|---------------------------------------------------------------------------------|------------------------------|---------------------------------------------------------------------------------|------------------------------|---------------------------------------------------------------------------------|------------------------------|---------------------------------------------------|
|------------------------|---------------------------------------------------------------------------------|------------------------------|---------------------------------------------------------------------------------|------------------------------|---------------------------------------------------------------------------------|------------------------------|---------------------------------------------------|

|                                                                                                                                                                                                                                                                   |                                        |                                                 |                                        |                                                                    |                                        |                                                 |     |
|-------------------------------------------------------------------------------------------------------------------------------------------------------------------------------------------------------------------------------------------------------------------|----------------------------------------|-------------------------------------------------|----------------------------------------|--------------------------------------------------------------------|----------------------------------------|-------------------------------------------------|-----|
| 1.What are the best treatments that cure or delay the progression (worsening) of primary sclerosing cholangitis (PSC)?                                                                                                                                            | All: 78.8%<br>HCP: 80.0%<br>PCP: 76.9% | All: 8(7,9)<br>HCP: 8.5(7,9)<br>PCP: 8(6.5,9)   | All: 83.9%<br>HCP: 83.3%<br>PCP: 84.6% | All: 8(7,9)<br>HCP: 8(7,9)<br>PCP: 8(7,9)                          | All: 93.3%<br>HCP: 94.1%<br>PCP: 92.3% | All: 8(7,9)<br>HCP: 8(7,9)<br>PCP: 8(7,9)       | Yes |
| 2.Should all people above 40 years of age or those considered to be at risk of liver disease (because of family history of liver disease or because of their lifestyle) be tested for the presence of liver disease to identify liver diseases at an early stage? | All: 44.4%<br>HCP: 40.0%<br>PCP: 50.0% | All: 6(5,7)<br>HCP: 6(5,7)<br>PCP:<br>6(4,7.75) | All: 35.3%<br>HCP: 27.8%<br>PCP: 43.8% | All: 6(5,7)<br>HCP: 6(5,7)<br>PCP:<br>6(5,7.75)                    | All: 33.3%<br>HCP: 29.4%<br>PCP: 37.5% | All: 6(5,7)<br>HCP: 6(5,7)<br>PCP:<br>6(5,7.75) | No  |
| 3.Should people with primary sclerosing cholangitis (PSC) undergo screening (tested routinely) for cancer?                                                                                                                                                        | All: 46.9%<br>HCP: 40.0%<br>PCP: 58.3% | All: 6(5,9)<br>HCP: 6(5,9)<br>PCP: 6(5,9)       | All: 50.0%<br>HCP: 38.9%<br>PCP: 66.7% | All:<br>6.5(5.75,8)<br>HCP:<br>6(5.75,7.25)<br>PCP:<br>6.5(5.25,9) | All: 44.8%<br>HCP: 35.3%<br>PCP: 58.3% | All: 6(6,7.5)<br>HCP: 6(5.5,7)<br>PCP: 6(6,9)   | No  |

|                                                                                                                                   |                                        |                                                             |                                        |                                                          |                                        |                                                   |     |
|-----------------------------------------------------------------------------------------------------------------------------------|----------------------------------------|-------------------------------------------------------------|----------------------------------------|----------------------------------------------------------|----------------------------------------|---------------------------------------------------|-----|
| 4.Are there any treatments that reverse the liver damage in primary sclerosing cholangitis (PSC)?                                 | All: 59.4%<br>HCP: 55.0%<br>PCP: 66.7% | All:<br>7.5(5,8.75)<br>HCP:<br>7.5(4.25,8)<br>PCP: 7.5(6,9) | All: 70.0%<br>HCP: 61.1%<br>PCP: 83.3% | All: 7.5(6,9)<br>HCP:<br>7.5(4.75,8.25)<br>PCP: 7.5(7,9) | All: 72.4%<br>HCP: 64.7%<br>PCP: 83.3% | All: 7(6,9)<br>HCP: 7(5,8)<br>PCP: 7(7,9)         | No  |
| 5.What are the best treatments that cure or delay the progression (worsening) of non-alcohol-related fatty liver disease (NAFLD)? | All: 76.5%<br>HCP: 75.0%<br>PCP: 78.6% | All: 8(6.75,9)<br>HCP:<br>8.5(6.25,9)<br>PCP:<br>8(6.75,9)  | All: 87.5%<br>HCP: 83.3%<br>PCP: 92.9% | All: 8.5(7,9)<br>HCP: 8.5(7,9)<br>PCP: 8.5(7,9)          | All: 90.3%<br>HCP: 88.2%<br>PCP: 92.9% | All: 9(8,9)<br>HCP: 9(7.5,9)<br>PCP:<br>9(7.75,9) | Yes |
| 6.What are the best symptomatic treatments for itching in people with primary sclerosing cholangitis (PSC)?                       | All: 48.5%<br>HCP: 45.0%<br>PCP: 53.8% | All: 6(5,7.5)<br>HCP: 6(5,7)<br>PCP: 6(5.5,8)               | All: 48.4%<br>HCP: 38.9%<br>PCP: 61.5% | All: 6(5,7)<br>HCP:<br>6(4.75,7)<br>PCP: 6(6,8)          | All: 50.0%<br>HCP: 41.2%<br>PCP: 61.5% | All: 6.5(5,7)<br>HCP: 6(4.5,7)<br>PCP: 6.5(6,8)   | No  |



|                                                                                                                                                                                                            |                                        |                                                 |                                        |                                             |                                        |                                                          |     |
|------------------------------------------------------------------------------------------------------------------------------------------------------------------------------------------------------------|----------------------------------------|-------------------------------------------------|----------------------------------------|---------------------------------------------|----------------------------------------|----------------------------------------------------------|-----|
| 7.Are there alternatives to invasive assessment of oesophageal varices in people with chronic liver disease?                                                                                               | All: 48.6%<br>HCP: 30.0%<br>PCP: 73.3% | All: 6(5,8)<br>HCP: 6(3,7)<br>PCP: 6(6,9)       | All: 54.5%<br>HCP: 33.3%<br>PCP: 80.0% | All: 7(5.5,8)<br>HCP: 6(4,7)<br>PCP: 7(7,9) | All: 56.3%<br>HCP: 29.4%<br>PCP: 86.7% | All: 7(6,8)<br>HCP: 6(4,7)<br>PCP: 7(7,9)                | No  |
| 8.Does vitamin D supplementation (adding Vitamin D in food or providing it in tablet form) increase the lifespan, health-related quality of life, and decrease complications in people with liver disease? | All: 37.1%<br>HCP: 21.1%<br>PCP: 56.3% | All: 6(4,7)<br>HCP: 4(4,6)<br>PCP: 6(6,9)       | All: 39.4%<br>HCP: 23.5%<br>PCP: 56.3% | All: 6(4,7)<br>HCP: 5(4,6.5)<br>PCP: 6(6,9) | All: 37.5%<br>HCP: 18.8%<br>PCP: 56.3% | All:<br>6(4.25,7.75)<br>HCP: 5(4,6)<br>PCP:<br>6(6,8.75) | No  |
| 9.Should new methods to improve the understanding of evidence be developed for people with liver and gallbladder diseases?                                                                                 | All: 38.2%<br>HCP: 25.0%<br>PCP: 57.1% | All: 6(4,8)<br>HCP:<br>5(4,6.75)<br>PCP: 6(5,9) | All: 46.9%<br>HCP: 27.8%<br>PCP: 71.4% | All: 6(4,8)<br>HCP: 5(4,7)<br>PCP: 6(5,9)   | All: 48.4%<br>HCP: 29.4%<br>PCP: 71.4% | All: 6(5,8)<br>HCP: 6(4.5,7)<br>PCP: 6(5,9)              | No  |
| 10.What is the best treatment for people with early or very early hepatocellular carcinoma (HCC)?                                                                                                          | All: 76.5%<br>HCP: 75.0%<br>PCP: 78.6% | All: 8(6.75,9)<br>HCP:<br>7(6.25,9)             | All: 87.5%<br>HCP: 88.9%<br>PCP: 85.7% | All: 8(7,9)<br>HCP: 8(7,9)<br>PCP: 8(7,9)   | All: 93.5%<br>HCP: 94.1%<br>PCP: 92.9% | All: 8(7,9)<br>HCP: 8(7,9)                               | Yes |

|                                                                                                                                                     |                                        |                                                     |                                        |                                                                |                                        |                                                 |     |
|-----------------------------------------------------------------------------------------------------------------------------------------------------|----------------------------------------|-----------------------------------------------------|----------------------------------------|----------------------------------------------------------------|----------------------------------------|-------------------------------------------------|-----|
|                                                                                                                                                     |                                        | PCP:<br>8(6.75,9)                                   |                                        |                                                                |                                        | PCP:<br>8(7.75,9)                               |     |
| 11.Should the methods used to assess nutrition of patients in liver disease be standardised?                                                        | All: 57.1%<br>HCP: 60.0%<br>PCP: 53.3% | All: 7(5,9)<br>HCP:<br>7(5,8.75)<br>PCP: 7(5,9)     | All: 54.5%<br>HCP: 55.6%<br>PCP: 53.3% | All: 7(5,8)<br>HCP: 7(5,8)<br>PCP: 7(5,9)                      | All: 59.4%<br>HCP: 58.8%<br>PCP: 60.0% | All: 7(5,8)<br>HCP: 7(5,8)<br>PCP: 7(5,8)       | No  |
| 12.Does dieting improve liver function and decrease the requirement for liver transplantation in obese people?                                      | All: 48.6%<br>HCP: 38.1%<br>PCP: 62.5% | All: 6(4,8)<br>HCP: 6(3,8)<br>PCP:<br>6(5.25,7)     | All: 44.1%<br>HCP: 27.8%<br>PCP: 62.5% | All: 6(4,7.25)<br>HCP:<br>6(3.75,7.25)<br>PCP:<br>6(5.25,7.75) | All: 48.5%<br>HCP: 29.4%<br>PCP: 68.8% | All: 6(5,7)<br>HCP: 6(5,7)<br>PCP:<br>6(5.25,7) | No  |
| 13.Should general public be educated about non-alcohol-related fatty liver disease (NAFLD) with an aim to reduce the numbers of those that have it? | All: 72.2%<br>HCP: 75.0%<br>PCP: 68.8% | All: 7.5(6,9)<br>HCP:<br>8(6.25,9)<br>PCP: 7.5(6,9) | All: 73.5%<br>HCP: 72.2%<br>PCP: 75.0% | All: 8(6,9)<br>HCP:<br>7.5(5.75,9)<br>PCP:<br>8(6.25,9)        | All: 81.8%<br>HCP: 82.4%<br>PCP: 81.3% | All: 8(7,9)<br>HCP: 8(7,9)<br>PCP: 8(7,9)       | Yes |

|                                                                                                                                                                                                                     |                                        |                                               |                                        |                                                       |                                        |                                                   |    |
|---------------------------------------------------------------------------------------------------------------------------------------------------------------------------------------------------------------------|----------------------------------------|-----------------------------------------------|----------------------------------------|-------------------------------------------------------|----------------------------------------|---------------------------------------------------|----|
| 14. What are the best symptomatic treatments for itching in people with chronic liver diseases other than primary sclerosing cholangitis (PSC) and primary biliary cholangitis (PBC)?                               | All: 48.5%<br>HCP: 35.0%<br>PCP: 69.2% | All: 6(4.5,7)<br>HCP: 6(4,7)<br>PCP: 6(5,7.5) | All: 48.4%<br>HCP: 27.8%<br>PCP: 76.9% | All: 6(5,7)<br>HCP: 6(4,7)<br>PCP: 6(6,8)             | All: 50.0%<br>HCP: 29.4%<br>PCP: 76.9% | All: 6.5(5,7)<br>HCP: 6(4.5,7)<br>PCP: 6.5(6.5,8) | No |
| 15. Do treatments targeted against deformation of bile duct (biliary stricture or narrowing of bile duct due to the illness) work better than other treatments in people with primary sclerosing cholangitis (PSC)? | All: 19.4%<br>HCP: 21.1%<br>PCP: 16.7% | All: 5(4,6)<br>HCP: 5(4,6)<br>PCP: 5(4,6)     | All: 20.0%<br>HCP: 16.7%<br>PCP: 25.0% | All: 5(4,6)<br>HCP:<br>5(3.75,6)<br>PCP:<br>5(4,6.75) | All: 20.7%<br>HCP: 17.6%<br>PCP: 25.0% | All: 5(4,6)<br>HCP: 5(3.5,6)<br>PCP: 5(4,6.75)    | No |
| 16. What are the treatments available to decrease weight in overweight people with non-alcohol-related fatty liver disease (NAFLD)?                                                                                 | All: 37.1%<br>HCP: 35.0%<br>PCP: 40.0% | All: 5(4,8)<br>HCP: 5.5(4,7)<br>PCP: 5(4,8)   | All: 27.3%<br>HCP: 22.2%<br>PCP: 33.3% | All: 6(4,7)<br>HCP:<br>6(4,6.25)<br>PCP: 6(3,8)       | All: 28.1%<br>HCP: 23.5%<br>PCP: 33.3% | All: 5(4,7)<br>HCP: 5(5,6.5)<br>PCP: 5(3,7)       | No |

|                                                                                                                                |                                        |                                                                   |                                        |                                                          |                                        |                                                       |    |
|--------------------------------------------------------------------------------------------------------------------------------|----------------------------------------|-------------------------------------------------------------------|----------------------------------------|----------------------------------------------------------|----------------------------------------|-------------------------------------------------------|----|
| 17. What are the best treatments that cure or delay the progression (worsening) of non-alcohol related steatohepatitis (NASH)? | All: 67.6%<br>HCP: 71.4%<br>PCP: 61.5% | All: 8(5,8.25)<br>HCP: 8(5.5,9)<br>PCP: 8(5,8)                    | All: 71.0%<br>HCP: 77.8%<br>PCP: 61.5% | All: 8(6,9)<br>HCP:<br>7.5(6.75,9)<br>PCP: 8(5,8.5)      | All: 76.7%<br>HCP: 82.4%<br>PCP: 69.2% | All: 8(6.75,9)<br>HCP: 8(7,9)<br>PCP: 8(5,8.5)        | No |
| 18. Do statins (or other treatments) delay liver failure in people with advanced liver disease?                                | All: 45.7%<br>HCP: 36.8%<br>PCP: 56.3% | All: 6(5,7)<br>HCP: 6(4,7)<br>PCP:<br>6(6,7.75)                   | All: 39.4%<br>HCP: 35.3%<br>PCP: 43.8% | All: 6(6,7)<br>HCP: 6(3.5,7)<br>PCP:<br>6(6,7.75)        | All: 43.8%<br>HCP: 37.5%<br>PCP: 50.0% | All: 6(6,7)<br>HCP:<br>6(5.25,7)<br>PCP:<br>6(6,7.75) | No |
| 19. What are the best treatments that provide temporary symptom relief in people with advanced liver disease?                  | All: 50.0%<br>HCP: 35.0%<br>PCP: 68.8% | All:<br>6.5(5,7.75)<br>HCP: 6(5,7)<br>PCP:<br>6.5(5.25,8.75)<br>) | All: 52.9%<br>HCP: 33.3%<br>PCP: 75.0% | All:<br>7(5.75,7.25)<br>HCP: 6(5,7)<br>PCP:<br>7(6.25,8) | All: 54.5%<br>HCP: 35.3%<br>PCP: 75.0% | All: 7(6,7)<br>HCP: 6(5,7)<br>PCP:<br>7(6.25,8)       | No |

|                                                                                                                                                                                                                                               |                                        |                                             |                                        |                                                     |                                        |                                                   |     |
|-----------------------------------------------------------------------------------------------------------------------------------------------------------------------------------------------------------------------------------------------|----------------------------------------|---------------------------------------------|----------------------------------------|-----------------------------------------------------|----------------------------------------|---------------------------------------------------|-----|
| 20. Which is the most suitable antibiotic (or combination of antibiotics) in people with cholangitis (biliary infection)?                                                                                                                     | All: 64.7%<br>HCP: 70.0%<br>PCP: 57.1% | All: 7(5,8)<br>HCP: 7(6,8)<br>PCP: 7(5,8)   | All: 68.8%<br>HCP: 72.2%<br>PCP: 64.3% | All: 7(5.25,8)<br>HCP: 7(6,8)<br>PCP: 7(5,8)        | All: 67.7%<br>HCP: 70.6%<br>PCP: 64.3% | All: 7(5,8)<br>HCP: 7(6,8)<br>PCP: 7(5,8)         | No  |
| 21. What are the best treatments that cure or delay the progression (worsening) of autoimmune hepatitis (AIH)?                                                                                                                                | All: 75.8%<br>HCP: 68.4%<br>PCP: 85.7% | All: 7(6.5,9)<br>HCP: 7(6,8)<br>PCP: 7(7,9) | All: 81.3%<br>HCP: 77.8%<br>PCP: 85.7% | All: 7.5(7,9)<br>HCP:<br>7(6.75,8)<br>PCP: 7.5(7,9) | All: 80.6%<br>HCP: 76.5%<br>PCP: 85.7% | All: 8(7,9)<br>HCP: 7(6.5,8)<br>PCP: 8(7,9)       | Yes |
| 22. Are there any methods other than liver biopsy (obtaining a piece of liver, usually using a needle, for examination under microscope) for the early diagnosis of primary sclerosing cholangitis (PSC) in people at risk of developing PSC? | All: 53.1%<br>HCP: 36.8%<br>PCP: 76.9% | All: 7(5,8)<br>HCP: 6(5,7)<br>PCP: 7(6.5,8) | All: 60.0%<br>HCP: 47.1%<br>PCP: 76.9% | All: 7(5,8)<br>HCP: 6(5,8)<br>PCP: 7(6.5,8)         | All: 58.6%<br>HCP: 43.8%<br>PCP: 76.9% | All: 7(5,8)<br>HCP:<br>6(5,7.75)<br>PCP: 7(6.5,8) | No  |
| 23. What are the best nutritional interventions in people undergoing liver transplantation?                                                                                                                                                   | All: 52.8%<br>HCP: 42.9%<br>PCP: 66.7% | All: 7(5,8)<br>HCP: 6(4,8)<br>PCP: 7(5,8)   | All: 51.5%<br>HCP: 38.9%<br>PCP: 66.7% | All: 7(5,8)<br>HCP:                                 | All: 53.1%<br>HCP: 41.2%<br>PCP: 66.7% | All: 7(5,8)<br>HCP: 6(5,7)<br>PCP: 7(6,8)         | No  |

1  
2  
3  
4  
5  
6  
7  
8  
9  
10  
11  
12  
13  
14  
15  
16  
17  
18  
19  
20  
21  
22  
23  
24  
25  
26  
27  
28  
29  
30  
31  
32  
33  
34  
35  
36  
37  
38  
39  
40  
41  
42  
43  
44  
45  
46

|                                                                                                                                                                                                                                                                                                             |                                        |                                                 |                                        |                                                    |                                        |                                                 |    |
|-------------------------------------------------------------------------------------------------------------------------------------------------------------------------------------------------------------------------------------------------------------------------------------------------------------|----------------------------------------|-------------------------------------------------|----------------------------------------|----------------------------------------------------|----------------------------------------|-------------------------------------------------|----|
|                                                                                                                                                                                                                                                                                                             |                                        |                                                 |                                        | 6(4,7.25)<br>PCP: 7(5,8)                           |                                        |                                                 |    |
| 24.What are the best symptomatic treatments for fatigue (tiredness), joint pain, and other symptoms in people with people with autoimmune hepatitis (AIH)?                                                                                                                                                  | All: 61.8%<br>HCP: 45.0%<br>PCP: 85.7% | All: 7(6,8)<br>HCP:<br>6(3.25,7)<br>PCP: 7(7,9) | All: 65.6%<br>HCP: 50.0%<br>PCP: 85.7% | All: 7(6,8)<br>HCP:<br>6.5(3.75,7)<br>PCP: 7(7,9)  | All: 64.5%<br>HCP: 47.1%<br>PCP: 85.7% | All: 7(6,8)<br>HCP: 6(4,7)<br>PCP: 7(7,9)       | No |
| 25.Prior to liver transplantation, is it better to transport the donor liver using a machine which pumps blood or preservation solution through the liver (machine perfusion) or is it better to transport it in the standard way of transporting it immersed in cold preservation solution (cold storage)? | All: 54.5%<br>HCP: 42.1%<br>PCP: 71.4% | All: 7(5,9)<br>HCP: 6(5,8)<br>PCP: 7(6,9)       | All: 68.8%<br>HCP: 61.1%<br>PCP: 78.6% | All: 7(6,8.75)<br>HCP: 7(5,8)<br>PCP:<br>7(6.75,9) | All: 74.2%<br>HCP: 70.6%<br>PCP: 78.6% | All: 7(6,9)<br>HCP: 7(6,8)<br>PCP:<br>7(6.75,9) | No |

|                                                                                                                                                                                              |                                        |                                                           |                                        |                                                          |                                        |                                                    |    |
|----------------------------------------------------------------------------------------------------------------------------------------------------------------------------------------------|----------------------------------------|-----------------------------------------------------------|----------------------------------------|----------------------------------------------------------|----------------------------------------|----------------------------------------------------|----|
| 26. What are the best treatments that cure or delay the progression (worsening) of chronic hepatitis C virus (HCV) infection?                                                                | All: 42.4%<br>HCP: 42.9%<br>PCP: 41.7% | All: 6(2,8)<br>HCP: 5(1,8)<br>PCP:<br>6(4.25,7.75)        | All: 40.0%<br>HCP: 44.4%<br>PCP: 33.3% | All: 5.5(2,7)<br>HCP: 4.5(1,8)<br>PCP:<br>5.5(4.25,7)    | All: 37.9%<br>HCP: 47.1%<br>PCP: 25.0% | All: 5(2,7)<br>HCP: 5(1,8)<br>PCP:<br>5(4.25,6.75) | No |
| 27. Does education of people with liver disease about the natural course and treatment of liver disease improve the patient knowledge, patient responsibility, and decrease hospital visits? | All: 51.4%<br>HCP: 52.4%<br>PCP: 50.0% | All: 7(4,8)<br>HCP:<br>7(4.5,7.5)<br>PCP:<br>7(3.25,8.75) | All: 58.8%<br>HCP: 50.0%<br>PCP: 68.8% | All: 7(4,7.25)<br>HCP: 6.5(4,7)<br>PCP:<br>7(4,8.75)     | All: 57.6%<br>HCP: 47.1%<br>PCP: 68.8% | All: 7(4,8)<br>HCP: 6(4,7)<br>PCP: 7(4,8)          | No |
| 28. What are the best treatments that cure or delay the progression (worsening) of primary biliary cholangitis (PBC)?                                                                        | All: 61.8%<br>HCP: 60.0%<br>PCP: 64.3% | All: 7(5.75,8)<br>HCP: 7(6,8)<br>PCP: 7(5,8)              | All: 68.8%<br>HCP: 66.7%<br>PCP: 71.4% | All: 7(6,8)<br>HCP:<br>7(5.75,8)<br>PCP:<br>7(5.75,8.25) | All: 74.2%<br>HCP: 70.6%<br>PCP: 78.6% | All: 7(6,8)<br>HCP: 7(6,8)<br>PCP:<br>7(6.5,8.25)  | No |

|                                                                                                                                                                                         |                                        |                                                        |                                        |                                                   |                                        |                                                   |    |
|-----------------------------------------------------------------------------------------------------------------------------------------------------------------------------------------|----------------------------------------|--------------------------------------------------------|----------------------------------------|---------------------------------------------------|----------------------------------------|---------------------------------------------------|----|
| 29. Is nurse-led care as effective or better than doctor-led care for non-alcohol related fatty liver disease (NAFLD)?                                                                  | All: 38.2%<br>HCP: 35.0%<br>PCP: 42.9% | All: 5(4,8)<br>HCP:<br>4.5(3,7.75)<br>PCP: 5(4,8)      | All: 31.3%<br>HCP: 27.8%<br>PCP: 35.7% | All: 5(4,7)<br>HCP: 4(3,7)<br>PCP:<br>5(4,7.25)   | All: 25.8%<br>HCP: 23.5%<br>PCP: 28.6% | All: 5(4,7)<br>HCP:<br>4(3.5,6.5)<br>PCP: 5(4,7)  | No |
| 30. Is treatment targeted against deformation of bile duct (biliary stricture or narrowing of bile duct due to cancer) better than standard treatment for people with bile duct cancer? | All: 35.5%<br>HCP: 27.8%<br>PCP: 46.2% | All: 5(4,7)<br>HCP:<br>5(2.75,7)<br>PCP: 5(4,7.5)      | All: 22.6%<br>HCP: 11.1%<br>PCP: 38.5% | All: 5(4,6)<br>HCP: 5(3.5,6)<br>PCP: 5(4,7)       | All: 20.0%<br>HCP: 11.8%<br>PCP: 30.8% | All: 5(4,6)<br>HCP: 5(3.5,6)<br>PCP: 5(4,7)       | No |
| 31. Is surgery (in the form of removal of gallbladder) required in people with gallstones?                                                                                              | All: 24.2%<br>HCP: 23.8%<br>PCP: 25.0% | All: 5(4,6.5)<br>HCP: 5(4,6.5)<br>PCP:<br>5(4.25,6.75) | All: 30.0%<br>HCP: 33.3%<br>PCP: 25.0% | All: 5(4,7)<br>HCP: 5(4,7)<br>PCP:<br>5(3.5,6.75) | All: 24.1%<br>HCP: 29.4%<br>PCP: 16.7% | All: 5(4.5,6.5)<br>HCP: 5(4.5,7)<br>PCP: 5(3.5,6) | No |
| 32. Should people with non-alcohol-related fatty liver disease (NAFLD) and non-alcohol-related steatohepatitis                                                                          | All: 52.9%<br>HCP: 50.0%<br>PCP: 57.1% | All: 7(4,8)<br>HCP:<br>PCP:                            | All: 56.3%<br>HCP: 50.0%<br>PCP: 64.3% | All: 7(4.25,8)<br>HCP:<br>6.5(2,7.25)             | All: 54.8%<br>HCP: 47.1%<br>PCP: 64.3% | All: 7(5,8)<br>HCP: 6(4,7.5)<br>PCP:              | No |



|                                                                                                                                                                                                                                 |                                        |                                                    |                                        |                                                 |                                         |                                                 |     |
|---------------------------------------------------------------------------------------------------------------------------------------------------------------------------------------------------------------------------------|----------------------------------------|----------------------------------------------------|----------------------------------------|-------------------------------------------------|-----------------------------------------|-------------------------------------------------|-----|
| (NASH) receive additional education about the condition?                                                                                                                                                                        |                                        | 6.5(2.5,7.75)<br>PCP: 7(4,9)                       |                                        | PCP:<br>7(5.75,8.25)                            |                                         | PCP:<br>7(5.75,8.25)                            |     |
| 33.What is the best immunosuppressive regimen in adults undergoing liver transplantation?                                                                                                                                       | All: 73.5%<br>HCP: 60.0%<br>PCP: 92.9% | All: 7(6,9)<br>HCP: 7(5,8)<br>PCP: 7(7,9)          | All: 84.4%<br>HCP: 77.8%<br>PCP: 92.9% | All: 8(7,9)<br>HCP: 7(6.5,8)<br>PCP: 8(7,9)     | All: 90.3%<br>HCP: 82.4%<br>PCP: 100.0% | All: 8(7,9)<br>HCP: 8(7,8)<br>PCP:<br>8(7.75,9) | Yes |
| 34.Is endoscopic ultrasound (EUS) (using a ultrasound attached to the end of an endoscope) or magnetic resonance cholangio pancreatography (MRCP, a form of MRI scan) better in the diagnosis of common bile duct (CBD) stones? | All: 36.7%<br>HCP: 22.2%<br>PCP: 58.3% | All: 5(4,7)<br>HCP:<br>4(3.75,6.25)<br>PCP: 5(5,7) | All: 30.0%<br>HCP: 22.2%<br>PCP: 41.7% | All: 5(4,7)<br>HCP:<br>5(4,6.25)<br>PCP: 5(5,7) | All: 20.7%<br>HCP: 11.8%<br>PCP: 33.3%  | All: 5(4,6)<br>HCP: 5(4,6)<br>PCP: 5(5,7)       | No  |
| 35.How can we improve compliance to treatment (adherence to treatment or the degree to which a patient correctly                                                                                                                | All: 67.6%<br>HCP: 75.0%<br>PCP: 57.1% | All: 7(5,8)<br>HCP:<br>7(6.25,8)                   | All: 69.7%<br>HCP: 72.2%<br>PCP: 66.7% | All: 7(5,8)<br>HCP:<br>7(4.75,8)<br>PCP: 7(5,8) | All: 71.9%<br>HCP: 70.6%<br>PCP: 73.3%  | All: 7(5,8)<br>HCP: 7(5,8)<br>PCP: 7(5,8)       | No  |

|                                                                                                                                                                                 |                                        |                                                     |                                        |                                                          |                                        |                                                   |    |
|---------------------------------------------------------------------------------------------------------------------------------------------------------------------------------|----------------------------------------|-----------------------------------------------------|----------------------------------------|----------------------------------------------------------|----------------------------------------|---------------------------------------------------|----|
| follows medical advice) in people with liver disease?                                                                                                                           |                                        | PCP:<br>7(4.75,8)                                   |                                        |                                                          |                                        |                                                   |    |
| 36.What are the best symptomatic treatments for relief of ulcerative colitis (UC) in people with primary sclerosing cholangitis (PSC) who have undergone liver transplantation? | All: 51.6%<br>HCP: 36.8%<br>PCP: 75.0% | All: 7(5,8)<br>HCP: 6(4,7)<br>PCP:<br>7(5.5,8.75)   | All: 56.7%<br>HCP: 44.4%<br>PCP: 75.0% | All: 7(5,8)<br>HCP:<br>6(4.75,7)<br>PCP:<br>7(6.25,8.75) | All: 55.2%<br>HCP: 41.2%<br>PCP: 75.0% | All: 7(6,8)<br>HCP: 6(5.5,7)<br>PCP:<br>7(6.25,9) | No |
| 37.What are the best symptomatic treatments for itching and fatigue (tiredness) in people with primary biliary cholangitis (PBC)?                                               | All: 50.0%<br>HCP: 45.0%<br>PCP: 57.1% | All: 6.5(5,7)<br>HCP: 6(5,7)<br>PCP:<br>6.5(5,7.25) | All: 43.8%<br>HCP: 33.3%<br>PCP: 57.1% | All: 6(5,7)<br>HCP: 6(5,7)<br>PCP: 6(5,8)                | All: 41.9%<br>HCP: 29.4%<br>PCP: 57.1% | All: 6(5,7)<br>HCP: 6(5,7)<br>PCP: 6(5,8)         | No |
| 38.Does education of people with asymptomatic (absence of symptoms) liver disease result in change of life style and cure/delay the progression (worsening) of liver disease?   | All: 54.3%<br>HCP: 45.0%<br>PCP: 66.7% | All: 7(5,8)<br>HCP:<br>6(4.25,7.75)<br>PCP: 7(5,8)  | All: 51.5%<br>HCP: 38.9%<br>PCP: 66.7% | All: 7(4.5,8)<br>HCP:<br>5(3.5,7.25)<br>PCP: 7(5,8)      | All: 53.1%<br>HCP: 35.3%<br>PCP: 73.3% | All: 7(5,7.75)<br>HCP: 5(4,7)<br>PCP: 7(5,8)      | No |

|                                                                                                                                                                                                                        |                                        |                                                 |                                        |                                                          |                                        |                                                        |    |
|------------------------------------------------------------------------------------------------------------------------------------------------------------------------------------------------------------------------|----------------------------------------|-------------------------------------------------|----------------------------------------|----------------------------------------------------------|----------------------------------------|--------------------------------------------------------|----|
| 39. What are the best treatments that are available for the treatment of pregnant women with cholestasis (condition where bile flow from the liver is obstructed)?                                                     | All: 38.7%<br>HCP: 25.0%<br>PCP: 63.6% | All: 6(4,7)<br>HCP:<br>5(4,6.75)<br>PCP: 6(6,8) | All: 31.0%<br>HCP: 27.8%<br>PCP: 36.4% | All: 6(4.5,7)<br>HCP: 5(4,7)<br>PCP: 6(6,8)              | All: 27.6%<br>HCP: 23.5%<br>PCP: 33.3% | All: 6(5,7)<br>HCP:<br>5(4.5,6.5)<br>PCP:<br>6(5.25,7) | No |
| 40. Is transarterial chemoembolisation (TACE) or transarterial embolisation (TAE) (blocking the blood supply to cancer with or without chemotherapy drugs) effective in the treatment of people with liver metastases? | All: 40.6%<br>HCP: 36.8%<br>PCP: 46.2% | All: 6(4,8)<br>HCP: 6(3,8)<br>PCP: 6(5,8.5)     | All: 34.4%<br>HCP: 22.2%<br>PCP: 50.0% | All: 6(4,7)<br>HCP:<br>5.5(3,6.25)<br>PCP: 6(5,7)        | All: 32.3%<br>HCP: 23.5%<br>PCP: 42.9% | All: 6(5,7)<br>HCP:<br>6(3.5,6.5)<br>PCP: 6(5,7)       | No |
| 41. Should people with liver metastases (cancer spread to the liver) from neuroendocrine cancer (a form of cancer that arises from cells that secrete                                                                  | All: 36.7%<br>HCP: 31.6%<br>PCP: 45.5% | All: 6(4,7.25)<br>HCP: 6(4,7)<br>PCP: 6(5,8)    | All: 40.0%<br>HCP: 38.9%<br>PCP: 41.7% | All:<br>6(4.75,7.25)<br>HCP: 6(4,7)<br>PCP:<br>6(5.25,8) | All: 37.9%<br>HCP: 41.2%<br>PCP: 33.3% | All: 6(5.5,7)<br>HCP: 6(5,7)<br>PCP:<br>6(5.25,8)      | No |

|                                                                                                                              |                                        |                                              |                                        |                                                      |                                        |                                               |    |
|------------------------------------------------------------------------------------------------------------------------------|----------------------------------------|----------------------------------------------|----------------------------------------|------------------------------------------------------|----------------------------------------|-----------------------------------------------|----|
| hormones and nervous system) undergo liver resection?                                                                        |                                        |                                              |                                        |                                                      |                                        |                                               |    |
| 42.What are the best methods available to decrease blood loss during liver resection?                                        | All: 43.8%<br>HCP: 26.3%<br>PCP: 69.2% | All: 6(5,7.75)<br>HCP: 5(3,7)<br>PCP: 6(6,8) | All: 48.4%<br>HCP: 27.8%<br>PCP: 76.9% | All: 6(5,8)<br>HCP: 5.5(4,7)<br>PCP: 6(6.5,8)        | All: 46.7%<br>HCP: 29.4%<br>PCP: 69.2% | All: 6(5,7.25)<br>HCP: 6(5,7)<br>PCP: 6(6,8)  | No |
| 43.What are the best treatments that cure or delay the progression (worsening) of chronic hepatitis B virus (HBV) infection? | All: 51.6%<br>HCP: 42.1%<br>PCP: 66.7% | All: 7(4,8)<br>HCP: 6(4,7)<br>PCP: 7(6,8)    | All: 46.7%<br>HCP: 38.9%<br>PCP: 58.3% | All:<br>6(4.75,7.25)<br>HCP: 5.5(4,7)<br>PCP: 6(6,8) | All: 48.3%<br>HCP: 41.2%<br>PCP: 58.3% | All: 6(5,7.5)<br>HCP: 6(4.5,7)<br>PCP: 6(6,8) | No |
| 44.What are the best treatments for people with polycystic liver disease?                                                    | All: 39.3%<br>HCP: 17.6%<br>PCP: 72.7% | All: 6(4,8)<br>HCP: 5(4,6)<br>PCP: 6(6,8)    | All: 34.5%<br>HCP: 16.7%<br>PCP: 63.6% | All: 6(4,8)<br>HCP:<br>5(3.75,6)<br>PCP: 6(6,8)      | All: 35.7%<br>HCP: 17.6%<br>PCP: 63.6% | All: 6(5,7)<br>HCP: 5(4,6)<br>PCP: 6(6,7)     | No |
| 45.Should the HCP dealing with childhood liver diseases be provided additional education about childhood liver diseases      | All: 35.5%<br>HCP: 15.0%<br>PCP: 72.7% | All: 5(3,8)<br>HCP:                          | All: 37.9%<br>HCP: 16.7%<br>PCP: 72.7% | All: 5(3.5,7.5)<br>HCP:                              | All: 37.9%<br>HCP: 17.6%<br>PCP: 66.7% | All: 5(4.5,7.5)<br>HCP: 5(2,5.5)              | No |

|                                                                                                    |                                                                                                                                                          |                                        |                                                 |                                        |                                                                   |                                        |                                                   |    |
|----------------------------------------------------------------------------------------------------|----------------------------------------------------------------------------------------------------------------------------------------------------------|----------------------------------------|-------------------------------------------------|----------------------------------------|-------------------------------------------------------------------|----------------------------------------|---------------------------------------------------|----|
| 1<br>2<br>3<br>4<br>5<br>6<br>7<br>8<br>9                                                          | compared to standard education where childhood diseases are learnt as part of overall education?                                                         |                                        | 5(2,5.75)<br>PCP: 5(5,9)                        |                                        | 5(2,5.25)<br>PCP: 5(6,9)                                          |                                        | PCP:<br>5(6,8.75)                                 |    |
| 10<br>11<br>12<br>13<br>14<br>15<br>16                                                             | 46.What is the best immunosuppressive regimen in children undergoing liver transplantation?                                                              | All: 65.6%<br>HCP: 57.9%<br>PCP: 76.9% | All: 8(4.25,9)<br>HCP: 7(4,8)<br>PCP: 8(6,9)    | All: 67.7%<br>HCP: 61.1%<br>PCP: 76.9% | All: 8(6,9)<br>HCP: 7.5(4,8)<br>PCP: 8(6.5,9)                     | All: 70.0%<br>HCP: 64.7%<br>PCP: 76.9% | All: 8(6,9)<br>HCP: 8(5,8)<br>PCP: 8(6.5,9)       | No |
| 17<br>18<br>19<br>20<br>21<br>22<br>23<br>24<br>25<br>26<br>27<br>28<br>29                         | 47.Should blood vessels supplying the liver be temporarily blocked in people undergoing liver resection? If so, what is the best way of performing this? | All: 31.0%<br>HCP: 11.1%<br>PCP: 63.6% | All: 6(4,7)<br>HCP:<br>5(2.75,6)<br>PCP: 6(5,7) | All: 26.7%<br>HCP: 11.1%<br>PCP: 50.0% | All: 5.5(4,7)<br>HCP:<br>5(3.75,6)<br>PCP:<br>5.5(5.25,7.75)<br>) | All: 27.6%<br>HCP: 11.8%<br>PCP: 50.0% | All: 6(5,7)<br>HCP: 5(4,6)<br>PCP:<br>6(5.25,7)   | No |
| 30<br>31<br>32<br>33<br>34<br>35<br>36<br>37<br>38<br>39<br>40<br>41<br>42<br>43<br>44<br>45<br>46 | 48.What is the best treatment that should be given to people who undergo liver transplantation for chronic hepatitis B virus (HBV) infection to prevent  | All: 46.9%<br>HCP: 40.0%<br>PCP: 58.3% | All: 6(3.5,7)<br>HCP: 6(3,7)<br>PCP: 6(6,8)     | All: 36.7%<br>HCP: 22.2%<br>PCP: 58.3% | All: 6(3,7)<br>HCP:<br>6(2.75,6.25)                               | All: 37.9%<br>HCP: 23.5%<br>PCP: 58.3% | All: 6(5,7)<br>HCP: 6(4,6.5)<br>PCP:<br>6(6,7.75) | No |

|    |                                              |   |   |            |                 |            |               |    |
|----|----------------------------------------------|---|---|------------|-----------------|------------|---------------|----|
| 1  | reinfestation with chronic hepatitis B virus |   |   |            | PCP:            |            |               |    |
| 2  | (HBV) infection?                             |   |   |            | 6(6,7.75)       |            |               |    |
| 3  | 49.Are there alternatives to steroids in     | - | - | All: 51.9% | All: 7(5,8)     | All: 50.0% | All: 6.5(5,8) | No |
| 4  | treating people with autoimmune              |   |   | HCP: 40.0% | HCP: 6(4,7)     | HCP: 35.7% | HCP:          |    |
| 5  | hepatitis (AIH)?                             |   |   | PCP: 66.7% | PCP: 7(6,9)     | PCP: 66.7% | 5.5(3.75,7)   |    |
| 6  |                                              |   |   |            |                 |            | PCP: 6.5(6,9) |    |
| 7  | 50.What impact does the home situation       | - | - | All: 34.5% | All: 5(3.5,7.5) | All: 32.1% | All: 5(4,7)   | No |
| 8  | have on recovery from chronic liver          |   |   | HCP: 13.3% | HCP: 4(3,6)     | HCP: 0.0%  | HCP:          |    |
| 9  | disease and its treatment?                   |   |   | PCP: 57.1% | PCP: 5(5,8)     | PCP: 64.3% | 4(3,5.25)     |    |
| 10 |                                              |   |   |            |                 |            | PCP: 5(5,8)   |    |
| 11 | 51.Does cure of hepatitis C provide          | - | - | All: 29.2% | All:            | All: 30.4% | All: 6(4,7)   | No |
| 12 | benefits to the patient outside reduction    |   |   | HCP: 33.3% | 5.5(3.25,7)     | HCP: 35.7% | HCP:          |    |
| 13 | in liver related complications?              |   |   | PCP: 22.2% | HCP: 5(3,7)     | PCP: 22.2% | 5.5(3,7.25)   |    |
| 14 |                                              |   |   |            | PCP:            |            | PCP:          |    |
| 15 |                                              |   |   |            | 5.5(4.5,6.5)    |            | 6(4.5,6.5)    |    |

1  
2  
3  
4  
5  
6  
7  
8  
9  
10  
11  
12  
13  
14  
15  
16  
17  
18  
19  
20  
21  
22  
23  
24  
25  
26  
27  
28  
29  
30  
31  
32  
33  
34  
35  
36  
37  
38  
39  
40  
41  
42  
43  
44  
45  
46

|                                                                                                                                                                                    |   |   |                                        |                                                      |                                        |                                                       |    |
|------------------------------------------------------------------------------------------------------------------------------------------------------------------------------------|---|---|----------------------------------------|------------------------------------------------------|----------------------------------------|-------------------------------------------------------|----|
| 52.How fast does liver fibrosis (scarring) actually progress in non-alcoholic liver disease patients and does this predict overall outcome?                                        | - | - | All: 62.1%<br>HCP: 40.0%<br>PCP: 85.7% | All: 7(6,8)<br>HCP: 6(5,8)<br>PCP:<br>7(7,8.25)      | All: 64.3%<br>HCP: 42.9%<br>PCP: 85.7% | All: 7.5(6,8)<br>HCP: 6(5,8)<br>PCP:<br>7.5(7,8.25)   | No |
| 53.Should direct-acting antiviral treatments therapies be made more easily accessible to GPs and drug service clinics for treatment of hepatitis C virus?                          | - | - | All: 50.0%<br>HCP: 46.7%<br>PCP: 55.6% | All: 6.5(3.5,7)<br>HCP: 6(3,7)<br>PCP:<br>6.5(5.5,8) | All: 52.2%<br>HCP: 50.0%<br>PCP: 55.6% | All: 7(5,7)<br>HCP:<br>6.5(4.5,7.25)<br>PCP: 7(5.5,8) | No |
| 54.Should patients diagnosed with liver fibrosis/cirrhosis related to NAFLD (non-alcoholic fatty liver disease) be offered more intensive nutritional support or dietician review? | - | - | All: 60.7%<br>HCP: 46.7%<br>PCP: 76.9% | All: 7(5,8)<br>HCP: 6(3,8)<br>PCP: 7(6.5,9)          | All: 63.0%<br>HCP: 50.0%<br>PCP: 76.9% | All: 7(5,8)<br>HCP: 7(4.5,8)<br>PCP:<br>7(6.5,8.5)    | No |
| 55.Why have there been no alternatives to surgery in the form of new drug                                                                                                          | - | - | All: 29.2%<br>HCP: 20.0%<br>PCP: 44.4% | All:<br>4.5(1.25,7)<br>HCP: 4(1,6)                   | All: 26.1%<br>HCP: 21.4%<br>PCP: 33.3% | All: 4(2,7)<br>HCP:                                   | No |

|                                                                                        |                                                                                                                                                                                                                         |   |   |                                        |                                                    |                                        |                                                          |    |
|----------------------------------------------------------------------------------------|-------------------------------------------------------------------------------------------------------------------------------------------------------------------------------------------------------------------------|---|---|----------------------------------------|----------------------------------------------------|----------------------------------------|----------------------------------------------------------|----|
| 1<br>2<br>3<br>4<br>5<br>6<br>7                                                        | treatments for gall bladder disease & biliary sludge?                                                                                                                                                                   |   |   |                                        | PCP:<br>4.5(2,7.5)                                 |                                        | 4(1.75,5.5)<br>PCP: 4(2,7.5)                             |    |
| 8<br>9<br>10<br>11<br>12<br>13<br>14<br>15<br>16<br>17<br>18                           | 56. Why is there no proper evidence-based research on nutrition as a way of managing gall bladder disease/biliary sludge?                                                                                               | - | - | All: 36.0%<br>HCP: 26.7%<br>PCP: 50.0% | All: 5(1.5,7)<br>HCP: 4(1,7)<br>PCP:<br>5(2.5,7.5) | All: 33.3%<br>HCP: 28.6%<br>PCP: 40.0% | All: 5(2,7)<br>HCP:<br>4.5(1.75,7)<br>PCP:<br>5(2.5,7.5) | No |
| 19<br>20<br>21<br>22<br>23<br>24<br>25<br>26<br>27<br>28<br>29<br>30<br>31             | 57. Why is there such variability in the natural progression of people with primary sclerosing cholangitis: some are very sick and require a transplant whereas others can remain relatively healthy for a long period? | - | - | All: 56.0%<br>HCP: 42.9%<br>PCP: 72.7% | All: 7(6,7)<br>HCP: 6(4,7)<br>PCP: 7(6,8)          | All: 54.2%<br>HCP: 38.5%<br>PCP: 72.7% | All: 7(6,7)<br>HCP: 6(4,7)<br>PCP: 7(6,8)                | No |
| 32<br>33<br>34<br>35<br>36<br>37<br>38<br>39<br>40<br>41<br>42<br>43<br>44<br>45<br>46 | 58. What are the warning signals that primary sclerosing cholangitis will be aggressive or cancerous?                                                                                                                   | - | - | All: 57.7%<br>HCP: 53.3%<br>PCP: 63.6% | All:<br>7(5.75,8.25)                               | All: 60.0%<br>HCP: 50.0%<br>PCP: 72.7% | All: 7(5.5,8)<br>HCP:                                    | No |



|                                                                                                                                                                                                  |   |   |                                        |                                              |                                        |                                                             |    |
|--------------------------------------------------------------------------------------------------------------------------------------------------------------------------------------------------|---|---|----------------------------------------|----------------------------------------------|----------------------------------------|-------------------------------------------------------------|----|
|                                                                                                                                                                                                  |   |   |                                        | HCP: 7(5,8)<br>PCP: 7(6,9)                   |                                        | 6.5(4.75,8)<br>PCP: 7(6,9)                                  |    |
| 59.Does information on the impact of the complication on the people's quality of life improve the patient's informed decision- making process about treatment of liver and gallbladder diseases? | - | - | All: 46.4%<br>HCP: 40.0%<br>PCP: 53.8% | All: 6(4,7)<br>HCP: 6(4,7)<br>PCP: 6(4.5,8)  | All: 44.4%<br>HCP: 35.7%<br>PCP: 53.8% | All: 6(4,7)<br>HCP: 5.5(4,7)<br>PCP: 6(5,8)                 | No |
| 60.Will clinical pathways developed with patients and HCP having an equal say result in greater patient satisfaction and health in people with liver and gallbladder diseases?                   | - | - | All: 44.8%<br>HCP: 33.3%<br>PCP: 57.1% | All: 6(4.5,8)<br>HCP: 5(4,8)<br>PCP: 6(5,8)  | All: 46.4%<br>HCP: 35.7%<br>PCP: 57.1% | All: 6(4.25,8)<br>HCP:<br>5(3.75,8)<br>PCP:<br>6(5.75,8.25) | No |
| 61.Should high school teenagers be educated about the risks of hepatitis C?                                                                                                                      | - | - | All: 53.8%<br>HCP: 40.0%<br>PCP: 72.7% | All: 7(3.75,8)<br>HCP: 5(2,7)<br>PCP: 7(6,9) | All: 57.7%<br>HCP: 42.9%<br>PCP: 75.0% | All:<br>7(4.75,7.25)<br>HCP: 5.5(2,7)                       | No |

|                                                                                                                                                                  |   |   |                                        |                                              |                                        |                                                     |    |
|------------------------------------------------------------------------------------------------------------------------------------------------------------------|---|---|----------------------------------------|----------------------------------------------|----------------------------------------|-----------------------------------------------------|----|
|                                                                                                                                                                  |   |   |                                        |                                              |                                        | PCP:<br>7(6.25,8.75)                                |    |
| 62.How can patients with end stage liver failure be better prepared for end of life. How can the HCP supporting them be better prepared to provide that support? | - | - | All: 65.5%<br>HCP: 46.7%<br>PCP: 85.7% | All: 7(6,8)<br>HCP: 6(5,8)<br>PCP: 7(7,9)    | All: 67.9%<br>HCP: 50.0%<br>PCP: 85.7% | All: 7(6,8)<br>HCP:<br>6.5(4.75,8)<br>PCP: 7(7,9)   | No |
| 63.Is aggressive control of inflammation on colonic inflammatory bowel disease in primary sclerosing cholangitis associated with improved liver outcomes?        | - | - | All: 48.0%<br>HCP: 46.7%<br>PCP: 50.0% | All: 6(5,7)<br>HCP: 6(5,7)<br>PCP: 6(6,8)    | All: 50.0%<br>HCP: 42.9%<br>PCP: 60.0% | All:<br>6.5(5.25,7)<br>HCP: 6(5,7)<br>PCP: 6.5(6,8) | No |
| 64.What is the best way to survey for cholangiocarcinoma in primary sclerosing cholangitis?                                                                      | - | - | All: 61.5%<br>HCP: 60.0%<br>PCP: 63.6% | All: 7(5.75,8)<br>HCP: 7(5,7)<br>PCP: 7(6,9) | All: 60.0%<br>HCP: 57.1%<br>PCP: 63.6% | All: 7(6,8)<br>HCP: 7(5,7)<br>PCP: 7(6,9)           | No |
| 65.Should the criteria for polycystic liver disease and transplantation be changed to take into account the size the liver                                       | - | - | All: 29.2%<br>HCP: 13.3%<br>PCP: 55.6% | All: 4.5(2,7)<br>HCP: 4(2,6)                 | All: 30.4%<br>HCP: 7.1%<br>PCP: 66.7%  | All: 6(3,7)<br>HCP: 4(2,6)<br>PCP: 6(6,7.5)         | No |

1  
2  
3  
4  
5  
6  
7  
8  
9  
10  
11  
12  
13  
14  
15  
16  
17  
18  
19  
20  
21  
22  
23  
24  
25  
26  
27  
28  
29  
30  
31  
32  
33  
34  
35  
36  
37  
38  
39  
40  
41  
42  
43  
44  
45  
46

|                                                                                                                         |   |   |                                        |                                                     |                                        |                                                                     |    |
|-------------------------------------------------------------------------------------------------------------------------|---|---|----------------------------------------|-----------------------------------------------------|----------------------------------------|---------------------------------------------------------------------|----|
| cysts can grow and the additional pressures on all the internal organs?                                                 |   |   |                                        | PCP:<br>4.5(5.5,7)                                  |                                        |                                                                     |    |
| 66.Does control of colitis at the time of liver transplant reduce the risk of recurrent primary sclerosing cholangitis? | - | - | All: 36.0%<br>HCP: 33.3%<br>PCP: 40.0% | All: 6(5,7)<br>HCP: 6(4,7)<br>PCP:<br>6(5,8.25)     | All: 33.3%<br>HCP: 28.6%<br>PCP: 40.0% | All: 6(5,7)<br>HCP:<br>6(3.75,7)<br>PCP:<br>6(5,8.25)               | No |
| 67.Are people with liver disease likely to develop other conditions, if so, what other conditions?                      | - | - | All: 42.9%<br>HCP: 13.3%<br>PCP: 76.9% | All: 6(3.25,7)<br>HCP: 5(2,6)<br>PCP:<br>6(6.5,8.5) | All: 46.4%<br>HCP: 14.3%<br>PCP: 78.6% | All:<br>6(3.25,7.75)<br>HCP:<br>4.5(2,5.25)<br>PCP:<br>6(6.75,8.25) | No |
| 68.Do people with liver disease have a reduced life expectancy?                                                         | - | - | All: 30.0%<br>HCP: 0.0%<br>PCP: 60.0%  | All: 5.5(3,8)<br>HCP: 4(1,5)<br>PCP: 5.5(6,9)       | All: 34.5%<br>HCP: 0.0%<br>PCP: 66.7%  | All: 6(3,8)<br>HCP:<br>3.5(1.75,5.25)                               | No |

|                                                                                                                                                       |   |   |                                        |                                           |                                        |                                                          |    |
|-------------------------------------------------------------------------------------------------------------------------------------------------------|---|---|----------------------------------------|-------------------------------------------|----------------------------------------|----------------------------------------------------------|----|
|                                                                                                                                                       |   |   |                                        |                                           |                                        | )<br>PCP: 6(6,9)                                         |    |
| 69.Should transjugular intrahepatic portosystemic shunt (TIPS) be used earlier in management of variceal haemorrhage?                                 | - | - | All: 51.9%<br>HCP: 53.3%<br>PCP: 50.0% | All: 7(5,7)<br>HCP: 7(5,8)<br>PCP: 7(5,7) | All: 55.6%<br>HCP: 57.1%<br>PCP: 53.8% | All: 7(6,7)<br>HCP:<br>7(5.75,8)<br>PCP: 7(5.5,7)        | No |
| 70.Should abnormal alanine transaminase (ALT) reference ranges be revised downwards in line with ACG (American College of Gastroenterology) guidance? | - | - | All: 36.0%<br>HCP: 33.3%<br>PCP: 40.0% | All: 6(5,7)<br>HCP: 6(5,7)<br>PCP: 6(5,7) | All: 37.5%<br>HCP: 35.7%<br>PCP: 44.4% | All: 6(5,7)<br>HCP:<br>6(4.5,7.25)<br>PCP:<br>6(5.875,7) | No |

a Questions from 49 to 70 were collected during the first round of Delphi.

b Consensus was reached when at least 80% of Delphi-panel members scored between 7 and 9 for the specific question.

Abbreviations:

HCP = Healthcare professionals

1  
2  
3 IQR = interquartile range  
4  
5

6 PCP = Patients, carers, and public  
7  
8

## 9 References

- 10  
11  
12 1. Majumdar A, Roccarina D, Thorburn D, Davidson BR, Tsochatzis E, Gurusamy KS. Management of people with early- or very early-stage  
13 hepatocellular carcinoma: an attempted network meta-analysis. The Cochrane database of systematic reviews. 2017;3:CD011650. Epub 2017/03/30. doi:  
14 10.1002/14651858.CD011650.pub2. PubMed PMID: 28351116.  
15  
16 2. Saffioti F, Gurusamy KS, Hawkins N, Toon CD, Tsochatzis E, Davidson BR, et al. Pharmacological interventions for primary sclerosing cholangitis: an  
17 attempted network meta-analysis. The Cochrane database of systematic reviews. 2017;3:CD011343. Epub 2017/04/19. doi:  
18 10.1002/14651858.CD011343.pub2. PubMed PMID: 28417463.  
19  
20 3. Lombardi R, Onali S, Thorburn D, Davidson BR, Gurusamy KS, Tsochatzis E. Pharmacological interventions for non-alcohol related fatty liver disease  
21 (NAFLD): an attempted network meta-analysis. The Cochrane database of systematic reviews. 2017;3:CD011640. Epub 2017/03/31. doi:  
22 10.1002/14651858.CD011640.pub2. PubMed PMID: 28358980.  
23  
24 4. Rodriguez-Peralvarez M, Guerrero-Misas M, Thorburn D, Davidson BR, Tsochatzis E, Gurusamy KS. Maintenance immunosuppression for adults  
25 undergoing liver transplantation: a network meta-analysis. The Cochrane database of systematic reviews. 2017;3:CD011639. Epub 2017/04/01. doi:  
26 10.1002/14651858.CD011639.pub2. PubMed PMID: 28362060.  
27  
28  
29  
30  
31  
32  
33  
34  
35  
36  
37  
38  
39  
40  
41  
42  
43  
44  
45  
46

- 1  
2  
3 5. Czaja AJ, Carpenter HA, Lindor KD. Ursodeoxycholic acid as adjunctive therapy for problematic type 1 autoimmune hepatitis: a randomised placebo-  
4 controlled treatment trial. *Hepatology (Baltimore, Md)*. 1999;30(6):1381-6. Epub 1999/11/26. doi: 10.1002/hep.510300603. PubMed PMID: 10573515.  
5  
6  
7 6. Manns MP, Woynarowski M, Kreisel W, Lurie Y, Rust C, Zuckerman E, et al. Budesonide induces remission more effectively than prednisone in a  
8 controlled trial of patients with autoimmune hepatitis. *Gastroenterology*. 2010;139(4):1198-206. Epub 2010/07/06. doi: 10.1053/j.gastro.2010.06.046.  
9 PubMed PMID: 20600032.  
10  
11  
12 7. Woynarowski M, Nemeth A, Baruch Y, Koletzko S, Melter M, Rodeck B, et al. Budesonide versus prednisone with azathioprine for the treatment of  
13 autoimmune hepatitis in children and adolescents. *The Journal of pediatrics*. 2013;163(5):1347-53.e1. Epub 2013/07/03. doi: 10.1016/j.jpeds.2013.05.042.  
14 PubMed PMID: 23810723.  
15  
16  
17 8. Saffioti F, Gurusamy KS, Eusebi LH, Tsochatzis E, Davidson BR, Thorburn D. Pharmacological interventions for primary biliary cholangitis: an  
18 attempted network meta-analysis. *The Cochrane database of systematic reviews*. 2017;3:CD011648. Epub 2017/03/30. doi:  
19 10.1002/14651858.CD011648.pub2. PubMed PMID: 28350426.  
20  
21  
22  
23  
24  
25  
26  
27  
28  
29  
30  
31  
32  
33  
34  
35  
36  
37  
38  
39  
40  
41  
42  
43  
44  
45  
46

# BMJ Open

## TOP RESEARCH PRIORITIES IN LIVER AND GALLBLADDER DISORDERS IN THE UNITED KINGDOM

|                                 |                                                                                                                                                                                                                                                                                                                                                                                                                                                                                                                                                                                                                                                                                                                                                                                                                                                                                                                                                                                                                                                                                                                                                                                                                          |
|---------------------------------|--------------------------------------------------------------------------------------------------------------------------------------------------------------------------------------------------------------------------------------------------------------------------------------------------------------------------------------------------------------------------------------------------------------------------------------------------------------------------------------------------------------------------------------------------------------------------------------------------------------------------------------------------------------------------------------------------------------------------------------------------------------------------------------------------------------------------------------------------------------------------------------------------------------------------------------------------------------------------------------------------------------------------------------------------------------------------------------------------------------------------------------------------------------------------------------------------------------------------|
| Journal:                        | <i>BMJ Open</i>                                                                                                                                                                                                                                                                                                                                                                                                                                                                                                                                                                                                                                                                                                                                                                                                                                                                                                                                                                                                                                                                                                                                                                                                          |
| Manuscript ID                   | bmjopen-2018-025045.R2                                                                                                                                                                                                                                                                                                                                                                                                                                                                                                                                                                                                                                                                                                                                                                                                                                                                                                                                                                                                                                                                                                                                                                                                   |
| Article Type:                   | Research                                                                                                                                                                                                                                                                                                                                                                                                                                                                                                                                                                                                                                                                                                                                                                                                                                                                                                                                                                                                                                                                                                                                                                                                                 |
| Date Submitted by the Author:   | 05-Feb-2019                                                                                                                                                                                                                                                                                                                                                                                                                                                                                                                                                                                                                                                                                                                                                                                                                                                                                                                                                                                                                                                                                                                                                                                                              |
| Complete List of Authors:       | Gurusamy, Kurinchi; University College London, Walmsley, Martine; PSC Support<br>Davidson, Brian; Royal Free London NHS Foundation Trust, HPB Surgery<br>Frier, Claire; Royal Free London NHS Foundation Trust, HPB Surgery<br>Fuller, Barry; University College London<br>Madden, Angela; University of Hertfordshire<br>Masson, Steven; Freeman Hospital<br>Morley, Richard; Cochrane Collaboration Consumer Network<br>Safarik, Ivana; Carolside Medical Centre<br>Tsochatzis, E; University College London<br>Ahmed, Irfan; NHS Grampian<br>Cowlin, Maxine; Patient representative<br>Dillon, John; University of Dundee Division of Cardiovascular and Diabetes Medicine, Liver Group<br>Ellicott, Graham; Patient representative<br>Elsharkawy, Ahmed; Queen Elizabeth Hospital Birmingham<br>Farrington, Liz; Royal Cornwall Hospitals NHS Trust<br>Glachan, Anthony; Patient representative<br>Kumar, Nagappan; University Hospital of Wales<br>Milne, EJ; Patient representative<br>Rushbrook, Simon; Norfolk and Norwich University Hospitals NHS Foundation Trust,<br>Smith, Amanda; Queen Elizabeth Hospital Birmingham<br>Stafford, Lizzie; John Radcliffe Hospital<br>Yeoman, Andrew; Royal Gwent Hospital |
| <b>Primary Subject Heading</b>: | Gastroenterology and hepatology                                                                                                                                                                                                                                                                                                                                                                                                                                                                                                                                                                                                                                                                                                                                                                                                                                                                                                                                                                                                                                                                                                                                                                                          |
| Secondary Subject Heading:      | Gastroenterology and hepatology                                                                                                                                                                                                                                                                                                                                                                                                                                                                                                                                                                                                                                                                                                                                                                                                                                                                                                                                                                                                                                                                                                                                                                                          |
| Keywords:                       | liver, chronic liver disease, research priorities                                                                                                                                                                                                                                                                                                                                                                                                                                                                                                                                                                                                                                                                                                                                                                                                                                                                                                                                                                                                                                                                                                                                                                        |
|                                 |                                                                                                                                                                                                                                                                                                                                                                                                                                                                                                                                                                                                                                                                                                                                                                                                                                                                                                                                                                                                                                                                                                                                                                                                                          |

SCHOLARONE™  
Manuscripts

# 1 TOP RESEARCH PRIORITIES IN LIVER AND

## 2 GALLBLADDER DISORDERS IN THE UNITED KINGDOM

3 Kurinchi S Gurusamy<sup>1</sup>, Martine Walmsley<sup>2</sup>, Brian R Davidson<sup>3</sup>, Claire Frier<sup>4</sup>, Barry Fuller<sup>5</sup>, Angela  
4 Madden<sup>6</sup>, Steven Masson<sup>7</sup>, Richard Morley<sup>8</sup>, Ivana Safarik<sup>9</sup>, Emmanuel A Tsochatzis<sup>10</sup>, Irfan Ahmed<sup>11</sup>,  
5 Maxine Cowlin<sup>12</sup>, John F Dillon<sup>13</sup>, Graham Ellicott<sup>12</sup>, Ahmed M Elsharkawy<sup>14</sup>, Liz Farrington<sup>15</sup>, Anthony  
6 Glachan<sup>12</sup>, Nagappan Kumar<sup>16</sup>, EJ Milne<sup>12</sup>, Simon M Rushbrook<sup>17</sup>, Amanda Smith<sup>18</sup>, Lizzie Stafford<sup>19</sup>,  
7 Andrew Yeoman<sup>20</sup>

8 <sup>1</sup>Professor of Evidence-based Medicine and Surgery, Division of Surgery and Interventional Science,  
9 University College London, United Kingdom

10 <sup>2</sup>Chair of Trustees, PSC Support, United Kingdom

11 <sup>3</sup>Professor of Surgery, Royal Free Campus, University College London, United Kingdom

12 <sup>4</sup>Cancer nurse specialist, HPB, Royal Free Hospital, London, United Kingdom

13 <sup>5</sup>Professor of Surgery, Royal Free Campus, University College London, United Kingdom

14 <sup>6</sup>Subject Group Lead for Nutrition and Dietetics, University of Hertfordshire, United Kingdom

15 <sup>7</sup>Consultant hepatologist, Freeman Hospital, Newcastle, United Kingdom

16 <sup>8</sup>James-Lind Alliance advisor

17 <sup>9</sup>General Practitioner, Carolside Medical Centre, Clarkston, Glasgow, United Kingdom

18 <sup>10</sup>Senior lecturer in Hepatology/Consultant hepatologist, UCL Institute for Liver and Digestive Health  
19 Royal Free Hospital and University College London, United Kingdom

20 <sup>11</sup>Professor of Surgery, NHS Grampian, Aberdeen, United Kingdom



- 1  
2  
3 21 <sup>12</sup>Patient and public representative, United Kingdom  
4  
5  
6 22 <sup>13</sup>Professor of Hepatology & Gastroenterology, NHS Tayside, Gastroenterology Dundee, UK  
7  
8  
9 23 <sup>14</sup>Consultant Hepatologist, Queen Elizabeth Hospital, Birmingham, United Kingdom  
10  
11  
12 24 <sup>15</sup>Consultant Nurse Hepatology, Royal Cornwall Hospital, Truro, United Kingdom  
13  
14  
15 25 <sup>16</sup>Consultant HPB Surgeon, University Hospital of Wales, Cardiff, United Kingdom  
16  
17  
18 26 <sup>17</sup>Consultant Hepatologist, Norfolk and Norwich University Hospital, Norwich, United Kingdom  
19  
20  
21 27 <sup>18</sup>Specialist Pharmacist – Liver, Queen Elizabeth Hospital, Birmingham, United Kingdom  
22  
23  
24 28 <sup>19</sup>Hepatology Research Nurse, John Radcliffe Hospital, Oxford, United Kingdom  
25  
26  
27 29 <sup>20</sup>Consultant Hepatologist, Royal Gwent Hospital, Newport, United Kingdom  
28  
29  
30 30 Corresponding author: Kurinchi S Gurusamy  
31  
32 31 Postal address: Floor 9, Royal Free Hospital, Royal Free Campus UCL, Rowland Hill Street, London  
33  
34 32 NW3 2PF; Email: [k.gurusamy@ucl.ac.uk](mailto:k.gurusamy@ucl.ac.uk)  
35  
36  
37 33 Word count: 3569  
38  
39  
40 34 Keywords: liver, chronic liver disease  
41  
42  
43  
44  
45  
46  
47  
48  
49  
50  
51  
52  
53  
54  
55  
56  
57  
58  
59  
60

## 35 ABSTRACT

36 Objectives: There is a mismatch between research questions considered important by patients,  
37 carers, and healthcare professionals and the research performed in many fields of medicine. The  
38 Non-Alcohol-Related Liver and gallbladder disorders Priority setting partnership (NARLIP) was  
39 established to identify the top research priorities in the prevention, diagnostic, and treatment of  
40 gallbladder disorders and liver disorders not covered by the James-Lind Alliance (JLA) Alcohol-related  
41 liver disease (ARLD) Priority Setting Partnership.

42 Design: The methods broadly followed the principles of the JLA guidebook. The one major deviation  
43 from the JLA methodology was the final step of identifying priorities: instead of prioritisation by  
44 group discussions at a consensus workshop involving stakeholders, the prioritisation was achieved  
45 by a modified Delphi consensus process.

46 Results: A total of 428 unique valid diagnostic or treatment research questions were identified. A  
47 literature review established that none of these questions were considered 'answered' i.e. high  
48 quality systematic reviews suggest that further research is not required on the topic. The Delphi  
49 panel achieved consensus (at least 80% Delphi panel members agreed) that a research question was  
50 a top research priority for six questions. Four additional research questions with highest proportion  
51 of Delphi panel members ranking the question as highly important were added to constitute the top  
52 10 research priorities.

53 Conclusions: A priority setting process involving patients, carers and healthcare professionals has  
54 been used to identify the top ten priority areas for research related to liver and gallbladder  
55 disorders. Basic, translational, clinical, and public health research are required to address these  
56 uncertainties.

57 Keywords: liver, chronic liver disease

1  
2  
3 58 Word count: 3618  
4  
5  
6

## 7 59 **ARTICLE SUMMARY**

8  
9  
10

### 11 60 **Strengths and limitations**

12  
13

- 14 61 • A research prioritisation process involving clinicians, patients and carer, and public  
15 62 representatives was performed in the field of liver and gallbladder disorders. This will help to  
16 63 address the mismatch between research questions that are considered important jointly by  
17 64 patients, carers, and healthcare professionals and the research performed in the field of liver  
18 65 and gallbladder disorders.
  - 19 66 • A Delphi consensus method was performed. This prevented dominance of 'loud voices', a  
20 67 problematic issue with small and large group discussions.
  - 21 68 • Because of the predominance of people with chronic liver disease on the Delphi panel, many  
22 69 of the top research priorities related to chronic liver diseases.
- 23  
24  
25  
26  
27  
28  
29  
30  
31  
32  
33  
34  
35  
36

## 37 70 **INTRODUCTION**

38  
39  
40

41 71 Failure to address treatment uncertainties by research can lead to significant suffering and deaths <sup>1</sup>.  
42 72 It is important that research in any field of medicine takes into account the shared interests of  
43 73 patients, carers and clinicians <sup>2</sup>. However, there is a mismatch between research questions that are  
44 74 considered important jointly by patients, carers, and healthcare professionals and the research  
45 75 performed in many fields of medicine <sup>3,4</sup>. The James Lind Alliance (JLA) exists to help ensure a  
46 76 patient-centred process and enables the limited research resources to be utilised in addressing the  
47 77 research questions that are considered important jointly by patients, carers, and healthcare  
48 78 professionals <sup>2</sup> ('top research priorities'). This is achieved by forming 'Priority Setting Partnerships'

49  
50  
51  
52  
53  
54  
55  
56  
57  
58  
59  
60

79 (PSPs) between patients, carers, and healthcare professionals<sup>2</sup>. Formal prioritisation of research  
80 topics jointly by patients and healthcare professionals can lead to increased research on the topic<sup>5,6</sup>.

81 There has only been one formal research prioritisation process involving patients, carers,  
82 and healthcare professionals in the field of liver and gallbladder disorders<sup>7</sup>. However, the scope of  
83 that PSP was limited to alcohol-related liver disorders<sup>7</sup>. The Non-Alcohol-Related Liver and  
84 gallbladder disorders Priority setting partnership (NARLIP) was established to address the  
85 prevention, diagnostic, and treatment uncertainties related to the majority of liver disorders which  
86 were not covered by the JLA PSP on alcohol-related liver diseases (ARLD)<sup>7</sup> and to include gallbladder  
87 disease.

88 The aims and objectives of the NARLIP were to work with patients, their carers, and  
89 healthcare professionals treating them ('stakeholders') to identify uncertainties about the diagnostic  
90 tests and effects of prevention and treatments for non-alcohol related liver and gallbladder  
91 disorders, to agree by consensus a prioritised list of those uncertainties for research, to publicise the  
92 results and process, and to take the results to research commissioning bodies to be considered for  
93 funding and researchers to encourage them to submit grant applications addressing these  
94 uncertainties.

## 95 METHODS

96 The methods broadly followed the principles of the JLA guidebook.<sup>8</sup> The broad steps involved the  
97 following and are summarised in Figure 1.

- 98 1. Formation of the partnership: organisations and individuals representing people affected by  
99 non-alcohol related liver or gallbladder disorders, their carers, and healthcare professionals  
100 treating people with non-alcohol related liver and gallbladder disorders. A partnership was  
101 formed between KG representing University College London and the British Liver Trust  
102 initially, but following reorganisation in the British Liver Trust, PSC Support<sup>9</sup> became the

1  
2  
3 103 leading patient organisation partner of this process. A steering committee was formed. The  
4  
5 104 members of the steering committee who participated in the complete process were KG,  
6  
7 105 MW, BRD, CF, BF, AM, RM, SM, IS, and ET.  
8  
9  
10 106 2. Establishment of the scope: the steering committee members discussed and decided that  
11  
12 107 the scope should include adult and paediatric liver and gallbladder disorders which required  
13  
14 108 medical and surgical treatments. The protocol was registered with James-Lind Alliance  
15  
16 109 Priority Setting Partnership.  
17  
18  
19 110 3. Identifying potential research questions: research questions were collected through online  
20  
21 111 surveys and searching UK Database of Uncertainties about the Effects of Treatments (UK  
22  
23 112 DUETs), research recommendations in high quality systematic reviews and clinical  
24  
25 113 guidelines, and registers of ongoing research.  
26  
27  
28 114 4. Refining research questions: the research questions identified in the above step were  
29  
30 115 reviewed and where necessary combined to result in a set of unique research questions.  
31  
32 116 Research questions were considered 'answered' when recent high-quality systematic  
33  
34 117 reviews (based on low risk of bias studies) concluded that further research was not required.  
35  
36 118 Removal of such 'answered' research questions was planned. The remaining questions were  
37  
38 119 'uncertainties'.  
39  
40  
41 120 5. Interim prioritisation: To shortlist the set of questions to manageable levels for the final  
42  
43 121 prioritisation process, the members of the steering committee ranked the uncertainties after  
44  
45 122 stratifying the questions as medical and surgical questions. The members of the steering  
46  
47 123 committee agreed that the interim prioritisation list should consist of 75% medical questions  
48  
49 124 and 25% surgical questions. This decision was an arbitrary decision made by the steering  
50  
51 125 committee based on the rationale that majority of individuals with liver and gallbladder  
52  
53 126 disorders are treated medically but a minority require surgery which have a major impact on  
54  
55 127 patients' lives.  
56  
57  
58  
59  
60

- 1  
2  
3 128 6. Final prioritisation by consensus: A modified Delphi consensus method was followed to  
4  
5 129 identify the top priorities using methods described by Jones et al <sup>10</sup>. The Delphi was  
6  
7 130 performed electronically using Excel for managing the process. The steps in the modified  
8  
9 Delphi consensus method were as follows.  
10 131  
11  
12 132 a. A Delphi panel consisting of patients, their carers, and healthcare professionals  
13  
14 133 treating them was formed. The Delphi panel was formed by using 'snowballing'  
15  
16 134 sampling methods and by contacting people through emails, online liver patient  
17  
18 135 forums (British Liver Trust Health Unlocked forum), and newsletters. A total of 42  
19  
20 136 people expressed interest in joining the Delphi panel and 33 panel members  
21  
22 137 completed all three rounds. Details of the Delphi panel composition and drop-outs  
23  
24 138 are reported in the results section.  
25  
26  
27 139 b. A total of three rounds were conducted.  
28  
29  
30 140 c. Delphi panel members scored the short-listed questions in the interim prioritisation  
31  
32 141 process on a scale of 1 to 9 with 1 being considered least important and 9 being  
33  
34 142 considered most important. Scores of 1 to 3 were categorised as 'less important', 4  
35  
36 143 to 6 as 'moderately important', and 7 to 9 as 'highly important'. Panel members  
37  
38 144 were requested to score the questions according to the importance of the question  
39  
40 145 to them/the persons that they represent or treat and could leave questions that  
41  
42 146 they were unable to score empty. Each Delphi panel member could add a maximum  
43  
44 147 of two questions in the first round to ensure that the questions most important to  
45  
46 148 the Delphi panel members were included in the prioritisation process even if they  
47  
48 149 were not identified in the earlier steps. In the subsequent rounds, the panel  
49  
50 150 members were shown the summary scores and their previous score for each  
51  
52 151 question. They were able to retain or change their score in each of the rounds after  
53  
54 152 the first round. For calculation of the summary scores and the proportion  
55  
56 153 considering a question 'highly important', non-responses were excluded.  
57  
58  
59  
60

- 1  
2  
3 154 d. Consensus about a specific research question being a top research priority was  
4  
5 155 reached when 80% or more Delphi panel members considered the research question  
6  
7 156 as highly important (allocated scores between 7 and 9).  
8  
9  
10 157 e. When fewer than 10 research priorities were obtained by consensus, the remaining  
11  
12 158 priorities were completed by uncertainties based on the highest proportions of  
13  
14 159 panel members agreeing that the research question was highly important (scores  
15  
16 160 between 7 and 9).  
17  
18  
19 161 f. There was no restriction on the Delphi panel to consult others while scoring the  
20  
21 162 questions. However, only one final response on the set of questions was accepted  
22  
23 163 from each Delphi panel member.  
24  
25

26 164 When there were no recent high-quality systematic reviews on the research question, we have  
27  
28 165 recommended high-quality systematic reviews. When recent high-quality systematic reviews  
29  
30 166 recommended high-quality research, we have recommended randomised controlled trials for  
31  
32  
33 167 prevention and treatment, as such studies carry the lowest risk of bias if conducted well; we would  
34  
35 168 have recommended well conducted diagnostic test accuracy studies for diagnostic uncertainties. All  
36  
37 169 online surveys were completed using Google Forms designed by KG. The Delphi process was  
38  
39 170 completed using Microsoft Excel and email.  
40  
41

42 171 Ethical approval was not deemed necessary because no personal identifiable information  
43  
44 172 was being collected, and the questions were being asked of healthcare professionals, patients and  
45  
46 173 their carers were not considered sensitive questions. In addition, we had full support of patient  
47  
48 174 organisations with involvement of patient representatives throughout the whole process rather than  
49  
50 175 patients visiting the hospitals.  
51  
52  
53  
54  
55  
56  
57  
58  
59  
60

## 176 Patient and Public involvement

177 Patients and public were involved in all aspects of this project: they were part of the steering  
178 committee and were involved in the definition of the scope, methodology used for the prioritisation  
179 process, identification of further patients and public representatives, participation in the Delphi  
180 panel, interpretation, and critical revisions of the draft report. They will be involved in the  
181 dissemination of the findings through patient websites, patient forums, and to research funders.

## 182 RESULTS

### 183 Identification and refining of research uncertainties

184 A total of 126 patients, carers, and those at risk of developing non-alcohol related liver and  
185 gallbladder disorders, and 13 healthcare professionals participated in the first survey which was  
186 conducted between July and December 2015. This survey resulted in a total of 209 unique research  
187 questions. In addition, 219 unique questions were identified from searching the UK DUETs, Pubmed,  
188 and ClinicalTrials.gov on 2<sup>nd</sup> January 2016. A total of 428 unique valid (i.e. falling within the remit of  
189 this priority setting partnership) research questions (247 medical-related and 181 surgery-related)  
190 were identified from these sources. None of the research questions had been answered by recent  
191 high-quality systematic reviews based on low risk of bias studies which concluded that further  
192 research was not required. Therefore, all the 428 research questions were considered research  
193 'uncertainties'. The complete list of 428 unique valid uncertainties in no particular order is available  
194 in Online Supplement Appendix 1. This has been converted to the population, intervention, control,  
195 and outcomes (PICO) format whenever possible.



## 196 Interim priorities

197 To identify a shortlist of questions (from the list of 429 questions) that were to be considered for the  
198 next step, a total of 48 research priorities (36 medical questions and 12 surgical questions) were  
199 identified on the basis of being selected by at least one patient or carer and healthcare professional  
200 of the steering committee (24 questions) and obtaining the highest ranks among the members of the  
201 steering committee (additional 24 questions). The list of 48 questions identified as interim priorities  
202 in no particular order is available in Online Supplement Appendix 2.

## 203 Final priorities

204 A total of 42 people expressed interest in joining the Delphi panel and 33 panel members completed  
205 all three rounds. Five people dropped out before they returned the scores of the first round (all  
206 patients, carers, and general public), three between first and second rounds (all healthcare  
207 professionals), and one between the second and third rounds (healthcare professional). Of the 33  
208 panel members who completed all the three rounds, 17 were healthcare professionals and 16 were  
209 patients, carers, and general public. Of the 17 healthcare professionals, six were hepatologists, four  
210 were surgeons, two were hepatology nurses, and the remaining were general practitioner (GP), HPB  
211 surgery (hepato-pancreato biliary) nurse, organ preservation biologist, dietician, and pharmacist  
212 (one each). Of the 16 patients, carers, and general public, there was representation from general  
213 public and various liver diseases including autoimmune diseases such as primary sclerosing  
214 cholangitis, primary biliary cholangitis, autoimmune hepatitis, viral hepatitis, metabolic diseases  
215 such as non-alcohol related fatty liver disease, and other diseases such as hepatocellular carcinoma  
216 and polycystic liver disease. There was also representation of liver transplanted patients in the  
217 Delphi panel. In total, 23 panel members were from England, seven were from Scotland, and three  
218 were from Wales. There were no panel members from Northern Ireland despite attempts to include  
219 panel members from Northern Ireland.

220 A total of 22 additional questions were added by the Delphi panel members in the first  
 221 round of the Delphi process. The Delphi panel achieved consensus that an uncertainty was a top  
 222 research priority for six research questions. Four additional research questions with the highest  
 223 proportion of Delphi panel members scoring the question as highly important (scores between 7 and  
 224 9) were added to constitute the top 10 research priorities. The list of the top 10 research priorities  
 225 (in the order of proportion who agreed that the uncertainty is a very important research priority) is  
 226 available in Table 1. All the top 10 research priorities were prevention and treatment uncertainties,  
 227 and none were diagnostic test uncertainties. None of the panel members thought the first two  
 228 questions as least important (scores of 1 to 3). For the remaining 8 questions, 3% to 6.5% of people  
 229 considered the questions to be least important (scores of 1 to 3).

230 **Table 1 Treatment uncertainties for which consensus that the uncertainty is a**  
 231 **research priority was reached**

| Treatment uncertainty (Research question)                                                                            | Proportion who rated this question as highly important in the final round | Median (interquartile range) in the final round |
|----------------------------------------------------------------------------------------------------------------------|---------------------------------------------------------------------------|-------------------------------------------------|
| What is the best treatment for people with early or very early hepatocellular carcinoma (HCC)?                       | 93.5%                                                                     | 8(7,9)                                          |
| What are the best treatments that cure or delay the progression (worsening) of primary sclerosing cholangitis (PSC)? | 93.3%                                                                     | 8(7,9)                                          |

|                                                                                        |                                                                                                                                                                                                                                                                                                          |       |           |
|----------------------------------------------------------------------------------------|----------------------------------------------------------------------------------------------------------------------------------------------------------------------------------------------------------------------------------------------------------------------------------------------------------|-------|-----------|
| 1<br>2<br>3<br>4<br>5<br>6<br>7<br>8<br>9                                              | What are the best treatments that cure or delay the progression (worsening) of non-alcohol-related fatty liver disease (NAFLD)?                                                                                                                                                                          | 90.3% | 9(8,9)    |
| 10<br>11<br>12<br>13<br>14                                                             | What is the best immunosuppressive regimen in adults undergoing liver transplantation?                                                                                                                                                                                                                   | 90.3% | 8(7,9)    |
| 15<br>16<br>17<br>18<br>19<br>20<br>21<br>22                                           | Should general public be educated about non-alcohol-related fatty liver disease (NAFLD) with an aim to reduce the numbers of those that have it?                                                                                                                                                         | 81.8% | 8(7,9)    |
| 23<br>24<br>25<br>26<br>27                                                             | What are the best treatments that cure or delay the progression (worsening) of autoimmune hepatitis (AIH)?                                                                                                                                                                                               | 80.6% | 8(7,9)    |
| 28<br>29<br>30<br>31<br>32<br>33<br>34                                                 | What are the best treatments that cure or delay the progression (worsening) of non-alcohol related steatohepatitis (NASH)?                                                                                                                                                                               | 76.7% | 8(6.75,9) |
| 35<br>36<br>37<br>38<br>39<br>40<br>41<br>42<br>43<br>44<br>45<br>46<br>47<br>48<br>49 | Prior to liver transplantation, is it better to transport the donor liver using a machine which pumps blood or preservation solution through the liver (machine perfusion) or is it better to transport it in the standard way of transporting it immersed in cold preservation solution (cold storage)? | 74.2% | 7(6,9)    |
| 50<br>51<br>52<br>53<br>54<br>55<br>56<br>57<br>58<br>59<br>60                         | What are the best treatments that cure or delay the progression (worsening) of primary biliary cholangitis (PBC)?                                                                                                                                                                                        | 74.2% | 7(6,8)    |

|                                                                                                 |       |        |
|-------------------------------------------------------------------------------------------------|-------|--------|
| Are there any treatments that reverse the liver damage in primary sclerosing cholangitis (PSC)? | 72.4% | 7(6,9) |
|-------------------------------------------------------------------------------------------------|-------|--------|

232

233 A summary of the availability of systematic review of randomised controlled trials on the topic of the  
 234 individual questions, randomised controlled trials on the topic not included in the systematic review  
 235 (if one exists), and the outcomes evaluated in these RCTs are listed in Table 2. Table 2 also contains a  
 236 suggestion for the next research steps. The list of the existing trials was compiled by searching  
 237 ClinicalTrials.gov on 7<sup>th</sup> April 2018. The references to the trials not included in the systematic reviews  
 238 is available in Online Supplement Appendix 3. As seen in Table 2, a well-designed RCT is the next  
 239 step for eight of these top 10 research questions. This is because it appears that the outcomes in  
 240 those trials will not address the outcomes listed in the research questions.

241 **Table 2 Next step to address the top 10 research priorities based on current**  
 242 **best evidence (summary)**

| Treatment uncertainty (Research question) | High-quality systematic review <sup>a,b</sup> | RCTs not included in the systematic review <sup>a,c</sup> | Patient-oriented outcomes assessed in trials not included in the systematic review <sup>d</sup> | Next step |
|-------------------------------------------|-----------------------------------------------|-----------------------------------------------------------|-------------------------------------------------------------------------------------------------|-----------|
|                                           |                                               |                                                           |                                                                                                 |           |

|                                                                                                                                                                                                                                                                                                                                                                                         |           |                 |                                                                                 |                                                                                                                                                 |
|-----------------------------------------------------------------------------------------------------------------------------------------------------------------------------------------------------------------------------------------------------------------------------------------------------------------------------------------------------------------------------------------|-----------|-----------------|---------------------------------------------------------------------------------|-------------------------------------------------------------------------------------------------------------------------------------------------|
| <p>1<br/>2<br/>3<br/>4<br/>5<br/>6<br/>7<br/>8<br/>9<br/>10<br/>11<br/>12<br/>13<br/>14<br/>15<br/>16<br/>17<br/>18<br/>19<br/>20<br/>21<br/>22<br/>23<br/>24<br/>25<br/>26<br/>27<br/>28<br/>29<br/>30<br/>31<br/>32<br/>33<br/>34<br/>35<br/>36<br/>37<br/>38<br/>39<br/>40</p> <p>What is the best treatment for people with early or very early hepatocellular carcinoma (HCC)?</p> | <p>11</p> | <p>8 trials</p> | <p>Survival (7 trials),<br/>recurrence (5 trials),<br/>morbidity (3 trials)</p> | <p>High-quality RCTs of interventions not covered in ongoing trials and comparison of health-related quality (HRQoL) in different treatment</p> |
| <p>41<br/>42<br/>43<br/>44<br/>45<br/>46<br/>47<br/>48<br/>49<br/>50<br/>51<br/>52<br/>53<br/>54<br/>55<br/>56<br/>57<br/>58<br/>59<br/>60</p> <p>What are the best treatments that cure or delay the progression (worsening) of primary sclerosing cholangitis (PSC)?</p>                                                                                                              | <p>12</p> | <p>9 trials</p> | <p>None of the trials include survival, HRQoL as outcomes<sup>e</sup></p>       | <p>High-quality RCTs with clinical outcomes (survival, HRQoL)</p>                                                                               |

|                                                                                                                                                                                                                                                                                                                                                                                                                                                                                                                                                                      |                                                       |                                                                                                                                                                                                                                 |                                                                                                                                                                                                                                                                                              |                                                                                                                                                                                                   |
|----------------------------------------------------------------------------------------------------------------------------------------------------------------------------------------------------------------------------------------------------------------------------------------------------------------------------------------------------------------------------------------------------------------------------------------------------------------------------------------------------------------------------------------------------------------------|-------------------------------------------------------|---------------------------------------------------------------------------------------------------------------------------------------------------------------------------------------------------------------------------------|----------------------------------------------------------------------------------------------------------------------------------------------------------------------------------------------------------------------------------------------------------------------------------------------|---------------------------------------------------------------------------------------------------------------------------------------------------------------------------------------------------|
| <p>1<br/>2<br/>3<br/>4<br/>5<br/>6<br/>7<br/>8<br/>9<br/>10<br/>11<br/>12<br/>13<br/>14<br/>15<br/>16<br/>17<br/>18<br/>19<br/>20<br/>21<br/>22<br/>23<br/>24<br/>25<br/>26<br/>27<br/>28<br/>29<br/>30<br/>31<br/>32<br/>33<br/>34<br/>35<br/>36<br/>37<br/>38<br/>39<br/>40<br/>41<br/>42<br/>43<br/>44<br/>45<br/>46<br/>47<br/>48<br/>49<br/>50<br/>51<br/>52<br/>53<br/>54<br/>55<br/>56<br/>57<br/>58<br/>59<br/>60</p> <p>What are the best treatments that cure or delay the progression (worsening) of non-alcohol-related fatty liver disease (NAFLD)?</p> | <p>13<br/>(include pharmacological interventions)</p> | <p>More than 10 published trials on lifestyle interventions and more than 20 trials on nutritional supplementation with no recent high-quality systematic reviews</p> <p><u>Pharmacological interventions</u><br/>44 trials</p> | <p>Lifestyle intervention studies and nutritional supplementation</p> <p>Not applicable as there are no high quality systematic reviews</p> <p><u>Pharmacological intervention studies</u><br/>Health-related quality of life (2 trials), resolution of fatty liver disease (11 trials),</p> | <p>High-quality systematic reviews on lifestyle interventions (one review) and nutritional supplementation to cure or delay the progression of NAFLD and high-quality RCTs on pharmacological</p> |
|----------------------------------------------------------------------------------------------------------------------------------------------------------------------------------------------------------------------------------------------------------------------------------------------------------------------------------------------------------------------------------------------------------------------------------------------------------------------------------------------------------------------------------------------------------------------|-------------------------------------------------------|---------------------------------------------------------------------------------------------------------------------------------------------------------------------------------------------------------------------------------|----------------------------------------------------------------------------------------------------------------------------------------------------------------------------------------------------------------------------------------------------------------------------------------------|---------------------------------------------------------------------------------------------------------------------------------------------------------------------------------------------------|

|                                                                                        |                                                              |                                                                                                                         |                                                                                                                                            |                                                                                                                              |
|----------------------------------------------------------------------------------------|--------------------------------------------------------------|-------------------------------------------------------------------------------------------------------------------------|--------------------------------------------------------------------------------------------------------------------------------------------|------------------------------------------------------------------------------------------------------------------------------|
|                                                                                        |                                                              |                                                                                                                         | mortality (2 trials), cirrhosis (2 trials), cardiovascular events (2 trials) <sup>e</sup>                                                  | interventions with clinical outcomes (survival, HRQoL)                                                                       |
| What is the best immunosuppressive regimen in adults undergoing liver transplantation? | <sup>14</sup><br>(covers only maintenance immunosuppression) | <u>Induction immunosuppression</u><br>More than 20 published trials<br><u>Maintenance immunosuppression</u><br>4 trials | <u>Induction immunosuppression</u><br>Not applicable as there is no high quality systematic review<br><u>Maintenance immunosuppression</u> | High-quality systematic review on induction immunosuppressive regimen and high-quality RCTs on maintenance immunosuppression |

|                                                                                                                                                  |      |           |                                                                                                         |                                                                        |
|--------------------------------------------------------------------------------------------------------------------------------------------------|------|-----------|---------------------------------------------------------------------------------------------------------|------------------------------------------------------------------------|
|                                                                                                                                                  |      |           | Graft survival (1 trial)<br>Adverse events (1 trial)<br>Hepatocellular carcinoma (1 trial) <sup>e</sup> | suppression with important clinical outcomes (overall survival, HRQoL) |
| Should general public be educated about non-alcohol-related fatty liver disease (NAFLD) with an aim to reduce the numbers of those that have it? | None | None      | -                                                                                                       | High-quality RCTs on education to prevent NAFLD                        |
| What are the best treatments that cure or delay the progression (worsening) of autoimmune hepatitis (AIH)?                                       | None | 15 trials | Survival (1 trial), health-related quality of life (1 trial) <sup>e</sup>                               | High quality RCTs with clinical outcomes (survival, HRQoL)             |



|                                                                                                                                                                                                                                                                                                                 |                                                                                                                                                             |                  |                                                                                                          |                                                                                                                              |
|-----------------------------------------------------------------------------------------------------------------------------------------------------------------------------------------------------------------------------------------------------------------------------------------------------------------|-------------------------------------------------------------------------------------------------------------------------------------------------------------|------------------|----------------------------------------------------------------------------------------------------------|------------------------------------------------------------------------------------------------------------------------------|
| <p>What are the best treatments that cure or delay the progression (worsening) of non-alcohol related steatohepatitis (NASH)?</p>                                                                                                                                                                               | <p>The evidence related to this question is covered under non-alcohol related fatty liver disease by performing a subgroup analysis of people with NASH</p> |                  |                                                                                                          |                                                                                                                              |
| <p>Prior to liver transplantation, is it better to transport the donor liver using a machine which pumps blood or preservation solution through the liver (machine perfusion) or is it better to transport it in the standard way of transporting it immersed in cold preservation solution (cold storage)?</p> | <p>None</p>                                                                                                                                                 | <p>5 trials</p>  | <p>Overall survival (4 trials), graft survival (5 trials), health-related quality of life (2 trials)</p> | <p>Await results of the RCTs (all expected to complete by the end of 2019) and perform a high quality systematic review.</p> |
| <p>What are the best treatments that cure or delay the progression (worsening) of primary biliary cholangitis (PBC)?</p>                                                                                                                                                                                        | <p><sup>15</sup></p>                                                                                                                                        | <p>24 trials</p> | <p>Health-related quality of life (5 trials), relief of</p>                                              | <p>High-quality RCTs with clinical outcomes</p>                                                                              |

|                                                                                                 |                                                                                                                                                                                                                                                                                                                                                                |  | symptoms<br>(5 trials) <sup>e</sup> | (survival,<br>HRQoL) |
|-------------------------------------------------------------------------------------------------|----------------------------------------------------------------------------------------------------------------------------------------------------------------------------------------------------------------------------------------------------------------------------------------------------------------------------------------------------------------|--|-------------------------------------|----------------------|
| Are there any treatments that reverse the liver damage in primary sclerosing cholangitis (PSC)? | The evidence related to this question is covered under treatments for primary sclerosing cholangitis. The systematic review did not include fibrosis as one of the outcomes. Nine of the trials included in the systematic review reported on fibrosis. Two of the trials not included in the systematic review (and listed above) reported on liver fibrosis. |  |                                     |                      |

243

244 a Numbers indicate the reference number.

245 b Further well-designed randomised controlled trials using clinical outcomes were recommended by  
246 all these systematic reviews.

247 c Ongoing trials, unpublished trials, or trials published since the search date for the systematic  
248 review when a high-quality systematic review based on randomised controlled trials exists. If no  
249 systematic reviews based on randomised controlled trials exist, these are either published trials or  
250 ongoing studies.

251 d This information is reported to find out whether the important patient-oriented outcomes are  
252 reported in the trials not covered by high-quality systematic reviews. This is to help with deciding  
253 whether new randomised controlled trials are necessary on the topic.

254 e The remaining trials reported treatment-related adverse events, composite outcomes and  
255 surrogate markers.

256

1  
2  
3 257 The complete list of questions in the Delphi process, the proportion of respondents who  
4  
5 258 considered a research question as very important and the summary scores in each Delphi round is  
6  
7 259 available in Online Supplement Appendix 4. This appendix also has the breakdown of the proportion  
8  
9 260 of patients, carers, and general public who considered a research question as very important and  
10  
11 261 their summary scores in each Delphi round along with similar summary measures for healthcare  
12  
13 262 professionals.

## 17 18 263 **DISCUSSION**

19  
20  
21  
22 264 This is the first priority setting partnership on non-alcohol related liver and gallbladder disorders.  
23  
24 265 This included a wide range of disease processes and a total of 428 unique research questions that  
25  
26 266 met the scope of this priority setting partnership were identified. All the research questions were  
27  
28 267 considered unanswered as there had been no high quality systematic reviews which indicated that  
29  
30 268 no further research is required, i.e. all the research questions were uncertainties. Consensus that an  
31  
32 269 uncertainty was a very important research priority was reached for six research questions. Four  
33  
34 270 additional research questions with the highest proportion of Delphi panel members ranking the  
35  
36 271 question as highly important were added to constitute the top 10 research priorities.

37  
38  
39  
40 272 As evident from the online supplement Appendix 1, longevity of life and health-related  
41  
42 273 quality of life are two major outcomes that appear important to patients, their carers, and  
43  
44 274 healthcare professionals. However, even when there are ongoing trials, it appears that the outcomes  
45  
46 275 in those trials will not address the outcomes listed in eight of the top 10 research questions (Table  
47  
48 276 2). Therefore, the next step in addressing these uncertainties is the design and conduct of  
49  
50 277 randomised controlled trials. Such randomised controlled trials may involve qualitative studies to  
51  
52 278 determine the design and should compare the treatments that improve the longevity of life and/or  
53  
54 279 health-related quality of life.

1  
2  
3 280 It should be noted that uncertainties ‘what are the best treatments that cure or delay the  
4  
5 281 progression (worsening) of non-alcohol-related fatty liver disease (NAFLD)?’ and ‘what are the best  
6  
7 282 treatments that cure or delay the progression (worsening) of non-alcohol related steatohepatitis  
8  
9 283 (NASH)?’ are related to each other. Although NAFLD includes NASH, most of the panel members felt  
10  
11 284 that the research questions related to NAFLD and NASH should be kept separate uncertainties.  
12  
13  
14 285 While the same systematic review can cover both the uncertainties, the primary research study  
15  
16 286 designed to address these two questions differ in terms of the setting, the outcomes used, and the  
17  
18 287 period of follow-up. Any primary research that tries to answer these two questions in a single  
19  
20 288 randomised controlled trial will be inefficient.

21  
22  
23 289 Similarly, for the uncertainties ‘what are the best treatments that cure or delay the  
24  
25 290 progression (worsening) of primary sclerosing cholangitis (PSC)’ and ‘are there any treatments that  
26  
27 291 reverse the liver damage in primary sclerosing cholangitis (PSC)?’, a single randomised controlled  
28  
29 292 trial will be inefficient and the preference of most of the panel members was to keep these  
30  
31 293 uncertainties as separate uncertainties.

32  
33  
34 294 There are several limitations to our priority setting process. The first one is deviation from  
35  
36 295 the original protocol. To select the final top priorities, the initial plan was to arrive at consensus by  
37  
38 296 open small group and large group discussions of patients, carers, and healthcare professionals as  
39  
40 297 suggested by the standard James-Lind Alliance process<sup>8</sup>, which provides an opportunity for a  
41  
42 298 knowledge exchange of viewpoints and experience. However, part of the steering committee with  
43  
44 299 experience in a similar priority setting partnership felt that open discussions resulted in ‘loud voices’  
45  
46 300 being given more importance resulting in an unrepresentative list of top priorities. While this can be  
47  
48 301 mitigated by facilitated group discussions by neutral JLA facilitators to ensure that all voices were  
49  
50 302 heard in the discussions, this was considered by the steering committee as an important source of  
51  
52 303 bias based on their prior experience in participating in open discussions. The steering committee  
53  
54 304 therefore decided to follow the Delphi-consensus method which is one of the major consensus  
55  
56 305 methods<sup>10</sup>. The advantages of Delphi-consensus method over open discussions include anonymity of  
57  
58  
59  
60

1  
2  
3 306 the response and the equal weight given to the opinions of all members <sup>10</sup>. In addition, they are less  
4  
5 307 costly to conduct without any limitation by geographical location compared to other methods of  
6  
7 308 consensus<sup>10</sup> because of the lack of necessity to travel and take time off regular work. However, there  
8  
9  
10 309 is considerable variability in the previous performance of Delphi processes with regards to the  
11  
12 310 number of rounds and the criteria for achieving consensus <sup>16</sup>. Arriving at consensus depends upon  
13  
14 311 people revising their scores based on the other's scores. Our initial plan was to extend the Delphi to  
15  
16 312 four rounds if consensus on 10 top research priorities was not reached in three rounds. However,  
17  
18 313 there was minimal change in scores between the rounds for most questions (Online Supplement  
19  
20 314 Appendix 3) and the Delphi process was completed in three rounds. Consensus on a top research  
21  
22 315 priority was achieved for six questions only. However, the proportion of Delphi panel members  
23  
24 316 ranking a question as highly important was greater than 70% for the remaining four questions added  
25  
26 317 to the list of top research priorities. Previous Delphi consensus processes have used various cut-off  
27  
28 318 points for defining consensus: greater than 70% agreement among panel members is well within the  
29  
30 319 definition of consensus used in previous Delphi consensus processes <sup>16</sup>.

35 320 The other major limitation of our priority setting process is the representativeness of the  
36  
37 321 people who completed the survey and took part in the Delphi process. The online survey was shared  
38  
39 322 among clinicians and members of general and disease-specific patient organisations. Most questions  
40  
41 323 resulting from the online survey relate to chronic liver disease (in particular, autoimmune liver  
42  
43 324 diseases), perhaps reflecting the high motivation to support research from those groups. The Delphi  
44  
45 325 panel also had a high representation of people related to chronic liver disease (in particular,  
46  
47 326 autoimmune liver diseases) as patients, carers, or healthcare professionals. Whilst people affected  
48  
49 327 by different liver and gallbladder disorders were actively sought through both general and disease-  
50  
51 328 specific patient support groups and organisations, only a few responded and completed all three  
52  
53 329 rounds of the Delphi process. The potential bias towards prioritising chronic liver diseases is evident  
54  
55 330 as nine of the top 10 research priorities relate to chronic liver diseases (four relate to autoimmune  
56  
57 331 liver diseases, three related to non-alcohol related fatty liver disease, two related to liver

1  
2  
3 332 transplantation). It was surprising that the uncertainties related to the treatment of chronic viral  
4  
5 333 diseases such as chronic hepatitis B and chronic hepatitis C were not identified within the top 10  
6  
7 334 research priorities. This may be because of the perception by the some of the panel members that  
8  
9 335 the research questions related to the treatment of chronic hepatitis C were answered with the  
10  
11 336 advent of directly acting antivirals (personal communication). The reason for non-prioritisation of  
12  
13 337 chronic hepatitis B is not entirely clear. This may be because chronic hepatitis B may not have been  
14  
15 338 considered as important as other chronic liver diseases or under-representation of chronic hepatitis  
16  
17 339 B in the panel.

20  
21 340 Cancer-related questions, childhood-related liver diseases, and other benign disorders did  
22  
23 341 not end up in the top research priorities (except for the treatment of very early hepatocellular  
24  
25 342 carcinoma, which is managed by hepatologists and surgeons) probably for the reasons described  
26  
27 343 above. We recommend that separate prioritisation processes are carried out for people with  
28  
29 344 gallstones, a condition that affects approximately 5% to 25% of the population <sup>17</sup>, for people with  
30  
31 345 primary and secondary liver cancer, and childhood liver disorders where significant uncertainties  
32  
33 346 remain on the effectiveness of different treatments in decreasing mortality and improving health-  
34  
35 347 related quality of life.

36  
37 348 As well as the above limitation, we are aware of the inherent limitations of using solely  
38  
39 349 technology to carry out the Delphi exercise. These are limitations that can potentially lead to bias in  
40  
41 350 any consensus-building method including that of face-to-face consensus methods normally used in a  
42  
43 351 JLA PSP.

44  
45 352 One solution which might address the limitations of this priority setting process and the  
46  
47 353 standard JLA process may be to collect information routinely from patients visiting hospitals using  
48  
49 354 paper forms and conduct online meetings (video conferencing and presentation) before the final  
50  
51 355 round of the Delphi (or the standard face-to-face priority setting workshop used by the JLA. Some  
52  
53 356 JLA PSPs do use methods such as face-to face interviews and group discussions rather than solely  
54  
55  
56  
57  
58  
59  
60

1  
2  
3 357 online surveys). By collecting information on paper forms and conducting the meetings in hospitals,  
4  
5 358 it is possible to engage with people who do not have access to or are not familiar with computers. It  
6  
7 359 is also possible to engage with people who have concerns regarding data confidentiality with the use  
8  
9  
10 360 of computers or social media by collecting information using paper forms. Ethical and confidentiality  
11  
12 361 issues will need to be considered prior to engaging patients attending hospital in the research  
13  
14 362 prioritisation process.

17 363 Another limitation of our priority setting process is the drop-outs during the Delphi process.  
18  
19 364 While some of the drop-outs may be related to the ability to complete online surveys and use  
20  
21 365 Microsoft Excel, some patient representatives or clinicians may have dropped out because they did  
22  
23 366 not find any research question to be of direct relevance to them. Other reasons include lack of  
24  
25 367 understanding of the conditions, feeling that the process was too complicated, feeling that the  
26  
27 368 process would not work, and the time commitment for the process. This is because of the broad  
28  
29 369 scope of this research prioritisation process and may be overcome by choosing a narrower focus  
30  
31 370 while defining the scope of the prioritisation process, and by better explanation of the disease  
32  
33 371 processes through presentations.

38 372 It should also be recognised that the Delphi panel was constituted of representatives from  
39  
40 373 England, Scotland, and Wales. Therefore, the findings are applicable in only these countries.  
41  
42 374 However, the findings are likely to be applicable throughout the NHS and in other European and  
43  
44 375 Western countries with a similar spectrum of chronic liver diseases and similar treatment options  
45  
46 376 available.

50 377 In summary, there are significant uncertainties in the management of liver and gallbladder  
51  
52 378 disorders. Further high-quality research is necessary to address these uncertainties which may  
53  
54 379 require programmes of basic, translational, clinical, and public health research. For issues with  
55  
56 380 diverse and unproven treatment options, randomised controlled trials may be the only mechanism  
57  
58 381 for identifying the most effective treatment and the treatments that represent good value for  
59  
60

1  
2  
3 382 money for the NHS. Such randomised controlled trials should assess the effect of different  
4  
5 383 treatments in improving longevity of life and/or health-related quality of life.  
6  
7  
8

## 9 384 **ACKNOWLEDGEMENTS**

10  
11  
12  
13 385 We thank Mr Andrew Langford, previous Chief Executive of British Liver Trust, participants in the  
14  
15 386 survey, Ms Caroline Whiting and Ms Beccy Maeso, JLA PSP co-ordinators for their advice on the  
16  
17 387 process and comments on the manuscript, and the Delphi panel members who preferred to remain  
18  
19 388 anonymous in contributing to this research prioritisation process.  
20  
21  
22

## 23 389 **FUNDING**

24  
25  
26  
27  
28 390 There was no external funding.  
29  
30

## 31 391 **CONTRIBUTION OF AUTHORS**

32  
33  
34  
35  
36 392 Kurinchi Gurusamy – conceptualisation, healthcare professional and methodological lead of steering  
37  
38 393 committee, Delphi panel member, analysis, author of the manuscript.  
39

40  
41 394 Martine Walmsley – Patients and carers lead of steering committee, Delphi panel member  
42

43  
44 395 Brian Davidson, Claire Frier, Barry Fuller, Angela Madden, Steven Masson, Ivana Safarik, Emmanouil  
45

46 396 Tsochatzis – Steering committee, Delphi panel member, suggested revisions to the manuscript  
47

48  
49 397 Richard Morley – Steering committee, JLA advisor  
50

51  
52 398 Irfan Ahmed, Maxine Cowlin, John Dillon, Graham Ellicott, Ahmed Elsharkawy, Liz Farrington,  
53

54 399 Anthony Glachan, Nagappan Kumar, EJ Milne, Simon Rushbrook, Amanda Smith, Lizzie Stafford,  
55

56 400 Andrew Yeoman – Delphi panel member, suggested revisions to the manuscript  
57  
58  
59  
60



## 401 CONFLICTS OF INTEREST

402 The decisions made by healthcare professionals involved in the research prioritisation process might  
403 have been influenced by their professional interests, in addition to their own, or family member's  
404 experience of health conditions. Decisions made by patients and carers in the research prioritisation  
405 process might have been influenced by their particular experiences, health needs and interests.

## 406 DATA SHARING AGREEMENT

407 All data is available in the manuscript or in the supplementary file.

## 408 FIGURE 1

### 409 Research prioritisation steps

410 The major steps in the research prioritisation are shown in the figure.

411 <sup>a</sup>The protocol was registered with James-Lind Alliance Priority Setting Partnership

412 <sup>b</sup>The final prioritisation was achieved by modified Delphi consensus method.

## 413 REFERENCES

- 414 1. Chalmers I. Confronting therapeutic ignorance. *BMJ* 2008;337:a841. doi:  
415 10.1136/bmj.39555.392627.80 [published Online First: 2008/07/18]
- 416 2. James Lind Alliance Priority Setting Partnerships. About the James Lind Alliance.  
417 <http://www.jlanihracuk/about-the-james-lind-alliance/> (accessed 6th April 2018) 2018

- 1  
2  
3 418 3. Crowe S, Fenton M, Hall M, et al. Patients', clinicians' and the research communities' priorities for  
4  
5 419 treatment research: there is an important mismatch. *Research Involvement and Engagement*  
6  
7 420 2015;1(1):2. doi: 10.1186/s40900-015-0003-x  
8  
9  
10 421 4. Tallon D, Chard J, Dieppe P. Relation between agendas of the research community and the  
11  
12 422 research consumer. *The Lancet*;355(9220):2037-40. doi: 10.1016/S0140-6736(00)02351-5  
13  
14 423 5. James Lind Alliance Priority Setting Partnerships. Tinnitus PSP: What's happening to address the  
15  
16 424 priorities more than 4 years later? [http://www.jlanihracuk/news/tinnitus-psp-whats-](http://www.jlanihracuk/news/tinnitus-psp-whats-happening-to-address-the-priorities-more-than-4-years-later/5299)  
17  
18 425 [happening-to-address-the-priorities-more-than-4-years-later/5299](http://www.jlanihracuk/news/tinnitus-psp-whats-happening-to-address-the-priorities-more-than-4-years-later/5299) (accessed on 2 December  
19  
20 426 2018) 2017  
21  
22  
23 427 6. National Institute for Health Research. Adding value in research 1: Identifying important research  
24  
25 428 topics. <https://www.nihracuk/about-us/documents/pillar-1-identifying-researchpdf> (accessed  
26  
27 429 on 2 December 2018) 2018  
28  
29  
30 430 7. James Lind Alliance Priority Setting Partnerships. Alcohol-related liver disease.  
31  
32 431 <http://www.jlanihracuk/priority-setting-partnerships/alcohol-related-liver-disease/> (accessed  
33  
34 432 6th April 2018) 2018  
35  
36  
37 433 8. James Lind Alliance Priority Setting Partnerships. JLA guidebook. [http://www.jlanihracuk/jla-](http://www.jlanihracuk/jla-guidebook/)  
38  
39 434 [guidebook/](http://www.jlanihracuk/jla-guidebook/) (accessed 6th April 2018) 2018  
40  
41 435 9. PSC Support. Welcome to PSC Support, dedicated to helping people affected by primary sclerosing  
42  
43 436 cholangitis. <https://www.pscsupportorguk/> (accessed 6th April 2018) 2018  
44  
45  
46 437 10. Jones J, Hunter D. Consensus methods for medical and health services research. *BMJ*  
47  
48 438 1995;311(7001):376-80.  
49  
50 439 11. Majumdar A, Roccarina D, Thorburn D, et al. Management of people with early- or very early-  
51  
52 440 stage hepatocellular carcinoma: an attempted network meta-analysis. *The Cochrane*  
53  
54 441 *database of systematic reviews* 2017;3:CD011650. doi: 10.1002/14651858.CD011650.pub2  
55  
56 442 [published Online First: 2017/03/30]  
57  
58  
59  
60

- 1  
2  
3 443 12. Saffioti F, Gurusamy KS, Hawkins N, et al. Pharmacological interventions for primary sclerosing  
4  
5 444 cholangitis: an attempted network meta-analysis. *The Cochrane database of systematic*  
6  
7 445 *reviews* 2017;3:CD011343. doi: 10.1002/14651858.CD011343.pub2 [published Online First:  
8  
9 446 2017/04/19]
- 10  
11  
12 447 13. Lombardi R, Onali S, Thorburn D, et al. Pharmacological interventions for non-alcohol related  
13  
14 448 fatty liver disease (NAFLD): an attempted network meta-analysis. *The Cochrane database of*  
15  
16 449 *systematic reviews* 2017;3:CD011640. doi: 10.1002/14651858.CD011640.pub2 [published  
17  
18 450 Online First: 2017/03/31]
- 19  
20  
21 451 14. Rodriguez-Peralvarez M, Guerrero-Misas M, Thorburn D, et al. Maintenance immunosuppression  
22  
23 452 for adults undergoing liver transplantation: a network meta-analysis. *The Cochrane database*  
24  
25 453 *of systematic reviews* 2017;3:CD011639. doi: 10.1002/14651858.CD011639.pub2 [published  
26  
27 454 Online First: 2017/04/01]
- 28  
29  
30 455 15. Saffioti F, Gurusamy KS, Eusebi LH, et al. Pharmacological interventions for primary biliary  
31  
32 456 cholangitis: an attempted network meta-analysis. *The Cochrane database of systematic*  
33  
34 457 *reviews* 2017;3:CD011648. doi: 10.1002/14651858.CD011648.pub2 [published Online First:  
35  
36 458 2017/03/30]
- 37  
38  
39 459 16. Diamond IR, Grant RC, Feldman BM, et al. Defining consensus: a systematic review recommends  
40  
41 460 methodologic criteria for reporting of Delphi studies. *J Clin Epidemiol* 2014;67(4):401-9. doi:  
42  
43 461 10.1016/j.jclinepi.2013.12.002 [published Online First: 2014/03/04]
- 44  
45  
46 462 17. Gurusamy KS, Davidson BR. Gallstones. *BMJ* 2014;348:g2669. doi: 10.1136/bmj.g2669
- 47  
48  
49  
50 463  
51  
52  
53  
54  
55  
56  
57  
58  
59  
60



Figure 1: Research prioritisation steps

The major steps in the research prioritisation are shown in the figure.

<sup>a</sup>The protocol was registered with James-Lind Alliance Priority Setting Partnership

<sup>b</sup>The final prioritisation was achieved by modified Delphi consensus method.

119x177mm (300 x 300 DPI)

## Appendix 1 List of all research questions

| Patient/population                               | Intervention                                 | Control         | Outcomes                                                                                                                                                                               |
|--------------------------------------------------|----------------------------------------------|-----------------|----------------------------------------------------------------------------------------------------------------------------------------------------------------------------------------|
| People with obesity                              | Lifestyle: diet                              | No intervention | <ol style="list-style-type: none"> <li>1. Liver transplantation</li> <li>2. Improvement in BMI.</li> <li>3. Improved liver function</li> </ol>                                         |
| People with liver disease                        | Nurse-led care                               | Standard care   | Ability to self-manage                                                                                                                                                                 |
| People with asymptomatic chronic liver disease   | Education of people                          | No intervention | <ol style="list-style-type: none"> <li>1. Improvement in life style.</li> <li>2. Fatty liver disease</li> </ol>                                                                        |
| People with NASH (non-alcoholic steatohepatitis) | Different medical treatments                 | No intervention | <ol style="list-style-type: none"> <li>1. Halting disease progression.</li> <li>2. Reversing disease progression.</li> <li>3. Slowing disease progression.</li> <li>4. Cure</li> </ol> |
| People with primary sclerosing cholangitis       | Treatment for primary sclerosing cholangitis | No intervention | <ol style="list-style-type: none"> <li>1. Mortality</li> <li>2. HRQoL (health-related quality of life)</li> </ol>                                                                      |

1  
2  
3  
4  
5  
6  
7  
8  
9  
10  
11  
12  
13  
14  
15  
16  
17  
18  
19  
20  
21  
22  
23  
24  
25  
26  
27  
28  
29  
30  
31  
32  
33  
34  
35  
36  
37  
38  
39  
40  
41  
42  
43  
44  
45  
46  
47  
48  
49  
50  
51  
52  
53  
54  
55  
56  
57  
58  
59  
60

For peer review only

|                           |                                                                    |                |                                                                                                                                                                                                                                                                                                                                                                                                                      |
|---------------------------|--------------------------------------------------------------------|----------------|----------------------------------------------------------------------------------------------------------------------------------------------------------------------------------------------------------------------------------------------------------------------------------------------------------------------------------------------------------------------------------------------------------------------|
|                           |                                                                    |                | <ul style="list-style-type: none"> <li>3. Fewer symptoms - pain, itching, fatigue</li> <li>4. improved liver function</li> <li>5. Cure</li> <li>6. Time to liver transplantation</li> <li>7. Improvement (no further details)</li> <li>8. Decreased hospital admission</li> <li>9. Disease progression</li> <li>10. Remission from PSC</li> <li>11. Cancer</li> <li>12. Requirement for liver transplant.</li> </ul> |
| People with liver disease | Methods to improve compliance to treatment                         | Not applicable | <ul style="list-style-type: none"> <li>1. HRQoL</li> <li>2. Mortality</li> </ul>                                                                                                                                                                                                                                                                                                                                     |
| General population        | Screening: early identification of people at risk of liver disease | No screening   | <ul style="list-style-type: none"> <li>1. HRQoL</li> <li>2. Mortality</li> </ul>                                                                                                                                                                                                                                                                                                                                     |

|                                                                                                                                                                                                                                                                                                                                                                                      |                                                                     |                       |                                                                                                                                                                                                            |
|--------------------------------------------------------------------------------------------------------------------------------------------------------------------------------------------------------------------------------------------------------------------------------------------------------------------------------------------------------------------------------------|---------------------------------------------------------------------|-----------------------|------------------------------------------------------------------------------------------------------------------------------------------------------------------------------------------------------------|
| <p>1<br/>2<br/>3<br/>4<br/>5<br/>6<br/>7<br/>8<br/>9<br/>10<br/>11<br/>12<br/>13<br/>14<br/>15<br/>16<br/>17<br/>18<br/>19<br/>20<br/>21<br/>22<br/>23<br/>24<br/>25<br/>26<br/>27<br/>28<br/>29</p> <p>People at risk of liver disease</p>                                                                                                                                          | <p>Diagnosis: early identification of people with liver disease</p> | <p>Not applicable</p> | <p>1. HRQoL<br/>2. Mortality<br/>3. Prevention of liver disease<br/>4. Slowing progression of liver disease<br/>5. Reducing requirement for liver transplantation<br/>6. Adverse events of medications</p> |
| <p>30<br/>31<br/>32<br/>33<br/>34<br/>35<br/>36<br/>37<br/>38<br/>39<br/>40<br/>41<br/>42<br/>43<br/>44<br/>45<br/>46<br/>47<br/>48<br/>49<br/>50<br/>51<br/>52<br/>53<br/>54<br/>55<br/>56<br/>57<br/>58<br/>59<br/>60</p> <p>People with primary sclerosing cholangitis and who have had a liver transplant and still have ulcerative colitis even after a sub total colectomy</p> | <p>Symptomatic treatment for primary sclerosing cholangitis</p>     | <p>Not applicable</p> | <p>1. HRQoL.<br/>2. Decrease in symptoms (breathlessness and fatigue).<br/>3. Mortality.<br/>4. Decrease in medication.<br/>5. Cure.<br/>6. Decreased progression of primary sclerosing cholangitis.</p>   |

|                                                       |                                                                                      |                |                                                                                                                                                                                                                                                 |
|-------------------------------------------------------|--------------------------------------------------------------------------------------|----------------|-------------------------------------------------------------------------------------------------------------------------------------------------------------------------------------------------------------------------------------------------|
|                                                       |                                                                                      |                | 7. Improvement in symptoms (unspecified).                                                                                                                                                                                                       |
| People at risk of liver disease (overweight or obese) | Diagnosis: Accurate non-invasive method for diagnosis of chronic liver disease       | Not applicable | <ol style="list-style-type: none"> <li>1. Death</li> <li>2. Need for liver transplant</li> <li>3. Requirement for hospital admission.</li> <li>4. Demonstrating equivalence to biopsy</li> <li>5. Demonstrating good reproducibility</li> </ol> |
| People at risk of liver disease (overweight or obese) | Screening methods to diagnose liver disease (including history and diagnostic tests) | Not applicable | <ol style="list-style-type: none"> <li>1. Proportion of people at risk of liver disease</li> <li>2. Proportion of people at risk who have asymptomatic liver fibrosis</li> <li>3. Early diagnosis and treatment</li> </ol>                      |
| People with polycystic liver disease                  | Treatment for polycystic disease                                                     | Not applicable | <ol style="list-style-type: none"> <li>1. Decrease symptoms</li> <li>2. Increase quality of</li> </ol>                                                                                                                                          |



|                                         |                                             |                       |                                                                                                                                                                                                                                                                                                                                                               |
|-----------------------------------------|---------------------------------------------|-----------------------|---------------------------------------------------------------------------------------------------------------------------------------------------------------------------------------------------------------------------------------------------------------------------------------------------------------------------------------------------------------|
|                                         |                                             |                       | <p>life</p> <p>3. Decrease size of cyst or preventing cysts to enlarge</p> <p>4. Increased longevity</p> <p>5. Requirement for liver transplant.</p>                                                                                                                                                                                                          |
| <p>People with autoimmune hepatitis</p> | <p>Treatments for autoimmune hepatitis.</p> | <p>Not applicable</p> | <p>1. HRQoL (including ability to carry out normal activities, study, work).</p> <p>2. Fatigue.</p> <p>3. Osteoporosis (treatment-related).</p> <p>4. Cataracts (treatment-related).</p> <p>5. Infections (treatment-related).</p> <p>6. Weight gain (treatment-related).</p> <p>7. Treatment related side-effects (unspecified).</p> <p>8. Brittle teeth</p> |

1  
2  
3  
4  
5  
6  
7  
8  
9  
10  
11  
12  
13  
14  
15  
16  
17  
18  
19  
20  
21  
22  
23  
24  
25  
26  
27  
28  
29  
30  
31  
32  
33  
34  
35  
36  
37  
38  
39  
40  
41  
42  
43  
44  
45  
46  
47  
48  
49  
50  
51  
52  
53  
54  
55  
56  
57  
58  
59  
60

|                                         |                                   |                      |                                                                                                                                                                                                                                                                                                                                                                                                                                                      |
|-----------------------------------------|-----------------------------------|----------------------|------------------------------------------------------------------------------------------------------------------------------------------------------------------------------------------------------------------------------------------------------------------------------------------------------------------------------------------------------------------------------------------------------------------------------------------------------|
|                                         |                                   |                      | <p>(treatment-related).</p> <p>9. More effective treatment unspecified.</p> <p>10. Complete recovery (unspecified).</p> <p>11. Mortality.</p> <p>12. Measure feeling well (unspecified)</p> <p>13. Fewer flare ups</p> <p>14. Less joint pain.</p> <p>15. Disability</p> <p>16. Liver damage requiring hospital admission</p> <p>17. Quicker recovery</p> <p>18. More monitoring of patients</p> <p>19. Symptom control.</p> <p>20. Side-effects</p> |
| <p>People with autoimmune hepatitis</p> | <p>Standardised protocol care</p> | <p>Standard care</p> | <p>1. HRQoL.</p> <p>2. Fatigue.</p> <p>3. Osteoporosis</p>                                                                                                                                                                                                                                                                                                                                                                                           |

|                                         |                                                                         |                       |                                                                                                                                                                                                                                                                                                          |
|-----------------------------------------|-------------------------------------------------------------------------|-----------------------|----------------------------------------------------------------------------------------------------------------------------------------------------------------------------------------------------------------------------------------------------------------------------------------------------------|
|                                         |                                                                         |                       | <p>(treatment-related).</p> <p>4. Cataracts</p> <p>(treatment-related).</p> <p>5. Infections</p> <p>(treatment-related).</p> <p>6. Weight gain</p> <p>(treatment-related).</p>                                                                                                                           |
| <p>People with autoimmune hepatitis</p> | <p>Treatment of fatigue/joint pain related to autoimmune hepatitis.</p> | <p>Not applicable</p> | <p>1. HRQoL.</p> <p>2. Fatigue.</p> <p>3. Osteoporosis</p> <p>(treatment-related).</p> <p>4. Cataracts</p> <p>(treatment-related).</p> <p>5. Infections</p> <p>(treatment-related).</p> <p>6. Weight gain</p> <p>(treatment-related).</p> <p>7. Joint pain.</p> <p>8. Symptoms</p> <p>(unspecified).</p> |
| <p>People with autoimmune hepatitis</p> | <p>Nurse-led care</p>                                                   | <p>Standard care</p>  | <p>1. Faster recovery.</p> <p>2. HRQoL.</p> <p>3. Symptoms.</p>                                                                                                                                                                                                                                          |

|                                                                                                                                                                                        |                                  |                                                    |               |                                                                                                                                                                                                                                                                                                                                     |
|----------------------------------------------------------------------------------------------------------------------------------------------------------------------------------------|----------------------------------|----------------------------------------------------|---------------|-------------------------------------------------------------------------------------------------------------------------------------------------------------------------------------------------------------------------------------------------------------------------------------------------------------------------------------|
| 1<br>2<br>3<br>4<br>5<br>6<br>7<br>8<br>9<br>10<br>11                                                                                                                                  | People with autoimmune hepatitis | Education of healthcare professionals and patients | Standard care | <ol style="list-style-type: none"> <li>1. Faster recovery.</li> <li>2. HRQoL.</li> <li>3. Symptoms.</li> </ol>                                                                                                                                                                                                                      |
| 12<br>13<br>14<br>15<br>16<br>17<br>18<br>19<br>20<br>21<br>22<br>23<br>24<br>25<br>26<br>27<br>28<br>29<br>30<br>31<br>32<br>33<br>34<br>35<br>36<br>37<br>38<br>39<br>40<br>41<br>42 | People with autoimmune hepatitis | Lifestyle: diet                                    | Standard care | <ol style="list-style-type: none"> <li>1. Treatment related adverse events.</li> <li>2. Requirements for liver transplantation.</li> <li>3. NHS (National Health Service, UK) costs</li> <li>4. HRQoL</li> <li>5. Mortality.</li> <li>6. Free from immunosuppressive therapies.</li> <li>7. Fatigue.</li> <li>8. Weight.</li> </ol> |
| 43<br>44<br>45<br>46<br>47<br>48<br>49<br>50<br>51<br>52                                                                                                                               | People with autoimmune hepatitis | Education of people                                | Standard care | <ol style="list-style-type: none"> <li>Faster reduction in strong medications.</li> <li>Need for liver transplantation.</li> </ol>                                                                                                                                                                                                  |
| 53<br>54<br>55<br>56<br>57<br>58<br>59<br>60                                                                                                                                           | People with autoimmune hepatitis | Cannabis + standard care                           | Standard care | <ol style="list-style-type: none"> <li>1. Reduction in immunosuppressants.</li> </ol>                                                                                                                                                                                                                                               |

|                                                                                                                                                                                             |                                                                                  |                        |                                                                                                                                                                                                                                                              |
|---------------------------------------------------------------------------------------------------------------------------------------------------------------------------------------------|----------------------------------------------------------------------------------|------------------------|--------------------------------------------------------------------------------------------------------------------------------------------------------------------------------------------------------------------------------------------------------------|
|                                                                                                                                                                                             |                                                                                  |                        | <p>2. Fatigue.</p> <p>3. Treatment related side effects such as serious infections, anxiety, depression, cancer, physical side effects.</p>                                                                                                                  |
| <p>General population (&gt; 40 years or &gt;50 years or middle-aged people, particularly overweight/obese and/or have type 2 diabetes and/or a family history of chronic liver disease)</p> | <p>Screening for liver disease by GP using routine blood tests/other methods</p> | <p>Standard care</p>   | <p>1. Earlier diagnosis and treatment.</p> <p>2. Preventing liver disease progressing to cirrhosis.</p> <p>3. More cost effective for NHS.</p> <p>4. Preventing the complications of chronic liver disease such as hepatocellular carcinoma and varices.</p> |
| <p>People with autoimmune hepatitis</p>                                                                                                                                                     | <p>Prednisolone</p>                                                              | <p>No intervention</p> | <p>1. Obesity.</p> <p>2. Osteoporosis.</p> <p>3. Insomnia.</p> <p>4. Hypertension.</p>                                                                                                                                                                       |

|                                                          |                                                                                       |                                                                 |                                                  |                                                |
|----------------------------------------------------------|---------------------------------------------------------------------------------------|-----------------------------------------------------------------|--------------------------------------------------|------------------------------------------------|
| 1<br>2<br>3<br>4<br>5<br>6<br>7<br>8<br>9                | People with genetic markers associated with autoimmune hepatitis.                     | Methods for prophylaxis                                         | No intervention                                  | Prevention of autoimmune hepatitis             |
| 10<br>11<br>12<br>13                                     | People with autoimmune hepatitis                                                      | Lifestyle: optimal physical exercise                            | Not applicable                                   | 1. Weight<br>2. Fatigue                        |
| 14<br>15<br>16<br>17<br>18                               | People with autoimmune hepatitis (stable)                                             | Nurse-led care                                                  | Standard care                                    | 1. Fatigue                                     |
| 19<br>20<br>21<br>22                                     | People with suspected autoimmune hepatitis                                            | Methods to make a quicker diagnosis                             | Not applicable                                   | 1. Earlier diagnosis                           |
| 23<br>24<br>25<br>26<br>27<br>28<br>29                   | People with NASH, diabetes, and gastroparesis                                         | Treatments for breathlessness and pain                          | Not applicable                                   | 1. Breathlessness and pain.                    |
| 30<br>31<br>32<br>33<br>34                               | People with NASH cirrhosis, diabetes, and anaemia                                     | Treatments                                                      | Not applicable                                   | HRQoL                                          |
| 35<br>36<br>37<br>38                                     | People with NASH cirrhosis, diabetes, and anaemia                                     | Education of people                                             | Standard care                                    | Better knowledge                               |
| 39<br>40<br>41                                           | General population                                                                    | Education of people                                             | Standard care                                    | Better knowledge                               |
| 42<br>43<br>44<br>45<br>46<br>47                         | People with NASH cirrhosis, diabetes, and anaemia                                     | Non-pharmacological treatments to decrease pain and depression  | Pharmacological interventions or no intervention | 1. Pain<br>2. Depression                       |
| 48<br>49<br>50<br>51<br>52<br>53<br>54<br>55<br>56<br>57 | People with suspected autoimmune diseases with potential to cause acute liver failure | Diagnosis of autoimmune diseases that cause acute liver failure | Not applicable                                   | Identification of specific autoimmune diseases |

|                                                                                                                                                                                                                                                                                                                                                             |                                                                             |                                                                       |                                                  |                                                                                                                                                                                                                                                                    |
|-------------------------------------------------------------------------------------------------------------------------------------------------------------------------------------------------------------------------------------------------------------------------------------------------------------------------------------------------------------|-----------------------------------------------------------------------------|-----------------------------------------------------------------------|--------------------------------------------------|--------------------------------------------------------------------------------------------------------------------------------------------------------------------------------------------------------------------------------------------------------------------|
| 1<br>2<br>3<br>4<br>5<br>6<br>7<br>8<br>9<br>10<br>11<br>12<br>13<br>14<br>15<br>16<br>17<br>18<br>19<br>20<br>21<br>22<br>23<br>24<br>25<br>26<br>27<br>28<br>29<br>30<br>31<br>32<br>33<br>34<br>35<br>36<br>37<br>38<br>39<br>40<br>41<br>42<br>43<br>44<br>45<br>46<br>47<br>48<br>49<br>50<br>51<br>52<br>53<br>54<br>55<br>56<br>57<br>58<br>59<br>60 | People with autoimmune diseases with potential to cause acute liver failure | Prophylactic treatments                                               | Not applicable                                   | Prevent acute liver failure                                                                                                                                                                                                                                        |
|                                                                                                                                                                                                                                                                                                                                                             | People with primary sclerosing cholangitis                                  | Lifestyle: diet (including alcohol consumption) and physical exercise | Not applicable                                   | <ol style="list-style-type: none"> <li>1. Reduction in symptoms</li> <li>2. Overall health benefits (unspecified)</li> <li>3. Ability to return to useful occupation.</li> <li>4. Reduce medication.</li> <li>5. Reduce need for annual investigations.</li> </ol> |
|                                                                                                                                                                                                                                                                                                                                                             | People with primary sclerosing cholangitis                                  | Azathioprine                                                          | Other interventions                              | Treatment related adverse events                                                                                                                                                                                                                                   |
|                                                                                                                                                                                                                                                                                                                                                             | People with autoimmune hepatitis                                            | Non-pharmacological treatments to treat autoimmune hepatitis          | Pharmacological interventions or no intervention | <ol style="list-style-type: none"> <li>1. Reduction in symptoms</li> <li>2. HRQoL (including the ability to do everyday tasks/ back into education or employment)</li> </ol>                                                                                       |

|                                                                                                                      |                                                                                  |                             |                                            |                                                                                                                                                                                                                                            |
|----------------------------------------------------------------------------------------------------------------------|----------------------------------------------------------------------------------|-----------------------------|--------------------------------------------|--------------------------------------------------------------------------------------------------------------------------------------------------------------------------------------------------------------------------------------------|
| 1<br>2<br>3<br>4<br>5<br>6<br>7<br>8<br>9                                                                            | People with primary sclerosing cholangitis                                       | Itching receptor blockers   | No intervention/<br>other<br>interventions | Reduction in itching                                                                                                                                                                                                                       |
| 10<br>11<br>12<br>13<br>14<br>15<br>16<br>17<br>18<br>19<br>20<br>21<br>22<br>23<br>24<br>25<br>26<br>27<br>28<br>29 | People with primary sclerosing cholangitis with and without Vitamin D deficiency | Vitamin D supplements       | Standard care                              | <ol style="list-style-type: none"> <li>1. Stop the progress of the disease.</li> <li>2. Fewer flare ups of inflammatory bowel disease and primary sclerosing cholangitis.</li> <li>3. Improve HRQoL</li> <li>4. Less depression</li> </ol> |
| 30<br>31<br>32<br>33<br>34<br>35<br>36                                                                               | People with primary sclerosing cholangitis and autoimmune hepatitis              | Ursodeoxycholic acid        | No intervention/<br>other<br>interventions | Reducing symptoms                                                                                                                                                                                                                          |
| 37<br>38<br>39<br>40<br>41<br>42<br>43                                                                               | People at risk of primary sclerosing cholangitis and autoimmune hepatitis        | Prophylactic treatments     | No intervention                            | Prevention of the condition                                                                                                                                                                                                                |
| 44<br>45<br>46<br>47                                                                                                 | People with autoimmune hepatitis                                                 | Non-steroidal interventions | Steroids                                   | Adverse events                                                                                                                                                                                                                             |
| 48<br>49<br>50<br>51<br>52<br>53<br>54<br>55<br>56<br>57<br>58<br>59<br>60                                           | People at risk of autoimmune liver diseases                                      | Prophylactic treatments     | Not applicable                             | Reduction in those getting advanced liver disorders                                                                                                                                                                                        |



|                                                                                                    |                                                            |                                            |                        |                                                                                                                                 |
|----------------------------------------------------------------------------------------------------|------------------------------------------------------------|--------------------------------------------|------------------------|---------------------------------------------------------------------------------------------------------------------------------|
| 1<br>2<br>3<br>4<br>5<br>6<br>7<br>8<br>9<br>10<br>11<br>12<br>13<br>14<br>15<br>16<br>17<br>18    | People with autoimmune liver diseases (20 to 30 years old) | Treatments                                 | Not applicable         | 1. Reduction in those getting advanced liver disorders.<br>2. Stabilisation of disorder.<br>3. Reduction in liver cancer rates. |
| 19<br>20<br>21<br>22<br>23<br>24<br>25                                                             | People with autoimmune liver diseases (> 30 years)         | Screening: Early diagnosis of liver cancer | No screening           | Early diagnosis of liver cancer                                                                                                 |
| 26<br>27<br>28<br>29<br>30<br>31<br>32<br>33<br>34                                                 | People with NASH and stroke                                | Nurse-led care                             | Standard care          | 1. Recovery time<br>2. Amount of recovery that is made                                                                          |
| 35<br>36<br>37<br>38                                                                               | People with haemochromatosis                               | Lifestyle: iron avoidance diet             | Traditional phlebotomy | Reduction in iron levels                                                                                                        |
| 39<br>40<br>41<br>42<br>43                                                                         | People with haemochromatosis                               | Acceleration of phlebotomy                 | Traditional phlebotomy | Reduction in iron levels                                                                                                        |
| 44<br>45<br>46<br>47<br>48<br>49<br>50<br>51<br>52<br>53<br>54<br>55<br>56<br>57<br>58<br>59<br>60 | People with NAFLD                                          | Nurse-led care                             | Standard care          | 1. Faster recovery.<br>2. Symptom relief (unspecified).<br>3. Prevention of more serious complications.<br>4. Patient education |

|                                                       |                                                   |                |                                                                                                                                                                                                                                    |
|-------------------------------------------------------|---------------------------------------------------|----------------|------------------------------------------------------------------------------------------------------------------------------------------------------------------------------------------------------------------------------------|
|                                                       |                                                   |                | <p>on diet and exercise to lose weight.</p> <p>5. Preventing progression into NASH and cirrhosis.</p> <p>6. Reducing symptoms of aching sides, leg weakness, sickness and nausea.</p> <p>7. Prevent heart attacks and strokes.</p> |
| People with NAFLD                                     | Treatments for pain                               | Not applicable | Reducing pain                                                                                                                                                                                                                      |
| People with NAFLD                                     | Treatments for itching                            | Not applicable | Reduction in itching                                                                                                                                                                                                               |
| People at risk of liver disease (overweight or obese) | Education of healthcare professionals about NAFLD | Standard care  | <p>1. Prevention of cirrhosis.</p> <p>2. Prevention of other related liver complications.</p> <p>3. Earlier diagnosis and treatment of liver diseases.</p> <p>4. Increased knowledge.</p>                                          |
| Midwives and healthcare professionals coming into     | Education of healthcare                           | Standard care  | 1. Prevention of cirrhosis.                                                                                                                                                                                                        |

|                                                                                                                                  |                                                          |                                    |                     |                                                                                                                                                                                               |
|----------------------------------------------------------------------------------------------------------------------------------|----------------------------------------------------------|------------------------------------|---------------------|-----------------------------------------------------------------------------------------------------------------------------------------------------------------------------------------------|
| 1<br>2<br>3<br>4<br>5<br>6<br>7<br>8<br>9                                                                                        | contact with children and young adults                   | professionals about liver disease  |                     | 2. Prevention of other related liver complications.                                                                                                                                           |
| 10<br>11<br>12<br>13<br>14<br>15<br>16<br>17<br>18<br>19<br>20<br>21<br>22<br>23<br>24<br>25<br>26<br>27<br>28<br>29<br>30<br>31 | People with chronic hepatitis C                          | Newer treatments                   | Older interventions | 1. Treatment-related complications<br>2. Ability to perform usual activities such as work, study, housework.<br>3. Severe liver damage requiring hospital admission.<br>4. Decreased anxiety. |
| 32<br>33<br>34<br>35<br>36                                                                                                       | New-borns                                                | Screening test for biliary atresia | No screening        | Earlier diagnosis and treatment                                                                                                                                                               |
| 37<br>38<br>39<br>40<br>41<br>42<br>43                                                                                           | Children who have undergone liver transplantation        | Immunosuppressive regimens         | Not applicable      | Adverse events                                                                                                                                                                                |
| 44<br>45<br>46<br>47                                                                                                             | People with liver-related disorders                      | Treatment for itching              | Not applicable      | Reduction or eradication of itching                                                                                                                                                           |
| 48<br>49<br>50<br>51<br>52                                                                                                       | People with primary biliary cholangitis                  | Education of people                | Standard care       | Knowledge                                                                                                                                                                                     |
| 53<br>54<br>55<br>56<br>57<br>58<br>59<br>60                                                                                     | People with positive AMA (antimitochondrial antibody) M2 | Prophylactic treatments            | Not applicable      | 1. Prevention of primary biliary cholangitis.                                                                                                                                                 |

|                             |                                  |               |                                                                                                                                                                    |
|-----------------------------|----------------------------------|---------------|--------------------------------------------------------------------------------------------------------------------------------------------------------------------|
|                             |                                  |               | 2. Reversion to a negative AMA M2 before cirrhosis develops.                                                                                                       |
| People with positive AMA M2 | Standardised protocol care by GP | Standard care | 1. Prevention of primary biliary cholangitis.<br>2. Reversion to a negative AMA M2 before cirrhosis develops.                                                      |
| People with liver disease   | Stem cell therapy                | Standard care | 1. Mortality<br>2. HRQoL (including ability to carry out normal activities including study and work)<br>3. Prolonging periods of remission<br>4. Reducing symptoms |
| People with liver disease   | Bio-artificial livers            | Standard care | 1. Mortality<br>2. HRQoL (including ability to carry out normal activities)                                                                                        |

|                                                                                |                                       |                                            |                                                                                                                 |
|--------------------------------------------------------------------------------|---------------------------------------|--------------------------------------------|-----------------------------------------------------------------------------------------------------------------|
|                                                                                |                                       |                                            | including study and work)                                                                                       |
| People with autoimmune hepatitis                                               | Targeted therapy against autoimmunity | Standard care                              | 1. Mortality<br>2. HRQoL (including ability to carry out normal activities including study and work)            |
| People with primary biliary cholangitis not responding to ursodeoxycholic acid | Different treatments                  | Not applicable                             | 1. Cure<br>2. Slowing of disease<br>3. Improved quality of life with respect to fatigue.                        |
| People with primary biliary cholangitis                                        | Antiviral treatment                   | No intervention/<br>other<br>interventions | 1. Improvement in health (unspecified)<br>2. Mortality                                                          |
| People with primary biliary cholangitis                                        | Treatment for itching and fatigue     | Not applicable                             | 1. HRQoL.<br>2. Anxiety.<br>3. Itching.<br>4. Fatigue.<br>5. Cure<br>6. Slowing of disease<br>7. Symptom relief |
| People with primary biliary cholangitis                                        | Greater patient involvement           | Standard care                              | 1. HRQoL.<br>2. Anxiety.                                                                                        |

|                                                                                  |                                                                               |                                                                                                                          |                                      |                                                                                  |
|----------------------------------------------------------------------------------|-------------------------------------------------------------------------------|--------------------------------------------------------------------------------------------------------------------------|--------------------------------------|----------------------------------------------------------------------------------|
| 1<br>2<br>3<br>4<br>5<br>6<br>7<br>8<br>9<br>10<br>11<br>12<br>13                | People with liver and gallbladder disorders                                   | Nurse-led care                                                                                                           | Standard care                        | 1. Symptoms.<br>2. Pain relief.<br>3. Quicker investigative measures.            |
| 14<br>15<br>16<br>17<br>18<br>19<br>20<br>21<br>22<br>23<br>24<br>25<br>26<br>27 | People with pain after cholecystectomy (especially elderly and living alone)  | Hospital based investigations to find the cause of pain, treatment of the cause of pain and discharged after pain relief | Symptomatic outpatient intervention  | Pain relief                                                                      |
| 28<br>29<br>30<br>31<br>32<br>33<br>34                                           | People with chronic hepatitis C                                               | Ribavirin                                                                                                                | No intervention/ other interventions | Osteoporosis                                                                     |
| 35<br>36<br>37<br>38<br>39<br>40                                                 | People with chronic hepatitis C taking ribavirin                              | Prophylactic treatments for osteoporosis                                                                                 | No prophylactic intervention         | Osteoporosis                                                                     |
| 41<br>42<br>43<br>44<br>45<br>46<br>47<br>48<br>49<br>50<br>51<br>52             | Healthcare professionals dealing with people with primary biliary cholangitis | Education of healthcare professionals about childhood liver disorders                                                    | Standard care                        | 1. Knowledge<br>2. Better treatment of patients with primary biliary cholangitis |
| 53<br>54<br>55<br>56<br>57<br>58<br>59<br>60                                     | People with liver disease                                                     | Education of people                                                                                                      | Standard care                        | 1. Patient knowledge.<br>2. Visits to the                                        |

|                                                        |                                                |                                            |                                                                                               |
|--------------------------------------------------------|------------------------------------------------|--------------------------------------------|-----------------------------------------------------------------------------------------------|
|                                                        |                                                |                                            | hospital.<br>3. More patient responsibility                                                   |
| People with symptomatic primary sclerosing cholangitis | Different treatments                           | Not applicable                             | 1. Cure of disease.<br>2. Delays progression of disease.                                      |
| People with primary sclerosing cholangitis             | Intervention to reverse liver damage           | Not applicable                             | 1. Mortality.<br>2. HRQoL.<br>3. Requirement for liver transplantation.                       |
| People with primary sclerosing cholangitis             | Intervention to treat fatigue                  | Not applicable                             | 1. HRQoL.<br>2. Fatigue.                                                                      |
| People with primary sclerosing cholangitis             | Intervention to treat itching                  | Not applicable                             | 1. HRQoL.<br>2. Itching.                                                                      |
| People with primary sclerosing cholangitis             | Specialist interest doctor                     | Standard care                              | 1. Mortality.<br>2. HRQoL.<br>3. Requirement for liver transplantation.<br>4. Symptom relief. |
| People at risk of oesophageal varices                  | Non-invasive assessment of oesophageal varices | Invasive assessment of oesophageal varices | Reduce bleeding oesophageal varices                                                           |

|                                                                                                                                                                            |                                                                                                  |                                                                                                                             |                 |                                                                                                                                                                                                                              |
|----------------------------------------------------------------------------------------------------------------------------------------------------------------------------|--------------------------------------------------------------------------------------------------|-----------------------------------------------------------------------------------------------------------------------------|-----------------|------------------------------------------------------------------------------------------------------------------------------------------------------------------------------------------------------------------------------|
| 1<br>2<br>3<br>4<br>5<br>6<br>7<br>8<br>9                                                                                                                                  | People at risk of chronic liver disease                                                          | Alternative to biopsy for assessment of cirrhosis                                                                           | Liver biopsy    | Assessment of whole liver                                                                                                                                                                                                    |
| 10<br>11<br>12<br>13<br>14<br>15<br>16<br>17<br>18<br>19<br>20                                                                                                             | People at risk of primary sclerosing cholangitis (PSC)                                           | Early diagnosis of primary sclerosing cholangitis<br>Alternate to liver biopsy                                              | Not applicable  | Not stated                                                                                                                                                                                                                   |
| 21<br>22<br>23<br>24<br>25<br>26<br>27<br>28<br>29<br>30<br>31<br>32<br>33<br>34<br>35<br>36<br>37<br>38<br>39<br>40<br>41<br>42<br>43<br>44<br>45<br>46<br>47<br>48<br>49 | People with primary sclerosing cholangitis with normal or relatively normal liver function tests | Alternative to UKELD (United Kingdom Model for End-Stage Liver Disease) scores for prioritisation for liver transplantation | UKELD           | 1. More accurate assessment of transplant need for transplant amongst PSC patients.<br>2. Reduction in numbers of 'low score' PSC patients becoming too ill for transplant, or not being offered a transplant once 'listed'. |
| 50<br>51<br>52<br>53<br>54<br>55<br>56<br>57<br>58<br>59<br>60                                                                                                             | People with positive AMA M2 with normal liver function tests                                     | Ursodeoxycholic acid                                                                                                        | No intervention | Slowing progression of primary biliary cholangitis                                                                                                                                                                           |



|                                                                                                                                                                                                                                                                                                                                                             |                                                       |                                                                     |                |                                                                                            |
|-------------------------------------------------------------------------------------------------------------------------------------------------------------------------------------------------------------------------------------------------------------------------------------------------------------------------------------------------------------|-------------------------------------------------------|---------------------------------------------------------------------|----------------|--------------------------------------------------------------------------------------------|
| 1<br>2<br>3<br>4<br>5<br>6<br>7<br>8<br>9<br>10<br>11<br>12<br>13<br>14<br>15<br>16<br>17<br>18<br>19<br>20<br>21<br>22<br>23<br>24<br>25<br>26<br>27<br>28<br>29<br>30<br>31<br>32<br>33<br>34<br>35<br>36<br>37<br>38<br>39<br>40<br>41<br>42<br>43<br>44<br>45<br>46<br>47<br>48<br>49<br>50<br>51<br>52<br>53<br>54<br>55<br>56<br>57<br>58<br>59<br>60 | People with suspected primary sclerosing cholangitis  | Nurse-led care                                                      | Standard care  | Earlier diagnosis and treatment                                                            |
|                                                                                                                                                                                                                                                                                                                                                             | People with liver failure of unknown reason           | Investigations to find the cause of liver failure of unknown origin | Not applicable | More knowledge.                                                                            |
|                                                                                                                                                                                                                                                                                                                                                             | People with Gilbert's syndrome                        | Treatment of fatigue related to Gilbert's syndrome                  | Not applicable | 1. HRQoL.<br>2. Chronic fatigue.<br>3. Depression                                          |
|                                                                                                                                                                                                                                                                                                                                                             | People with NAFLD (non-alcoholic fatty liver disease) | Breathing exercises                                                 | Standard care  | 1. Faster recovery.<br>2. Symptom relief<br>3. Prevention of more serious complications    |
|                                                                                                                                                                                                                                                                                                                                                             | People with NASH cirrhosis                            | Treatment of symptoms                                               | Not applicable | Improvement of symptoms                                                                    |
|                                                                                                                                                                                                                                                                                                                                                             | People at risk of liver disease                       | Screening for autoimmune diseases                                   | No screening   | Earlier diagnosis and treatment                                                            |
|                                                                                                                                                                                                                                                                                                                                                             | People with autoimmune hepatitis                      | Treatment of symptoms                                               | Not applicable | 1. Measure feeling well (unspecified).<br>2. Fatigue having energy.<br>3. Fewer flare ups. |

|                                  |                                                            |                                      |                                                                                                                                     |
|----------------------------------|------------------------------------------------------------|--------------------------------------|-------------------------------------------------------------------------------------------------------------------------------------|
|                                  |                                                            |                                      | 4. Less joint pain.<br>5. Disability.                                                                                               |
| People with autoimmune hepatitis | Methods to decrease stress                                 | Not applicable                       | 1. Measure feeling well (unspecified).<br>2. Fatigue having energy.<br>3. Fewer flare ups.<br>4. Less joint pain.<br>5. Disability. |
| People with liver disease        | Counselling for tremors and confusion                      | No counselling                       | Coping with symptoms                                                                                                                |
| People with NAFLD                | Staging of liver disease                                   | Not applicable                       | 1. Mortality.<br>2. Reversal of liver damage                                                                                        |
| People with NAFLD                | Metformin                                                  | No intervention                      | 1. Mortality.<br>2. Reversal of liver damage                                                                                        |
| People with NAFLD                | Standardised protocol for diagnosis and treatment of NAFLD | Standard care                        | 1. Mortality.<br>2. Reversal of liver damage                                                                                        |
| People with osteoarthritis       | Anti-inflammatory drugs                                    | Other interventions                  | Cirrhosis                                                                                                                           |
| People with diabetes             | Adequate control of diabetes                               | Lack of adequate control of diabetes | 1. NASH.<br>2. Cirrhosis.                                                                                                           |

|                                                                          |                                  |                                                                     |                |                                                                                              |
|--------------------------------------------------------------------------|----------------------------------|---------------------------------------------------------------------|----------------|----------------------------------------------------------------------------------------------|
| 1<br>2<br>3<br>4<br>5<br>6<br>7                                          | People at risk of NAFLD          | Screening: Early identification of causes                           | Standard care  | Prevention of liver disease                                                                  |
| 8<br>9<br>10<br>11<br>12<br>13<br>14<br>15<br>16<br>17<br>18<br>19<br>20 | People with NAFLD                | Treatments                                                          | Not applicable | 1. Cure<br>2. Prevention of liver disease<br>3. Disease progression<br>4. HRQoL              |
| 21<br>22<br>23<br>24<br>25<br>26<br>27<br>28<br>29<br>30<br>31<br>32     | People with upper abdominal pain | Screening: Early scan with ultrasound, blood tests, and urine tests | Standard care  | 1. Early identification of liver and gallbladder diseases<br>2. Appropriate advice/treatment |
| 33<br>34<br>35<br>36                                                     | People with NAFLD                | Lifestyle: diet and exercise                                        | Standard care  | 1. HRQoL                                                                                     |
| 37<br>38<br>39<br>40                                                     | People with NAFLD                | Specialist interest doctor                                          | Standard care  | 1. HRQoL                                                                                     |
| 41<br>42<br>43<br>44<br>45                                               | People at risk of liver disease  | Prophylactic interventions                                          | Not applicable | 1. Prevention of liver disease                                                               |
| 46<br>47<br>48<br>49<br>50<br>51<br>52                                   | People at risk of NAFLD          | Prophylactic treatments                                             | Not applicable | 1. Prevention of NAFLD<br>2. Decrease NAFLD                                                  |
| 53<br>54<br>55<br>56<br>57<br>58<br>59<br>60                             | People with NASH fibrosis        | Lifestyle: exercise                                                 | Standard care  | None stated                                                                                  |

|                                                                                                                                                                                                                                                                                                      |                                                                                                                                 |                       |                                                                                                                                                                                                                                                                             |
|------------------------------------------------------------------------------------------------------------------------------------------------------------------------------------------------------------------------------------------------------------------------------------------------------|---------------------------------------------------------------------------------------------------------------------------------|-----------------------|-----------------------------------------------------------------------------------------------------------------------------------------------------------------------------------------------------------------------------------------------------------------------------|
| <p>1<br/>2<br/>3<br/>4<br/>5<br/>6<br/>7<br/>8<br/>9<br/>10<br/>11<br/>12<br/>13<br/>14<br/>15<br/>16<br/>17<br/>18<br/>19<br/>20<br/>21<br/>22<br/>23<br/>24<br/>25<br/>26<br/>27<br/>28<br/>29<br/>30<br/>31<br/>32<br/>33<br/>34<br/>35<br/>36</p> <p>People with cryptogenic liver cirrhosis</p> | <p>Investigations to find the cause of cryptogenic cirrhosis</p>                                                                | <p>Not applicable</p> | <p>1. Reduction in liver disease diagnosis of the percentage regarded as cryptogenic.</p> <p>2. Establishment of relevant treatment pathways.</p> <p>3. Reduction in numbers of liver transplant required by earlier intervention using non-invasive treatment regimes.</p> |
| <p>37<br/>38<br/>39<br/>40<br/>41<br/>42<br/>43<br/>44<br/>45<br/>46<br/>47<br/>48<br/>49<br/>50<br/>51<br/>52<br/>53<br/>54<br/>55<br/>56<br/>57<br/>58<br/>59<br/>60</p> <p>People with cirrhosis</p>                                                                                              | <p>Community-led psychological support (on lifestyle: diet and exercise, stress, work-life balance, and general well-being)</p> | <p>Standard care</p>  | <p>1. Reduction of symptoms such as nausea, fatigue.</p> <p>2. Improved nutrition and healthier weights.</p> <p>3. Improved HRQoL</p> <p>4. Improved sense of wellbeing</p> <p>5. Successful work</p>                                                                       |

|                                  |                                        |               |                                                                                                                                                                      |
|----------------------------------|----------------------------------------|---------------|----------------------------------------------------------------------------------------------------------------------------------------------------------------------|
|                                  |                                        |               | <p>and job retention</p> <p>6. Good sense of self determination/empowerment and motivation</p> <p>7. Improved clinical markers (unspecified)</p>                     |
| Newborns                         | Screening for metabolic liver diseases | No screening  | <p>1. Early treatment for people with metabolic liver disease (including dietary advice)</p> <p>2. Mortality.</p> <p>3. HRQoL.</p> <p>4. Prevent type 2 diabetes</p> |
| People with autoimmune hepatitis | Telephone-based care                   | Standard care | <p>1. Reduction in time spent in outpatients</p> <p>2. Less spent on car-parking at hospitals</p>                                                                    |
| People with NASH and diabetes    | Liver transplantation                  | Standard care | <p>1. Mortality</p>                                                                                                                                                  |

|                                                                                                                                                                                                                                                                                                                                                             |                                                           |                                                     |               |                                                                                                |
|-------------------------------------------------------------------------------------------------------------------------------------------------------------------------------------------------------------------------------------------------------------------------------------------------------------------------------------------------------------|-----------------------------------------------------------|-----------------------------------------------------|---------------|------------------------------------------------------------------------------------------------|
| 1<br>2<br>3<br>4<br>5<br>6<br>7<br>8<br>9<br>10<br>11<br>12<br>13<br>14<br>15<br>16<br>17<br>18<br>19<br>20<br>21<br>22<br>23<br>24<br>25<br>26<br>27<br>28<br>29<br>30<br>31<br>32<br>33<br>34<br>35<br>36<br>37<br>38<br>39<br>40<br>41<br>42<br>43<br>44<br>45<br>46<br>47<br>48<br>49<br>50<br>51<br>52<br>53<br>54<br>55<br>56<br>57<br>58<br>59<br>60 | People with primary biliary cholangitis (newly diagnosed) | Adequate drinking water                             | Standard care | 1. HRQoL.<br>2. Liver function tests.                                                          |
|                                                                                                                                                                                                                                                                                                                                                             | People with primary sclerosing cholangitis                | Treatment targeted against deformation of bile duct | Standard care | 1. Time to end-stage liver disease.                                                            |
|                                                                                                                                                                                                                                                                                                                                                             | People with bile duct cancer                              | Treatment targeted against deformation of bile duct | Standard care | Not stated                                                                                     |
|                                                                                                                                                                                                                                                                                                                                                             | People with gallbladder sludge with digestive symptoms    | Avoiding surgery                                    | Standard care | 1. Symptom relief                                                                              |
|                                                                                                                                                                                                                                                                                                                                                             | People with NAFLD                                         | Education of healthcare professionals               | Standard care | 1. Greater awareness of conditions.<br>2. Preventative measures.<br>3. Greater knowledge base. |
|                                                                                                                                                                                                                                                                                                                                                             | People with NAFLD                                         | Education of general public                         | Standard care | 1. Greater awareness of conditions.<br>2. Preventative measures.<br>3. Greater knowledge base. |

|                                                                                                    |                                                                        |                                                                        |                       |                                                                                                                         |
|----------------------------------------------------------------------------------------------------|------------------------------------------------------------------------|------------------------------------------------------------------------|-----------------------|-------------------------------------------------------------------------------------------------------------------------|
| 1<br>2<br>3<br>4<br>5<br>6<br>7<br>8<br>9<br>10<br>11                                              | People with NAFLD                                                      | Methods to make an accurate diagnosis (including liver function tests) | Not applicable        | Not stated                                                                                                              |
| 12<br>13<br>14<br>15<br>16                                                                         | People with NAFLD (overweight)                                         | Interventions to lose weight                                           | Not applicable        | Weight loss                                                                                                             |
| 17<br>18<br>19<br>20                                                                               | People with liver disease (newly diagnosed)                            | Mental health support                                                  | Not applicable        | Mental health                                                                                                           |
| 21<br>22<br>23<br>24<br>25<br>26<br>27                                                             | Children with multiple autoimmune disorders related to liver           | Genetic testing of telomere lengths                                    | Other tests/ no tests | Not stated                                                                                                              |
| 28<br>29<br>30<br>31<br>32<br>33<br>34<br>35<br>36                                                 | Children with multiple autoimmune disorders related to liver           | Stem cell therapy                                                      | Standard care         | Reduction in all conditions with only one drug with little side effects                                                 |
| 37<br>38<br>39<br>40<br>41<br>42<br>43                                                             | People with primary biliary cholangitis (especially younger age group) | Treatments based on tools for predicting prognosis                     | Standard care         | Better care for people with high risk of progression                                                                    |
| 44<br>45<br>46<br>47<br>48<br>49<br>50<br>51<br>52<br>53<br>54<br>55<br>56<br>57<br>58<br>59<br>60 | People with chronic hepatitis C                                        | Lifestyle: diet                                                        | Standard care         | 1. Improvement in overall health.<br>2. Decrease in liver damage requiring hospital admission.<br>3. Patient knowledge. |

1  
2  
3  
4  
5  
6  
7  
8  
9  
10  
11  
12  
13  
14  
15  
16  
17  
18  
19  
20  
21  
22  
23  
24  
25  
26  
27  
28  
29  
30  
31  
32  
33  
34  
35  
36  
37  
38  
39  
40  
41  
42  
43  
44  
45  
46  
47  
48  
49  
50  
51  
52  
53  
54  
55  
56  
57  
58  
59  
60

|                                                                              |                                                           |                      |                                                                                                                                                                                                                                                                |
|------------------------------------------------------------------------------|-----------------------------------------------------------|----------------------|----------------------------------------------------------------------------------------------------------------------------------------------------------------------------------------------------------------------------------------------------------------|
|                                                                              |                                                           |                      | <p>4. Healthcare professional knowledge.</p> <p>5. Fewer treatment-related complications.</p> <p>6. Decreasing pain and discomfort.</p> <p>7. Clear guidelines for successful dietary needs.</p>                                                               |
| <p>Healthcare professionals dealing with people with chronic hepatitis C</p> | <p>Education of healthcare professionals (about diet)</p> | <p>Standard care</p> | <p>1. Improvement in overall health.</p> <p>2. Decrease in liver damage requiring hospital admission.</p> <p>3. Patient knowledge.</p> <p>4. Healthcare professional knowledge.</p> <p>5. Fewer treatment-related complications.</p> <p>6. Decreasing pain</p> |



|                                                           |                                                                                                                     |               |                                                                                                                                                                                                                                                 |
|-----------------------------------------------------------|---------------------------------------------------------------------------------------------------------------------|---------------|-------------------------------------------------------------------------------------------------------------------------------------------------------------------------------------------------------------------------------------------------|
|                                                           |                                                                                                                     |               | and discomfort.<br>7. Clear guidelines for successful dietary needs.                                                                                                                                                                            |
| Healthcare professionals dealing with people with NAFLD   | Education of healthcare professionals (around support to patients on weight control, diet, exercise and life style) | Standard care | <ol style="list-style-type: none"> <li>1. Preventing progression into NASH and cirrhosis.</li> <li>2. Reducing symptoms of aching sides, leg weakness, sickness and nausea.</li> <li>3. Prevent heart attacks and strokes.</li> </ol>           |
| Family members of people with primary biliary cholangitis | Screening of family members for primary biliary cholangitis                                                         | No screening  | <ol style="list-style-type: none"> <li>1. Establishing the genetic link for primary biliary cholangitis.</li> <li>2. Earlier identification of primary biliary cholangitis who may have PBC or be at risk.</li> <li>3. Cost-savings.</li> </ol> |

|                                                                                                                      |                                                                    |                                                                                                                                                                     |                |                                                                                                                                                                            |
|----------------------------------------------------------------------------------------------------------------------|--------------------------------------------------------------------|---------------------------------------------------------------------------------------------------------------------------------------------------------------------|----------------|----------------------------------------------------------------------------------------------------------------------------------------------------------------------------|
| 1<br>2<br>3<br>4<br>5<br>6<br>7<br>8<br>9                                                                            | People with positive AMA<br>M2 with normal liver<br>function tests | Screening for cirrhosis<br>using biopsy                                                                                                                             | No screening   | Accurate diagnosis of<br>primary biliary<br>cholangitis.                                                                                                                   |
| 10<br>11<br>12<br>13<br>14<br>15<br>16<br>17<br>18<br>19<br>20<br>21<br>22<br>23<br>24<br>25<br>26<br>27             | People with primary biliary<br>cholangitis                         | Screening for other<br>autoimmune<br>conditions associated<br>with primary biliary<br>cholangitis and<br>complications related<br>to primary biliary<br>cholangitis | No screening   | 1. HRQoL.<br>2. Costs.                                                                                                                                                     |
| 28<br>29<br>30<br>31                                                                                                 | People with autoimmune<br>liver disease                            | Treatment of fatigue<br>and others symptoms                                                                                                                         | Not applicable | Remission                                                                                                                                                                  |
| 32<br>33<br>34<br>35<br>36<br>37<br>38<br>39<br>40                                                                   | People with primary<br>sclerosing cholangitis                      | Standardised protocol<br>for follow-up of<br>patients with primary<br>sclerosing cholangitis                                                                        | Standard care  | 1. Reduce need for<br>annual<br>investigations.<br>2. Costs.                                                                                                               |
| 41<br>42<br>43<br>44<br>45<br>46<br>47<br>48<br>49<br>50<br>51<br>52<br>53<br>54<br>55<br>56<br>57<br>58<br>59<br>60 | People with other<br>autoimmune disease                            | Screening for liver<br>disease                                                                                                                                      | No screening   | 1. Decreasing risk of<br>severe liver damage<br>and admission to<br>hospital<br>2. Reducing the need<br>for liver transplants<br>3. Decreasing the risk<br>of liver cancer |

|                                         |                                                          |                                                                                                       |                                                                                                           |
|-----------------------------------------|----------------------------------------------------------|-------------------------------------------------------------------------------------------------------|-----------------------------------------------------------------------------------------------------------|
|                                         |                                                          |                                                                                                       | 4. Mortality<br>5. HRQoL                                                                                  |
| People with NAFLD                       | Pathway for managing end of life care                    | Standard care                                                                                         | 1. Patient and carer satisfaction<br>2. Patient HRQoL<br>3. Symptom relief.                               |
| People with decompensated liver disease | Lifestyle: nutritional treatment                         | Not applicable                                                                                        | 1. Improved survival.<br>2. Reduced symptoms.<br>3. Improved nutritional status.<br>4. Improved Strength. |
| People with decompensated liver disease | Measuring energy requirements with indirect calorimeters | Current UK guidance on requirements (Parenteral & Enteral Nutrition Group) (high energy requirements) | 1. Improved survival.<br>2. Reduced symptoms.<br>3. Improved nutritional status.<br>4. Improved Strength. |
| People with hepatic encephalopathy      | Branch chain amino acids                                 | Standard care                                                                                         | 1. Improved survival.<br>2. Reduced symptoms.<br>3. Improved                                              |

|                                                             |                                                                                                 |                             |                                                                                                           |
|-------------------------------------------------------------|-------------------------------------------------------------------------------------------------|-----------------------------|-----------------------------------------------------------------------------------------------------------|
|                                                             |                                                                                                 |                             | nutritional status.<br>4. Improved Strength.                                                              |
| People with decompensated liver disease with muscle wasting | Branch chain amino acids                                                                        | Standard care               | 1. Improved survival.<br>2. Reduced symptoms.<br>3. Improved nutritional status.<br>4. Improved Strength. |
| People with decompensated liver disease with muscle wasting | Lifestyle: exercise                                                                             | Standard care               | 1. Improved survival.<br>2. Reduced symptoms.<br>3. Improved nutritional status.<br>4. Improved Strength. |
| People with decompensated liver disease                     | Standardised nutritional assessment of patients and outcomes in nutritional intervention trials | Non-standardised assessment | 1. Improved survival.<br>2. Reduced symptoms.<br>3. Improved nutritional status.<br>4. Improved Strength. |

|                                                             |                                                                                                           |                                      |                                                                                                                          |
|-------------------------------------------------------------|-----------------------------------------------------------------------------------------------------------|--------------------------------------|--------------------------------------------------------------------------------------------------------------------------|
|                                                             |                                                                                                           |                                      | 5. Better conduct of future trials.                                                                                      |
| People with NAFLD                                           | Methods to increase self care                                                                             | Not applicable                       | Reducing symptoms                                                                                                        |
| People with NAFLD                                           | Methods to decrease shortness of breath                                                                   | Not applicable                       | Reducing symptoms                                                                                                        |
| People with liver disease                                   | Interventions to decrease fatigue                                                                         | Not applicable                       | Fatigue                                                                                                                  |
| Healthcare professionals dealing with people with cirrhosis | Education of healthcare professionals about cirrhosis (complications and benefits and harms of treatment) | Standard care                        | Better advice to patients by health professionals regarding complications and benefits and harms of different treatments |
| People with primary biliary cholangitis                     | Ursodeoxycholic acid (including optimal dose)                                                             | No intervention/ other interventions | 1. Liver function tests.<br>2. Minimal effective dose of ursodeoxycholic acid.<br>3. Good sleep.                         |
| People with liver cancer and ascites                        | Different interventions                                                                                   | Not applicable                       | HRQoL                                                                                                                    |

|                                                                                        |                                                |                                    |                         |                                                                                 |
|----------------------------------------------------------------------------------------|------------------------------------------------|------------------------------------|-------------------------|---------------------------------------------------------------------------------|
| 1<br>2<br>3<br>4<br>5<br>6<br>7<br>8<br>9<br>10<br>11                                  | People with primary sclerosing cholangitis     | Screening for cancer               | No screening            | 1. Benefits<br>2. Earlier diagnosis of bile duct cancer<br>3. Mortality         |
| 12<br>13<br>14<br>15<br>16<br>17<br>18                                                 | People with primary or metastatic liver cancer | Nurse-led care (follow-up clinic)  | Doctor-led follow-up    | 1. Patient satisfaction<br>2. Timely surveillance                               |
| 19<br>20<br>21<br>22                                                                   | People with cirrhosis                          | Life-style: nutritional advice     | Not applicable          | 1. Fatigue<br>2. Muscle wasting                                                 |
| 23<br>24<br>25<br>26<br>27                                                             | People with polycystic liver disease           | Surgery                            | Non-surgical management | 1. Recurrence<br>2. HRQoL                                                       |
| 28<br>29<br>30<br>31<br>32<br>33<br>34                                                 | People with gallstones                         | Avoiding surgery                   | Surgery                 | 1. Requirement for surgery<br>2. Costs to NHS                                   |
| 35<br>36<br>37<br>38<br>39<br>40<br>41<br>42<br>43<br>44<br>45                         | People at risk of NASH                         | Nurse-led care                     | No intervention         | 1. Early diagnosis of NASH.<br>2. Successful treatment of NASH.<br>3. Mortality |
| 46<br>47<br>48<br>49<br>50<br>51<br>52<br>53<br>54<br>55<br>56<br>57<br>58<br>59<br>60 | People at risk of NASH                         | Screening for NASH using Fibroscan | No intervention         | 1. Early diagnosis of NASH.<br>2. Successful treatment of NASH.<br>3. Mortality |

|                                                                                                                                                                                                    |                                                            |                        |                                                                                                                                                                             |
|----------------------------------------------------------------------------------------------------------------------------------------------------------------------------------------------------|------------------------------------------------------------|------------------------|-----------------------------------------------------------------------------------------------------------------------------------------------------------------------------|
| <p>1<br/>2<br/>3<br/>4<br/>5<br/>6<br/>7<br/>8<br/>9<br/>10<br/>11<br/>12<br/>13<br/>14</p> <p>People at risk of NASH</p>                                                                          | <p>Support group<br/>focussed on diet and<br/>exercise</p> | <p>No intervention</p> | <p>1. Prevention of<br/>NASH.<br/>2. Successful<br/>treatment of NASH.<br/>3. Mortality</p>                                                                                 |
| <p>15<br/>16<br/>17<br/>18</p> <p>People at risk of NASH</p>                                                                                                                                       | <p>Emotional support<br/>group for carers</p>              | <p>No intervention</p> | <p>HRQoL</p>                                                                                                                                                                |
| <p>19<br/>20<br/>21<br/>22<br/>23<br/>24<br/>25<br/>26<br/>27<br/>28<br/>29<br/>30<br/>31<br/>32<br/>33<br/>34<br/>35<br/>36</p> <p>People with NASH</p>                                           | <p>Nurse-led care</p>                                      | <p>Standard care</p>   | <p>1. Mortality.<br/>2. HRQoL.<br/>3. Requirement for<br/>liver transplantation.<br/>4. Liver cancer.<br/>5. Liver failure.<br/>6. Treatment-related<br/>complications.</p> |
| <p>37<br/>38<br/>39<br/>40<br/>41<br/>42<br/>43<br/>44<br/>45<br/>46<br/>47<br/>48<br/>49<br/>50<br/>51<br/>52<br/>53<br/>54<br/>55<br/>56<br/>57<br/>58<br/>59<br/>60</p> <p>People with NASH</p> | <p>Lifestyle: diet</p>                                     | <p>Standard care</p>   | <p>1. Mortality.<br/>2. HRQoL.<br/>3. Requirement for<br/>liver transplantation.<br/>4. Liver cancer.<br/>5. Liver failure.<br/>6. Treatment-related<br/>complications.</p> |

|                                                                                                                                                                            |                         |                                                                   |                          |                                                                                                                                                                                                                     |
|----------------------------------------------------------------------------------------------------------------------------------------------------------------------------|-------------------------|-------------------------------------------------------------------|--------------------------|---------------------------------------------------------------------------------------------------------------------------------------------------------------------------------------------------------------------|
| 1<br>2<br>3<br>4<br>5<br>6<br>7<br>8<br>9                                                                                                                                  | People with NASH        | Different interventions to decrease anxiety and depression        | Standard care            | Anxiety and depression                                                                                                                                                                                              |
| 10<br>11<br>12<br>13                                                                                                                                                       | People with NASH        | Research design using support group                               | Standard research design | Help towards better research                                                                                                                                                                                        |
| 14<br>15<br>16<br>17<br>18                                                                                                                                                 | General population      | Life style: diet and exercise                                     | No intervention          | HRQoL                                                                                                                                                                                                               |
| 19<br>20<br>21<br>22<br>23<br>24<br>25                                                                                                                                     | General population      | Education of people (patient information leaflet at GP surgeries) | No intervention          | 1. Prevention of NASH.<br>2. HRQoL.                                                                                                                                                                                 |
| 26<br>27<br>28<br>29<br>30<br>31<br>32<br>33<br>34<br>35<br>36<br>37<br>38<br>39<br>40<br>41<br>42<br>43<br>44<br>45<br>46<br>47<br>48<br>49<br>50<br>51<br>52<br>53<br>54 | General population      | Screening: for liver disease                                      | No intervention          | 1. Early diagnosis of liver disease<br>2. Mortality<br>3. HRQoL<br>4. Requirement for liver transplantation<br>5. Costs<br>6. Requirement for hospital admission for severe liver damage<br>7. Primary liver cancer |
| 55<br>56<br>57<br>58<br>59<br>60                                                                                                                                           | Primary school children | Lifestyle: nutritional and dietary advice                         | No intervention          | 1. Adherence to healthy diet and                                                                                                                                                                                    |



|                                                     |                                                            |                |                                                 |
|-----------------------------------------------------|------------------------------------------------------------|----------------|-------------------------------------------------|
|                                                     |                                                            |                | exercise to sustain healthy life style.         |
| People undergoing liver resection                   | Best method to assess function and volume of remnant liver | Not applicable | 1. Mortality.<br>2. HRQoL.<br>3. Complications. |
| People undergoing liver resection                   | Best method to assess cardiopulmonary function?            | Not applicable | 1. Mortality.<br>2. HRQoL.<br>3. Complications. |
| People undergoing liver resection                   | Pre-operative education                                    | Standard care  | 1. Mortality.<br>2. HRQoL.<br>3. Complications. |
| Surgeons treating people undergoing liver resection | Simulation and training of surgeons                        | Standard care  | 1. Mortality.<br>2. HRQoL.<br>3. Complications. |
| People undergoing liver resection                   | Growth factors to optimise muscle and fat content          | Standard care  | 1. Mortality.<br>2. HRQoL.<br>3. Complications. |
| People undergoing liver resection                   | Pharmacological interventions for weight loss              | Not applicable | 1. Mortality.<br>2. HRQoL.<br>3. Complications. |
| People undergoing liver resection                   | Portal vein embolisation                                   | Standard care  | 1. Mortality.<br>2. HRQoL.<br>3. Complications. |

|                                                                                                                                                                                                                                                                                                                                                             |                                                     |                                                                                        |                              |                                                 |
|-------------------------------------------------------------------------------------------------------------------------------------------------------------------------------------------------------------------------------------------------------------------------------------------------------------------------------------------------------------|-----------------------------------------------------|----------------------------------------------------------------------------------------|------------------------------|-------------------------------------------------|
| 1<br>2<br>3<br>4<br>5<br>6<br>7<br>8<br>9<br>10<br>11<br>12<br>13<br>14<br>15<br>16<br>17<br>18<br>19<br>20<br>21<br>22<br>23<br>24<br>25<br>26<br>27<br>28<br>29<br>30<br>31<br>32<br>33<br>34<br>35<br>36<br>37<br>38<br>39<br>40<br>41<br>42<br>43<br>44<br>45<br>46<br>47<br>48<br>49<br>50<br>51<br>52<br>53<br>54<br>55<br>56<br>57<br>58<br>59<br>60 | People undergoing liver resection                   | Reducing systemic inflammation using steroids                                          | Standard care                | 1. Mortality.<br>2. HRQoL.<br>3. Complications. |
|                                                                                                                                                                                                                                                                                                                                                             | People undergoing liver resection                   | Open liver resection                                                                   | Laparoscopic liver resection | 1. Mortality.<br>2. HRQoL.<br>3. Complications. |
|                                                                                                                                                                                                                                                                                                                                                             | People undergoing liver resection                   | Tumour visualisation and localisation of the tumour                                    | Standard care                | 1. Mortality.<br>2. HRQoL.<br>3. Complications. |
|                                                                                                                                                                                                                                                                                                                                                             | People undergoing liver resection                   | Goal directed therapy during operation                                                 | Standard care                | 1. Mortality.<br>2. HRQoL.<br>3. Complications. |
|                                                                                                                                                                                                                                                                                                                                                             | Surgeons treating people undergoing liver resection | Use of magnifying surgical loupes during liver surgery                                 | Standard care                | 1. Mortality.<br>2. HRQoL.<br>3. Complications. |
|                                                                                                                                                                                                                                                                                                                                                             | People undergoing liver resection                   | Portal vein pressure decrease (by the use of drugs such as vasopressin) during surgery | Standard care                | 1. Mortality.<br>2. HRQoL.<br>3. Complications. |
|                                                                                                                                                                                                                                                                                                                                                             | People undergoing liver resection                   | Transection techniques                                                                 | Not applicable               | 1. Mortality.<br>2. HRQoL.<br>3. Complications. |

|                                                                                                                                                                                                                                                                                                                                                             |                                                                                               |                               |                                                 |                                                 |
|-------------------------------------------------------------------------------------------------------------------------------------------------------------------------------------------------------------------------------------------------------------------------------------------------------------------------------------------------------------|-----------------------------------------------------------------------------------------------|-------------------------------|-------------------------------------------------|-------------------------------------------------|
| 1<br>2<br>3<br>4<br>5<br>6<br>7<br>8<br>9<br>10<br>11<br>12<br>13<br>14<br>15<br>16<br>17<br>18<br>19<br>20<br>21<br>22<br>23<br>24<br>25<br>26<br>27<br>28<br>29<br>30<br>31<br>32<br>33<br>34<br>35<br>36<br>37<br>38<br>39<br>40<br>41<br>42<br>43<br>44<br>45<br>46<br>47<br>48<br>49<br>50<br>51<br>52<br>53<br>54<br>55<br>56<br>57<br>58<br>59<br>60 | People undergoing liver resection                                                             | Vascular occlusion techniques | Not applicable                                  | 1. Mortality.<br>2. HRQoL.<br>3. Complications. |
| People undergoing liver resection                                                                                                                                                                                                                                                                                                                           | Cardiopulmonary and pharmacological interventions for decreasing blood loss                   | Not applicable                | 1. Mortality.<br>2. HRQoL.<br>3. Complications. |                                                 |
| People undergoing liver resection                                                                                                                                                                                                                                                                                                                           | Use of peritoneal drains                                                                      | No drain                      | 1. Mortality.<br>2. HRQoL.<br>3. Complications. |                                                 |
| People undergoing liver resection                                                                                                                                                                                                                                                                                                                           | ALPPS procedure (Associating Liver Partition and Portal vein Ligation for Staged hepatectomy) | Standard care                 | 1. Mortality.<br>2. HRQoL.<br>3. Complications. |                                                 |
| People undergoing liver resection                                                                                                                                                                                                                                                                                                                           | Goal directed therapy (post-operative)                                                        | Standard care                 | 1. Mortality.<br>2. HRQoL.<br>3. Complications. |                                                 |
| People undergoing liver resection                                                                                                                                                                                                                                                                                                                           | Pain control protocol                                                                         | Standard care                 | 1. Mortality.<br>2. HRQoL.<br>3. Complications. |                                                 |
| People undergoing liver resection                                                                                                                                                                                                                                                                                                                           | Early mobilisation protocol                                                                   | Standard care                 | 1. Mortality.<br>2. HRQoL.<br>3. Complications. |                                                 |

|                                                                                                                                                                                                                                                                                                                                                             |                                                   |                                                                                          |                                     |                                                 |
|-------------------------------------------------------------------------------------------------------------------------------------------------------------------------------------------------------------------------------------------------------------------------------------------------------------------------------------------------------------|---------------------------------------------------|------------------------------------------------------------------------------------------|-------------------------------------|-------------------------------------------------|
| 1<br>2<br>3<br>4<br>5<br>6<br>7<br>8<br>9<br>10<br>11<br>12<br>13<br>14<br>15<br>16<br>17<br>18<br>19<br>20<br>21<br>22<br>23<br>24<br>25<br>26<br>27<br>28<br>29<br>30<br>31<br>32<br>33<br>34<br>35<br>36<br>37<br>38<br>39<br>40<br>41<br>42<br>43<br>44<br>45<br>46<br>47<br>48<br>49<br>50<br>51<br>52<br>53<br>54<br>55<br>56<br>57<br>58<br>59<br>60 | People undergoing liver resection                 | Early oral intake protocol                                                               | Standard care                       | 1. Mortality.<br>2. HRQoL.<br>3. Complications. |
|                                                                                                                                                                                                                                                                                                                                                             | People undergoing liver resection                 | Portal vein pressure decrease (by the use of drugs such as vasopressin) post-operatively | Standard care                       | 1. Mortality.<br>2. HRQoL.<br>3. Complications. |
|                                                                                                                                                                                                                                                                                                                                                             | People with unresectable hepatocellular carcinoma | Radioembolisation                                                                        | No intervention/other interventions | 1. Mortality.<br>2. HRQoL.<br>3. Complications. |
|                                                                                                                                                                                                                                                                                                                                                             | People with unresectable hepatocellular carcinoma | External beam radiotherapy                                                               | No intervention/other interventions | 1. Mortality.<br>2. HRQoL.<br>3. Complications. |
|                                                                                                                                                                                                                                                                                                                                                             | People with chronic hepatitis B                   | Screening for cancer                                                                     | No screening                        | 1. Mortality.<br>2. HRQoL.<br>3. Complications. |
|                                                                                                                                                                                                                                                                                                                                                             | People with hepatocellular carcinoma              | Cryotherapy                                                                              | No intervention/other interventions | 1. Mortality.<br>2. HRQoL.<br>3. Complications. |
|                                                                                                                                                                                                                                                                                                                                                             | People with hepatocellular carcinoma              | Systemic chemotherapy                                                                    | No intervention/other interventions | 1. Mortality.<br>2. HRQoL.<br>3. Complications. |

|                                                                                                                                                                                                                                                                                                                                                             |                                                                |                                  |                                     |                                                 |
|-------------------------------------------------------------------------------------------------------------------------------------------------------------------------------------------------------------------------------------------------------------------------------------------------------------------------------------------------------------|----------------------------------------------------------------|----------------------------------|-------------------------------------|-------------------------------------------------|
| 1<br>2<br>3<br>4<br>5<br>6<br>7<br>8<br>9<br>10<br>11<br>12<br>13<br>14<br>15<br>16<br>17<br>18<br>19<br>20<br>21<br>22<br>23<br>24<br>25<br>26<br>27<br>28<br>29<br>30<br>31<br>32<br>33<br>34<br>35<br>36<br>37<br>38<br>39<br>40<br>41<br>42<br>43<br>44<br>45<br>46<br>47<br>48<br>49<br>50<br>51<br>52<br>53<br>54<br>55<br>56<br>57<br>58<br>59<br>60 | People with early or very early hepatocellular carcinoma       | Treatment                        | Not applicable                      | 1. Mortality.<br>2. HRQoL.<br>3. Complications. |
|                                                                                                                                                                                                                                                                                                                                                             | People with intermediate hepatocellular carcinoma              | Treatment                        | Not applicable                      | 1. Mortality.<br>2. HRQoL.<br>3. Complications. |
|                                                                                                                                                                                                                                                                                                                                                             | People with hepatocellular carcinoma                           | Tamoxifen                        | No intervention/other interventions | 1. Mortality.<br>2. HRQoL.<br>3. Complications. |
|                                                                                                                                                                                                                                                                                                                                                             | People with unresectable hepatocellular carcinoma              | Transarterial embolisation       | No intervention/other interventions | 1. Mortality.<br>2. HRQoL.<br>3. Complications. |
|                                                                                                                                                                                                                                                                                                                                                             | People with unresectable hepatocellular carcinoma              | Tyrosine kinase inhibitors       | No intervention/other interventions | 1. Mortality.<br>2. HRQoL.<br>3. Complications. |
|                                                                                                                                                                                                                                                                                                                                                             | People undergoing liver resection for hepatocellular carcinoma | Neoadjuvant and adjuvant therapy | No intervention/other interventions | 1. Mortality.<br>2. HRQoL.<br>3. Complications. |
|                                                                                                                                                                                                                                                                                                                                                             | People with unresectable hepatocellular carcinoma              | Transarterial chemoembolisation  | No intervention/other interventions | 1. Mortality.<br>2. HRQoL.<br>3. Complications. |
|                                                                                                                                                                                                                                                                                                                                                             | People with hepatocellular carcinoma                           | Interferon                       | No intervention/other interventions | 1. Mortality.<br>2. HRQoL.<br>3. Complications. |

|                                                                                                                                                                                                                                                                                                                                                             |                                                              |                                     |                                                 |                                                 |
|-------------------------------------------------------------------------------------------------------------------------------------------------------------------------------------------------------------------------------------------------------------------------------------------------------------------------------------------------------------|--------------------------------------------------------------|-------------------------------------|-------------------------------------------------|-------------------------------------------------|
| 1<br>2<br>3<br>4<br>5<br>6<br>7<br>8<br>9<br>10<br>11<br>12<br>13<br>14<br>15<br>16<br>17<br>18<br>19<br>20<br>21<br>22<br>23<br>24<br>25<br>26<br>27<br>28<br>29<br>30<br>31<br>32<br>33<br>34<br>35<br>36<br>37<br>38<br>39<br>40<br>41<br>42<br>43<br>44<br>45<br>46<br>47<br>48<br>49<br>50<br>51<br>52<br>53<br>54<br>55<br>56<br>57<br>58<br>59<br>60 | People with hepatocellular carcinoma                         | Surgical resection                  | Liver transplantation                           | 1. Mortality.<br>2. HRQoL.<br>3. Complications. |
| People undergoing liver resection for hepatocellular carcinoma                                                                                                                                                                                                                                                                                              | Anterior approach                                            | Conventional liver resection        | 1. Mortality.<br>2. HRQoL.<br>3. Complications. |                                                 |
| People with hepatocellular carcinoma                                                                                                                                                                                                                                                                                                                        | Radiofrequency ablation                                      | No intervention/other interventions | 1. Mortality.<br>2. HRQoL.<br>3. Complications. |                                                 |
| People undergoing liver resection for hepatocellular carcinoma                                                                                                                                                                                                                                                                                              | Post-operative transarterial chemoembolisation               | No intervention/other interventions | 1. Mortality.<br>2. HRQoL.<br>3. Complications. |                                                 |
| People undergoing liver resection for hepatocellular carcinoma                                                                                                                                                                                                                                                                                              | Post-operative lamivudine with or without adefovir dipivoxil | No intervention/other interventions | 1. Mortality.<br>2. HRQoL.<br>3. Complications. |                                                 |
| People with advanced biliary tract carcinoma                                                                                                                                                                                                                                                                                                                | gemcitabine-based chemotherapy                               | No intervention/other interventions | 1. Mortality.<br>2. HRQoL.<br>3. Complications. |                                                 |
| People with unresectable cholangiocarcinoma                                                                                                                                                                                                                                                                                                                 | Endoscopic treatment                                         | Surgery                             | 1. Mortality.<br>2. HRQoL.<br>3. Complications. |                                                 |
| People undergoing liver transplantation                                                                                                                                                                                                                                                                                                                     | Pharmacological interventions for                            | No intervention/other interventions | 1. Mortality.<br>2. HRQoL.<br>3. Complications. |                                                 |

|                                                                   |                                                         |                                     |                                                 |
|-------------------------------------------------------------------|---------------------------------------------------------|-------------------------------------|-------------------------------------------------|
|                                                                   | reducing ischaemia<br>reperfusion injury                |                                     |                                                 |
| People undergoing liver transplantation for hepatitis B infection | Antibiotic prophylaxis                                  | No intervention/other interventions | 1. Mortality.<br>2. HRQoL.<br>3. Complications. |
| People undergoing liver transplantation for hepatitis B infection | Hepatitis B immune globulin                             | No intervention/other interventions | 1. Mortality.<br>2. HRQoL.<br>3. Complications. |
| People undergoing liver transplantation                           | Prostaglandins                                          | No intervention/other interventions | 1. Mortality.<br>2. HRQoL.<br>3. Complications. |
| People undergoing haemopoietic stem cell transplantation          | Interventions to prevent hepatic veno-occlusive disease | Not applicable                      | 1. Mortality.<br>2. HRQoL.<br>3. Complications. |
| People undergoing haemopoietic stem cell transplantation          | Interventions to treat hepatic veno-occlusive disease   | Not applicable                      | 1. Mortality.<br>2. HRQoL.<br>3. Complications. |
| People undergoing liver transplantation                           | Immunosuppressive regimens                              | Not applicable                      | 1. Mortality.<br>2. HRQoL.<br>3. Complications. |
| People undergoing liver transplantation                           | Venovenous bypass                                       | No intervention                     | 1. Mortality.<br>2. HRQoL.<br>3. Complications. |

|                                                                            |                                         |                                                                                            |                                    |                                                 |
|----------------------------------------------------------------------------|-----------------------------------------|--------------------------------------------------------------------------------------------|------------------------------------|-------------------------------------------------|
| 1<br>2<br>3<br>4<br>5<br>6<br>7<br>8<br>9                                  | People undergoing liver transplantation | Ischaemic preconditioning                                                                  | No intervention                    | 1. Mortality.<br>2. HRQoL.<br>3. Complications. |
| 10<br>11<br>12<br>13<br>14<br>15<br>16                                     | People undergoing liver transplantation | Methods of biliary reconstruction                                                          | Not applicable                     | 1. Mortality.<br>2. HRQoL.<br>3. Complications. |
| 17<br>18<br>19<br>20<br>21<br>22<br>23<br>24<br>25<br>26<br>27             | People undergoing liver transplantation | Methods of preventing bacterial sepsis and wound complications after liver transplantation | Not applicable                     | 1. Mortality.<br>2. HRQoL.<br>3. Complications. |
| 28<br>29<br>30<br>31<br>32<br>33<br>34                                     | People undergoing liver transplantation | Techniques of flushing and reperfusion                                                     | Not applicable                     | 1. Mortality.<br>2. HRQoL.<br>3. Complications. |
| 35<br>36<br>37<br>38<br>39<br>40<br>41                                     | People undergoing liver transplantation | Abdominal drainage                                                                         | No intervention                    | 1. Mortality.<br>2. HRQoL.<br>3. Complications. |
| 42<br>43<br>44<br>45<br>46<br>47                                           | People undergoing liver transplantation | Piggy-back                                                                                 | Conventional liver transplantation | 1. Mortality.<br>2. HRQoL.<br>3. Complications. |
| 48<br>49<br>50<br>51<br>52<br>53<br>54<br>55<br>56<br>57<br>58<br>59<br>60 | People undergoing liver transplantation | Methods to decrease blood loss and transfusion requirements                                | Not applicable                     | 1. Mortality.<br>2. HRQoL.<br>3. Complications. |



|                                                                            |                                                                   |                                                                         |                                                              |                                                 |
|----------------------------------------------------------------------------|-------------------------------------------------------------------|-------------------------------------------------------------------------|--------------------------------------------------------------|-------------------------------------------------|
| 1<br>2<br>3<br>4<br>5<br>6<br>7<br>8<br>9                                  | People undergoing liver transplantation                           | Antiviral prophylaxis for prevention of hepatitis C infection           | Not applicable                                               | 1. Mortality.<br>2. HRQoL.<br>3. Complications. |
| 10<br>11<br>12<br>13<br>14<br>15<br>16                                     | People undergoing liver transplantation                           | Antiviral treatment of hepatitis C infection                            | Not applicable                                               | 1. Mortality.<br>2. HRQoL.<br>3. Complications. |
| 17<br>18<br>19<br>20<br>21<br>22<br>23<br>24<br>25<br>26<br>27             | People undergoing liver transplantation for hepatitis B infection | Lamivudine or adefovir dipivoxil                                        | No intervention/other interventions including immunoglobulin | 1. Mortality.<br>2. HRQoL.<br>3. Complications. |
| 28<br>29<br>30<br>31<br>32<br>33<br>34                                     | People undergoing liver transplantation                           | Nutritional interventions                                               | Not applicable                                               | 1. Mortality.<br>2. HRQoL.<br>3. Complications. |
| 35<br>36<br>37<br>38<br>39<br>40<br>41                                     | People undergoing liver transplantation                           | Bile acids                                                              | No intervention/other interventions                          | 1. Mortality.<br>2. HRQoL.<br>3. Complications. |
| 42<br>43<br>44<br>45<br>46<br>47                                           | People undergoing liver transplantation                           | Celsior solution                                                        | UW solution                                                  | 1. Mortality.<br>2. HRQoL.<br>3. Complications. |
| 48<br>49<br>50<br>51<br>52<br>53<br>54<br>55<br>56<br>57<br>58<br>59<br>60 | People undergoing liver resection                                 | Pharmacological interventions for reducing ischaemia reperfusion injury | No intervention/other interventions                          | 1. Mortality.<br>2. HRQoL.<br>3. Complications. |

|                                                                |                                                                         |                                       |                                     |                                                 |
|----------------------------------------------------------------|-------------------------------------------------------------------------|---------------------------------------|-------------------------------------|-------------------------------------------------|
| 1<br>2<br>3<br>4<br>5<br>6<br>7<br>8<br>9                      | People undergoing liver resection                                       | Fibrin-based haemostatic agents       | No intervention/other interventions | 1. Mortality.<br>2. HRQoL.<br>3. Complications. |
| 10<br>11<br>12<br>13<br>14<br>15<br>16                         | People undergoing liver resection for colorectal liver metastases       | Neoadjuvant chemotherapy              | No intervention/other interventions | 1. Mortality.<br>2. HRQoL.<br>3. Complications. |
| 17<br>18<br>19<br>20<br>21<br>22<br>23                         | People with colorectal liver metastases                                 | Resection                             | Other interventions                 | 1. Mortality.<br>2. HRQoL.<br>3. Complications. |
| 24<br>25<br>26<br>27<br>28<br>29                               | People undergoing liver resection                                       | Ischaemic preconditioning             | No intervention                     | 1. Mortality.<br>2. HRQoL.<br>3. Complications. |
| 30<br>31<br>32<br>33<br>34<br>35<br>36                         | People undergoing liver resection                                       | Interventions for reducing blood loss | No intervention/other interventions | 1. Mortality.<br>2. HRQoL.<br>3. Complications. |
| 37<br>38<br>39<br>40<br>41<br>42<br>43                         | People undergoing liver resection                                       | Methods of decreasing infection       | No intervention/other interventions | 1. Mortality.<br>2. HRQoL.<br>3. Complications. |
| 44<br>45<br>46<br>47<br>48<br>49                               | People with hepatic node positive colorectal liver metastases           | Resection                             | No resection                        | 1. Mortality.<br>2. HRQoL.<br>3. Complications. |
| 50<br>51<br>52<br>53<br>54<br>55<br>56<br>57<br>58<br>59<br>60 | People undergoing liver resection for resectable neuroendocrine tumours | Resection                             | No resection                        | 1. Mortality.<br>2. HRQoL.<br>3. Complications. |

|                                                                |                                                                              |                                      |                                     |                                                 |
|----------------------------------------------------------------|------------------------------------------------------------------------------|--------------------------------------|-------------------------------------|-------------------------------------------------|
| 1<br>2<br>3<br>4<br>5<br>6<br>7<br>8<br>9                      | People undergoing liver resection or ablation of colorectal liver metastases | Hepatic artery adjuvant chemotherapy | No intervention/other interventions | 1. Mortality.<br>2. HRQoL.<br>3. Complications. |
| 10<br>11<br>12<br>13<br>14<br>15<br>16                         | People undergoing liver resection                                            | Laparoscopic liver resection         | Open liver resection                | 1. Mortality.<br>2. HRQoL.<br>3. Complications. |
| 17<br>18<br>19<br>20<br>21<br>22<br>23                         | People with hepatic encephalopathy                                           | Nonabsorbable disaccharides          | No intervention/other interventions | 1. Mortality.<br>2. HRQoL.<br>3. Complications. |
| 24<br>25<br>26<br>27<br>28<br>29                               | People with hepatic encephalopathy                                           | Benzodiazepine receptor antagonists  | No intervention/other interventions | 1. Mortality.<br>2. HRQoL.<br>3. Complications. |
| 30<br>31<br>32<br>33<br>34<br>35<br>36                         | People with hepatic encephalopathy                                           | Antibiotics                          | No intervention/other interventions | 1. Mortality.<br>2. HRQoL.<br>3. Complications. |
| 37<br>38<br>39<br>40<br>41<br>42<br>43                         | People with hepatic encephalopathy                                           | Dopamine agents                      | No intervention/other interventions | 1. Mortality.<br>2. HRQoL.<br>3. Complications. |
| 44<br>45<br>46<br>47<br>48<br>49                               | People with hepatic encephalopathy                                           | Rifaximin                            | No intervention/other interventions | 1. Mortality.<br>2. HRQoL.<br>3. Complications. |
| 50<br>51<br>52<br>53<br>54<br>55<br>56<br>57<br>58<br>59<br>60 | People with hepatic encephalopathy                                           | Acetyl-L-carnitine                   | No intervention/other interventions | 1. Mortality.<br>2. HRQoL.<br>3. Complications. |

|                                                                |                                    |                                   |                                     |                                                 |
|----------------------------------------------------------------|------------------------------------|-----------------------------------|-------------------------------------|-------------------------------------------------|
| 1<br>2<br>3<br>4<br>5<br>6<br>7<br>8<br>9                      | People with hepatic encephalopathy | Probiotics                        | No intervention/other interventions | 1. Mortality.<br>2. HRQoL.<br>3. Complications. |
| 10<br>11<br>12<br>13<br>14<br>15<br>16                         | People with hepatic encephalopathy | Naloxone                          | No intervention/other interventions | 1. Mortality.<br>2. HRQoL.<br>3. Complications. |
| 17<br>18<br>19<br>20<br>21<br>22<br>23                         | People with hepatic encephalopathy | L-ornithine-L-aspartate           | No intervention/other interventions | 1. Mortality.<br>2. HRQoL.<br>3. Complications. |
| 24<br>25<br>26<br>27<br>28<br>29                               | People with NAFLD                  | Pharmacological treatments        | Not applicable                      | 1. Mortality.<br>2. HRQoL.<br>3. Complications. |
| 30<br>31<br>32<br>33<br>34<br>35<br>36                         | People with NAFLD                  | Herbal medicines                  | No intervention/other interventions | 1. Mortality.<br>2. HRQoL.<br>3. Complications. |
| 37<br>38<br>39<br>40<br>41<br>42<br>43                         | People with NAFLD                  | Weight reduction                  | Not applicable                      | 1. Mortality.<br>2. HRQoL.<br>3. Complications. |
| 44<br>45<br>46<br>47<br>48<br>49                               | People with liver metastases       | Transarterial (chemo)embolisation | No intervention/other interventions | 1. Mortality.<br>2. HRQoL.<br>3. Complications. |
| 50<br>51<br>52<br>53<br>54<br>55<br>56<br>57<br>58<br>59<br>60 | People with liver metastases       | Microwave coagulation             | No intervention/other interventions | 1. Mortality.<br>2. HRQoL.<br>3. Complications. |

|                                                                |                                                                |                                         |                                            |                                                 |
|----------------------------------------------------------------|----------------------------------------------------------------|-----------------------------------------|--------------------------------------------|-------------------------------------------------|
| 1<br>2<br>3<br>4<br>5<br>6<br>7<br>8<br>9                      | People with liver metastases                                   | Cryotherapy                             | No<br>intervention/oth<br>er interventions | 1. Mortality.<br>2. HRQoL.<br>3. Complications. |
| 10<br>11<br>12<br>13<br>14<br>15<br>16                         | People with liver metastases                                   | Radiofrequency<br>ablation              | No<br>intervention/oth<br>er interventions | 1. Mortality.<br>2. HRQoL.<br>3. Complications. |
| 17<br>18<br>19<br>20<br>21<br>22<br>23                         | People with unresectable<br>neuroendocrine liver<br>metastases | Palliative cytoreductive<br>surgery     | Other palliative<br>interventions          | 1. Mortality.<br>2. HRQoL.<br>3. Complications. |
| 24<br>25<br>26<br>27<br>28<br>29                               | People with unresectable<br>colorectal liver metastases        | Hepatic arterial<br>infusion            | Systemic<br>chemotherapy                   | 1. Mortality.<br>2. HRQoL.<br>3. Complications. |
| 30<br>31<br>32<br>33<br>34<br>35<br>36                         | People with liver metastases                                   | Electro-coagulation                     | No<br>intervention/oth<br>er interventions | 1. Mortality.<br>2. HRQoL.<br>3. Complications. |
| 37<br>38<br>39<br>40<br>41<br>42<br>43                         | People with liver metastases                                   | Percutaneous ethanol<br>injection       | No<br>intervention/oth<br>er interventions | 1. Mortality.<br>2. HRQoL.<br>3. Complications. |
| 44<br>45<br>46<br>47<br>48<br>49                               | People with unresectable<br>colorectal liver metastases        | Chemotherapy for<br>downstaging         | No<br>intervention/oth<br>er interventions | 1. Mortality.<br>2. HRQoL.<br>3. Complications. |
| 50<br>51<br>52<br>53<br>54<br>55<br>56<br>57<br>58<br>59<br>60 | People with colorectal liver<br>metastases                     | Selective internal<br>radiation therapy | No<br>intervention/oth<br>er interventions | 1. Mortality.<br>2. HRQoL.<br>3. Complications. |

|                                                                                                                                                                                                                                                                                                                                                             |                                                                        |                                    |                               |                                                 |
|-------------------------------------------------------------------------------------------------------------------------------------------------------------------------------------------------------------------------------------------------------------------------------------------------------------------------------------------------------------|------------------------------------------------------------------------|------------------------------------|-------------------------------|-------------------------------------------------|
| 1<br>2<br>3<br>4<br>5<br>6<br>7<br>8<br>9<br>10<br>11<br>12<br>13<br>14<br>15<br>16<br>17<br>18<br>19<br>20<br>21<br>22<br>23<br>24<br>25<br>26<br>27<br>28<br>29<br>30<br>31<br>32<br>33<br>34<br>35<br>36<br>37<br>38<br>39<br>40<br>41<br>42<br>43<br>44<br>45<br>46<br>47<br>48<br>49<br>50<br>51<br>52<br>53<br>54<br>55<br>56<br>57<br>58<br>59<br>60 | People with gallbladder polyp                                          | Cholecystectomy                    | No cholecystectomy            | 1. Mortality.<br>2. HRQoL.<br>3. Complications. |
|                                                                                                                                                                                                                                                                                                                                                             | People with gallbladder dyskinesia                                     | Cholecystectomy                    | No cholecystectomy            | 1. Mortality.<br>2. HRQoL.<br>3. Complications. |
|                                                                                                                                                                                                                                                                                                                                                             | People undergoing laparoscopic cholecystectomy                         | Methods of cystic duct occlusion   | Not applicable                | 1. Mortality.<br>2. HRQoL.<br>3. Complications. |
|                                                                                                                                                                                                                                                                                                                                                             | People undergoing laparoscopic cholecystectomy for acute cholecystitis | Early laparoscopic cholecystectomy | Delayed cholecystectomy       | 1. Mortality.<br>2. HRQoL.<br>3. Complications. |
|                                                                                                                                                                                                                                                                                                                                                             | People undergoing cholecystectomy                                      | Laparoscopic cholecystectomy       | Open cholecystectomy          | 1. Mortality.<br>2. HRQoL.<br>3. Complications. |
|                                                                                                                                                                                                                                                                                                                                                             | People undergoing cholecystectomy                                      | Laparoscopic cholecystectomy       | Mini-incision cholecystectomy | 1. Mortality.<br>2. HRQoL.<br>3. Complications. |
|                                                                                                                                                                                                                                                                                                                                                             | People undergoing cholecystectomy                                      | Mini-incision cholecystectomy      | Open cholecystectomy          | 1. Mortality.<br>2. HRQoL.<br>3. Complications. |
|                                                                                                                                                                                                                                                                                                                                                             | People undergoing laparoscopic cholecystectomy                         | Abdominal wall lift                | Pneumoperitoneum              | 1. Mortality.<br>2. HRQoL.<br>3. Complications. |

|                                                                                                                                                                                                                                                                                                                                                             |                                                                  |                                                           |                         |                                                 |
|-------------------------------------------------------------------------------------------------------------------------------------------------------------------------------------------------------------------------------------------------------------------------------------------------------------------------------------------------------------|------------------------------------------------------------------|-----------------------------------------------------------|-------------------------|-------------------------------------------------|
| 1<br>2<br>3<br>4<br>5<br>6<br>7<br>8<br>9<br>10<br>11<br>12<br>13<br>14<br>15<br>16<br>17<br>18<br>19<br>20<br>21<br>22<br>23<br>24<br>25<br>26<br>27<br>28<br>29<br>30<br>31<br>32<br>33<br>34<br>35<br>36<br>37<br>38<br>39<br>40<br>41<br>42<br>43<br>44<br>45<br>46<br>47<br>48<br>49<br>50<br>51<br>52<br>53<br>54<br>55<br>56<br>57<br>58<br>59<br>60 | People undergoing laparoscopic cholecystectomy                   | Abdominal drainage                                        | No drain                | 1. Mortality.<br>2. HRQoL.<br>3. Complications. |
|                                                                                                                                                                                                                                                                                                                                                             | People undergoing laparoscopic cholecystectomy for biliary colic | Early laparoscopic cholecystectomy                        | Delayed cholecystectomy | 1. Mortality.<br>2. HRQoL.<br>3. Complications. |
|                                                                                                                                                                                                                                                                                                                                                             | People undergoing laparoscopic cholecystectomy                   | Intra-peritoneal saline instillation                      | No instillation         | 1. Mortality.<br>2. HRQoL.<br>3. Complications. |
|                                                                                                                                                                                                                                                                                                                                                             | People undergoing laparoscopic cholecystectomy                   | Methods of intraperitoneal local anaesthetic instillation | Not applicable          | 1. Mortality.<br>2. HRQoL.<br>3. Complications. |
|                                                                                                                                                                                                                                                                                                                                                             | People undergoing laparoscopic cholecystectomy                   | Methods of local anaesthetic wound infiltration           | Not applicable          | 1. Mortality.<br>2. HRQoL.<br>3. Complications. |
|                                                                                                                                                                                                                                                                                                                                                             | People undergoing laparoscopic cholecystectomy                   | Three-dimensional imaging                                 | Two-dimensional imaging | 1. Mortality.<br>2. HRQoL.<br>3. Complications. |
|                                                                                                                                                                                                                                                                                                                                                             | People with asymptomatic gallstones                              | Cholecystectomy                                           | No cholecystectomy      | 1. Mortality.<br>2. HRQoL.<br>3. Complications. |
|                                                                                                                                                                                                                                                                                                                                                             | People undergoing open cholecystectomy                           | Abdominal drainage                                        | No drain                | 1. Mortality.<br>2. HRQoL.<br>3. Complications. |

|                                                                                        |                                                |                                                                                 |                                    |                                                 |
|----------------------------------------------------------------------------------------|------------------------------------------------|---------------------------------------------------------------------------------|------------------------------------|-------------------------------------------------|
| 1<br>2<br>3<br>4<br>5<br>6<br>7<br>8<br>9                                              | People undergoing laparoscopic cholecystectomy | Robotic assistant                                                               | Human assistant                    | 1. Mortality.<br>2. HRQoL.<br>3. Complications. |
| 10<br>11<br>12<br>13<br>14<br>15<br>16                                                 | People undergoing laparoscopic cholecystectomy | Methods of gallbladder dissection                                               | Not applicable                     | 1. Mortality.<br>2. HRQoL.<br>3. Complications. |
| 17<br>18<br>19<br>20<br>21<br>22<br>23<br>24<br>25                                     | People undergoing laparoscopic cholecystectomy | Low pressure pneumoperitoneum                                                   | Standard pressure pneumoperitoneum | 1. Mortality.<br>2. HRQoL.<br>3. Complications. |
| 26<br>27<br>28<br>29<br>30<br>31<br>32                                                 | People undergoing laparoscopic cholecystectomy | Education of patients                                                           | Standard care                      | 1. Mortality.<br>2. HRQoL.<br>3. Complications. |
| 33<br>34<br>35<br>36<br>37<br>38                                                       | People undergoing laparoscopic cholecystectomy | Miniports                                                                       | Standard ports                     | 1. Mortality.<br>2. HRQoL.<br>3. Complications. |
| 39<br>40<br>41<br>42<br>43<br>44<br>45                                                 | People undergoing laparoscopic cholecystectomy | Number of ports                                                                 | Not applicable                     | 1. Mortality.<br>2. HRQoL.<br>3. Complications. |
| 46<br>47<br>48<br>49<br>50<br>51<br>52<br>53<br>54<br>55<br>56<br>57<br>58<br>59<br>60 | People undergoing laparoscopic cholecystectomy | Pharmacological interventions for prevention or treatment of postoperative pain | Not applicable                     | 1. Mortality.<br>2. HRQoL.<br>3. Complications. |



|                                                                                                                                                                                                                                                                                                                                                             |                                                                                         |                                             |                                         |                                                 |
|-------------------------------------------------------------------------------------------------------------------------------------------------------------------------------------------------------------------------------------------------------------------------------------------------------------------------------------------------------------|-----------------------------------------------------------------------------------------|---------------------------------------------|-----------------------------------------|-------------------------------------------------|
| 1<br>2<br>3<br>4<br>5<br>6<br>7<br>8<br>9<br>10<br>11<br>12<br>13<br>14<br>15<br>16<br>17<br>18<br>19<br>20<br>21<br>22<br>23<br>24<br>25<br>26<br>27<br>28<br>29<br>30<br>31<br>32<br>33<br>34<br>35<br>36<br>37<br>38<br>39<br>40<br>41<br>42<br>43<br>44<br>45<br>46<br>47<br>48<br>49<br>50<br>51<br>52<br>53<br>54<br>55<br>56<br>57<br>58<br>59<br>60 | People undergoing laparoscopic cholecystectomy                                          | Glucocorticoids                             | No intervention                         | 1. Mortality.<br>2. HRQoL.<br>3. Complications. |
|                                                                                                                                                                                                                                                                                                                                                             | People who have undergone endoscopic sphincterotomy for gallstone related complications | Early cholecystectomy                       | Delayed or no cholecystectomy           | 1. Mortality.<br>2. HRQoL.<br>3. Complications. |
|                                                                                                                                                                                                                                                                                                                                                             | People undergoing laparoscopic cholecystectomy                                          | Antibiotic prophylaxis                      | Not applicable                          | 1. Mortality.<br>2. HRQoL.<br>3. Complications. |
|                                                                                                                                                                                                                                                                                                                                                             | People undergoing laparoscopic cholecystectomy                                          | Day surgery                                 | Overnight stay                          | 1. Mortality.<br>2. HRQoL.<br>3. Complications. |
|                                                                                                                                                                                                                                                                                                                                                             | People undergoing day surgery laparoscopic cholecystectomy                              | Anaesthetic regimens                        | Not applicable                          | 1. Mortality.<br>2. HRQoL.<br>3. Complications. |
|                                                                                                                                                                                                                                                                                                                                                             | People with common bile duct stones undergoing laparoscopic cholecystectomy             | Per-operative endoscopic sphincterotomy     | Pre-operative endoscopic sphincterotomy | 1. Mortality.<br>2. HRQoL.<br>3. Complications. |
|                                                                                                                                                                                                                                                                                                                                                             | People with suspected bile duct stenosis                                                | Magnetic resonance cholangiopancreatography | Not applicable                          | 1. Mortality.<br>2. HRQoL.<br>3. Complications. |

|                                                       |                                                    |                                                |                                             |                                                 |
|-------------------------------------------------------|----------------------------------------------------|------------------------------------------------|---------------------------------------------|-------------------------------------------------|
| 1<br>2<br>3<br>4<br>5<br>6<br>7<br>8<br>9<br>10<br>11 | People with suspected bile duct stones             | Endoscopic ultrasound                          | Magnetic resonance cholangiopancreatography | 1. Mortality.<br>2. HRQoL.<br>3. Complications. |
| 12<br>13<br>14<br>15<br>16<br>17<br>18                | People with suspected bile duct stones             | Endoscopic retrograde cholangiopancreatography | Intraoperative cholangiography              | 1. Mortality.<br>2. HRQoL.<br>3. Complications. |
| 19<br>20<br>21<br>22<br>23<br>24<br>25                | People with suspected bile duct stones             | Liver function tests                           | Transabdominal ultrasound                   | 1. Mortality.<br>2. HRQoL.<br>3. Complications. |
| 26<br>27<br>28<br>29<br>30<br>31<br>32                | People undergoing surgery for biliary tract cancer | Pre-operative biliary stenting                 | No stenting                                 | 1. Mortality.<br>2. HRQoL.<br>3. Complications. |
| 33<br>34<br>35<br>36<br>37<br>38                      | People with uncomplicated amoebic liver abscess    | Percutaneous procedure plus metronidazole      | Metronidazole alone                         | 1. Mortality.<br>2. HRQoL.<br>3. Complications. |
| 39<br>40<br>41<br>42<br>43<br>44<br>45                | People with benign liver tumours                   | Liver resection                                | No liver resection                          | 1. Mortality.<br>2. HRQoL.<br>3. Complications. |
| 46<br>47<br>48<br>49<br>50<br>51<br>52                | People with sphincter of oddi dysfunction          | Sphincterotomy                                 | No sphincterotomy                           | 1. Mortality.<br>2. HRQoL.<br>3. Complications. |
| 53<br>54<br>55<br>56<br>57<br>58<br>59<br>60          | People with cirrhosis                              | Colchicine                                     | No intervention/other interventions         | 1. Mortality.<br>2. HRQoL.<br>3. Complications. |

|                                                    |                                     |                                                                    |                                     |                                                 |
|----------------------------------------------------|-------------------------------------|--------------------------------------------------------------------|-------------------------------------|-------------------------------------------------|
| 1<br>2<br>3<br>4<br>5<br>6<br>7<br>8<br>9          | People with blunt liver injury      | Non-surgical treatment                                             | Surgery                             | 1. Mortality.<br>2. HRQoL.<br>3. Complications. |
| 10<br>11<br>12<br>13<br>14<br>15<br>16             | People with common bile duct stones | Surgical treatment                                                 | Endoscopic intervention             | 1. Mortality.<br>2. HRQoL.<br>3. Complications. |
| 17<br>18<br>19<br>20<br>21<br>22<br>23             | People at risk of gallstones        | Lifestyle: Diets for primary prevention of gallstones              | Not applicable                      | 1. Mortality.<br>2. HRQoL.<br>3. Complications. |
| 24<br>25<br>26<br>27<br>28<br>29<br>30<br>31<br>32 | People at risk of gallstones        | Pharmacological interventions for primary prevention of gallstones | Not applicable                      | 1. Mortality.<br>2. HRQoL.<br>3. Complications. |
| 33<br>34<br>35<br>36<br>37<br>38                   | People with common bile duct stones | Sphincteroplasty                                                   | Sphincterotomy                      | 1. Mortality.<br>2. HRQoL.<br>3. Complications. |
| 39<br>40<br>41<br>42<br>43<br>44<br>45             | People with biliary colic           | Bile acids                                                         | No intervention/other interventions | 1. Mortality.<br>2. HRQoL.<br>3. Complications. |
| 46<br>47<br>48<br>49<br>50<br>51<br>52             | People with biliary colic           | Non-steroidal anti-inflammatory drugs                              | No intervention/other interventions | 1. Mortality.<br>2. HRQoL.<br>3. Complications. |
| 53<br>54<br>55<br>56<br>57<br>58<br>59<br>60       | People with chronic hepatitis C     | Pharmacological treatments                                         | Not applicable                      | 1. Mortality.<br>2. HRQoL.<br>3. Complications. |

|                                                                                                                                                                                                                                                                                                                                                             |                                 |                                                 |                                     |                                                 |
|-------------------------------------------------------------------------------------------------------------------------------------------------------------------------------------------------------------------------------------------------------------------------------------------------------------------------------------------------------------|---------------------------------|-------------------------------------------------|-------------------------------------|-------------------------------------------------|
| 1<br>2<br>3<br>4<br>5<br>6<br>7<br>8<br>9<br>10<br>11<br>12<br>13<br>14<br>15<br>16<br>17<br>18<br>19<br>20<br>21<br>22<br>23<br>24<br>25<br>26<br>27<br>28<br>29<br>30<br>31<br>32<br>33<br>34<br>35<br>36<br>37<br>38<br>39<br>40<br>41<br>42<br>43<br>44<br>45<br>46<br>47<br>48<br>49<br>50<br>51<br>52<br>53<br>54<br>55<br>56<br>57<br>58<br>59<br>60 | People with chronic hepatitis B | Pharmacological treatments                      | Not applicable                      | 1. Mortality.<br>2. HRQoL.<br>3. Complications. |
|                                                                                                                                                                                                                                                                                                                                                             | People with chronic hepatitis D | Pharmacological treatments                      | Not applicable                      | 1. Mortality.<br>2. HRQoL.<br>3. Complications. |
|                                                                                                                                                                                                                                                                                                                                                             | People exposed to hepatitis A   | Post-exposure vaccines                          | Not applicable                      | 1. Mortality.<br>2. HRQoL.<br>3. Complications. |
|                                                                                                                                                                                                                                                                                                                                                             | General population              | Immunisation against Hepatitis A                | No immunisation                     | 1. Mortality.<br>2. HRQoL.<br>3. Complications. |
|                                                                                                                                                                                                                                                                                                                                                             | People exposed to hepatitis A   | Post-exposure immunoglobulins                   | Not applicable                      | 1. Mortality.<br>2. HRQoL.<br>3. Complications. |
|                                                                                                                                                                                                                                                                                                                                                             | People with biliary stent       | Ursodeoxycholic acid to prevent stent occlusion | No intervention/other interventions | 1. Mortality.<br>2. HRQoL.<br>3. Complications. |
|                                                                                                                                                                                                                                                                                                                                                             | People with acute hepatitis B   | Pharmacological treatments                      | Not applicable                      | 1. Mortality.<br>2. HRQoL.<br>3. Complications. |
|                                                                                                                                                                                                                                                                                                                                                             | Healthcare professionals        | Hepatitis B vaccination                         | Not applicable                      | 1. Mortality.<br>2. HRQoL.<br>3. Complications. |

|                                                                  |                         |                                     |                                                 |
|------------------------------------------------------------------|-------------------------|-------------------------------------|-------------------------------------------------|
| Pregnant women with Hepatitis B                                  | Immunoglobulins         | No intervention/other interventions | 1. Mortality.<br>2. HRQoL.<br>3. Complications. |
| Newborns of HBSAg (hepatitis B surface antigen) positive mothers | Immunisation            | No intervention/other interventions | 1. Mortality.<br>2. HRQoL.<br>3. Complications. |
| People with chronic hepatitis B                                  | Medicinal herbs         | No intervention/other interventions | 1. Mortality.<br>2. HRQoL.<br>3. Complications. |
| Asymptomatic Hepatitis B carriers                                | Medicinal herbs         | No intervention/other interventions | 1. Mortality.<br>2. HRQoL.<br>3. Complications. |
| People with chronic hepatitis B                                  | Acupuncture             | No intervention/other interventions | 1. Mortality.<br>2. HRQoL.<br>3. Complications. |
| People with acute hepatitis B                                    | Medicinal herbs         | No intervention/other interventions | 1. Mortality.<br>2. HRQoL.<br>3. Complications. |
| General population                                               | Hepatitis B vaccination | Not applicable                      | 1. Mortality.<br>2. HRQoL.<br>3. Complications. |
| Pregnant women with Hepatitis B                                  | Lamivudine              | No intervention/other interventions | 1. Mortality.<br>2. HRQoL.<br>3. Complications. |

|                                                                |                                                           |                                               |                                     |                                                 |
|----------------------------------------------------------------|-----------------------------------------------------------|-----------------------------------------------|-------------------------------------|-------------------------------------------------|
| 1<br>2<br>3<br>4<br>5<br>6<br>7<br>8<br>9                      | People with HIV infection                                 | Hepatitis B vaccination                       | Not applicable                      | 1. Mortality.<br>2. HRQoL.<br>3. Complications. |
| 10<br>11<br>12<br>13<br>14<br>15<br>16                         | People who have received Hepatitis B vaccination          | Booster dose                                  | No booster dose                     | 1. Mortality.<br>2. HRQoL.<br>3. Complications. |
| 17<br>18<br>19<br>20<br>21<br>22<br>23                         | Pregnant women with Hepatitis B                           | Hepatitis B vaccination                       | No intervention/other interventions | 1. Mortality.<br>2. HRQoL.<br>3. Complications. |
| 24<br>25<br>26<br>27<br>28<br>29                               | People with renal failure                                 | Hepatitis B vaccination                       | No intervention/other interventions | 1. Mortality.<br>2. HRQoL.<br>3. Complications. |
| 30<br>31<br>32<br>33<br>34<br>35<br>36                         | People with chronic hepatitis C and peripheral neuropathy | Treatments                                    | Not applicable                      | 1. Mortality.<br>2. HRQoL.<br>3. Complications. |
| 37<br>38<br>39<br>40<br>41<br>42<br>43                         | People in haemodialysis units                             | Isolation to prevent Hepatitis C transmission | No isolation                        | 1. Mortality.<br>2. HRQoL.<br>3. Complications. |
| 44<br>45<br>46<br>47<br>48<br>49                               | People with acute hepatitis C                             | Pharmacological treatments                    | Not applicable                      | 1. Mortality.<br>2. HRQoL.<br>3. Complications. |
| 50<br>51<br>52<br>53<br>54<br>55<br>56<br>57<br>58<br>59<br>60 | People with chronic hepatitis C and HIV                   | Antiviral treatment                           | Not applicable                      | 1. Mortality.<br>2. HRQoL.<br>3. Complications. |

|                                                                                                                                                                                                                                                                                                                                                             |                                                          |                                 |                                     |                                                 |
|-------------------------------------------------------------------------------------------------------------------------------------------------------------------------------------------------------------------------------------------------------------------------------------------------------------------------------------------------------------|----------------------------------------------------------|---------------------------------|-------------------------------------|-------------------------------------------------|
| 1<br>2<br>3<br>4<br>5<br>6<br>7<br>8<br>9<br>10<br>11<br>12<br>13<br>14<br>15<br>16<br>17<br>18<br>19<br>20<br>21<br>22<br>23<br>24<br>25<br>26<br>27<br>28<br>29<br>30<br>31<br>32<br>33<br>34<br>35<br>36<br>37<br>38<br>39<br>40<br>41<br>42<br>43<br>44<br>45<br>46<br>47<br>48<br>49<br>50<br>51<br>52<br>53<br>54<br>55<br>56<br>57<br>58<br>59<br>60 | People with chronic hepatitis C                          | Medicinal herbs                 | No intervention/other interventions | 1. Mortality.<br>2. HRQoL.<br>3. Complications. |
|                                                                                                                                                                                                                                                                                                                                                             | Pregnant women with Hepatitis B                          | Caesarean section               | Vaginal delivery                    | 1. Mortality.<br>2. HRQoL.<br>3. Complications. |
|                                                                                                                                                                                                                                                                                                                                                             | People with chronic hepatitis C with vasculitis          | Treatments                      | Not applicable                      | 1. Mortality.<br>2. HRQoL.<br>3. Complications. |
|                                                                                                                                                                                                                                                                                                                                                             | People with chronic hepatitis C                          | Staging of liver disease        | Not applicable                      | 1. Mortality.<br>2. HRQoL.<br>3. Complications. |
|                                                                                                                                                                                                                                                                                                                                                             | People with primary biliary cholangitis and osteoporosis | Biphosphonates                  | No intervention/other interventions | 1. Mortality.<br>2. HRQoL.<br>3. Complications. |
|                                                                                                                                                                                                                                                                                                                                                             | People with primary biliary cholangitis and osteoporosis | Hormonal replacement therapy    | No intervention/other interventions | 1. Mortality.<br>2. HRQoL.<br>3. Complications. |
|                                                                                                                                                                                                                                                                                                                                                             | People with bleeding oesophageal varices                 | People with portosystemic shunt | No intervention/other interventions | 1. Mortality.<br>2. HRQoL.<br>3. Complications. |
|                                                                                                                                                                                                                                                                                                                                                             | People with hepatorenal syndrome                         | Terlipressin                    | No intervention/other interventions | 1. Mortality.<br>2. HRQoL.<br>3. Complications. |

|                                                                |                                                                   |                                                |                                     |                                                 |
|----------------------------------------------------------------|-------------------------------------------------------------------|------------------------------------------------|-------------------------------------|-------------------------------------------------|
| 1<br>2<br>3<br>4<br>5<br>6<br>7<br>8<br>9                      | People with hepatorenal syndrome                                  | Transjugular intrahepatic portosystemic shunts | No intervention/other interventions | 1. Mortality.<br>2. HRQoL.<br>3. Complications. |
| 10<br>11<br>12<br>13<br>14<br>15<br>16                         | People undergoing common bile duct exploration                    | T-tube                                         | No T-tube                           | 1. Mortality.<br>2. HRQoL.<br>3. Complications. |
| 17<br>18<br>19<br>20<br>21<br>22<br>23                         | People with acute calculous cholecystitis (high risk)             | Percutaneous cholecystostomy                   | No intervention/other interventions | 1. Mortality.<br>2. HRQoL.<br>3. Complications. |
| 24<br>25<br>26<br>27<br>28<br>29                               | People undergoing liver resection                                 | Enhanced recovery protocols                    | Standard intervention               | 1. Mortality.<br>2. HRQoL.<br>3. Complications. |
| 30<br>31<br>32<br>33<br>34<br>35<br>36                         | People undergoing liver transplantation                           | Perfusion techniques in donor                  | Not applicable                      | 1. Mortality.<br>2. HRQoL.<br>3. Complications. |
| 37<br>38<br>39<br>40<br>41<br>42<br>43                         | People with gallstones                                            | Chinese herbs                                  | Not applicable                      | 1. Mortality.<br>2. HRQoL.<br>3. Complications. |
| 44<br>45<br>46<br>47<br>48<br>49                               | Pregnant women with cholestasis                                   | Interventions                                  | Not applicable                      | 1. Mortality.<br>2. HRQoL.<br>3. Complications. |
| 50<br>51<br>52<br>53<br>54<br>55<br>56<br>57<br>58<br>59<br>60 | New-borns and infants receiving parenteral nutrition and jaundice | Pharmacological interventions                  | Not applicable                      | 1. Mortality.<br>2. HRQoL.<br>3. Complications. |



|                                                                |                                                                   |                                        |                                     |                                                 |
|----------------------------------------------------------------|-------------------------------------------------------------------|----------------------------------------|-------------------------------------|-------------------------------------------------|
| 1<br>2<br>3<br>4<br>5<br>6<br>7<br>8<br>9                      | New-borns and infants receiving parenteral nutrition and jaundice | Alternate interventions                | Not applicable                      | 1. Mortality.<br>2. HRQoL.<br>3. Complications. |
| 10<br>11<br>12<br>13<br>14<br>15<br>16                         | People with sickle cell disease and intrahepatic cholestasis      | Interventions                          | Not applicable                      | 1. Mortality.<br>2. HRQoL.<br>3. Complications. |
| 17<br>18<br>19<br>20<br>21<br>22                               | People with liver disease with upper gastrointestinal bleeding    | Human recombinant activated factor VII | No intervention/other interventions | 1. Mortality.<br>2. HRQoL.<br>3. Complications. |
| 23<br>24<br>25<br>26<br>27<br>28<br>29                         | People with liver disease with upper gastrointestinal bleeding    | Vitamin K                              | No intervention/other interventions | 1. Mortality.<br>2. HRQoL.<br>3. Complications. |
| 30<br>31<br>32<br>33<br>34<br>35<br>36                         | People with liver disease with upper gastrointestinal bleeding    | Antifibrinolytic amino acids           | No intervention/other interventions | 1. Mortality.<br>2. HRQoL.<br>3. Complications. |
| 37<br>38<br>39<br>40<br>41<br>42<br>43                         | People with liver disease                                         | Antioxidant supplements                | No intervention                     | 1. Mortality.<br>2. HRQoL.<br>3. Complications. |
| 44<br>45<br>46<br>47<br>48<br>49                               | People with liver disease                                         | Vitamin D supplements                  | No intervention                     | 1. Mortality.<br>2. HRQoL.<br>3. Complications. |
| 50<br>51<br>52<br>53<br>54<br>55<br>56<br>57<br>58<br>59<br>60 | People with liver disease                                         | Lifestyle: Nutritional support         | Not applicable                      | 1. Mortality.<br>2. HRQoL.<br>3. Complications. |

|                                                                                                                      |                                                                                           |                                                                                 |                                                                                    |                                                 |
|----------------------------------------------------------------------------------------------------------------------|-------------------------------------------------------------------------------------------|---------------------------------------------------------------------------------|------------------------------------------------------------------------------------|-------------------------------------------------|
| 1<br>2<br>3<br>4<br>5<br>6<br>7<br>8<br>9<br>10<br>11                                                                | People with adverse events related to chemoarterial embolisation for primary liver cancer | Chinese herbs                                                                   | Not applicable                                                                     | 1. Mortality.<br>2. HRQoL.<br>3. Complications. |
| 12<br>13<br>14<br>15<br>16<br>17<br>18<br>19<br>20<br>21<br>22<br>23<br>24<br>25<br>26<br>27                         | People with uncomplicated hepatic hydatid cysts                                           | Percutaneous needle aspiration, injection, and re-aspiration with benzimidazole | Percutaneous needle aspiration, injection, and re-aspiration without benzimidazole | 1. Mortality.<br>2. HRQoL.<br>3. Complications. |
| 28<br>29<br>30<br>31<br>32<br>33<br>34                                                                               | People with gallbladder cancer                                                            | Chemotherapy                                                                    | Not applicable                                                                     | 1. Mortality.<br>2. HRQoL.<br>3. Complications. |
| 35<br>36<br>37<br>38<br>39<br>40                                                                                     | People with acute or acute-on-chronic liver failure                                       | Granulocyte-colony stimulating factor                                           | No intervention/other interventions                                                | 1. Mortality.<br>2. HRQoL.<br>3. Complications. |
| 41<br>42<br>43<br>44<br>45<br>46<br>47<br>48<br>49<br>50<br>51<br>52<br>53<br>54<br>55<br>56<br>57<br>58<br>59<br>60 | People with common bile duct stones                                                       | Early laparoscopic cholecystectomy following endoscopic sphincterotomy          | Delayed laparoscopic cholecystectomy following endoscopic sphincterotomy           | 1. Mortality.<br>2. HRQoL.<br>3. Complications. |

|                                                                                                                                                                                                                                                                                                                                                             |                                                    |                                                |                                                 |                                                 |
|-------------------------------------------------------------------------------------------------------------------------------------------------------------------------------------------------------------------------------------------------------------------------------------------------------------------------------------------------------------|----------------------------------------------------|------------------------------------------------|-------------------------------------------------|-------------------------------------------------|
| 1<br>2<br>3<br>4<br>5<br>6<br>7<br>8<br>9<br>10<br>11<br>12<br>13<br>14<br>15<br>16<br>17<br>18<br>19<br>20<br>21<br>22<br>23<br>24<br>25<br>26<br>27<br>28<br>29<br>30<br>31<br>32<br>33<br>34<br>35<br>36<br>37<br>38<br>39<br>40<br>41<br>42<br>43<br>44<br>45<br>46<br>47<br>48<br>49<br>50<br>51<br>52<br>53<br>54<br>55<br>56<br>57<br>58<br>59<br>60 | People with gallstones and common-bile duct stones | Model of service delivery                      | Not applicable                                  | 1. Mortality.<br>2. HRQoL.<br>3. Complications. |
| People undergoing cholecystectomy                                                                                                                                                                                                                                                                                                                           | Routine intraoperative cholangiography             | selective cholangiography                      | 1. Mortality.<br>2. HRQoL.<br>3. Complications. |                                                 |
| People with gallstone pancreatitis                                                                                                                                                                                                                                                                                                                          | Early cholecystectomy                              | Delayed cholecystectomy                        | 1. Mortality.<br>2. HRQoL.<br>3. Complications. |                                                 |
| People at risk of gallstones                                                                                                                                                                                                                                                                                                                                | Non-pharmacological interventions                  | Not applicable                                 | 1. Mortality.<br>2. HRQoL.<br>3. Complications. |                                                 |
| People with biliary obstruction due to cholangiocarcinoma                                                                                                                                                                                                                                                                                                   | Endoscopic bipolar radiofrequency ablation         | Other interventions                            | 1. Mortality.<br>2. HRQoL.<br>3. Complications. |                                                 |
| People with colorectal liver metastases                                                                                                                                                                                                                                                                                                                     | Radiofrequency ablation                            | Other interventions                            | 1. Mortality.<br>2. HRQoL.<br>3. Complications. |                                                 |
| People with suspected bile leak                                                                                                                                                                                                                                                                                                                             | Magnetic resonance cholangiopancreatography        | Endoscopic retrograde cholangiopancreatography | 1. Mortality.<br>2. HRQoL.<br>3. Complications. |                                                 |
| People with cholangitis                                                                                                                                                                                                                                                                                                                                     | Antibiotics                                        | Not applicable                                 | 1. Mortality.<br>2. HRQoL.<br>3. Complications. |                                                 |

|                                                                |                                                     |                                                               |                |                                                 |
|----------------------------------------------------------------|-----------------------------------------------------|---------------------------------------------------------------|----------------|-------------------------------------------------|
| 1<br>2<br>3<br>4<br>5<br>6<br>7<br>8<br>9                      | People with suspected focal liver lesions           | Imaging modalities to distinguish focal liver lesions         | Not applicable | 1. Mortality.<br>2. HRQoL.<br>3. Complications. |
| 10<br>11<br>12<br>13<br>14<br>15<br>16                         | People with liver cancer who have undergone surgery | Optimal follow-up regimen to detect early recurrence          | Not applicable | 1. Mortality.<br>2. HRQoL.<br>3. Complications. |
| 17<br>18<br>19<br>20<br>21<br>22<br>23                         | People undergoing laparoscopic cholecystectomy      | Evidence-based pain relief protocol                           | Standard care  | 1. Mortality.<br>2. HRQoL.<br>3. Complications. |
| 24<br>25<br>26<br>27<br>28<br>29                               | People undergoing liver and bile duct resection     | Evidence-based pain relief protocol                           | Standard care  | 1. Mortality.<br>2. HRQoL.<br>3. Complications. |
| 30<br>31<br>32<br>33<br>34<br>35<br>36                         | People with suspected gallbladder polyp             | Imaging modalities to confirm diagnosis of gallbladder polyp  | Not applicable | 1. Mortality.<br>2. HRQoL.<br>3. Complications. |
| 37<br>38<br>39<br>40<br>41<br>42<br>43                         | People with gallbladder polyp                       | Imaging modalities to distinguish nature of gallbladder polyp | Not applicable | 1. Mortality.<br>2. HRQoL.<br>3. Complications. |
| 44<br>45<br>46<br>47<br>48<br>49                               | People with suspected gallstones                    | Methods to confirm diagnosis of gallstone                     | Not applicable | 1. Mortality.<br>2. HRQoL.<br>3. Complications. |
| 50<br>51<br>52<br>53<br>54<br>55<br>56<br>57<br>58<br>59<br>60 | People with suspected acute cholecystitis           | Methods to confirm diagnosis of acute cholecystitis           | Not applicable | 1. Mortality.<br>2. HRQoL.<br>3. Complications. |

|                                                                                                                                                                                                                                                                                                                                                             |                                                     |                                                  |                |                                                 |
|-------------------------------------------------------------------------------------------------------------------------------------------------------------------------------------------------------------------------------------------------------------------------------------------------------------------------------------------------------------|-----------------------------------------------------|--------------------------------------------------|----------------|-------------------------------------------------|
| 1<br>2<br>3<br>4<br>5<br>6<br>7<br>8<br>9<br>10<br>11<br>12<br>13<br>14<br>15<br>16<br>17<br>18<br>19<br>20<br>21<br>22<br>23<br>24<br>25<br>26<br>27<br>28<br>29<br>30<br>31<br>32<br>33<br>34<br>35<br>36<br>37<br>38<br>39<br>40<br>41<br>42<br>43<br>44<br>45<br>46<br>47<br>48<br>49<br>50<br>51<br>52<br>53<br>54<br>55<br>56<br>57<br>58<br>59<br>60 | People with suspected gallbladder dyskinesia        | Methods to confirm gallbladder dyskinesia        | Not applicable | 1. Mortality.<br>2. HRQoL.<br>3. Complications. |
|                                                                                                                                                                                                                                                                                                                                                             | People with suspected Sphincter of Oddi dysfunction | Methods to confirm Sphincter of Oddi dysfunction | Not applicable | 1. Mortality.<br>2. HRQoL.<br>3. Complications. |
|                                                                                                                                                                                                                                                                                                                                                             | People at risk of gallstones                        | Motivational interviewing for lifestyle changes  | standard care  | 1. Mortality.<br>2. HRQoL.<br>3. Complications. |
|                                                                                                                                                                                                                                                                                                                                                             | People with gallstones                              | Motivational interviewing for lifestyle changes  | standard care  | 1. Mortality.<br>2. HRQoL.<br>3. Complications. |
|                                                                                                                                                                                                                                                                                                                                                             | People at risk of NAFLD                             | Motivational interviewing for lifestyle changes  | standard care  | 1. Mortality.<br>2. HRQoL.<br>3. Complications. |
|                                                                                                                                                                                                                                                                                                                                                             | People with NAFLD                                   | Motivational interviewing for lifestyle changes  | standard care  | 1. Mortality.<br>2. HRQoL.<br>3. Complications. |
|                                                                                                                                                                                                                                                                                                                                                             | People undergoing liver resection for liver cancer  | Imaging modalities to confirm resectability      | Not applicable | 1. Mortality.<br>2. HRQoL.<br>3. Complications. |
|                                                                                                                                                                                                                                                                                                                                                             | People undergoing surgery for biliary tract cancer  | Imaging modalities to confirm resectability      | Not applicable | 1. Mortality.<br>2. HRQoL.<br>3. Complications. |

|                                                                                                                                                                                                                                                                                                                                                             |                                                               |                                             |                                                 |                                                 |
|-------------------------------------------------------------------------------------------------------------------------------------------------------------------------------------------------------------------------------------------------------------------------------------------------------------------------------------------------------------|---------------------------------------------------------------|---------------------------------------------|-------------------------------------------------|-------------------------------------------------|
| 1<br>2<br>3<br>4<br>5<br>6<br>7<br>8<br>9<br>10<br>11<br>12<br>13<br>14<br>15<br>16<br>17<br>18<br>19<br>20<br>21<br>22<br>23<br>24<br>25<br>26<br>27<br>28<br>29<br>30<br>31<br>32<br>33<br>34<br>35<br>36<br>37<br>38<br>39<br>40<br>41<br>42<br>43<br>44<br>45<br>46<br>47<br>48<br>49<br>50<br>51<br>52<br>53<br>54<br>55<br>56<br>57<br>58<br>59<br>60 | People undergoing liver resection                             | Imaging modalities to confirm resectability | Not applicable                                  | 1. Mortality.<br>2. HRQoL.<br>3. Complications. |
| People undergoing liver transplantation for hepatocellular carcinoma                                                                                                                                                                                                                                                                                        | Imaging modalities to confirm that cancer is limited to liver | Not applicable                              | 1. Mortality.<br>2. HRQoL.<br>3. Complications. |                                                 |
| People undergoing liver transplantation for hepatocellular carcinoma                                                                                                                                                                                                                                                                                        | Bridging ablative therapies                                   | Standard care                               | 1. Mortality.<br>2. HRQoL.<br>3. Complications. |                                                 |
| People undergoing liver transplantation for hepatocellular carcinoma                                                                                                                                                                                                                                                                                        | Goal-directed therapy                                         | Standard care                               | 1. Mortality.<br>2. HRQoL.<br>3. Complications. |                                                 |
| People with gallstones                                                                                                                                                                                                                                                                                                                                      | Direct access surgery (without seeing a specialist)           | Standard care                               | 1. Mortality.<br>2. HRQoL.<br>3. Complications. |                                                 |
| People with benign liver and gallbladder conditions                                                                                                                                                                                                                                                                                                         | Nurse-led care                                                | Standard care                               | 1. Mortality.<br>2. HRQoL.<br>3. Complications. |                                                 |
| People with sphincter of oddi dysfunction                                                                                                                                                                                                                                                                                                                   | Pharmacological interventions                                 | Standard care                               | 1. Mortality.<br>2. HRQoL.<br>3. Complications. |                                                 |
| People with sphincter of oddi dysfunction                                                                                                                                                                                                                                                                                                                   | Psychological counselling                                     | Standard care                               | 1. Mortality.<br>2. HRQoL.<br>3. Complications. |                                                 |

|                                                                |                                             |                                                            |                |                                                                     |
|----------------------------------------------------------------|---------------------------------------------|------------------------------------------------------------|----------------|---------------------------------------------------------------------|
| 1<br>2<br>3<br>4<br>5<br>6<br>7<br>8<br>9                      | People with biliary stricture               | Different diagnostic tests                                 | Not applicable | 1. Mortality.<br>2. HRQoL.<br>3. Complications.                     |
| 10<br>11<br>12<br>13<br>14<br>15<br>16                         | People with gallstones                      | Routine magnetic resonance cholangio pancreatography       | Standard care  | 1. Mortality.<br>2. HRQoL.<br>3. Complications.                     |
| 17<br>18<br>19<br>20<br>21<br>22<br>23<br>24<br>25<br>26<br>27 | People with liver and gallbladder disorders | Methods to improve understanding of evidence               | Not applicable | 1. Improved knowledge.<br>2. Better involvement in decision making. |
| 28<br>29<br>30<br>31<br>32<br>33<br>34                         | People undergoing liver transplantation     | Routine fat-assessment in donor livers                     | Standard care  | 1. Mortality.<br>2. HRQoL.<br>3. Complications.                     |
| 35<br>36<br>37<br>38<br>39<br>40                               | People with NAFLD and obesity               | Routine anti-obesity surgery                               | Standard care  | 1. Mortality.<br>2. HRQoL.<br>3. Complications.                     |
| 41<br>42<br>43<br>44<br>45<br>46<br>47<br>48<br>49             | People with severe polycystic liver disease | Pharmacological interventions to improve functional volume | Standard care  | 1. Mortality.<br>2. HRQoL.<br>3. Complications.                     |
| 50<br>51<br>52<br>53<br>54<br>55<br>56<br>57<br>58<br>59<br>60 | People with liver disease                   | Interventions to achieve palliation                        | Not applicable | 1. Palliation.                                                      |

|                                                    |                                                                                  |                                                           |                 |                                                                   |
|----------------------------------------------------|----------------------------------------------------------------------------------|-----------------------------------------------------------|-----------------|-------------------------------------------------------------------|
| 1<br>2<br>3<br>4<br>5<br>6<br>7<br>8<br>9          | People with liver disease                                                        | Interventions to achieve symptom control                  | Not applicable  | Symptom control                                                   |
| 10<br>11<br>12<br>13                               | People with liver disease                                                        | Interventions to improve quality of life                  | Not applicable  | Quality of life                                                   |
| 14<br>15<br>16<br>17<br>18<br>19<br>20<br>21<br>22 | Healthcare professionals dealing with people with primary sclerosing cholangitis | Education of healthcare professionals about liver disease | Standard care   | 1. Early recognition.<br>2. Appropriate treatment.                |
| 23<br>24<br>25<br>26<br>27<br>28<br>29             | People with Crohn's disease                                                      | Methods for screening for primary sclerosing cholangitis  | Not applicable  | Diagnosis of primary sclerosing cholangitis                       |
| 30<br>31<br>32<br>33<br>34                         | People with NAFLD                                                                | Patient education                                         | Standard care   | 1. Greater knowledge.                                             |
| 35<br>36<br>37<br>38<br>39<br>40<br>41<br>42<br>43 | Healthcare professionals dealing with people with polycystic liver disease       | Education of healthcare professionals about liver disease | Standard care   | 1. Early recognition.<br>2. Appropriate treatment.                |
| 44<br>45<br>46<br>47<br>48<br>49<br>50<br>51<br>52 | People with polycystic liver disease                                             | Early liver transplantation                               | Standard care   | 1. Quality of life.<br>2. Reducing symptoms.<br>3. Reducing pain. |
| 53<br>54<br>55<br>56<br>57<br>58<br>59<br>60       | People with autoimmune hepatitis                                                 | Interventions that affect T cells                         | No intervention | 1. Cure.<br>2. Improve quality of life                            |



|                                                                                              |                                         |                                                         |                |                                                                                                                  |
|----------------------------------------------------------------------------------------------|-----------------------------------------|---------------------------------------------------------|----------------|------------------------------------------------------------------------------------------------------------------|
| 1<br>2<br>3<br>4<br>5<br>6<br>7                                                              | People at risk of liver disease         | Screening                                               | Not applicable | Early diagnosis and treatment                                                                                    |
| 8<br>9<br>10<br>11                                                                           | People with polycystic liver disease    | Monitoring polycystic liver disease                     | Not applicable |                                                                                                                  |
| 12<br>13<br>14<br>15<br>16                                                                   | People with polycystic kidney disease   | Diagnosis polycystic liver disease                      | Not applicable |                                                                                                                  |
| 17<br>18<br>19<br>20<br>21<br>22                                                             | People with liver disease               | Methods to improve early appropriate treatment          | Not applicable | Early diagnosis and treatment                                                                                    |
| 23<br>24<br>25<br>26<br>27<br>28<br>29                                                       | People with polycystic kidney disease   | Methods to prevent symptomatic polycystic liver disease | Not applicable | 1. Quality of life.<br>2. Liver function.                                                                        |
| 30<br>31<br>32<br>33<br>34<br>35<br>36<br>37<br>38<br>39<br>40<br>41<br>42<br>43<br>44<br>45 | People undergoing liver transplantation | Various treatments                                      | Not applicable | 1. Survival<br>2. Complications<br>3. QoL<br>4. Hospital stay<br>5. Return to work<br>6. Improvement of symptoms |
| 46<br>47<br>48<br>49<br>50<br>51<br>52<br>53<br>54<br>55<br>56<br>57<br>58<br>59<br>60       | People with polycystic liver disease    | Diet (specifically soy proteins which contain oestrogen | Standard diet  | 1. Decrease size of cyst or preventing cysts to enlarge.<br>2. Decrease symptoms                                 |

|                                                                                                          |                                                                                     |                                                                    |                     |                                                                                                     |
|----------------------------------------------------------------------------------------------------------|-------------------------------------------------------------------------------------|--------------------------------------------------------------------|---------------------|-----------------------------------------------------------------------------------------------------|
| 1<br>2<br>3<br>4<br>5<br>6<br>7<br>8<br>9<br>10<br>11                                                    | People with NAFLD                                                                   | Various treatments                                                 | Not applicable      | 1. Impact on health<br>(no further details)<br>2. Progression to<br>liver failure                   |
| 12<br>13<br>14<br>15<br>16                                                                               | People with suspected<br>NAFLD                                                      | Diagnosis                                                          | Not applicable      | 1. Early diagnosis                                                                                  |
| 17<br>18<br>19<br>20<br>21<br>22<br>23<br>24<br>25<br>26<br>27<br>28<br>29<br>30<br>31<br>32<br>33<br>34 | People with gallstones                                                              | Various treatments                                                 | Not applicable      | 1. Impact on health<br>(no further details)                                                         |
| 35<br>36<br>37<br>38<br>39<br>40<br>41<br>42<br>43                                                       | People with polycystic liver<br>disease                                             | Genetic treatments                                                 | Standard<br>therapy | 1. Reduce symptoms.<br>2. Decrease<br>occurrence and size<br>of cysts.<br>3. Increased<br>longevity |
| 44<br>45<br>46<br>47<br>48<br>49<br>50<br>51<br>52<br>53<br>54<br>55<br>56<br>57<br>58<br>59<br>60       | Healthcare professionals<br>dealing with people with<br>primary biliary cholangitis | Education of<br>healthcare<br>professionals about<br>liver disease | Standard care       | 1. Early recognition.<br>2. Appropriate<br>treatment.                                               |
|                                                                                                          | People undergoing<br>treatment for ulcerative<br>colitis                            | Various treatments                                                 | Not applicable      | 1. Adverse events<br>related to liver                                                               |
|                                                                                                          | People with<br>cholangiocarcinoma                                                   | Liver transplantation                                              | Standard<br>therapy | 1. Survival<br>2. Complications<br>3. QoL                                                           |

|                                              |                                                                                    |                       |                                                                                    |
|----------------------------------------------|------------------------------------------------------------------------------------|-----------------------|------------------------------------------------------------------------------------|
|                                              |                                                                                    |                       | 4. Hospital stay<br>5. Return to work                                              |
| People undergoing liver transplantation      | Machine perfusion of donor organ                                                   | Cold storage          | 1. Survival<br>2. Complications<br>3. QoL<br>4. Hospital stay<br>5. Return to work |
| People with liver cancer                     | Novel treatments (irreversible electroporation, high intensity focused ultrasound) |                       | 1. Survival<br>2. Complications<br>3. QoL<br>4. Hospital stay<br>5. Return to work |
| People with hepatocellular carcinoma         | Liver resection                                                                    | Liver transplantation | 1. Survival<br>2. Complications<br>3. QoL<br>4. Hospital stay<br>5. Return to work |
| People with colorectal liver metastases      | Ablation                                                                           | Surgery               | 1. Survival<br>2. Complications<br>3. QoL<br>4. Hospital stay<br>5. Return to work |
| People with liver disease undergoing surgery | Ischaemic preconditioning                                                          | No IPC                | 1. Survival<br>2. Complications<br>3. QoL                                          |

|                                                     |                                       |                             |                                                                                                                                                  |
|-----------------------------------------------------|---------------------------------------|-----------------------------|--------------------------------------------------------------------------------------------------------------------------------------------------|
|                                                     |                                       |                             | 4. Hospital stay<br>5. Return to work                                                                                                            |
| People with liver disease<br>undergoing surgery     | Remote ischaemic<br>preconditioning   | No RIPC                     | 1. Survival<br>2. Complications<br>3. QoL<br>4. Hospital stay<br>5. Return to work                                                               |
| People with liver disease<br>undergoing surgery     | Goal-directed therapy                 | standard fluid<br>treatment | 1. Survival<br>2. Complications<br>3. QoL<br>4. Hospital stay<br>5. Return to work                                                               |
| People with compensated<br>liver cirrhosis          | Treatments (in<br>particular statins) | Other<br>interventions      | 1. Decompensation<br>2. Survival<br>3. Side effects<br>4. Quality of life.                                                                       |
| People with chronic liver<br>disease/ liver failure | Stem cell therapy                     | Standard<br>therapy         | 1. Graft and patient<br>survival<br>2. QoL.<br>3. Morbidity<br>compared to<br>conventional<br>transplantation<br>4. Patient reported<br>outcomes |

|                                           |                                                                                        |                                     |                |                           |
|-------------------------------------------|----------------------------------------------------------------------------------------|-------------------------------------|----------------|---------------------------|
| 1<br>2<br>3<br>4<br>5<br>6<br>7<br>8<br>9 | People with Wilson's disease<br>(and other rare non-alcohol<br>liver related diseases) | Various treatments                  | Not applicable | Not stated                |
| 10<br>11<br>12<br>13<br>14                | People with suspected<br>autoimmune hepatitis                                          | Diagnosis of<br>autoimmune diseases | Not applicable | 1. Costs of<br>management |

## Appendix 2 List of unanswered research questions ('uncertainties') prioritised during the interim prioritisation

1. What are the best treatments that cure or delay the progression (worsening) of primary sclerosing cholangitis (PSC)?
2. Should all people above 40 years of age or those considered to be at risk of liver disease (because of family history of liver disease or because of their lifestyle) be tested for the presence of liver disease to identify liver diseases at an early stage?
3. Should people with primary sclerosing cholangitis (PSC) undergo screening (tested routinely) for cancer?
4. Are there any treatments that reverse the liver damage in primary sclerosing cholangitis (PSC)?
5. What are the best treatments that cure or delay the progression (worsening) of non-alcohol-related fatty liver disease (NAFLD)?
6. What are the best symptomatic treatments for itching in people with primary sclerosing cholangitis (PSC)?
7. Are there alternatives to invasive assessment of oesophageal varices in people with chronic liver disease?

- 1  
2  
3 8. Does vitamin D supplementation (adding Vitamin D in food or providing it in tablet form)  
4  
5 increase the lifespan, health-related quality of life, and decrease complications in people  
6  
7 with liver disease?  
8  
9
- 10 9. Should new methods to improve the understanding of evidence be developed for people  
11  
12 with liver and gallbladder diseases?  
13
- 14 10. What is the best treatment for people with early or very early hepatocellular carcinoma  
15  
16 (HCC)?  
17
- 18 11. Should the methods used to assess nutrition of patients in liver disease be standardised?  
19
- 20 12. Does dieting improve liver function and decrease the requirement for liver transplantation in  
21  
22 obese people?  
23
- 24 13. Should general public be educated about non-alcohol-related fatty liver disease (NAFLD)  
25  
26 with an aim to reduce the numbers of those that have it?  
27
- 28 14. What are the best symptomatic treatments for itching in people with chronic liver diseases  
29  
30 other than primary sclerosing cholangitis (PSC) and primary biliary cholangitis (PBC)?  
31  
32
- 33 15. Do treatments targeted against deformation of bile duct (biliary stricture or narrowing of  
34  
35 bile duct due to the illness) work better than other treatments in people with primary  
36  
37 sclerosing cholangitis (PSC)?  
38
- 39 16. What are the treatments available to decrease weight in overweight people with non-  
40  
41 alcohol-related fatty liver disease (NAFLD)?  
42
- 43 17. What are the best treatments that cure or delay the progression (worsening) of non-alcohol  
44  
45 related steatohepatitis (NASH)?  
46  
47
- 48 18. Do statins (or other treatments) delay liver failure in people with advanced liver disease?  
49
- 50 19. What are the best treatments that provide temporary symptom relief in people with  
51  
52 advanced liver disease?  
53
- 54 20. Which is the most suitable antibiotic (or combination of antibiotics) in people with  
55  
56 cholangitis (biliary infection)?  
57  
58  
59  
60

- 1  
2  
3 21. What are the best treatments that cure or delay the progression (worsening) of autoimmune  
4 hepatitis (AIH)?  
5  
6
- 7  
8 22. Are there any methods other than liver biopsy (obtaining a piece of liver, usually using a  
9  
10  
11  
12  
13  
14  
15  
16  
17  
18  
19  
20  
21  
22  
23  
24  
25  
26  
27  
28  
29  
30  
31  
32  
33  
34  
35  
36  
37  
38  
39  
40  
41  
42  
43  
44  
45  
46  
47  
48  
49  
50  
51  
52  
53  
54  
55  
56  
57  
58  
59  
60
23. What are the best nutritional interventions in people undergoing liver transplantation?
24. What are the best symptomatic treatments for fatigue (tiredness), joint pain, and other symptoms in people with people with autoimmune hepatitis (AIH)?
25. Prior to liver transplantation, is it better to transport the donor liver using a machine which pumps blood or preservation solution through the liver (machine perfusion) or is it better to transport it in the standard way of transporting it immersed in cold preservation solution (cold storage)?
26. What are the best treatments that cure or delay the progression (worsening) of chronic hepatitis C virus (HCV) infection?
27. Does education of people with liver disease about the natural course and treatment of liver disease improve the patient knowledge, patient responsibility, and decrease hospital visits?
28. What are the best treatments that cure or delay the progression (worsening) of primary biliary cholangitis (PBC)?
29. Is nurse-led care as effective or better than doctor-led care for non-alcohol related fatty liver disease (NAFLD)?
30. Is treatment targeted against deformation of bile duct (biliary stricture or narrowing of bile duct due to cancer) better than standard treatment for people with bile duct cancer?
31. Is surgery (in the form of removal of gallbladder) required in people with gallstones?
32. Should people with non-alcohol-related fatty liver disease (NAFLD) and non-alcohol-related steatohepatitis (NASH) receive additional education about the condition?
33. What is the best immunosuppressive regimen in adults undergoing liver transplantation?

- 1  
2  
3 34. Is endoscopic ultrasound (EUS) (using a ultrasound attached to the end of an endoscope) or  
4  
5 magnetic resonance cholangiopancreatography (MRCP, a form of MRI scan) better in the  
6  
7 diagnosis of common bile duct (CBD) stones?  
8  
9  
10 35. How can we improve compliance to treatment (adherence to treatment or the degree to  
11  
12 which a patient correctly follows medical advice) in people with liver disease?  
13  
14 36. What are the best symptomatic treatments for relief of ulcerative colitis (UC) in people with  
15  
16 primary sclerosing cholangitis (PSC) who have undergone liver transplantation?  
17  
18 37. What are the best symptomatic treatments for itching and fatigue (tiredness) in people with  
19  
20 primary biliary cholangitis (PBC)?  
21  
22  
23 38. Does education of people with asymptomatic (absence of symptoms) liver disease result in  
24  
25 change of life style and cure/delay the progression (worsening) of liver disease?  
26  
27  
28 39. What are the best treatments that are available for the treatment of pregnant women with  
29  
30 cholestasis (condition where bile flow from the liver is obstructed)?  
31  
32  
33 40. Is transarterial chemoembolisation (TACE) or transarterial embolisation (TAE) (blocking the  
34  
35 blood supply to cancer with or without chemotherapy drugs) effective in the treatment of  
36  
37 people with liver metastases?  
38  
39 41. Should people with liver metastases (cancer spread to the liver) from neuroendocrine cancer  
40  
41 (a form of cancer that arises from cells that secrete hormones and nervous system) undergo  
42  
43 liver resection?  
44  
45  
46 42. What are the best methods available to decrease blood loss during liver resection?  
47  
48  
49 43. What are the best treatments that cure or delay the progression (worsening) of chronic  
50  
51 hepatitis B virus (HBV) infection?  
52  
53  
54 44. What are the best treatments for people with polycystic liver disease?  
55  
56  
57 45. Should the healthcare professionals dealing with childhood liver diseases be provided  
58  
59 additional education about childhood liver diseases compared to standard education where  
60  
60 childhood diseases are learnt as part of overall education?



- 1  
2  
3 46. What is the best immunosuppressive regimen in children undergoing liver transplantation?  
4  
5  
6 47. Should blood vessels supplying the liver be temporarily blocked in people undergoing liver  
7  
8 resection? If so, what is the best way of performing this?  
9  
10 48. What is the best treatment that should be given to people who undergo liver transplantation  
11  
12 for chronic hepatitis B virus (HBV) infection to prevent reinfection with chronic hepatitis B  
13  
14 virus (HBV) infection?  
15  
16  
17  
18  
19  
20  
21  
22  
23  
24  
25  
26  
27  
28  
29  
30  
31  
32  
33  
34  
35  
36  
37  
38  
39  
40  
41  
42  
43  
44  
45  
46  
47  
48  
49  
50  
51  
52  
53  
54  
55  
56  
57  
58  
59  
60

For peer review only

Appendix 3 Next step to address the top 10 uncertainty based on current best evidence (detailed)

| Treatment uncertainty<br>(Research question)                                                   | High-quality<br>systematic review <sup>a</sup> | Research<br>recommendations of<br>systematic review                                                                                                                                                             | RCTs not included in<br>the systematic<br>review <sup>a,b,c</sup>                                                    | Patient-oriented<br>outcomes assessed in<br>trials not included in<br>the systematic review <sup>d</sup> | Next step                                                                                                                                 |
|------------------------------------------------------------------------------------------------|------------------------------------------------|-----------------------------------------------------------------------------------------------------------------------------------------------------------------------------------------------------------------|----------------------------------------------------------------------------------------------------------------------|----------------------------------------------------------------------------------------------------------|-------------------------------------------------------------------------------------------------------------------------------------------|
| What is the best treatment for people with early or very early hepatocellular carcinoma (HCC)? | [1]                                            | High-quality RCTs designed to assess clinically important differences in all-cause mortality and health-related quality of life, and having an adequate follow-up period (approximately five years) are needed. | NCT02169765<br>NCT02704130<br>NCT02728193<br>NCT02243384<br>NCT00844454<br>NCT01918683<br>NCT01570075<br>NCT01351194 | Survival (7 trials),<br>recurrence (5 trials),<br>morbidity (3 trials)                                   | High-quality RCTs of interventions not covered in ongoing trials and comparison of health-related quality (HRQoL) in different treatments |

|                                                                                                                                                                                                                                                                                                                                  |                                                          |                                                                                                                                                                                                                                                                     |                                                                                                                                                    |                                                                           |                                                                                                |
|----------------------------------------------------------------------------------------------------------------------------------------------------------------------------------------------------------------------------------------------------------------------------------------------------------------------------------|----------------------------------------------------------|---------------------------------------------------------------------------------------------------------------------------------------------------------------------------------------------------------------------------------------------------------------------|----------------------------------------------------------------------------------------------------------------------------------------------------|---------------------------------------------------------------------------|------------------------------------------------------------------------------------------------|
| <p>1<br/>2<br/>3<br/>4<br/>5<br/>6<br/>7<br/>8<br/>9<br/>10<br/>11<br/>12<br/>13<br/>14<br/>15<br/>16<br/>17<br/>18<br/>19<br/>20<br/>21<br/>22<br/>23<br/>24<br/>25<br/>26<br/>27<br/>28<br/>29</p> <p>What are the best treatments that cure or delay the progression (worsening) of primary sclerosing cholangitis (PSC)?</p> | <p>[2]</p>                                               | <p>An urgent need exists to identify an effective medical treatment for primary sclerosing cholangitis through well-designed RCTs with adequate follow-up that aim to identify differences in outcomes important to people with primary sclerosing cholangitis.</p> | <p>NCT03394781<br/>NCT02605213<br/>NCT02943460<br/>NCT02704364<br/>NCT01688024<br/>NCT02177136<br/>NCT01672853<br/>NCT03035058<br/>NCT03333928</p> | <p>None of the trials include survival, HRQoL as outcomes<sup>e</sup></p> | <p>High-quality RCTs with clinical outcomes (survival, HRQoL)</p>                              |
| <p>30<br/>31<br/>32<br/>33<br/>34<br/>35<br/>36<br/>37<br/>38<br/>39<br/>40<br/>41<br/>42<br/>43<br/>44<br/>45<br/>46</p> <p>What are the best treatments that cure or delay the progression (worsening) of non-</p>                                                                                                             | <p>[3] (includes only pharmacological interventions)</p> | <p>Further well-designed randomised clinical trials with sufficiently</p>                                                                                                                                                                                           | <p>More than 10 published trials on lifestyle interventions and more than 20 trials</p>                                                            | <p>Lifestyle interventions and nutritional supplementation</p>            | <p>High-quality systematic reviews on lifestyle interventions (one review) and nutritional</p> |

1  
2  
3  
4  
5  
6  
7  
8  
9  
10  
11  
12  
13  
14  
15  
16  
17  
18  
19  
20  
21  
22  
23  
24  
25  
26  
27  
28  
29  
30  
31  
32  
33  
34  
35  
36  
37  
38  
39  
40  
41  
42  
43  
44  
45  
46

|                                                     |  |                                          |                                                                                                                                                                                                                                                                                               |                                                                                                                                                                                                                                                                                                       |                                                                                                                                                                  |
|-----------------------------------------------------|--|------------------------------------------|-----------------------------------------------------------------------------------------------------------------------------------------------------------------------------------------------------------------------------------------------------------------------------------------------|-------------------------------------------------------------------------------------------------------------------------------------------------------------------------------------------------------------------------------------------------------------------------------------------------------|------------------------------------------------------------------------------------------------------------------------------------------------------------------|
| <p>alcohol-related fatty liver disease (NAFLD)?</p> |  | <p>large sample sizes are necessary.</p> | <p>on nutritional supplementation with no recent high-quality systematic reviews<br/><u>Pharmacological interventions</u><br/>NCT02605616<br/>NCT01002547<br/>NCT02927314<br/>NCT03291249<br/>NCT03166735<br/>NCT03486899<br/>NCT03061721<br/>NCT02784444<br/>NCT02077374<br/>NCT03486912</p> | <p>Not applicable as there are no high quality systematic reviews<br/><u>Pharmacological interventions</u><br/>Health-related quality of life (2 trials), resolution of fatty liver disease (11 trials), mortality (2 trials), cirrhosis (2 trials), cardiovascular events (2 trials)<sup>e</sup></p> | <p>supplementation to cure or delay the progression of NAFLD and high-quality RCTs on pharmacological interventions with clinical outcomes (survival, HRQoL)</p> |
|-----------------------------------------------------|--|------------------------------------------|-----------------------------------------------------------------------------------------------------------------------------------------------------------------------------------------------------------------------------------------------------------------------------------------------|-------------------------------------------------------------------------------------------------------------------------------------------------------------------------------------------------------------------------------------------------------------------------------------------------------|------------------------------------------------------------------------------------------------------------------------------------------------------------------|

1  
2  
3  
4  
5  
6  
7  
8  
9  
10  
11  
12  
13  
14  
15  
16  
17  
18  
19  
20  
21  
22  
23  
24  
25  
26  
27  
28  
29  
30  
31  
32  
33  
34  
35  
36  
37  
38  
39  
40  
41  
42  
43  
44  
45  
46

|  |  |  |             |  |  |
|--|--|--|-------------|--|--|
|  |  |  | NCT02854605 |  |  |
|  |  |  | NCT01963845 |  |  |
|  |  |  | NCT03437720 |  |  |
|  |  |  | NCT02684591 |  |  |
|  |  |  | NCT02787304 |  |  |
|  |  |  | NCT02466516 |  |  |
|  |  |  | NCT02633956 |  |  |
|  |  |  | NCT03008070 |  |  |
|  |  |  | NCT03205150 |  |  |
|  |  |  | NCT02923154 |  |  |
|  |  |  | NCT02913105 |  |  |
|  |  |  | NCT01899859 |  |  |
|  |  |  | NCT02548351 |  |  |
|  |  |  | NCT03053063 |  |  |
|  |  |  | NCT03053050 |  |  |
|  |  |  | NCT02413372 |  |  |

1  
2  
3  
4  
5  
6  
7  
8  
9  
10  
11  
12  
13  
14  
15  
16  
17  
18  
19  
20  
21  
22  
23  
24  
25  
26  
27  
28  
29  
30  
31  
32  
33  
34  
35  
36  
37  
38  
39  
40  
41  
42  
43  
44  
45  
46

|  |  |  |             |  |  |
|--|--|--|-------------|--|--|
|  |  |  | NCT02443116 |  |  |
|  |  |  | NCT01464801 |  |  |
|  |  |  | NCT03449446 |  |  |
|  |  |  | NCT02912260 |  |  |
|  |  |  | NCT02856555 |  |  |
|  |  |  | NCT02704403 |  |  |
|  |  |  | NCT01617772 |  |  |
|  |  |  | NCT02217475 |  |  |
|  |  |  | NCT01406704 |  |  |
|  |  |  | NCT03248882 |  |  |
|  |  |  | NCT01051219 |  |  |
|  |  |  | NCT02316717 |  |  |
|  |  |  | NCT02970942 |  |  |
|  |  |  | NCT03439254 |  |  |
|  |  |  | NCT02574325 |  |  |
|  |  |  | NCT01703260 |  |  |

|                                                                                                                                                                                                                                                                                                                                                                                                                           |                                                        |                                                                                                                                                                                                                                                                                                      |                                                                                                                                                                                                        |                                                                                                                                                                                                                                                                                 |                                                                                                                                                                                                |
|---------------------------------------------------------------------------------------------------------------------------------------------------------------------------------------------------------------------------------------------------------------------------------------------------------------------------------------------------------------------------------------------------------------------------|--------------------------------------------------------|------------------------------------------------------------------------------------------------------------------------------------------------------------------------------------------------------------------------------------------------------------------------------------------------------|--------------------------------------------------------------------------------------------------------------------------------------------------------------------------------------------------------|---------------------------------------------------------------------------------------------------------------------------------------------------------------------------------------------------------------------------------------------------------------------------------|------------------------------------------------------------------------------------------------------------------------------------------------------------------------------------------------|
|                                                                                                                                                                                                                                                                                                                                                                                                                           |                                                        |                                                                                                                                                                                                                                                                                                      | NCT01260246                                                                                                                                                                                            |                                                                                                                                                                                                                                                                                 |                                                                                                                                                                                                |
|                                                                                                                                                                                                                                                                                                                                                                                                                           |                                                        |                                                                                                                                                                                                                                                                                                      | NCT02960204                                                                                                                                                                                            |                                                                                                                                                                                                                                                                                 |                                                                                                                                                                                                |
| <p>1<br/>2<br/>3<br/>4<br/>5<br/>6<br/>7<br/>8<br/>9<br/>10<br/>11<br/>12<br/>13<br/>14<br/>15<br/>16<br/>17<br/>18<br/>19<br/>20<br/>21<br/>22<br/>23<br/>24<br/>25<br/>26<br/>27<br/>28<br/>29<br/>30<br/>31<br/>32<br/>33<br/>34<br/>35<br/>36<br/>37<br/>38<br/>39<br/>40<br/>41<br/>42<br/>43<br/>44<br/>45<br/>46</p> <p>What is the best immunosuppressive regimen in adults undergoing liver transplantation?</p> | <p>[4] (covers only maintenance immunosuppression)</p> | <p>Future randomised clinical trials should be adequately powered; performed in people who are generally seen in the clinic rather than in highly selected participants; employ blinding; avoid postrandomisation dropouts or planned cross-overs; and use clinically important outcomes such as</p> | <p><u>Induction immunosuppression</u></p> <p>More than 20 published trials</p> <p><u>Maintenance immunosuppression</u></p> <p>NCT01998789</p> <p>NCT01230502</p> <p>NCT02909335</p> <p>NCT00286871</p> | <p><u>Induction immunosuppression</u></p> <p>Not applicable as there is no high quality systematic review</p> <p><u>Maintenance immunosuppression</u></p> <p>Graft survival (1 trial)</p> <p>Adverse events (1 trial)</p> <p>Hepatocellular carcinoma (1 trial)<sup>e</sup></p> | <p>High-quality systematic review on induction immunosuppressive regimen and high-quality RCTs on maintenance immunosuppression with important clinical outcomes (overall survival, HRQoL)</p> |

1  
2  
3  
4  
5  
6  
7  
8  
9  
10  
11  
12  
13  
14  
15  
16  
17  
18  
19  
20  
21  
22  
23  
24  
25  
26  
27  
28  
29  
30  
31  
32  
33  
34  
35  
36  
37  
38  
39  
40  
41  
42  
43  
44  
45  
46

|                                                                   |      |                                                                                                                                                                                                                                                                                                                                             |      |   |                                                       |
|-------------------------------------------------------------------|------|---------------------------------------------------------------------------------------------------------------------------------------------------------------------------------------------------------------------------------------------------------------------------------------------------------------------------------------------|------|---|-------------------------------------------------------|
|                                                                   |      | <p>mortality, graft loss,<br/>renal impairment,<br/>chronic kidney disease,<br/>and retransplantation.</p> <p>Such trials should use<br/>tacrolimus as one of<br/>the control groups.</p> <p>Moreover, such trials<br/>ought to be designed<br/>in such a way as to<br/>ensure low risk of bias<br/>and low risks of<br/>random errors.</p> |      |   |                                                       |
| Should general public<br>be educated about<br>non-alcohol-related | None | -                                                                                                                                                                                                                                                                                                                                           | None | - | High-quality RCTs on<br>education to prevent<br>NAFLD |



|                                                                                                                   |      |   |                                                                                                                                                                                                                               |                                                                                 |                                                                   |
|-------------------------------------------------------------------------------------------------------------------|------|---|-------------------------------------------------------------------------------------------------------------------------------------------------------------------------------------------------------------------------------|---------------------------------------------------------------------------------|-------------------------------------------------------------------|
| <p>fatty liver disease (NAFLD) with an aim to reduce the numbers of those that have it?</p>                       |      |   |                                                                                                                                                                                                                               |                                                                                 |                                                                   |
| <p>What are the best treatments that cure or delay the progression (worsening) of autoimmune hepatitis (AIH)?</p> | None | - | <p>[5-7]</p> <p>NCT02050646</p> <p>NCT02463331</p> <p>NCT00608894</p> <p>NCT02900443</p> <p>NCT02239562</p> <p>NCT01170351</p> <p>NCT03217422</p> <p>NCT01661842</p> <p>NCT00687180</p> <p>NCT01980745</p> <p>NCT02878863</p> | <p>Survival (1 trial), health-related quality of life (1 trial)<sup>e</sup></p> | <p>High quality RCTs with clinical outcomes (survival, HRQoL)</p> |

1  
2  
3  
4  
5  
6  
7  
8  
9  
10  
11  
12  
13  
14  
15  
16  
17  
18  
19  
20  
21  
22  
23  
24  
25  
26  
27  
28  
29  
30  
31  
32  
33  
34  
35  
36  
37  
38  
39  
40  
41  
42  
43  
44  
45  
46

|                                                                                                                                                                 |                                                                                                                                                      |   |                                                                         |                                                                                                   |                                                                                                                       |
|-----------------------------------------------------------------------------------------------------------------------------------------------------------------|------------------------------------------------------------------------------------------------------------------------------------------------------|---|-------------------------------------------------------------------------|---------------------------------------------------------------------------------------------------|-----------------------------------------------------------------------------------------------------------------------|
|                                                                                                                                                                 |                                                                                                                                                      |   | NCT02936596                                                             |                                                                                                   |                                                                                                                       |
| What are the best treatments that cure or delay the progression (worsening) of non-alcohol related steatohepatitis (NASH)?                                      | The evidence related to this question is covered under non-alcohol related fatty liver disease by performing a subgroup analysis of people with NASH |   |                                                                         |                                                                                                   |                                                                                                                       |
| Prior to liver transplantation, is it better to transport the donor liver using a machine which pumps blood or preservation solution through the liver (machine | None                                                                                                                                                 | - | NCT02775162<br>NCT03124641<br>NCT02940600<br>NCT02584283<br>NCT01317342 | Overall survival (4 trials), graft survival (5 trials), health-related quality of life (2 trials) | Await results of the RCTs (all expected to complete by the end of 2019) and perform a high quality systematic review. |

|                                                                                                                                                 |            |                                                                                                                                                                                            |                                                                                                                                                    |                                                                                             |                                                                   |
|-------------------------------------------------------------------------------------------------------------------------------------------------|------------|--------------------------------------------------------------------------------------------------------------------------------------------------------------------------------------------|----------------------------------------------------------------------------------------------------------------------------------------------------|---------------------------------------------------------------------------------------------|-------------------------------------------------------------------|
| <p>perfusion) or is it better to transport it in the standard way of transporting it immersed in cold preservation solution (cold storage)?</p> |            |                                                                                                                                                                                            |                                                                                                                                                    |                                                                                             |                                                                   |
| <p>What are the best treatments that cure or delay the progression (worsening) of primary biliary cholangitis (PBC)?</p>                        | <p>[8]</p> | <p>Further well-designed randomised clinical trials are necessary. Future randomised clinical trials ought to be adequately powered; performed in people who are generally seen in the</p> | <p>NCT02937012<br/>NCT01473524<br/>NCT02823353<br/>NCT02135536<br/>NCT01614405<br/>NCT02609048<br/>NCT00746486<br/>NCT02955602<br/>NCT03226067</p> | <p>Health-related quality of life (5 trials), relief of symptoms (5 trials)<sup>e</sup></p> | <p>High-quality RCTs with clinical outcomes (survival, HRQoL)</p> |

1  
2  
3  
4  
5  
6  
7  
8  
9  
10  
11  
12  
13  
14  
15  
16  
17  
18  
19  
20  
21  
22  
23  
24  
25  
26  
27  
28  
29  
30  
31  
32  
33  
34  
35  
36  
37  
38  
39  
40  
41  
42  
43  
44  
45  
46

|  |  |                          |             |  |  |
|--|--|--------------------------|-------------|--|--|
|  |  | clinic rather than in    | NCT03112681 |  |  |
|  |  | highly selected          | NCT01904058 |  |  |
|  |  | participants; employ     | NCT02943447 |  |  |
|  |  | blinding; avoid post-    | NCT03124108 |  |  |
|  |  | randomisation            | NCT03345589 |  |  |
|  |  | dropouts or planned      | NCT03092765 |  |  |
|  |  | cross-overs; should      | NCT03394924 |  |  |
|  |  | have sufficient follow-  | NCT02516605 |  |  |
|  |  | up period (e.g. five or  | NCT03253276 |  |  |
|  |  | 10 years or more); and   | NCT02965911 |  |  |
|  |  | use clinically important | NCT01899703 |  |  |
|  |  | outcomes such as         | NCT01654731 |  |  |
|  |  | mortality, health-       | NCT02308111 |  |  |
|  |  | related quality of life, | NCT00125281 |  |  |
|  |  | cirrhosis,               | NCT02701166 |  |  |
|  |  | decompensated            |             |  |  |

|                                                                                                        |                                                                                                                                                                                                                                                                                                                                                                       |                                                                                                                                                                 |  |  |  |
|--------------------------------------------------------------------------------------------------------|-----------------------------------------------------------------------------------------------------------------------------------------------------------------------------------------------------------------------------------------------------------------------------------------------------------------------------------------------------------------------|-----------------------------------------------------------------------------------------------------------------------------------------------------------------|--|--|--|
|                                                                                                        |                                                                                                                                                                                                                                                                                                                                                                       | <p>cirrhosis, and liver transplantation.</p> <p>Alternatively, very large groups of participants should be randomised to facilitate shorter trial duration.</p> |  |  |  |
| <p>Are there any treatments that reverse the liver damage in primary sclerosing cholangitis (PSC)?</p> | <p>The evidence related to this question is covered under treatments for primary sclerosing cholangitis. The systematic review did not include fibrosis as one of the outcomes. Nine of the trials included in the systematic review reported on fibrosis. Two of the trials not included in the systematic review (and listed above) reported on liver fibrosis.</p> |                                                                                                                                                                 |  |  |  |

a Numbers indicate the reference number.

b Ongoing trials, unpublished trials, or trials published since the search date for the systematic review when a high-quality systematic review based on randomised controlled trials exists. If no systematic reviews based on randomised controlled trials exist, these are either published trials or ongoing studies.

c NCT followed by a number indicates trial registration number

d This information is reported to find out whether the important patient-oriented outcomes are reported in the trials not covered by high-quality systematic reviews. This is to help with deciding whether new randomised controlled trials are necessary on the topic.

e The remaining trials reported treatment-related adverse events, composite outcomes and surrogate markers.

Appendix 4 Scores obtained by each question in the different Delphi rounds

| Questions <sup>a</sup> | Delphi 1:<br>Proportion<br>who rated<br>this question<br>as highly<br>important | Delphi 1:<br>Median<br>(IQR) | Delphi 2:<br>Proportion<br>who rated<br>this question<br>as highly<br>important | Delphi 2:<br>Median<br>(IQR) | Delphi 3:<br>Proportion<br>who rated<br>this question<br>as highly<br>important | Delphi 3:<br>Median<br>(IQR) | Consensus<br>reached in<br>Delphi 3? <sup>b</sup> |
|------------------------|---------------------------------------------------------------------------------|------------------------------|---------------------------------------------------------------------------------|------------------------------|---------------------------------------------------------------------------------|------------------------------|---------------------------------------------------|
|------------------------|---------------------------------------------------------------------------------|------------------------------|---------------------------------------------------------------------------------|------------------------------|---------------------------------------------------------------------------------|------------------------------|---------------------------------------------------|

|                                                                                                                                                                                                                                                                                      |                                        |                                                 |                                        |                                                                    |                                        |                                                 |     |
|--------------------------------------------------------------------------------------------------------------------------------------------------------------------------------------------------------------------------------------------------------------------------------------|----------------------------------------|-------------------------------------------------|----------------------------------------|--------------------------------------------------------------------|----------------------------------------|-------------------------------------------------|-----|
| 1.<br>What are the best treatments that cure<br>or delay the progression (worsening) of<br>primary sclerosing cholangitis (PSC)?                                                                                                                                                     | All: 78.8%<br>HCP: 80.0%<br>PCP: 76.9% | All: 8(7,9)<br>HCP: 8.5(7,9)<br>PCP: 8(6.5,9)   | All: 83.9%<br>HCP: 83.3%<br>PCP: 84.6% | All: 8(7,9)<br>HCP: 8(7,9)<br>PCP: 8(7,9)                          | All: 93.3%<br>HCP: 94.1%<br>PCP: 92.3% | All: 8(7,9)<br>HCP: 8(7,9)<br>PCP: 8(7,9)       | Yes |
| 2.<br>Should all people above 40 years of age<br>or those considered to be at risk of liver<br>disease (because of family history of liver<br>disease or because of their lifestyle) be<br>tested for the presence of liver disease to<br>identify liver diseases at an early stage? | All: 44.4%<br>HCP: 40.0%<br>PCP: 50.0% | All: 6(5,7)<br>HCP: 6(5,7)<br>PCP:<br>6(4,7.75) | All: 35.3%<br>HCP: 27.8%<br>PCP: 43.8% | All: 6(5,7)<br>HCP: 6(5,7)<br>PCP:<br>6(5,7.75)                    | All: 33.3%<br>HCP: 29.4%<br>PCP: 37.5% | All: 6(5,7)<br>HCP: 6(5,7)<br>PCP:<br>6(5,7.75) | No  |
| 3.<br>Should people with primary sclerosing<br>cholangitis (PSC) undergo screening<br>(tested routinely) for cancer?                                                                                                                                                                 | All: 46.9%<br>HCP: 40.0%<br>PCP: 58.3% | All: 6(5,9)<br>HCP: 6(5,9)<br>PCP: 6(5,9)       | All: 50.0%<br>HCP: 38.9%<br>PCP: 66.7% | All:<br>6.5(5.75,8)<br>HCP:<br>6(5.75,7.25)<br>PCP:<br>6.5(5.25,9) | All: 44.8%<br>HCP: 35.3%<br>PCP: 58.3% | All: 6(6,7.5)<br>HCP: 6(5.5,7)<br>PCP: 6(6,9)   | No  |

|                                                                                                                                          |                                                 |                                                                        |                                                 |                                                                    |                                                 |                                                             |            |
|------------------------------------------------------------------------------------------------------------------------------------------|-------------------------------------------------|------------------------------------------------------------------------|-------------------------------------------------|--------------------------------------------------------------------|-------------------------------------------------|-------------------------------------------------------------|------------|
| <p>4.Are there any treatments that reverse the liver damage in primary sclerosing cholangitis (PSC)?</p>                                 | <p>All: 59.4%<br/>HCP: 55.0%<br/>PCP: 66.7%</p> | <p>All:<br/>7.5(5,8.75)<br/>HCP:<br/>7.5(4.25,8)<br/>PCP: 7.5(6,9)</p> | <p>All: 70.0%<br/>HCP: 61.1%<br/>PCP: 83.3%</p> | <p>All: 7.5(6,9)<br/>HCP:<br/>7.5(4.75,8.25)<br/>PCP: 7.5(7,9)</p> | <p>All: 72.4%<br/>HCP: 64.7%<br/>PCP: 83.3%</p> | <p>All: 7(6,9)<br/>HCP: 7(5,8)<br/>PCP: 7(7,9)</p>          | <p>No</p>  |
| <p>5.What are the best treatments that cure or delay the progression (worsening) of non-alcohol-related fatty liver disease (NAFLD)?</p> | <p>All: 76.5%<br/>HCP: 75.0%<br/>PCP: 78.6%</p> | <p>All: 8(6.75,9)<br/>HCP:<br/>8.5(6.25,9)<br/>PCP:<br/>8(6.75,9)</p>  | <p>All: 87.5%<br/>HCP: 83.3%<br/>PCP: 92.9%</p> | <p>All: 8.5(7,9)<br/>HCP: 8.5(7,9)<br/>PCP: 8.5(7,9)</p>           | <p>All: 90.3%<br/>HCP: 88.2%<br/>PCP: 92.9%</p> | <p>All: 9(8,9)<br/>HCP: 9(7.5,9)<br/>PCP:<br/>9(7.75,9)</p> | <p>Yes</p> |
| <p>6.What are the best symptomatic treatments for itching in people with primary sclerosing cholangitis (PSC)?</p>                       | <p>All: 48.5%<br/>HCP: 45.0%<br/>PCP: 53.8%</p> | <p>All: 6(5,7.5)<br/>HCP: 6(5,7)<br/>PCP: 6(5.5,8)</p>                 | <p>All: 48.4%<br/>HCP: 38.9%<br/>PCP: 61.5%</p> | <p>All: 6(5,7)<br/>HCP:<br/>6(4.75,7)<br/>PCP: 6(6,8)</p>          | <p>All: 50.0%<br/>HCP: 41.2%<br/>PCP: 61.5%</p> | <p>All: 6.5(5,7)<br/>HCP: 6(4.5,7)<br/>PCP: 6.5(6,8)</p>    | <p>No</p>  |



|                                                                                                                                                                                                            |                                        |                                                 |                                        |                                             |                                        |                                                          |     |
|------------------------------------------------------------------------------------------------------------------------------------------------------------------------------------------------------------|----------------------------------------|-------------------------------------------------|----------------------------------------|---------------------------------------------|----------------------------------------|----------------------------------------------------------|-----|
| 7.Are there alternatives to invasive assessment of oesophageal varices in people with chronic liver disease?                                                                                               | All: 48.6%<br>HCP: 30.0%<br>PCP: 73.3% | All: 6(5,8)<br>HCP: 6(3,7)<br>PCP: 6(6,9)       | All: 54.5%<br>HCP: 33.3%<br>PCP: 80.0% | All: 7(5.5,8)<br>HCP: 6(4,7)<br>PCP: 7(7,9) | All: 56.3%<br>HCP: 29.4%<br>PCP: 86.7% | All: 7(6,8)<br>HCP: 6(4,7)<br>PCP: 7(7,9)                | No  |
| 8.Does vitamin D supplementation (adding Vitamin D in food or providing it in tablet form) increase the lifespan, health-related quality of life, and decrease complications in people with liver disease? | All: 37.1%<br>HCP: 21.1%<br>PCP: 56.3% | All: 6(4,7)<br>HCP: 4(4,6)<br>PCP: 6(6,9)       | All: 39.4%<br>HCP: 23.5%<br>PCP: 56.3% | All: 6(4,7)<br>HCP: 5(4,6.5)<br>PCP: 6(6,9) | All: 37.5%<br>HCP: 18.8%<br>PCP: 56.3% | All:<br>6(4.25,7.75)<br>HCP: 5(4,6)<br>PCP:<br>6(6,8.75) | No  |
| 9.Should new methods to improve the understanding of evidence be developed for people with liver and gallbladder diseases?                                                                                 | All: 38.2%<br>HCP: 25.0%<br>PCP: 57.1% | All: 6(4,8)<br>HCP:<br>5(4,6.75)<br>PCP: 6(5,9) | All: 46.9%<br>HCP: 27.8%<br>PCP: 71.4% | All: 6(4,8)<br>HCP: 5(4,7)<br>PCP: 6(5,9)   | All: 48.4%<br>HCP: 29.4%<br>PCP: 71.4% | All: 6(5,8)<br>HCP: 6(4.5,7)<br>PCP: 6(5,9)              | No  |
| 10.What is the best treatment for people with early or very early hepatocellular carcinoma (HCC)?                                                                                                          | All: 76.5%<br>HCP: 75.0%<br>PCP: 78.6% | All: 8(6.75,9)<br>HCP:<br>7(6.25,9)             | All: 87.5%<br>HCP: 88.9%<br>PCP: 85.7% | All: 8(7,9)<br>HCP: 8(7,9)<br>PCP: 8(7,9)   | All: 93.5%<br>HCP: 94.1%<br>PCP: 92.9% | All: 8(7,9)<br>HCP: 8(7,9)                               | Yes |

|                                                                                                                                                     |                                        |                                                     |                                        |                                                                |                                        |                                                 |     |
|-----------------------------------------------------------------------------------------------------------------------------------------------------|----------------------------------------|-----------------------------------------------------|----------------------------------------|----------------------------------------------------------------|----------------------------------------|-------------------------------------------------|-----|
|                                                                                                                                                     |                                        | PCP:<br>8(6.75,9)                                   |                                        |                                                                |                                        | PCP:<br>8(7.75,9)                               |     |
| 11.Should the methods used to assess nutrition of patients in liver disease be standardised?                                                        | All: 57.1%<br>HCP: 60.0%<br>PCP: 53.3% | All: 7(5,9)<br>HCP:<br>7(5,8.75)<br>PCP: 7(5,9)     | All: 54.5%<br>HCP: 55.6%<br>PCP: 53.3% | All: 7(5,8)<br>HCP: 7(5,8)<br>PCP: 7(5,9)                      | All: 59.4%<br>HCP: 58.8%<br>PCP: 60.0% | All: 7(5,8)<br>HCP: 7(5,8)<br>PCP: 7(5,8)       | No  |
| 12.Does dieting improve liver function and decrease the requirement for liver transplantation in obese people?                                      | All: 48.6%<br>HCP: 38.1%<br>PCP: 62.5% | All: 6(4,8)<br>HCP: 6(3,8)<br>PCP:<br>6(5.25,7)     | All: 44.1%<br>HCP: 27.8%<br>PCP: 62.5% | All: 6(4,7.25)<br>HCP:<br>6(3.75,7.25)<br>PCP:<br>6(5.25,7.75) | All: 48.5%<br>HCP: 29.4%<br>PCP: 68.8% | All: 6(5,7)<br>HCP: 6(5,7)<br>PCP:<br>6(5.25,7) | No  |
| 13.Should general public be educated about non-alcohol-related fatty liver disease (NAFLD) with an aim to reduce the numbers of those that have it? | All: 72.2%<br>HCP: 75.0%<br>PCP: 68.8% | All: 7.5(6,9)<br>HCP:<br>8(6.25,9)<br>PCP: 7.5(6,9) | All: 73.5%<br>HCP: 72.2%<br>PCP: 75.0% | All: 8(6,9)<br>HCP:<br>7.5(5.75,9)<br>PCP:<br>8(6.25,9)        | All: 81.8%<br>HCP: 82.4%<br>PCP: 81.3% | All: 8(7,9)<br>HCP: 8(7,9)<br>PCP: 8(7,9)       | Yes |

|                                                                                                                                                                                                                     |                                        |                                               |                                        |                                                         |                                        |                                                   |    |
|---------------------------------------------------------------------------------------------------------------------------------------------------------------------------------------------------------------------|----------------------------------------|-----------------------------------------------|----------------------------------------|---------------------------------------------------------|----------------------------------------|---------------------------------------------------|----|
| 14. What are the best symptomatic treatments for itching in people with chronic liver diseases other than primary sclerosing cholangitis (PSC) and primary biliary cholangitis (PBC)?                               | All: 48.5%<br>HCP: 35.0%<br>PCP: 69.2% | All: 6(4,5,7)<br>HCP: 6(4,7)<br>PCP: 6(5,7,5) | All: 48.4%<br>HCP: 27.8%<br>PCP: 76.9% | All: 6(5,7)<br>HCP: 6(4,7)<br>PCP: 6(6,8)               | All: 50.0%<br>HCP: 29.4%<br>PCP: 76.9% | All: 6.5(5,7)<br>HCP: 6(4,5,7)<br>PCP: 6.5(6.5,8) | No |
| 15. Do treatments targeted against deformation of bile duct (biliary stricture or narrowing of bile duct due to the illness) work better than other treatments in people with primary sclerosing cholangitis (PSC)? | All: 19.4%<br>HCP: 21.1%<br>PCP: 16.7% | All: 5(4,6)<br>HCP: 5(4,6)<br>PCP: 5(4,6)     | All: 20.0%<br>HCP: 16.7%<br>PCP: 25.0% | All: 5(4,6)<br>HCP:<br>5(3,7,5,6)<br>PCP:<br>5(4,6,7,5) | All: 20.7%<br>HCP: 17.6%<br>PCP: 25.0% | All: 5(4,6)<br>HCP: 5(3,5,6)<br>PCP: 5(4,6,7,5)   | No |
| 16. What are the treatments available to decrease weight in overweight people with non-alcohol-related fatty liver disease (NAFLD)?                                                                                 | All: 37.1%<br>HCP: 35.0%<br>PCP: 40.0% | All: 5(4,8)<br>HCP: 5.5(4,7)<br>PCP: 5(4,8)   | All: 27.3%<br>HCP: 22.2%<br>PCP: 33.3% | All: 6(4,7)<br>HCP:<br>6(4,6,2,5)<br>PCP: 6(3,8)        | All: 28.1%<br>HCP: 23.5%<br>PCP: 33.3% | All: 5(4,7)<br>HCP: 5(5,6,5)<br>PCP: 5(3,7)       | No |

|                                                                                                                                |                                        |                                                                   |                                        |                                                          |                                        |                                                       |    |
|--------------------------------------------------------------------------------------------------------------------------------|----------------------------------------|-------------------------------------------------------------------|----------------------------------------|----------------------------------------------------------|----------------------------------------|-------------------------------------------------------|----|
| 17. What are the best treatments that cure or delay the progression (worsening) of non-alcohol related steatohepatitis (NASH)? | All: 67.6%<br>HCP: 71.4%<br>PCP: 61.5% | All: 8(5,8.25)<br>HCP: 8(5.5,9)<br>PCP: 8(5,8)                    | All: 71.0%<br>HCP: 77.8%<br>PCP: 61.5% | All: 8(6,9)<br>HCP:<br>7.5(6.75,9)<br>PCP: 8(5,8.5)      | All: 76.7%<br>HCP: 82.4%<br>PCP: 69.2% | All: 8(6.75,9)<br>HCP: 8(7,9)<br>PCP: 8(5,8.5)        | No |
| 18. Do statins (or other treatments) delay liver failure in people with advanced liver disease?                                | All: 45.7%<br>HCP: 36.8%<br>PCP: 56.3% | All: 6(5,7)<br>HCP: 6(4,7)<br>PCP:<br>6(6,7.75)                   | All: 39.4%<br>HCP: 35.3%<br>PCP: 43.8% | All: 6(6,7)<br>HCP: 6(3.5,7)<br>PCP:<br>6(6,7.75)        | All: 43.8%<br>HCP: 37.5%<br>PCP: 50.0% | All: 6(6,7)<br>HCP:<br>6(5.25,7)<br>PCP:<br>6(6,7.75) | No |
| 19. What are the best treatments that provide temporary symptom relief in people with advanced liver disease?                  | All: 50.0%<br>HCP: 35.0%<br>PCP: 68.8% | All:<br>6.5(5,7.75)<br>HCP: 6(5,7)<br>PCP:<br>6.5(5.25,8.75)<br>) | All: 52.9%<br>HCP: 33.3%<br>PCP: 75.0% | All:<br>7(5.75,7.25)<br>HCP: 6(5,7)<br>PCP:<br>7(6.25,8) | All: 54.5%<br>HCP: 35.3%<br>PCP: 75.0% | All: 7(6,7)<br>HCP: 6(5,7)<br>PCP:<br>7(6.25,8)       | No |

|                                                                                                                                                                                                                                               |                                        |                                             |                                        |                                                     |                                        |                                                   |     |
|-----------------------------------------------------------------------------------------------------------------------------------------------------------------------------------------------------------------------------------------------|----------------------------------------|---------------------------------------------|----------------------------------------|-----------------------------------------------------|----------------------------------------|---------------------------------------------------|-----|
| 20. Which is the most suitable antibiotic (or combination of antibiotics) in people with cholangitis (biliary infection)?                                                                                                                     | All: 64.7%<br>HCP: 70.0%<br>PCP: 57.1% | All: 7(5,8)<br>HCP: 7(6,8)<br>PCP: 7(5,8)   | All: 68.8%<br>HCP: 72.2%<br>PCP: 64.3% | All: 7(5.25,8)<br>HCP: 7(6,8)<br>PCP: 7(5,8)        | All: 67.7%<br>HCP: 70.6%<br>PCP: 64.3% | All: 7(5,8)<br>HCP: 7(6,8)<br>PCP: 7(5,8)         | No  |
| 21. What are the best treatments that cure or delay the progression (worsening) of autoimmune hepatitis (AIH)?                                                                                                                                | All: 75.8%<br>HCP: 68.4%<br>PCP: 85.7% | All: 7(6.5,9)<br>HCP: 7(6,8)<br>PCP: 7(7,9) | All: 81.3%<br>HCP: 77.8%<br>PCP: 85.7% | All: 7.5(7,9)<br>HCP:<br>7(6.75,8)<br>PCP: 7.5(7,9) | All: 80.6%<br>HCP: 76.5%<br>PCP: 85.7% | All: 8(7,9)<br>HCP: 7(6.5,8)<br>PCP: 8(7,9)       | Yes |
| 22. Are there any methods other than liver biopsy (obtaining a piece of liver, usually using a needle, for examination under microscope) for the early diagnosis of primary sclerosing cholangitis (PSC) in people at risk of developing PSC? | All: 53.1%<br>HCP: 36.8%<br>PCP: 76.9% | All: 7(5,8)<br>HCP: 6(5,7)<br>PCP: 7(6.5,8) | All: 60.0%<br>HCP: 47.1%<br>PCP: 76.9% | All: 7(5,8)<br>HCP: 6(5,8)<br>PCP: 7(6.5,8)         | All: 58.6%<br>HCP: 43.8%<br>PCP: 76.9% | All: 7(5,8)<br>HCP:<br>6(5,7.75)<br>PCP: 7(6.5,8) | No  |
| 23. What are the best nutritional interventions in people undergoing liver transplantation?                                                                                                                                                   | All: 52.8%<br>HCP: 42.9%<br>PCP: 66.7% | All: 7(5,8)<br>HCP: 6(4,8)<br>PCP: 7(5,8)   | All: 51.5%<br>HCP: 38.9%<br>PCP: 66.7% | All: 7(5,8)<br>HCP:                                 | All: 53.1%<br>HCP: 41.2%<br>PCP: 66.7% | All: 7(5,8)<br>HCP: 6(5,7)<br>PCP: 7(6,8)         | No  |

|                                                                                                                                                                                                                                                                                                             |                                        |                                                 |                                        |                                                    |                                        |                                                 |    |
|-------------------------------------------------------------------------------------------------------------------------------------------------------------------------------------------------------------------------------------------------------------------------------------------------------------|----------------------------------------|-------------------------------------------------|----------------------------------------|----------------------------------------------------|----------------------------------------|-------------------------------------------------|----|
|                                                                                                                                                                                                                                                                                                             |                                        |                                                 |                                        | 6(4,7.25)<br>PCP: 7(5,8)                           |                                        |                                                 |    |
| 24.What are the best symptomatic treatments for fatigue (tiredness), joint pain, and other symptoms in people with people with autoimmune hepatitis (AIH)?                                                                                                                                                  | All: 61.8%<br>HCP: 45.0%<br>PCP: 85.7% | All: 7(6,8)<br>HCP:<br>6(3.25,7)<br>PCP: 7(7,9) | All: 65.6%<br>HCP: 50.0%<br>PCP: 85.7% | All: 7(6,8)<br>HCP:<br>6.5(3.75,7)<br>PCP: 7(7,9)  | All: 64.5%<br>HCP: 47.1%<br>PCP: 85.7% | All: 7(6,8)<br>HCP: 6(4,7)<br>PCP: 7(7,9)       | No |
| 25.Prior to liver transplantation, is it better to transport the donor liver using a machine which pumps blood or preservation solution through the liver (machine perfusion) or is it better to transport it in the standard way of transporting it immersed in cold preservation solution (cold storage)? | All: 54.5%<br>HCP: 42.1%<br>PCP: 71.4% | All: 7(5,9)<br>HCP: 6(5,8)<br>PCP: 7(6,9)       | All: 68.8%<br>HCP: 61.1%<br>PCP: 78.6% | All: 7(6,8.75)<br>HCP: 7(5,8)<br>PCP:<br>7(6.75,9) | All: 74.2%<br>HCP: 70.6%<br>PCP: 78.6% | All: 7(6,9)<br>HCP: 7(6,8)<br>PCP:<br>7(6.75,9) | No |

1  
2  
3  
4  
5  
6  
7  
8  
9  
10  
11  
12  
13  
14  
15  
16  
17  
18  
19  
20  
21  
22  
23  
24  
25  
26  
27  
28  
29  
30  
31  
32  
33  
34  
35  
36  
37  
38  
39  
40  
41  
42  
43  
44  
45  
46

|                                                                                                                                                                                             |                                        |                                                           |                                        |                                                          |                                        |                                                    |    |
|---------------------------------------------------------------------------------------------------------------------------------------------------------------------------------------------|----------------------------------------|-----------------------------------------------------------|----------------------------------------|----------------------------------------------------------|----------------------------------------|----------------------------------------------------|----|
| 26.What are the best treatments that cure or delay the progression (worsening) of chronic hepatitis C virus (HCV) infection?                                                                | All: 42.4%<br>HCP: 42.9%<br>PCP: 41.7% | All: 6(2,8)<br>HCP: 5(1,8)<br>PCP:<br>6(4.25,7.75)        | All: 40.0%<br>HCP: 44.4%<br>PCP: 33.3% | All: 5.5(2,7)<br>HCP: 4.5(1,8)<br>PCP:<br>5.5(4.25,7)    | All: 37.9%<br>HCP: 47.1%<br>PCP: 25.0% | All: 5(2,7)<br>HCP: 5(1,8)<br>PCP:<br>5(4.25,6.75) | No |
| 27.Does education of people with liver disease about the natural course and treatment of liver disease improve the patient knowledge, patient responsibility, and decrease hospital visits? | All: 51.4%<br>HCP: 52.4%<br>PCP: 50.0% | All: 7(4,8)<br>HCP:<br>7(4.5,7.5)<br>PCP:<br>7(3.25,8.75) | All: 58.8%<br>HCP: 50.0%<br>PCP: 68.8% | All: 7(4,7.25)<br>HCP: 6.5(4,7)<br>PCP:<br>7(4,8.75)     | All: 57.6%<br>HCP: 47.1%<br>PCP: 68.8% | All: 7(4,8)<br>HCP: 6(4,7)<br>PCP: 7(4,8)          | No |
| 28.What are the best treatments that cure or delay the progression (worsening) of primary biliary cholangitis (PBC)?                                                                        | All: 61.8%<br>HCP: 60.0%<br>PCP: 64.3% | All: 7(5.75,8)<br>HCP: 7(6,8)<br>PCP: 7(5,8)              | All: 68.8%<br>HCP: 66.7%<br>PCP: 71.4% | All: 7(6,8)<br>HCP:<br>7(5.75,8)<br>PCP:<br>7(5.75,8.25) | All: 74.2%<br>HCP: 70.6%<br>PCP: 78.6% | All: 7(6,8)<br>HCP: 7(6,8)<br>PCP:<br>7(6.5,8.25)  | No |

|                                                                                                                                                                                         |                                        |                                                        |                                        |                                                   |                                        |                                                   |    |
|-----------------------------------------------------------------------------------------------------------------------------------------------------------------------------------------|----------------------------------------|--------------------------------------------------------|----------------------------------------|---------------------------------------------------|----------------------------------------|---------------------------------------------------|----|
| 29. Is nurse-led care as effective or better than doctor-led care for non-alcohol related fatty liver disease (NAFLD)?                                                                  | All: 38.2%<br>HCP: 35.0%<br>PCP: 42.9% | All: 5(4,8)<br>HCP:<br>4.5(3,7.75)<br>PCP: 5(4,8)      | All: 31.3%<br>HCP: 27.8%<br>PCP: 35.7% | All: 5(4,7)<br>HCP: 4(3,7)<br>PCP:<br>5(4,7.25)   | All: 25.8%<br>HCP: 23.5%<br>PCP: 28.6% | All: 5(4,7)<br>HCP:<br>4(3.5,6.5)<br>PCP: 5(4,7)  | No |
| 30. Is treatment targeted against deformation of bile duct (biliary stricture or narrowing of bile duct due to cancer) better than standard treatment for people with bile duct cancer? | All: 35.5%<br>HCP: 27.8%<br>PCP: 46.2% | All: 5(4,7)<br>HCP:<br>5(2.75,7)<br>PCP: 5(4,7.5)      | All: 22.6%<br>HCP: 11.1%<br>PCP: 38.5% | All: 5(4,6)<br>HCP: 5(3.5,6)<br>PCP: 5(4,7)       | All: 20.0%<br>HCP: 11.8%<br>PCP: 30.8% | All: 5(4,6)<br>HCP: 5(3.5,6)<br>PCP: 5(4,7)       | No |
| 31. Is surgery (in the form of removal of gallbladder) required in people with gallstones?                                                                                              | All: 24.2%<br>HCP: 23.8%<br>PCP: 25.0% | All: 5(4,6.5)<br>HCP: 5(4,6.5)<br>PCP:<br>5(4.25,6.75) | All: 30.0%<br>HCP: 33.3%<br>PCP: 25.0% | All: 5(4,7)<br>HCP: 5(4,7)<br>PCP:<br>5(3.5,6.75) | All: 24.1%<br>HCP: 29.4%<br>PCP: 16.7% | All: 5(4.5,6.5)<br>HCP: 5(4.5,7)<br>PCP: 5(3.5,6) | No |
| 32. Should people with non-alcohol-related fatty liver disease (NAFLD) and non-alcohol-related steatohepatitis                                                                          | All: 52.9%<br>HCP: 50.0%<br>PCP: 57.1% | All: 7(4,8)<br>HCP:<br>PCP:                            | All: 56.3%<br>HCP: 50.0%<br>PCP: 64.3% | All: 7(4.25,8)<br>HCP:<br>6.5(2,7.25)             | All: 54.8%<br>HCP: 47.1%<br>PCP: 64.3% | All: 7(5,8)<br>HCP: 6(4,7.5)<br>PCP:              | No |



|                                                                                                                                                                                                                                 |                                        |                                                    |                                        |                                                 |                                         |                                                 |     |
|---------------------------------------------------------------------------------------------------------------------------------------------------------------------------------------------------------------------------------|----------------------------------------|----------------------------------------------------|----------------------------------------|-------------------------------------------------|-----------------------------------------|-------------------------------------------------|-----|
| (NASH) receive additional education about the condition?                                                                                                                                                                        |                                        | 6.5(2.5,7.75)<br>PCP: 7(4,9)                       |                                        | PCP:<br>7(5.75,8.25)                            |                                         | PCP:<br>7(5.75,8.25)                            |     |
| 33.What is the best immunosuppressive regimen in adults undergoing liver transplantation?                                                                                                                                       | All: 73.5%<br>HCP: 60.0%<br>PCP: 92.9% | All: 7(6,9)<br>HCP: 7(5,8)<br>PCP: 7(7,9)          | All: 84.4%<br>HCP: 77.8%<br>PCP: 92.9% | All: 8(7,9)<br>HCP: 7(6.5,8)<br>PCP: 8(7,9)     | All: 90.3%<br>HCP: 82.4%<br>PCP: 100.0% | All: 8(7,9)<br>HCP: 8(7,8)<br>PCP:<br>8(7.75,9) | Yes |
| 34.Is endoscopic ultrasound (EUS) (using a ultrasound attached to the end of an endoscope) or magnetic resonance cholangio pancreatography (MRCP, a form of MRI scan) better in the diagnosis of common bile duct (CBD) stones? | All: 36.7%<br>HCP: 22.2%<br>PCP: 58.3% | All: 5(4,7)<br>HCP:<br>4(3.75,6.25)<br>PCP: 5(5,7) | All: 30.0%<br>HCP: 22.2%<br>PCP: 41.7% | All: 5(4,7)<br>HCP:<br>5(4,6.25)<br>PCP: 5(5,7) | All: 20.7%<br>HCP: 11.8%<br>PCP: 33.3%  | All: 5(4,6)<br>HCP: 5(4,6)<br>PCP: 5(5,7)       | No  |
| 35.How can we improve compliance to treatment (adherence to treatment or the degree to which a patient correctly                                                                                                                | All: 67.6%<br>HCP: 75.0%<br>PCP: 57.1% | All: 7(5,8)<br>HCP:<br>7(6.25,8)                   | All: 69.7%<br>HCP: 72.2%<br>PCP: 66.7% | All: 7(5,8)<br>HCP:<br>7(4.75,8)<br>PCP: 7(5,8) | All: 71.9%<br>HCP: 70.6%<br>PCP: 73.3%  | All: 7(5,8)<br>HCP: 7(5,8)<br>PCP: 7(5,8)       | No  |

|                                                                                                                                                                                 |                                        |                                                     |                                        |                                                          |                                        |                                                   |    |
|---------------------------------------------------------------------------------------------------------------------------------------------------------------------------------|----------------------------------------|-----------------------------------------------------|----------------------------------------|----------------------------------------------------------|----------------------------------------|---------------------------------------------------|----|
| follows medical advice) in people with liver disease?                                                                                                                           |                                        | PCP:<br>7(4.75,8)                                   |                                        |                                                          |                                        |                                                   |    |
| 36.What are the best symptomatic treatments for relief of ulcerative colitis (UC) in people with primary sclerosing cholangitis (PSC) who have undergone liver transplantation? | All: 51.6%<br>HCP: 36.8%<br>PCP: 75.0% | All: 7(5,8)<br>HCP: 6(4,7)<br>PCP:<br>7(5.5,8.75)   | All: 56.7%<br>HCP: 44.4%<br>PCP: 75.0% | All: 7(5,8)<br>HCP:<br>6(4.75,7)<br>PCP:<br>7(6.25,8.75) | All: 55.2%<br>HCP: 41.2%<br>PCP: 75.0% | All: 7(6,8)<br>HCP: 6(5.5,7)<br>PCP:<br>7(6.25,9) | No |
| 37.What are the best symptomatic treatments for itching and fatigue (tiredness) in people with primary biliary cholangitis (PBC)?                                               | All: 50.0%<br>HCP: 45.0%<br>PCP: 57.1% | All: 6.5(5,7)<br>HCP: 6(5,7)<br>PCP:<br>6.5(5,7.25) | All: 43.8%<br>HCP: 33.3%<br>PCP: 57.1% | All: 6(5,7)<br>HCP: 6(5,7)<br>PCP: 6(5,8)                | All: 41.9%<br>HCP: 29.4%<br>PCP: 57.1% | All: 6(5,7)<br>HCP: 6(5,7)<br>PCP: 6(5,8)         | No |
| 38.Does education of people with asymptomatic (absence of symptoms) liver disease result in change of life style and cure/delay the progression (worsening) of liver disease?   | All: 54.3%<br>HCP: 45.0%<br>PCP: 66.7% | All: 7(5,8)<br>HCP:<br>6(4.25,7.75)<br>PCP: 7(5,8)  | All: 51.5%<br>HCP: 38.9%<br>PCP: 66.7% | All: 7(4.5,8)<br>HCP:<br>5(3.5,7.25)<br>PCP: 7(5,8)      | All: 53.1%<br>HCP: 35.3%<br>PCP: 73.3% | All: 7(5,7.75)<br>HCP: 5(4,7)<br>PCP: 7(5,8)      | No |

1  
2  
3  
4  
5  
6  
7  
8  
9  
10  
11  
12  
13  
14  
15  
16  
17  
18  
19  
20  
21  
22  
23  
24  
25  
26  
27  
28  
29  
30  
31  
32  
33  
34  
35  
36  
37  
38  
39  
40  
41  
42  
43  
44  
45  
46

|                                                                                                                                                                                                                        |                                        |                                                 |                                        |                                                          |                                        |                                                        |    |
|------------------------------------------------------------------------------------------------------------------------------------------------------------------------------------------------------------------------|----------------------------------------|-------------------------------------------------|----------------------------------------|----------------------------------------------------------|----------------------------------------|--------------------------------------------------------|----|
| 39. What are the best treatments that are available for the treatment of pregnant women with cholestasis (condition where bile flow from the liver is obstructed)?                                                     | All: 38.7%<br>HCP: 25.0%<br>PCP: 63.6% | All: 6(4,7)<br>HCP:<br>5(4,6.75)<br>PCP: 6(6,8) | All: 31.0%<br>HCP: 27.8%<br>PCP: 36.4% | All: 6(4.5,7)<br>HCP: 5(4,7)<br>PCP: 6(6,8)              | All: 27.6%<br>HCP: 23.5%<br>PCP: 33.3% | All: 6(5,7)<br>HCP:<br>5(4.5,6.5)<br>PCP:<br>6(5.25,7) | No |
| 40. Is transarterial chemoembolisation (TACE) or transarterial embolisation (TAE) (blocking the blood supply to cancer with or without chemotherapy drugs) effective in the treatment of people with liver metastases? | All: 40.6%<br>HCP: 36.8%<br>PCP: 46.2% | All: 6(4,8)<br>HCP: 6(3,8)<br>PCP: 6(5,8.5)     | All: 34.4%<br>HCP: 22.2%<br>PCP: 50.0% | All: 6(4,7)<br>HCP:<br>5.5(3,6.25)<br>PCP: 6(5,7)        | All: 32.3%<br>HCP: 23.5%<br>PCP: 42.9% | All: 6(5,7)<br>HCP:<br>6(3.5,6.5)<br>PCP: 6(5,7)       | No |
| 41. Should people with liver metastases (cancer spread to the liver) from neuroendocrine cancer (a form of cancer that arises from cells that secrete                                                                  | All: 36.7%<br>HCP: 31.6%<br>PCP: 45.5% | All: 6(4,7.25)<br>HCP: 6(4,7)<br>PCP: 6(5,8)    | All: 40.0%<br>HCP: 38.9%<br>PCP: 41.7% | All:<br>6(4.75,7.25)<br>HCP: 6(4,7)<br>PCP:<br>6(5.25,8) | All: 37.9%<br>HCP: 41.2%<br>PCP: 33.3% | All: 6(5.5,7)<br>HCP: 6(5,7)<br>PCP:<br>6(5.25,8)      | No |

|                                                                                                                              |                                        |                                              |                                        |                                                      |                                        |                                               |    |
|------------------------------------------------------------------------------------------------------------------------------|----------------------------------------|----------------------------------------------|----------------------------------------|------------------------------------------------------|----------------------------------------|-----------------------------------------------|----|
| hormones and nervous system) undergo liver resection?                                                                        |                                        |                                              |                                        |                                                      |                                        |                                               |    |
| 42.What are the best methods available to decrease blood loss during liver resection?                                        | All: 43.8%<br>HCP: 26.3%<br>PCP: 69.2% | All: 6(5,7.75)<br>HCP: 5(3,7)<br>PCP: 6(6,8) | All: 48.4%<br>HCP: 27.8%<br>PCP: 76.9% | All: 6(5,8)<br>HCP: 5.5(4,7)<br>PCP: 6(6.5,8)        | All: 46.7%<br>HCP: 29.4%<br>PCP: 69.2% | All: 6(5,7.25)<br>HCP: 6(5,7)<br>PCP: 6(6,8)  | No |
| 43.What are the best treatments that cure or delay the progression (worsening) of chronic hepatitis B virus (HBV) infection? | All: 51.6%<br>HCP: 42.1%<br>PCP: 66.7% | All: 7(4,8)<br>HCP: 6(4,7)<br>PCP: 7(6,8)    | All: 46.7%<br>HCP: 38.9%<br>PCP: 58.3% | All:<br>6(4.75,7.25)<br>HCP: 5.5(4,7)<br>PCP: 6(6,8) | All: 48.3%<br>HCP: 41.2%<br>PCP: 58.3% | All: 6(5,7.5)<br>HCP: 6(4.5,7)<br>PCP: 6(6,8) | No |
| 44.What are the best treatments for people with polycystic liver disease?                                                    | All: 39.3%<br>HCP: 17.6%<br>PCP: 72.7% | All: 6(4,8)<br>HCP: 5(4,6)<br>PCP: 6(6,8)    | All: 34.5%<br>HCP: 16.7%<br>PCP: 63.6% | All: 6(4,8)<br>HCP:<br>5(3.75,6)<br>PCP: 6(6,8)      | All: 35.7%<br>HCP: 17.6%<br>PCP: 63.6% | All: 6(5,7)<br>HCP: 5(4,6)<br>PCP: 6(6,7)     | No |
| 45.Should the HCP dealing with childhood liver diseases be provided additional education about childhood liver diseases      | All: 35.5%<br>HCP: 15.0%<br>PCP: 72.7% | All: 5(3,8)<br>HCP:                          | All: 37.9%<br>HCP: 16.7%<br>PCP: 72.7% | All: 5(3.5,7.5)<br>HCP:                              | All: 37.9%<br>HCP: 17.6%<br>PCP: 66.7% | All: 5(4.5,7.5)<br>HCP: 5(2,5.5)              | No |

|                                                                                                    |                                                                                                                                                          |                                        |                                                 |                                        |                                                                   |                                        |                                                   |    |
|----------------------------------------------------------------------------------------------------|----------------------------------------------------------------------------------------------------------------------------------------------------------|----------------------------------------|-------------------------------------------------|----------------------------------------|-------------------------------------------------------------------|----------------------------------------|---------------------------------------------------|----|
| 1<br>2<br>3<br>4<br>5<br>6<br>7<br>8<br>9                                                          | compared to standard education where childhood diseases are learnt as part of overall education?                                                         |                                        | 5(2,5.75)<br>PCP: 5(5,9)                        |                                        | 5(2,5.25)<br>PCP: 5(6,9)                                          |                                        | PCP:<br>5(6,8.75)                                 |    |
| 10<br>11<br>12<br>13<br>14<br>15<br>16                                                             | 46.What is the best immunosuppressive regimen in children undergoing liver transplantation?                                                              | All: 65.6%<br>HCP: 57.9%<br>PCP: 76.9% | All: 8(4.25,9)<br>HCP: 7(4,8)<br>PCP: 8(6,9)    | All: 67.7%<br>HCP: 61.1%<br>PCP: 76.9% | All: 8(6,9)<br>HCP: 7.5(4,8)<br>PCP: 8(6.5,9)                     | All: 70.0%<br>HCP: 64.7%<br>PCP: 76.9% | All: 8(6,9)<br>HCP: 8(5,8)<br>PCP: 8(6.5,9)       | No |
| 17<br>18<br>19<br>20<br>21<br>22<br>23<br>24<br>25<br>26<br>27<br>28<br>29                         | 47.Should blood vessels supplying the liver be temporarily blocked in people undergoing liver resection? If so, what is the best way of performing this? | All: 31.0%<br>HCP: 11.1%<br>PCP: 63.6% | All: 6(4,7)<br>HCP:<br>5(2.75,6)<br>PCP: 6(5,7) | All: 26.7%<br>HCP: 11.1%<br>PCP: 50.0% | All: 5.5(4,7)<br>HCP:<br>5(3.75,6)<br>PCP:<br>5.5(5.25,7.75)<br>) | All: 27.6%<br>HCP: 11.8%<br>PCP: 50.0% | All: 6(5,7)<br>HCP: 5(4,6)<br>PCP:<br>6(5.25,7)   | No |
| 30<br>31<br>32<br>33<br>34<br>35<br>36<br>37<br>38<br>39<br>40<br>41<br>42<br>43<br>44<br>45<br>46 | 48.What is the best treatment that should be given to people who undergo liver transplantation for chronic hepatitis B virus (HBV) infection to prevent  | All: 46.9%<br>HCP: 40.0%<br>PCP: 58.3% | All: 6(3.5,7)<br>HCP: 6(3,7)<br>PCP: 6(6,8)     | All: 36.7%<br>HCP: 22.2%<br>PCP: 58.3% | All: 6(3,7)<br>HCP:<br>6(2.75,6.25)                               | All: 37.9%<br>HCP: 23.5%<br>PCP: 58.3% | All: 6(5,7)<br>HCP: 6(4,6.5)<br>PCP:<br>6(6,7.75) | No |

|                                                                      |                                                                                                               |   |   |                                        |                                                            |                                        |                                                          |    |
|----------------------------------------------------------------------|---------------------------------------------------------------------------------------------------------------|---|---|----------------------------------------|------------------------------------------------------------|----------------------------------------|----------------------------------------------------------|----|
| 1<br>2<br>3<br>4<br>5<br>6<br>7                                      | reinfection with chronic hepatitis B virus (HBV) infection?                                                   |   |   |                                        | PCP:<br>6(6,7.75)                                          |                                        |                                                          |    |
| 8<br>9<br>10<br>11<br>12<br>13<br>14<br>15<br>16                     | 49.Are there alternatives to steroids in treating people with autoimmune hepatitis (AIH)?                     | - | - | All: 51.9%<br>HCP: 40.0%<br>PCP: 66.7% | All: 7(5,8)<br>HCP: 6(4,7)<br>PCP: 7(6,9)                  | All: 50.0%<br>HCP: 35.7%<br>PCP: 66.7% | All: 6.5(5,8)<br>HCP:<br>5.5(3.75,7)<br>PCP: 6.5(6,9)    | No |
| 17<br>18<br>19<br>20<br>21<br>22<br>23<br>24<br>25                   | 50.What impact does the home situation have on recovery from chronic liver disease and its treatment?         | - | - | All: 34.5%<br>HCP: 13.3%<br>PCP: 57.1% | All: 5(3.5,7.5)<br>HCP: 4(3,6)<br>PCP: 5(5,8)              | All: 32.1%<br>HCP: 0.0%<br>PCP: 64.3%  | All: 5(4,7)<br>HCP:<br>4(3,5.25)<br>PCP: 5(5,8)          | No |
| 26<br>27<br>28<br>29<br>30<br>31<br>32<br>33<br>34<br>35<br>36<br>37 | 51.Does cure of hepatitis C provide benefits to the patient outside reduction in liver related complications? | - | - | All: 29.2%<br>HCP: 33.3%<br>PCP: 22.2% | All:<br>5.5(3.25,7)<br>HCP: 5(3,7)<br>PCP:<br>5.5(4.5,6.5) | All: 30.4%<br>HCP: 35.7%<br>PCP: 22.2% | All: 6(4,7)<br>HCP:<br>5.5(3,7.25)<br>PCP:<br>6(4.5,6.5) | No |

|                                                                                        |                                                                                                                                                                                    |   |   |                                        |                                                      |                                        |                                                       |    |
|----------------------------------------------------------------------------------------|------------------------------------------------------------------------------------------------------------------------------------------------------------------------------------|---|---|----------------------------------------|------------------------------------------------------|----------------------------------------|-------------------------------------------------------|----|
| 1<br>2<br>3<br>4<br>5<br>6<br>7<br>8<br>9<br>10<br>11                                  | 52.How fast does liver fibrosis (scarring) actually progress in non-alcoholic liver disease patients and does this predict overall outcome?                                        | - | - | All: 62.1%<br>HCP: 40.0%<br>PCP: 85.7% | All: 7(6,8)<br>HCP: 6(5,8)<br>PCP:<br>7(7,8.25)      | All: 64.3%<br>HCP: 42.9%<br>PCP: 85.7% | All: 7.5(6,8)<br>HCP: 6(5,8)<br>PCP:<br>7.5(7,8.25)   | No |
| 12<br>13<br>14<br>15<br>16<br>17<br>18<br>19<br>20                                     | 53.Should direct-acting antiviral treatments therapies be made more easily accessible to GPs and drug service clinics for treatment of hepatitis C virus?                          | - | - | All: 50.0%<br>HCP: 46.7%<br>PCP: 55.6% | All: 6.5(3.5,7)<br>HCP: 6(3,7)<br>PCP:<br>6.5(5.5,8) | All: 52.2%<br>HCP: 50.0%<br>PCP: 55.6% | All: 7(5,7)<br>HCP:<br>6.5(4.5,7.25)<br>PCP: 7(5.5,8) | No |
| 21<br>22<br>23<br>24<br>25<br>26<br>27<br>28<br>29<br>30<br>31                         | 54.Should patients diagnosed with liver fibrosis/cirrhosis related to NAFLD (non-alcoholic fatty liver disease) be offered more intensive nutritional support or dietician review? | - | - | All: 60.7%<br>HCP: 46.7%<br>PCP: 76.9% | All: 7(5,8)<br>HCP: 6(3,8)<br>PCP: 7(6.5,9)          | All: 63.0%<br>HCP: 50.0%<br>PCP: 76.9% | All: 7(5,8)<br>HCP: 7(4.5,8)<br>PCP:<br>7(6.5,8.5)    | No |
| 32<br>33<br>34<br>35<br>36<br>37<br>38<br>39<br>40<br>41<br>42<br>43<br>44<br>45<br>46 | 55.Why have there been no alternatives to surgery in the form of new drug                                                                                                          | - | - | All: 29.2%<br>HCP: 20.0%<br>PCP: 44.4% | All:<br>4.5(1.25,7)<br>HCP: 4(1,6)                   | All: 26.1%<br>HCP: 21.4%<br>PCP: 33.3% | All: 4(2,7)<br>HCP:                                   | No |

|                                                                                                                                                                                                                                |   |   |                                                 |                                                          |                                                 |                                                                     |    |
|--------------------------------------------------------------------------------------------------------------------------------------------------------------------------------------------------------------------------------|---|---|-------------------------------------------------|----------------------------------------------------------|-------------------------------------------------|---------------------------------------------------------------------|----|
| <p>treatments for gall bladder disease &amp; biliary sludge?</p>                                                                                                                                                               |   |   |                                                 | <p>PCP:<br/>4.5(2,7.5)</p>                               |                                                 | <p>4(1.75,5.5)<br/>PCP: 4(2,7.5)</p>                                |    |
| <p>56. Why is there no proper evidence-based research on nutrition as a way of managing gall bladder disease/biliary sludge?</p>                                                                                               | - | - | <p>All: 36.0%<br/>HCP: 26.7%<br/>PCP: 50.0%</p> | <p>All: 5(1.5,7)<br/>HCP: 4(1,7)<br/>PCP: 5(2.5,7.5)</p> | <p>All: 33.3%<br/>HCP: 28.6%<br/>PCP: 40.0%</p> | <p>All: 5(2,7)<br/>HCP:<br/>4.5(1.75,7)<br/>PCP:<br/>5(2.5,7.5)</p> | No |
| <p>57. Why is there such variability in the natural progression of people with primary sclerosing cholangitis: some are very sick and require a transplant whereas others can remain relatively healthy for a long period?</p> | - | - | <p>All: 56.0%<br/>HCP: 42.9%<br/>PCP: 72.7%</p> | <p>All: 7(6,7)<br/>HCP: 6(4,7)<br/>PCP: 7(6,8)</p>       | <p>All: 54.2%<br/>HCP: 38.5%<br/>PCP: 72.7%</p> | <p>All: 7(6,7)<br/>HCP: 6(4,7)<br/>PCP: 7(6,8)</p>                  | No |
| <p>58. What are the warning signals that primary sclerosing cholangitis will be aggressive or cancerous?</p>                                                                                                                   | - | - | <p>All: 57.7%<br/>HCP: 53.3%<br/>PCP: 63.6%</p> | <p>All:<br/>7(5.75,8.25)</p>                             | <p>All: 60.0%<br/>HCP: 50.0%<br/>PCP: 72.7%</p> | <p>All: 7(5.5,8)<br/>HCP:</p>                                       | No |



|                                                                                                                                                                                                  |   |   |                                        |                                              |                                        |                                                             |    |
|--------------------------------------------------------------------------------------------------------------------------------------------------------------------------------------------------|---|---|----------------------------------------|----------------------------------------------|----------------------------------------|-------------------------------------------------------------|----|
|                                                                                                                                                                                                  |   |   |                                        | HCP: 7(5,8)<br>PCP: 7(6,9)                   |                                        | 6.5(4.75,8)<br>PCP: 7(6,9)                                  |    |
| 59.Does information on the impact of the complication on the people's quality of life improve the patient's informed decision- making process about treatment of liver and gallbladder diseases? | - | - | All: 46.4%<br>HCP: 40.0%<br>PCP: 53.8% | All: 6(4,7)<br>HCP: 6(4,7)<br>PCP: 6(4.5,8)  | All: 44.4%<br>HCP: 35.7%<br>PCP: 53.8% | All: 6(4,7)<br>HCP: 5.5(4,7)<br>PCP: 6(5,8)                 | No |
| 60.Will clinical pathways developed with patients and HCP having an equal say result in greater patient satisfaction and health in people with liver and gallbladder diseases?                   | - | - | All: 44.8%<br>HCP: 33.3%<br>PCP: 57.1% | All: 6(4.5,8)<br>HCP: 5(4,8)<br>PCP: 6(5,8)  | All: 46.4%<br>HCP: 35.7%<br>PCP: 57.1% | All: 6(4.25,8)<br>HCP:<br>5(3.75,8)<br>PCP:<br>6(5.75,8.25) | No |
| 61.Should high school teenagers be educated about the risks of hepatitis C?                                                                                                                      | - | - | All: 53.8%<br>HCP: 40.0%<br>PCP: 72.7% | All: 7(3.75,8)<br>HCP: 5(2,7)<br>PCP: 7(6,9) | All: 57.7%<br>HCP: 42.9%<br>PCP: 75.0% | All:<br>7(4.75,7.25)<br>HCP: 5.5(2,7)                       | No |

|                                                                                                                                                                  |   |   |                                        |                                              |                                        |                                                     |    |
|------------------------------------------------------------------------------------------------------------------------------------------------------------------|---|---|----------------------------------------|----------------------------------------------|----------------------------------------|-----------------------------------------------------|----|
|                                                                                                                                                                  |   |   |                                        |                                              |                                        | PCP:<br>7(6.25,8.75)                                |    |
| 62.How can patients with end stage liver failure be better prepared for end of life. How can the HCP supporting them be better prepared to provide that support? | - | - | All: 65.5%<br>HCP: 46.7%<br>PCP: 85.7% | All: 7(6,8)<br>HCP: 6(5,8)<br>PCP: 7(7,9)    | All: 67.9%<br>HCP: 50.0%<br>PCP: 85.7% | All: 7(6,8)<br>HCP:<br>6.5(4.75,8)<br>PCP: 7(7,9)   | No |
| 63.Is aggressive control of inflammation on colonic inflammatory bowel disease in primary sclerosing cholangitis associated with improved liver outcomes?        | - | - | All: 48.0%<br>HCP: 46.7%<br>PCP: 50.0% | All: 6(5,7)<br>HCP: 6(5,7)<br>PCP: 6(6,8)    | All: 50.0%<br>HCP: 42.9%<br>PCP: 60.0% | All:<br>6.5(5.25,7)<br>HCP: 6(5,7)<br>PCP: 6.5(6,8) | No |
| 64.What is the best way to survey for cholangiocarcinoma in primary sclerosing cholangitis?                                                                      | - | - | All: 61.5%<br>HCP: 60.0%<br>PCP: 63.6% | All: 7(5.75,8)<br>HCP: 7(5,7)<br>PCP: 7(6,9) | All: 60.0%<br>HCP: 57.1%<br>PCP: 63.6% | All: 7(6,8)<br>HCP: 7(5,7)<br>PCP: 7(6,9)           | No |
| 65.Should the criteria for polycystic liver disease and transplantation be changed to take into account the size the liver                                       | - | - | All: 29.2%<br>HCP: 13.3%<br>PCP: 55.6% | All: 4.5(2,7)<br>HCP: 4(2,6)                 | All: 30.4%<br>HCP: 7.1%<br>PCP: 66.7%  | All: 6(3,7)<br>HCP: 4(2,6)<br>PCP: 6(6,7.5)         | No |

|                                                                                                                         |   |   |                                        |                                                     |                                        |                                                                     |    |
|-------------------------------------------------------------------------------------------------------------------------|---|---|----------------------------------------|-----------------------------------------------------|----------------------------------------|---------------------------------------------------------------------|----|
| cysts can grow and the additional pressures on all the internal organs?                                                 |   |   |                                        | PCP:<br>4.5(5.5,7)                                  |                                        |                                                                     |    |
| 66.Does control of colitis at the time of liver transplant reduce the risk of recurrent primary sclerosing cholangitis? | - | - | All: 36.0%<br>HCP: 33.3%<br>PCP: 40.0% | All: 6(5,7)<br>HCP: 6(4,7)<br>PCP:<br>6(5,8.25)     | All: 33.3%<br>HCP: 28.6%<br>PCP: 40.0% | All: 6(5,7)<br>HCP:<br>6(3.75,7)<br>PCP:<br>6(5,8.25)               | No |
| 67.Are people with liver disease likely to develop other conditions, if so, what other conditions?                      | - | - | All: 42.9%<br>HCP: 13.3%<br>PCP: 76.9% | All: 6(3.25,7)<br>HCP: 5(2,6)<br>PCP:<br>6(6.5,8.5) | All: 46.4%<br>HCP: 14.3%<br>PCP: 78.6% | All:<br>6(3.25,7.75)<br>HCP:<br>4.5(2,5.25)<br>PCP:<br>6(6.75,8.25) | No |
| 68.Do people with liver disease have a reduced life expectancy?                                                         | - | - | All: 30.0%<br>HCP: 0.0%<br>PCP: 60.0%  | All: 5.5(3,8)<br>HCP: 4(1,5)<br>PCP: 5.5(6,9)       | All: 34.5%<br>HCP: 0.0%<br>PCP: 66.7%  | All: 6(3,8)<br>HCP:<br>3.5(1.75,5.25)                               | No |

|                                                                                                                                                       |   |   |                                        |                                           |                                        |                                                          |    |
|-------------------------------------------------------------------------------------------------------------------------------------------------------|---|---|----------------------------------------|-------------------------------------------|----------------------------------------|----------------------------------------------------------|----|
|                                                                                                                                                       |   |   |                                        |                                           |                                        | )<br>PCP: 6(6,9)                                         |    |
| 69.Should transjugular intrahepatic portosystemic shunt (TIPS) be used earlier in management of variceal haemorrhage?                                 | - | - | All: 51.9%<br>HCP: 53.3%<br>PCP: 50.0% | All: 7(5,7)<br>HCP: 7(5,8)<br>PCP: 7(5,7) | All: 55.6%<br>HCP: 57.1%<br>PCP: 53.8% | All: 7(6,7)<br>HCP:<br>7(5.75,8)<br>PCP: 7(5.5,7)        | No |
| 70.Should abnormal alanine transaminase (ALT) reference ranges be revised downwards in line with ACG (American College of Gastroenterology) guidance? | - | - | All: 36.0%<br>HCP: 33.3%<br>PCP: 40.0% | All: 6(5,7)<br>HCP: 6(5,7)<br>PCP: 6(5,7) | All: 37.5%<br>HCP: 35.7%<br>PCP: 44.4% | All: 6(5,7)<br>HCP:<br>6(4.5,7.25)<br>PCP:<br>6(5.875,7) | No |

a Questions from 49 to 70 were collected during the first round of Delphi.

b Consensus was reached when at least 80% of Delphi-panel members scored between 7 and 9 for the specific question.

Abbreviations:

HCP = Healthcare professionals

1  
2  
3 IQR = interquartile range  
4  
5

6 PCP = Patients, carers, and public  
7  
8

## 9 References

- 10  
11  
12 1. Majumdar A, Roccarina D, Thorburn D, Davidson BR, Tsochatzis E, Gurusamy KS. Management of people with early- or very early-stage  
13 hepatocellular carcinoma: an attempted network meta-analysis. The Cochrane database of systematic reviews. 2017;3:Cd011650. Epub 2017/03/30. doi:  
14 10.1002/14651858.CD011650.pub2. PubMed PMID: 28351116.  
15  
16 2. Saffioti F, Gurusamy KS, Hawkins N, Toon CD, Tsochatzis E, Davidson BR, et al. Pharmacological interventions for primary sclerosing cholangitis: an  
17 attempted network meta-analysis. The Cochrane database of systematic reviews. 2017;3:Cd011343. Epub 2017/04/19. doi:  
18 10.1002/14651858.CD011343.pub2. PubMed PMID: 28417463.  
19  
20 3. Lombardi R, Onali S, Thorburn D, Davidson BR, Gurusamy KS, Tsochatzis E. Pharmacological interventions for non-alcohol related fatty liver disease  
21 (NAFLD): an attempted network meta-analysis. The Cochrane database of systematic reviews. 2017;3:CD011640. Epub 2017/03/31. doi:  
22 10.1002/14651858.CD011640.pub2. PubMed PMID: 28358980.  
23  
24 4. Rodriguez-Peralvarez M, Guerrero-Misas M, Thorburn D, Davidson BR, Tsochatzis E, Gurusamy KS. Maintenance immunosuppression for adults  
25 undergoing liver transplantation: a network meta-analysis. The Cochrane database of systematic reviews. 2017;3:CD011639. Epub 2017/04/01. doi:  
26 10.1002/14651858.CD011639.pub2. PubMed PMID: 28362060.  
27  
28  
29  
30  
31  
32  
33  
34  
35  
36  
37  
38  
39  
40  
41  
42  
43  
44  
45  
46

- 1  
2  
3 5. Czaja AJ, Carpenter HA, Lindor KD. Ursodeoxycholic acid as adjunctive therapy for problematic type 1 autoimmune hepatitis: a randomised placebo-  
4 controlled treatment trial. *Hepatology (Baltimore, Md)*. 1999;30(6):1381-6. Epub 1999/11/26. doi: 10.1002/hep.510300603. PubMed PMID: 10573515.  
5  
6  
7 6. Manns MP, Woynarowski M, Kreisel W, Lurie Y, Rust C, Zuckerman E, et al. Budesonide induces remission more effectively than prednisone in a  
8 controlled trial of patients with autoimmune hepatitis. *Gastroenterology*. 2010;139(4):1198-206. Epub 2010/07/06. doi: 10.1053/j.gastro.2010.06.046.  
9  
10 PubMed PMID: 20600032.  
11  
12 7. Woynarowski M, Nemeth A, Baruch Y, Koletzko S, Melter M, Rodeck B, et al. Budesonide versus prednisone with azathioprine for the treatment of  
13 autoimmune hepatitis in children and adolescents. *The Journal of pediatrics*. 2013;163(5):1347-53.e1. Epub 2013/07/03. doi: 10.1016/j.jpeds.2013.05.042.  
14  
15 PubMed PMID: 23810723.  
16  
17 8. Saffioti F, Gurusamy KS, Eusebi LH, Tsochatzis E, Davidson BR, Thorburn D. Pharmacological interventions for primary biliary cholangitis: an  
18 attempted network meta-analysis. *The Cochrane database of systematic reviews*. 2017;3:CD011648. Epub 2017/03/30. doi:  
19  
20 10.1002/14651858.CD011648.pub2. PubMed PMID: 28350426.  
21  
22  
23  
24  
25  
26  
27  
28  
29  
30  
31  
32  
33  
34  
35  
36  
37  
38  
39  
40  
41  
42  
43  
44  
45  
46
